# Supplementary material for: Generation and trapping of electron-deficient 1,2-cyclohexadienes. Unexpected hetero-Diels–Alder reactivity
Source: Royal Society of Chemistry journal article supplement (doi:10.1039/d0ob02285c), 2020-11-23
Supplement: d0ob02285c1.pdf [file d0ob02285c1.pdf]

# Generation and Trapping of Electron-Deficient 1,2-Cyclohexadienes. Unexpected Hetero-Diels-Alder Reactivity

Baolei Wang,<sup>a,b</sup> Marius-Georgian Constantin,<sup>a</sup> Simarpreet Singh,<sup>c</sup> Rebecca L. Davis,<sup>\*,c</sup> and F. G. West<sup>\*a</sup>

<sup>a</sup> Department of Chemistry, University of Alberta, E3-43 Gunning-Lemieux Chemistry Centre, Edmonton, AB, Canada, T6G 2G2. Tel: +1 780 492-8187; Fax: +1 780 492 8231.

<sup>b</sup> State-Key Laboratory of Elemento-Organic Chemistry, Collaborative Innovation Center of Chemical Science and Engineering, College of Chemistry, Nankai University, Tianjin 300071, P. R. China.

<sup>c</sup> Department of Chemistry, University of Manitoba, 360 Parker Bldg., 144 Dysart Rd., Winnipeg, MN, Canada R3T 2N2.

frederick.west@ualberta.ca  
rebecca.davis@umannitoba.ca

## Electronic Supplementary Information, Part 2 (Computational Results)

### Table of Contents

|                                                                              |      |
|------------------------------------------------------------------------------|------|
| 1. Computational Methods.....                                                | S-2  |
| 1.1 Choice of Computational Method.....                                      | S-2  |
| 2. Computational Results.....                                                | S-3  |
| 2.1 Computed Energies of Trapping Reactions Between Allenes and Dienes.....  | S-3  |
| 2.2 Discussion of Observed Exo Cycloadduct <b>13d</b> .....                  | S-3  |
| 2.3 Lowest Unoccupied Molecular Orbital (LUMO) Coefficients of Allenes.....  | S-5  |
| 2.4 Discussion of [2+2] Dimerization of <b>7a</b> .....                      | S-5  |
| 2.5 Discussion of Trapping of Allene <b>7a</b> with Enamine <b>15a</b> ..... | S-6  |
| 3. Energies and Reaction Coordinates.....                                    | S-8  |
| References.....                                                              | S-65 |

# 1. Computational Methods

All structures were optimized using M06-2X<sup>1</sup> with the double- $\zeta$  split valence 6-31+G(d,p) basis set. Solvation with tetrahydrofuran was performed using the Integration Equation Formalism Polarizable Continuum Model (IEFPCM)<sup>2</sup> model and vibrational analysis verified that each structure was either a minimum or transition state. All optimizations were performed in Gaussian 09.e01.<sup>3</sup> Non-covalent interaction (NCI)<sup>4,5</sup> plots were used to further elucidate the secondary orbital interactions in cycloaddition transition state structures. NCI figures were generated on VMD<sup>6</sup> with isovalue of 0.3 and the remaining figures were created using Vesta.<sup>7</sup>

## 1.1. Choice of Computational Method

DFT methods were used to study the reactivity of allene **7d** with furan (Figure S1). The results from both, M06-2X/6-31+G(d,p)/IEFPCM(THF) and  $\omega$ B97XD/6-31+G(d,p)/IEFPCM(THF), were able to explain the observed selectivity.

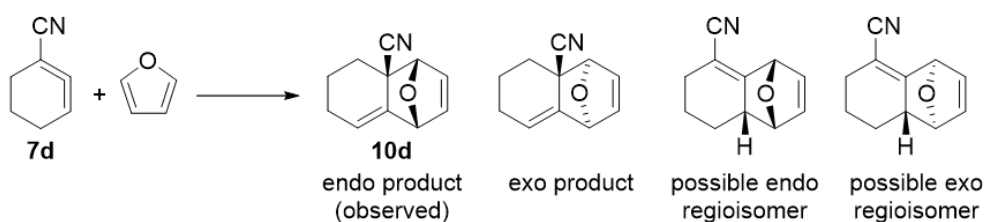

| Level of Theory                        | Diastereoselectivity             |                                  | Regioselectivity                       |                                       |
|----------------------------------------|----------------------------------|----------------------------------|----------------------------------------|---------------------------------------|
|                                        | $\Delta G^\ddagger_{\text{Obs}}$ | $\Delta G^\ddagger_{\text{Exo}}$ | $\Delta G^\ddagger_{\text{RegioEndo}}$ | $\Delta G^\ddagger_{\text{RegioExo}}$ |
| M06-2X/6-31+G(d,p)/IEFPCM(THF)         | 12.3                             | 14.2                             | 13.7                                   | 13.3                                  |
| $\omega$ B97XD/6-31+G(d,p)/IEFPCM(THF) | 11.6                             | 13.8                             | 14.2                                   | 13.8                                  |

Figure S1: DFT methods tested to explain the observed selectivity between allene **7d** and furan. All values reported in kcal/mol

## 2. Computational Results

### 2.1. Computed energies of trapping reactions between allenes and dienes

The results of computations performed on the Diels-Alder reactions of allenes **7a** and **7d** with furan, 2,5-Dimethylfuran, and DPIBF are presented in Table S1, S2, and S3. It was determined that the formation of endo product was favoured for both allenes **7a** and **7d**.

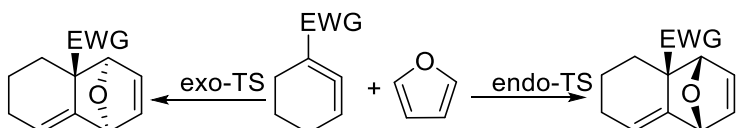

| Allene    | Exo   | Exo-TS | Allene + Furan | Endo-TS | Endo  |
|-----------|-------|--------|----------------|---------|-------|
| <b>7a</b> | -24.1 | +14.2  | 0.0            | +12.3   | -23.7 |
| <b>7d</b> | -29.4 | +12.7  | 0.0            | +10.6   | -30.4 |

Table S1: Energies of trapping reactions with Furan. All free energies reported in kcal/mol

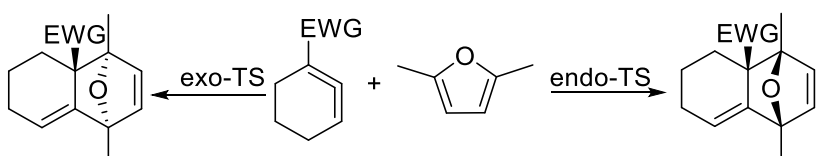

| EWG       | Exo   | Exo-TS | Allene + DiMeFuran | Endo-TS | Endo  |
|-----------|-------|--------|--------------------|---------|-------|
| <b>7a</b> | -21.4 | +15.4  | 0.0                | +13.5   | -20.5 |
| <b>7d</b> | -30.4 | +12.3  | 0.0                | +9.0    | -31.5 |

Table S2: Energies of trapping reactions with 2,5-Dimethylfuran. All free energies reported in kcal/mol

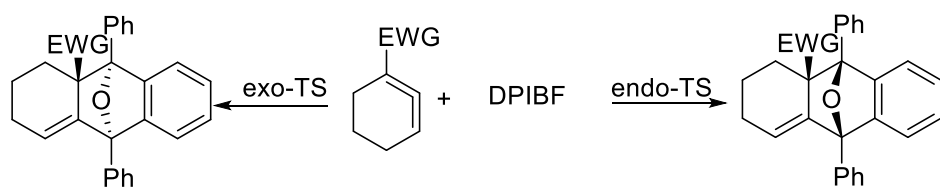

| EWG       | Exo   | Exo-TS | Allene + DPIBF | Endo-TS | Endo  |
|-----------|-------|--------|----------------|---------|-------|
| <b>7a</b> | -35.0 | +9.7   | 0.0            | +8.6    | -35.7 |
| <b>7d</b> | -46.6 | +6.0   | 0.0            | +5.9    | -45.1 |

Table S3: Energies of trapping reactions with DPIBF. All free energies reported in kcal/mol

### 2.2. Discussion of observed exo cycloadduct **13d**

The computations show that the barrier for formation of endo cycloadduct is generally favoured (Table S2). However, both *endo* and *exo* cycloadducts were observed with allene **7d** (EWG=CN) when trapping reaction with DPIBF. The DFT calculations performed on substrate **5d** shows that the barrier for formation of *endo* cycloadduct is favoured by 2.1 kcal/mol for furan, 3.3 kcal/mol for 2,5-Dimethylfuran, and 0.1 kcal/mol for DPIBF (Table S4). Since the barrier for formation is similar for both endo and exo cycloadducts, the theoretical results are consistent with experimental results such that both cycloadducts are observed.

|                | Furan | Dimethylfuran | DPIBF | Isobenzofuran | Diphenylfuran |
|----------------|-------|---------------|-------|---------------|---------------|
| <b>Endo-TS</b> | 10.6  | 9.0           | 5.9   | 6.7           | 11.0          |
| <b>Exo-TS</b>  | 12.7  | 12.3          | 6.0   | 7.7           | 12.5          |

Table S4: Transition state energies of trapping allene **7d** with various dienes. All free energies are reported in kcal/mol.

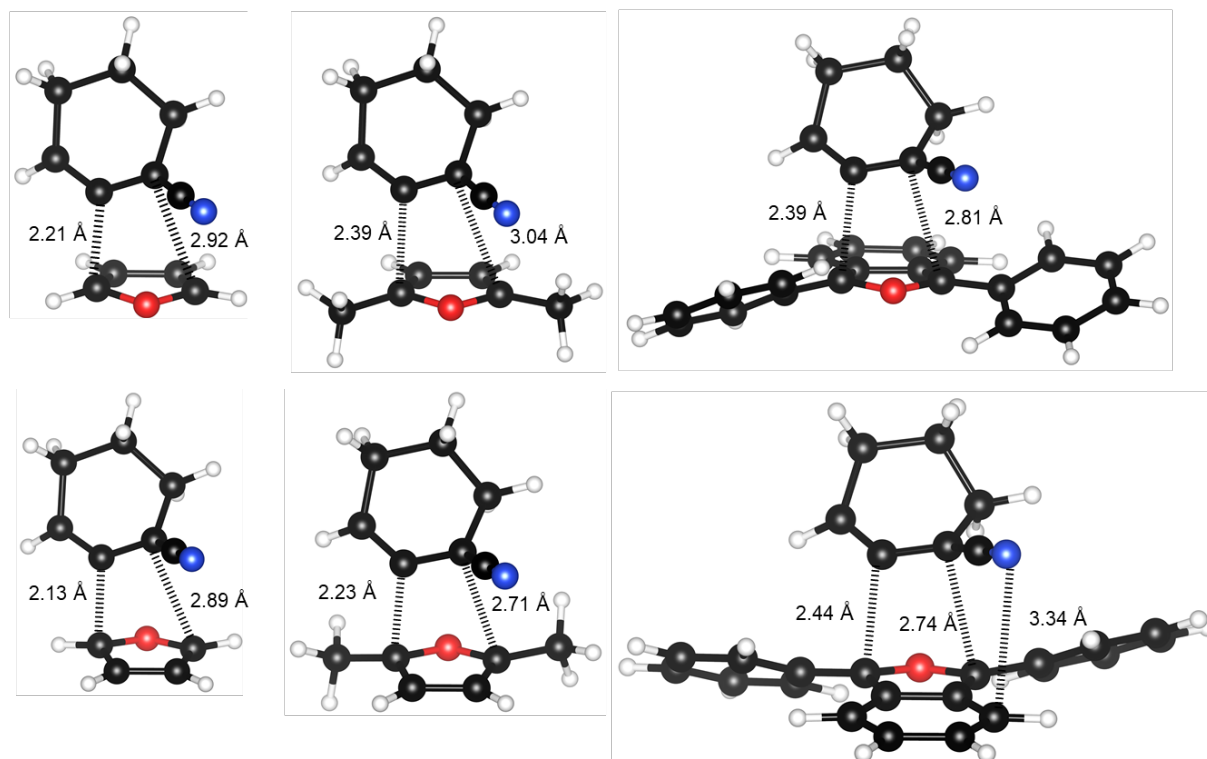

Figure S2: Transition state structures of endo approach (top) and exo approach (bottom) of furan (left), 2,5-Dimethylfuran (center), and DPIBF (right)

In order to understand the observation of both endo and exo product for allene **7d** with DPIBF, the transition state structures were examined. In figure S2, the cyano group is directly on top the pi-system of isobenzofuran moiety of DPIBF, for exo TS, which might result in favourable secondary orbital interactions to lower the barrier. This interaction is absent in the endo TS.

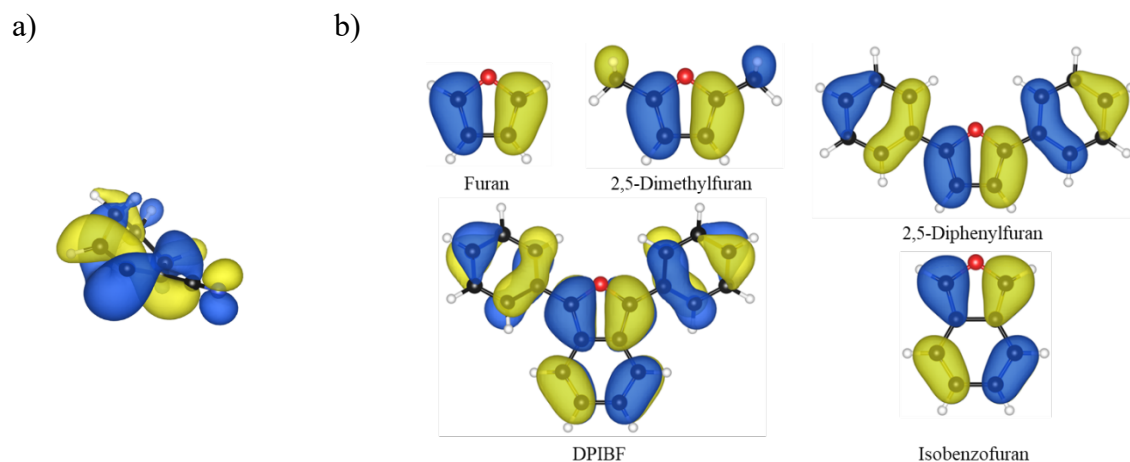

Figure S3a) LUMO of allene **7d**. b) HOMOs of various Dienes

In order to gain more insight about this favourable orbital interaction, barriers for formation of endo and exo cycloadducts with 2,5-Diphenylfuran and Isobenzofuran were also calculated. The difference in barriers between formation endo and exo cycloadduct is 1.5 kcal/mol for Diphenylfuran and 1.0 kcal/mol for isobenzofuran, favouring the endo. Similar to DPIBF exo-TS, favourable interaction in the exo approach for isobenzofuran can be observed (Figure S4). This favourable interaction helps explain the presence of exo adduct from **7d** and DPIBF.

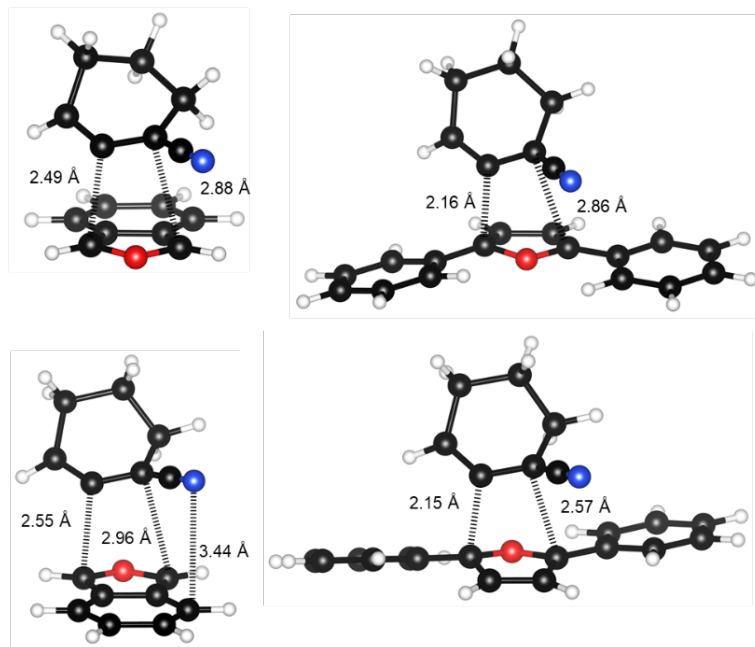

Figure S4: Transition state structures of endo approach (Top) and exo approach (bottom) of isobenzofuran (left) and 2,5-Diphenylfuran (right)

### 2.3. Lowest Unoccupied Molecular Orbital (LUMO) Coefficients of Allenes

| EWG (allene)       | 1     | 2     | 3     |
|--------------------|-------|-------|-------|
| COPh ( <b>7a</b> ) | 11.56 | 28.07 | 31.98 |
| CN ( <b>7d</b> )   | 19.24 | 32.17 | 12.16 |

Table S5: LUMO Coefficients of Allenes

### 2.4. Discussion of [2+2] dimerization of **7a**

The dimerization of **7a** via a [2+2] cycloaddition was also considered and found to be 4.6 kcal/mol lower in energy than the [4+2] pathway. This is consistent with previous studies on allene dimerization however it is not consistent with the observed product distribution and suggests that this system may be more complex than initially expected. Further computational work into the reactivity of this system is ongoing

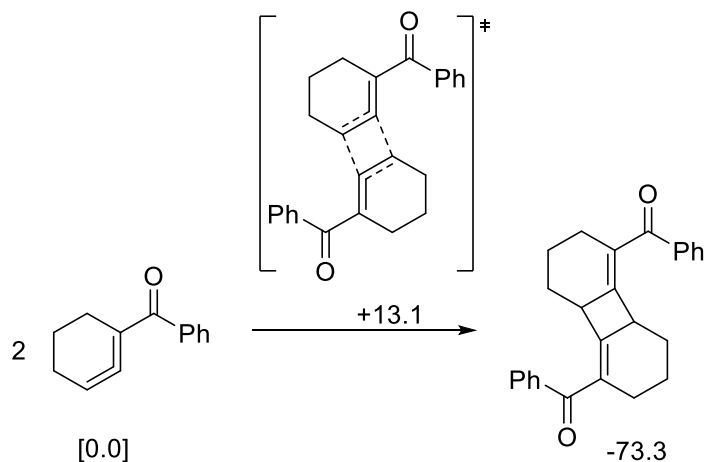

Scheme S1: [2+2] Dimerization of Allene 7a

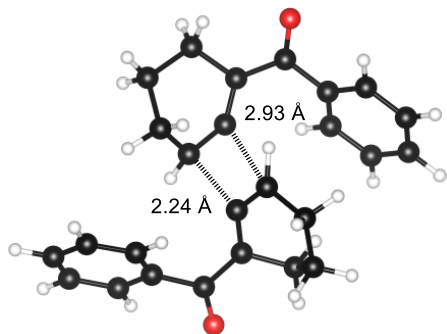

Figure S 5: Transition state structure of [2+2]

## 2.5. Discussion of trapping allene 7a with enamine 15a

The trapping of allene **7a** with enamine **15a** resulted in only one observed cycloadduct. The observed cycloadduct proceeds via an asynchronous Diels-Alder pathway with a barrier of 12.4 kcal/mol and is exergonic by 52.4 kcal/mol. We further examined the reactivity of enamine **15a** with **7a** to determine if a [2+2] product (**16a'**) was plausible. The DFT calculations suggest that the observed product **16a** is thermodynamically favoured by 21.5 kcal/mol compared to **17a**. The calculations also suggest that the formation of **17a** proceeds via stepwise ionic addition of nucleophilic **15a** to electron deficient **7a**. The first step to form **INT1** has a barrier of 16.2 kcal/mol (3.8 kcal/mol higher than [4+2] barrier) and is exergonic by 20.3 kcal/mol. Additionally, relative to **INT**, the second step proceeds with a barrier of 11.6 kcal/mol, resulting in **17a**. Hence, the formation of **16a** is both kinetically and thermodynamically favoured than **17a**.

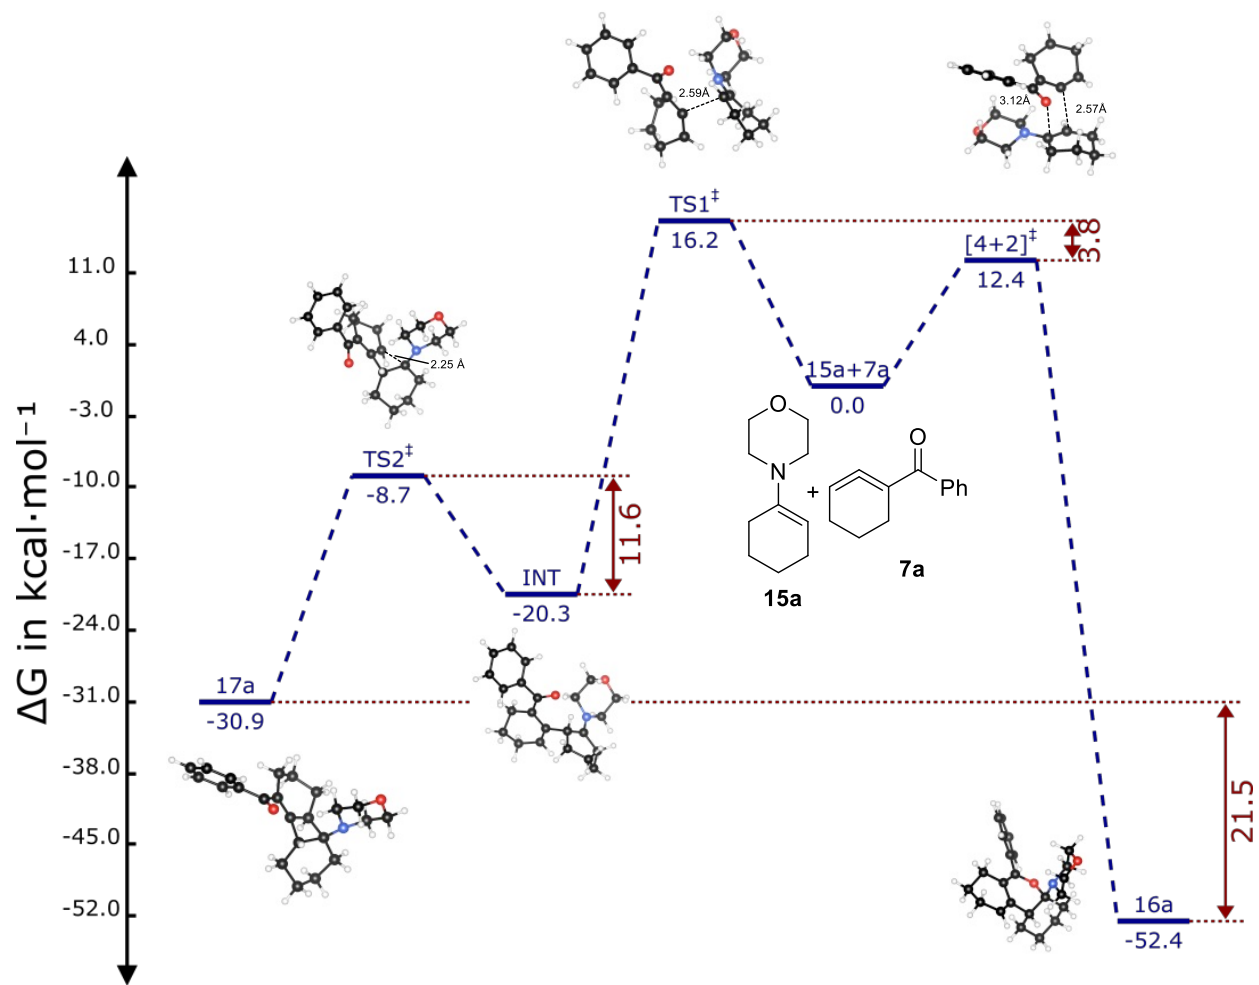

Figure S5: Potential energy surface of reactivity of enamine **15a** with allene **7a**

### 3. Energies and Reaction Coordinates

Allene 7a

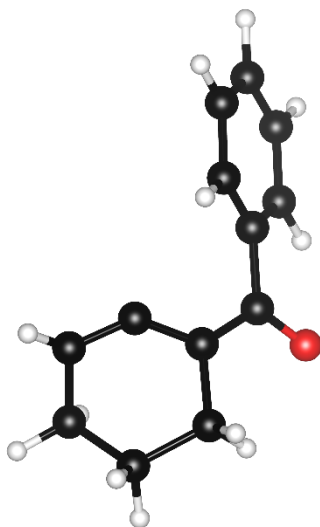

HF (M062X/6-31+G(d,p)) = -577.5243274 Hartrees

Imaginary Frequencies: none found

Zero-point correction = 0.213763 (Hartree/Particle)

Thermal correction = 0.174502 Hartrees

Coordinates from last standard orientation:

| Center<br>Number | Atomic<br>Number | Atomic<br>Type | Coordinates (Angstroms) |           |           |
|------------------|------------------|----------------|-------------------------|-----------|-----------|
|                  |                  |                | X                       | Y         | Z         |
| 1                | 6                | 0              | 2.916646                | -1.404020 | -0.633421 |
| 2                | 6                | 0              | 3.873501                | -0.791467 | 0.173188  |
| 3                | 6                | 0              | 3.575416                | 0.409178  | 0.822053  |
| 4                | 6                | 0              | 2.323470                | 0.992572  | 0.661637  |
| 5                | 6                | 0              | 1.349229                | 0.370425  | -0.129922 |
| 6                | 6                | 0              | 1.654259                | -0.829833 | -0.782724 |
| 7                | 1                | 0              | 3.151998                | -2.327385 | -1.152790 |
| 8                | 1                | 0              | 4.853041                | -1.244002 | 0.292950  |
| 9                | 1                | 0              | 4.320043                | 0.887872  | 1.450093  |
| 10               | 1                | 0              | 2.079090                | 1.929079  | 1.153127  |
| 11               | 1                | 0              | 0.922769                | -1.300938 | -1.429464 |
| 12               | 6                | 0              | 0.022564                | 1.053057  | -0.258690 |
| 13               | 6                | 0              | -1.189574               | 0.236744  | -0.481425 |
| 14               | 8                | 0              | -0.055970               | 2.272197  | -0.154195 |
| 15               | 6                | 0              | -1.330518               | -1.045267 | -0.162128 |
| 16               | 6                | 0              | -2.300580               | -1.778813 | 0.336761  |
| 17               | 6                | 0              | -2.543229               | 0.916733  | -0.717797 |
| 18               | 6                | 0              | -3.700185               | 0.197047  | 0.035767  |
| 19               | 1                | 0              | -4.325692               | 0.949115  | 0.527569  |
| 20               | 6                | 0              | -3.248847               | -0.851271 | 1.096606  |
| 21               | 1                | 0              | -4.113581               | -1.391904 | 1.489234  |
| 22               | 1                | 0              | -2.411777               | 1.937929  | -0.345503 |
| 23               | 1                | 0              | -2.778889               | 0.994108  | -1.783124 |
| 24               | 1                | 0              | -4.336817               | -0.322989 | -0.686831 |



|    |   |   |           |           |          |
|----|---|---|-----------|-----------|----------|
| 25 | 1 | 0 | -2.742120 | -0.359827 | 1.930850 |
| 26 | 1 | 0 | -2.583225 | -2.779147 | 0.028019 |

---

### Rotated Allene 7a

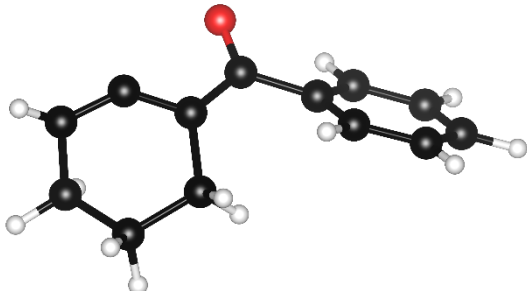

HF (M062X/6-31+G(d,p)) = -577.5186449 Hartrees

Imaginary Frequencies: none found

Zero-point correction = 0.214001 (Hartree/Particle)

Thermal correction = 0.175151 Hartrees

Coordinates from last standard orientation:

---

| Center<br>Number | Atomic<br>Number | Atomic<br>Type | Coordinates (Angstroms) |           |           |
|------------------|------------------|----------------|-------------------------|-----------|-----------|
|                  |                  |                | X                       | Y         | Z         |
| 1                | 6                | 0              | -2.938213               | 1.355411  | 0.651715  |
| 2                | 6                | 0              | -3.880396               | 0.747143  | -0.177460 |
| 3                | 6                | 0              | -3.561278               | -0.431944 | -0.853795 |
| 4                | 6                | 0              | -2.301989               | -1.003389 | -0.697348 |
| 5                | 6                | 0              | -1.346242               | -0.384546 | 0.115340  |
| 6                | 6                | 0              | -1.668876               | 0.797259  | 0.790031  |
| 7                | 1                | 0              | -3.190935               | 2.262947  | 1.190325  |
| 8                | 1                | 0              | -4.864970               | 1.189270  | -0.294289 |
| 9                | 1                | 0              | -4.295629               | -0.905449 | -1.497593 |
| 10               | 1                | 0              | -2.042943               | -1.928598 | -1.202932 |
| 11               | 1                | 0              | -0.940330               | 1.267486  | 1.444023  |
| 12               | 6                | 0              | -0.017994               | -1.050290 | 0.297540  |
| 13               | 6                | 0              | 1.198154                | -0.213737 | 0.500854  |
| 14               | 8                | 0              | 0.058578                | -2.271220 | 0.280739  |
| 15               | 6                | 0              | 2.382468                | -0.757504 | 0.753283  |
| 16               | 6                | 0              | 3.624656                | -0.522110 | 0.401282  |
| 17               | 6                | 0              | 1.346290                | 1.242397  | 0.025515  |
| 18               | 6                | 0              | 2.737289                | 1.504174  | -0.633687 |
| 19               | 1                | 0              | 2.587263                | 2.055642  | -1.567450 |
| 20               | 6                | 0              | 3.590579                | 0.235112  | -0.927253 |
| 21               | 1                | 0              | 4.593573                | 0.521782  | -1.252923 |
| 22               | 1                | 0              | 0.550726                | 1.404582  | -0.710350 |
| 23               | 1                | 0              | 1.183383                | 1.969286  | 0.826696  |
| 24               | 1                | 0              | 3.328619                | 2.148480  | 0.024028  |
| 25               | 1                | 0              | 3.131994                | -0.366064 | -1.716124 |
| 26               | 1                | 0              | 4.503925                | -0.557457 | 1.034572  |

---

### Allene 7d

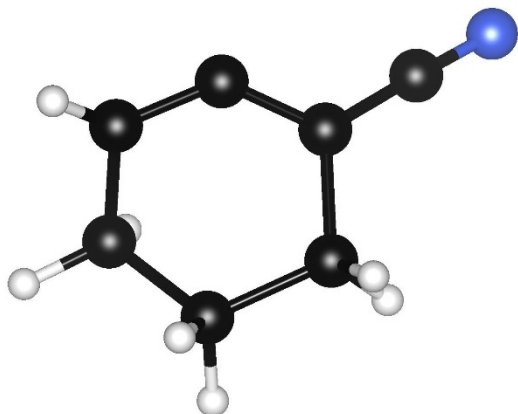

HF (M062X/6-31+G(d,p)) = -325.4744092 Hartrees

Imaginary Frequencies: none found

Zero-point correction = 0.121012 (Hartree/Particle)

Thermal correction = 0.089440 Hartrees

Coordinates from last standard orientation:

| Center<br>Number | Atomic<br>Number | Atomic<br>Type | Coordinates (Angstroms) |           |           |
|------------------|------------------|----------------|-------------------------|-----------|-----------|
|                  |                  |                | X                       | Y         | Z         |
| 1                | 6                | 0              | 0.712299                | -0.079119 | -0.337109 |
| 2                | 6                | 0              | -0.074341               | -1.143408 | -0.430077 |
| 3                | 6                | 0              | -1.365865               | -1.317030 | -0.242597 |
| 4                | 6                | 0              | -0.044181               | 1.259150  | -0.400868 |
| 5                | 6                | 0              | -1.528338               | 1.089029  | 0.033617  |
| 6                | 1                | 0              | -1.793409               | 1.910360  | 0.706451  |
| 7                | 6                | 0              | -1.869070               | -0.261553 | 0.735070  |
| 8                | 1                | 0              | -2.945647               | -0.339458 | 0.901710  |
| 9                | 1                | 0              | 0.479443                | 1.934216  | 0.284517  |
| 10               | 1                | 0              | 0.013000                | 1.707397  | -1.396226 |
| 11               | 1                | 0              | -2.173991               | 1.174397  | -0.845162 |
| 12               | 1                | 0              | -1.362069               | -0.334022 | 1.699930  |
| 13               | 1                | 0              | -2.034078               | -1.891843 | -0.875021 |
| 14               | 6                | 0              | 2.079842                | -0.113464 | 0.085427  |
| 15               | 7                | 0              | 3.193524                | -0.108953 | 0.409003  |

### Allene 7a: Diels-Alder Dimerization Transition State

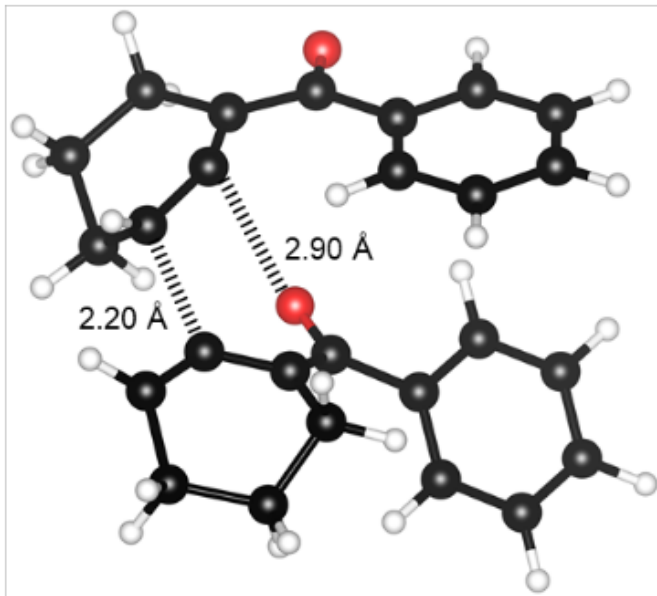

HF (M062X/6-31+G(d,p)) = -1155.0452456 Hartrees

Imaginary Frequencies: 1 (-209.59  $\text{cm}^{-1}$ )

Zero-point correction = 0.428352 (Hartree/Particle)

Thermal correction = 0.373832 Hartrees

Coordinates from last standard orientation:

| Center<br>Number | Atomic<br>Number | Atomic<br>Type | Coordinates (Angstroms) |           |           |
|------------------|------------------|----------------|-------------------------|-----------|-----------|
|                  |                  |                | X                       | Y         | Z         |
| 1                | 6                | 0              | -1.408977               | 3.989827  | 0.801956  |
| 2                | 6                | 0              | -1.350720               | 2.514566  | 1.276407  |
| 3                | 6                | 0              | -0.380855               | 1.805938  | 0.343385  |
| 4                | 6                | 0              | 0.827028                | 2.432776  | 0.405763  |
| 5                | 6                | 0              | 1.138820                | 3.676340  | 0.739965  |
| 6                | 6                | 0              | -0.017222               | 4.671273  | 0.706910  |
| 7                | 6                | 0              | -0.663590               | 0.769541  | -0.634117 |
| 8                | 6                | 0              | 2.713144                | 1.309476  | 0.369189  |
| 9                | 6                | 0              | 2.522135                | 0.004473  | 0.559396  |
| 10               | 6                | 0              | 2.831995                | -1.142650 | 0.000710  |
| 11               | 6                | 0              | 4.073394                | -0.999305 | -0.900111 |
| 12               | 6                | 0              | 4.389405                | 0.482529  | -1.231826 |
| 13               | 6                | 0              | 3.183256                | 1.448740  | -1.087543 |
| 14               | 1                | 0              | -1.885864               | 4.009145  | -0.183754 |
| 15               | 1                | 0              | -0.979627               | 2.471557  | 2.306411  |
| 16               | 1                | 0              | 2.093673                | 3.985469  | 1.153695  |
| 17               | 1                | 0              | 0.027117                | 5.312890  | -0.179242 |
| 18               | 1                | 0              | 4.950814                | -1.493607 | -0.472813 |
| 19               | 1                | 0              | 5.188612                | 0.841174  | -0.573793 |
| 20               | 1                | 0              | 2.365864                | 1.166876  | -1.756013 |
| 21               | 1                | 0              | 3.805735                | -1.553208 | -1.806977 |
| 22               | 1                | 0              | 4.773939                | 0.535877  | -2.255792 |
| 23               | 1                | 0              | 3.477572                | 2.482469  | -1.294508 |
| 24               | 1                | 0              | 3.131983                | 1.939509  | 1.149789  |
| 25               | 1                | 0              | 0.139845                | 5.328242  | 1.570396  |
| 26               | 1                | 0              | -2.048293               | 4.571190  | 1.474717  |

|    |   |   |           |           |           |
|----|---|---|-----------|-----------|-----------|
| 27 | 1 | 0 | -2.345744 | 2.063378  | 1.265540  |
| 28 | 8 | 0 | 0.262813  | 0.220736  | -1.243753 |
| 29 | 6 | 0 | -2.066326 | 0.287071  | -0.872097 |
| 30 | 6 | 0 | -2.272776 | -1.087193 | -1.035545 |
| 31 | 6 | 0 | -3.145532 | 1.164461  | -1.015323 |
| 32 | 6 | 0 | -3.546813 | -1.579299 | -1.302712 |
| 33 | 1 | 0 | -1.425882 | -1.761724 | -0.939628 |
| 34 | 6 | 0 | -4.417925 | 0.673643  | -1.306275 |
| 35 | 1 | 0 | -2.990916 | 2.236047  | -0.927113 |
| 36 | 6 | 0 | -4.622076 | -0.699375 | -1.439675 |
| 37 | 1 | 0 | -3.700992 | -2.649053 | -1.408208 |
| 38 | 1 | 0 | -5.246568 | 1.363761  | -1.430144 |
| 39 | 1 | 0 | -5.614696 | -1.082602 | -1.655888 |
| 40 | 6 | 0 | 1.984307  | -2.353771 | -0.100852 |
| 41 | 8 | 0 | 2.338353  | -3.266999 | -0.834382 |
| 42 | 6 | 0 | 0.708198  | -2.475919 | 0.687638  |
| 43 | 6 | 0 | 0.021946  | -3.693218 | 0.589611  |
| 44 | 6 | 0 | 0.161648  | -1.451591 | 1.469345  |
| 45 | 6 | 0 | -1.185668 | -3.883389 | 1.254758  |
| 46 | 1 | 0 | 0.447379  | -4.480872 | -0.023250 |
| 47 | 6 | 0 | -1.049472 | -1.639164 | 2.131405  |
| 48 | 1 | 0 | 0.657902  | -0.486291 | 1.555211  |
| 49 | 6 | 0 | -1.724588 | -2.854822 | 2.028042  |
| 50 | 1 | 0 | -1.707435 | -4.831120 | 1.166488  |
| 51 | 1 | 0 | -1.469253 | -0.827870 | 2.718581  |
| 52 | 1 | 0 | -2.670904 | -2.996869 | 2.540949  |

### Allene 7a Dimerization product

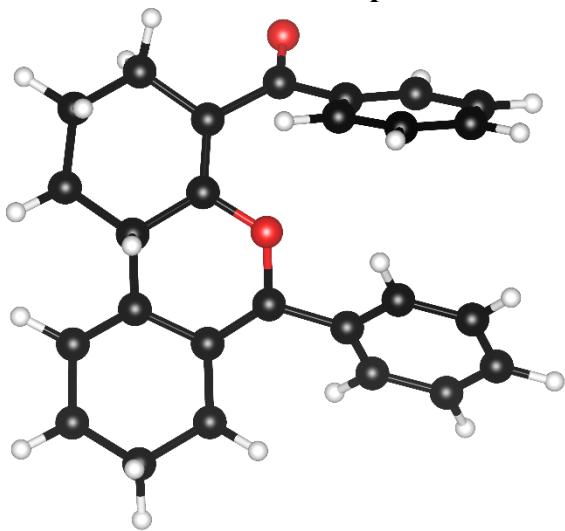

HF (M062X/6-31+G(d,p)) = -1155.2285749 Hartrees

Imaginary Frequencies: none found

Zero-point correction = 0.437060 (Hartree/Particle)

Thermal correction = 0.384690 Hartrees

Coordinates from last standard orientation:

Center Atomic Atomic Coordinates (Angstroms)

| Number | Number | Type | X         | Y         | Z         |
|--------|--------|------|-----------|-----------|-----------|
| 1      | 6      | 0    | -4.175111 | 2.333655  | -0.529226 |
| 2      | 6      | 0    | -2.785487 | 2.396019  | 0.103072  |
| 3      | 6      | 0    | -2.027607 | 1.095858  | -0.081081 |
| 4      | 6      | 0    | -2.818760 | -0.135363 | -0.234335 |
| 5      | 6      | 0    | -4.159656 | -0.118503 | -0.125495 |
| 6      | 6      | 0    | -4.954586 | 1.149002  | 0.034875  |
| 7      | 6      | 0    | -0.679498 | 1.025973  | -0.079423 |
| 8      | 6      | 0    | -2.062490 | -1.402137 | -0.604454 |
| 9      | 6      | 0    | -0.649792 | -1.361095 | -0.085258 |
| 10     | 6      | 0    | 0.020556  | -2.409029 | 0.430817  |
| 11     | 6      | 0    | -0.630656 | -3.765819 | 0.579832  |
| 12     | 6      | 0    | -1.832020 | -3.903484 | -0.351998 |
| 13     | 6      | 0    | -2.763628 | -2.704177 | -0.204156 |
| 14     | 1      | 0    | -4.705596 | 3.272443  | -0.343847 |
| 15     | 1      | 0    | -2.213062 | 3.228856  | -0.315108 |
| 16     | 1      | 0    | -4.715002 | -1.049176 | -0.202102 |
| 17     | 1      | 0    | -5.186450 | 1.324185  | 1.095541  |
| 18     | 1      | 0    | 0.111441  | -4.544134 | 0.370943  |
| 19     | 1      | 0    | -1.483456 | -3.970720 | -1.390812 |
| 20     | 1      | 0    | -3.094519 | -2.621806 | 0.839402  |
| 21     | 1      | 0    | -0.940398 | -3.911248 | 1.622686  |
| 22     | 1      | 0    | -2.372161 | -4.829131 | -0.131876 |
| 23     | 1      | 0    | -3.657871 | -2.841037 | -0.818598 |
| 24     | 1      | 0    | -1.959769 | -1.386429 | -1.703532 |
| 25     | 1      | 0    | -5.917845 | 1.040014  | -0.474329 |
| 26     | 1      | 0    | -4.079508 | 2.216542  | -1.615691 |
| 27     | 1      | 0    | -2.910591 | 2.600185  | 1.176017  |
| 28     | 8      | 0    | 0.003766  | -0.170583 | -0.211705 |
| 29     | 6      | 0    | 0.304663  | 2.122572  | 0.071041  |
| 30     | 6      | 0    | 1.522171  | 2.044529  | -0.623187 |
| 31     | 6      | 0    | 0.090600  | 3.204680  | 0.934626  |
| 32     | 6      | 0    | 2.479570  | 3.045291  | -0.488799 |
| 33     | 1      | 0    | 1.719358  | 1.188469  | -1.261161 |
| 34     | 6      | 0    | 1.052562  | 4.204496  | 1.069019  |
| 35     | 1      | 0    | -0.812725 | 3.254198  | 1.531424  |
| 36     | 6      | 0    | 2.246250  | 4.133636  | 0.352754  |
| 37     | 1      | 0    | 3.414432  | 2.967368  | -1.036221 |
| 38     | 1      | 0    | 0.872133  | 5.031791  | 1.748335  |
| 39     | 1      | 0    | 2.995328  | 4.911652  | 0.461760  |
| 40     | 6      | 0    | 1.401618  | -2.272383 | 0.972356  |
| 41     | 8      | 0    | 1.698559  | -2.839723 | 2.016216  |
| 42     | 6      | 0    | 2.446177  | -1.513521 | 0.212910  |
| 43     | 6      | 0    | 3.467277  | -0.870433 | 0.917150  |
| 44     | 6      | 0    | 2.448817  | -1.500008 | -1.185033 |
| 45     | 6      | 0    | 4.472348  | -0.196590 | 0.227493  |
| 46     | 1      | 0    | 3.456840  | -0.895445 | 2.002580  |
| 47     | 6      | 0    | 3.473962  | -0.856321 | -1.874413 |
| 48     | 1      | 0    | 1.650246  | -1.997993 | -1.728540 |
| 49     | 6      | 0    | 4.480287  | -0.195046 | -1.168086 |
| 50     | 1      | 0    | 5.251674  | 0.323149  | 0.775930  |
| 51     | 1      | 0    | 3.483089  | -0.861304 | -2.959868 |
| 52     | 1      | 0    | 5.270413  | 0.321197  | -1.705025 |

### 5a conjugate base

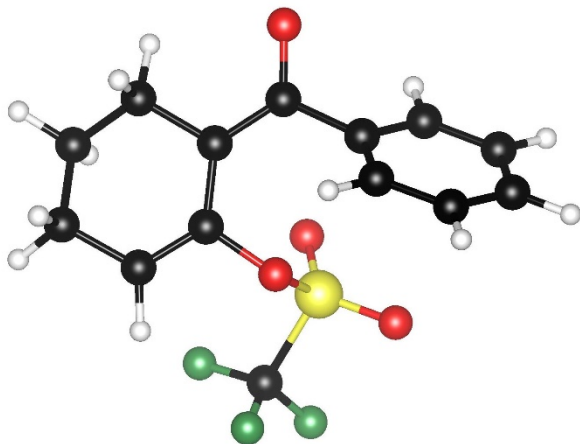

HF (M062X/6-31+G(d,p)) = -1538.9291625 Hartrees

Imaginary Frequencies: none found

Zero-point correction = 0.244850 (Hartree/Particle)

Thermal correction = 0.196083 Hartrees

Coordinates from last standard orientation:

| Center<br>Number | Atomic<br>Number | Atomic<br>Type | Coordinates (Angstroms) |           |           |
|------------------|------------------|----------------|-------------------------|-----------|-----------|
|                  |                  |                | X                       | Y         | Z         |
| 1                | 6                | 0              | 3.721131                | -1.038976 | -0.735731 |
| 2                | 6                | 0              | 3.943764                | -1.407952 | 0.591335  |
| 3                | 6                | 0              | 3.308345                | -0.707934 | 1.617336  |
| 4                | 6                | 0              | 2.447843                | 0.346513  | 1.315597  |
| 5                | 6                | 0              | 2.216265                | 0.721731  | -0.010856 |
| 6                | 6                | 0              | 2.872678                | 0.026484  | -1.031639 |
| 7                | 1                | 0              | 4.210122                | -1.580899 | -1.540357 |
| 8                | 1                | 0              | 4.607671                | -2.235219 | 0.824772  |
| 9                | 1                | 0              | 3.481890                | -0.984985 | 2.653409  |
| 10               | 1                | 0              | 1.942715                | 0.884661  | 2.113952  |
| 11               | 1                | 0              | 2.707070                | 0.327025  | -2.062814 |
| 12               | 6                | 0              | 1.384129                | 1.934986  | -0.358861 |
| 13               | 6                | 0              | 0.033744                | 2.051919  | -0.008154 |
| 14               | 8                | 0              | 2.023261                | 2.857142  | -0.960432 |
| 15               | 6                | 0              | -0.828503               | 1.072259  | 0.581854  |
| 16               | 6                | 0              | -2.097730               | 1.248253  | 1.008634  |
| 17               | 6                | 0              | -0.635541               | 3.391457  | -0.268084 |
| 18               | 6                | 0              | -2.158426               | 3.297294  | -0.387623 |
| 19               | 1                | 0              | -2.588947               | 4.298491  | -0.499523 |
| 20               | 6                | 0              | -2.764627               | 2.584979  | 0.825942  |
| 21               | 1                | 0              | -3.843685               | 2.446761  | 0.692253  |
| 22               | 1                | 0              | -0.385337               | 4.103075  | 0.535471  |
| 23               | 1                | 0              | -0.208836               | 3.813039  | -1.183664 |
| 24               | 1                | 0              | -2.415664               | 2.727307  | -1.289754 |
| 25               | 1                | 0              | -2.641931               | 3.215485  | 1.719716  |
| 26               | 8                | 0              | -0.311164               | -0.259185 | 0.794165  |
| 27               | 16               | 0              | -0.380386               | -1.333955 | -0.359980 |
| 28               | 8                | 0              | -0.398021               | -0.751250 | -1.681160 |
| 29               | 8                | 0              | 0.528373                | -2.394573 | 0.006448  |
| 30               | 6                | 0              | -2.078816               | -2.050679 | -0.100250 |
| 31               | 9                | 0              | -2.340492               | -2.166718 | 1.197418  |

|    |   |   |           |           |           |
|----|---|---|-----------|-----------|-----------|
| 32 | 9 | 0 | -3.008517 | -1.298717 | -0.671789 |
| 33 | 9 | 0 | -2.103076 | -3.259824 | -0.655005 |
| 34 | 1 | 0 | -2.635257 | 0.416794  | 1.451447  |

**Transition State of nucleophilic attack of 7a by 5a conjugate base**

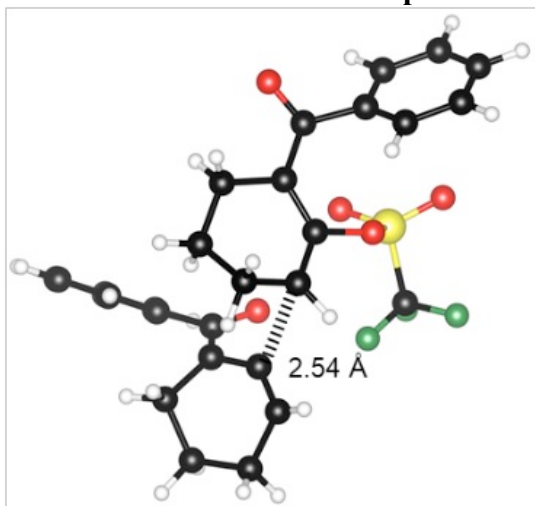

HF (M062X/6-31+G(d,p)) = -2116.44527 Hartrees

Imaginary Frequencies: 1 (-246.41  $\text{cm}^{-1}$ )

Zero-point correction = 0.459692 (Hartree/Particle)

Thermal correction = 0.394413 Hartrees

**Coordinates from last standard orientation:**

| Center Number | Atomic Number | Atomic Type | Coordinates (Angstroms) |           |           |
|---------------|---------------|-------------|-------------------------|-----------|-----------|
|               |               |             | X                       | Y         | Z         |
| 1             | 6             | 0           | -5.640359               | -0.100417 | 0.803922  |
| 2             | 6             | 0           | -6.219205               | -0.659760 | -0.335307 |
| 3             | 6             | 0           | -5.534005               | -1.644960 | -1.047737 |
| 4             | 6             | 0           | -4.279292               | -2.069178 | -0.618163 |
| 5             | 6             | 0           | -3.680756               | -1.496181 | 0.508373  |
| 6             | 6             | 0           | -4.375335               | -0.512791 | 1.218847  |
| 7             | 1             | 0           | -6.174263               | 0.658621  | 1.368371  |
| 8             | 1             | 0           | -7.201208               | -0.332392 | -0.664066 |
| 9             | 1             | 0           | -5.980202               | -2.084304 | -1.935240 |
| 10            | 1             | 0           | -3.746818               | -2.850992 | -1.152216 |
| 11            | 1             | 0           | -3.921123               | -0.074791 | 2.104054  |
| 12            | 6             | 0           | -2.375523               | -2.067755 | 1.003499  |
| 13            | 6             | 0           | -1.296912               | -1.268322 | 1.468731  |
| 14            | 8             | 0           | -2.332299               | -3.324905 | 1.069345  |
| 15            | 6             | 0           | -1.096146               | 0.121266  | 1.316782  |
| 16            | 6             | 0           | -0.178767               | 0.892440  | 1.989220  |
| 17            | 6             | 0           | -0.248668               | -2.026168 | 2.266547  |
| 18            | 6             | 0           | 0.967440                | -1.191729 | 2.664837  |
| 19            | 1             | 0           | 1.527100                | -1.706728 | 3.454068  |
| 20            | 6             | 0           | 0.558357                | 0.213615  | 3.117731  |
| 21            | 1             | 0           | 1.435663                | 0.795745  | 3.414969  |
| 22            | 1             | 0           | -0.726021               | -2.437322 | 3.168277  |

|    |    |   |           |           |           |
|----|----|---|-----------|-----------|-----------|
| 23 | 1  | 0 | 0.071042  | -2.899404 | 1.685624  |
| 24 | 1  | 0 | 1.637440  | -1.085372 | 1.804743  |
| 25 | 1  | 0 | -0.089814 | 0.128897  | 4.005912  |
| 26 | 8  | 0 | -1.984964 | 0.873761  | 0.472576  |
| 27 | 16 | 0 | -1.998516 | 0.763905  | -1.112534 |
| 28 | 8  | 0 | -1.215541 | -0.340894 | -1.605845 |
| 29 | 8  | 0 | -3.353072 | 1.000299  | -1.555392 |
| 30 | 6  | 0 | -1.108110 | 2.339191  | -1.541273 |
| 31 | 9  | 0 | -0.054687 | 2.531888  | -0.773266 |
| 32 | 9  | 0 | -0.733207 | 2.272388  | -2.815505 |
| 33 | 9  | 0 | -1.945356 | 3.364396  | -1.392129 |
| 34 | 6  | 0 | 4.743552  | -2.511395 | -2.674758 |
| 35 | 6  | 0 | 5.210253  | -3.367872 | -1.675915 |
| 36 | 6  | 0 | 4.872417  | -3.132570 | -0.343155 |
| 37 | 6  | 0 | 4.083499  | -2.033507 | -0.007244 |
| 38 | 6  | 0 | 3.613671  | -1.171288 | -1.003850 |
| 39 | 6  | 0 | 3.938693  | -1.425495 | -2.340288 |
| 40 | 1  | 0 | 5.000377  | -2.696468 | -3.713277 |
| 41 | 1  | 0 | 5.829033  | -4.220948 | -1.937008 |
| 42 | 1  | 0 | 5.219795  | -3.806358 | 0.433904  |
| 43 | 1  | 0 | 3.814011  | -1.857233 | 1.030988  |
| 44 | 1  | 0 | 3.550345  | -0.762123 | -3.107085 |
| 45 | 6  | 0 | 2.699943  | -0.020196 | -0.685743 |
| 46 | 6  | 0 | 2.880790  | 0.706179  | 0.569794  |
| 47 | 8  | 0 | 1.801949  | 0.264494  | -1.479880 |
| 48 | 6  | 0 | 2.016167  | 1.658912  | 0.976592  |
| 49 | 6  | 0 | 2.176620  | 2.839513  | 1.540760  |
| 50 | 6  | 0 | 4.195800  | 0.889204  | 1.322891  |
| 51 | 6  | 0 | 4.643391  | 2.347617  | 1.033643  |
| 52 | 1  | 0 | 5.566347  | 2.569502  | 1.581252  |
| 53 | 6  | 0 | 3.579638  | 3.426958  | 1.373646  |
| 54 | 1  | 0 | 3.608323  | 4.226586  | 0.625722  |
| 55 | 1  | 0 | 4.061844  | 0.731603  | 2.399783  |
| 56 | 1  | 0 | 4.971348  | 0.201881  | 0.974897  |
| 57 | 1  | 0 | 4.886700  | 2.400746  | -0.033198 |
| 58 | 1  | 0 | 3.816004  | 3.895891  | 2.336570  |
| 59 | 1  | 0 | 1.482208  | 3.301802  | 2.236470  |
| 60 | 1  | 0 | -0.274125 | 1.968711  | 1.924405  |

-----

**Nucleophilic attack of 7a by 5a conjugate base intermediate**



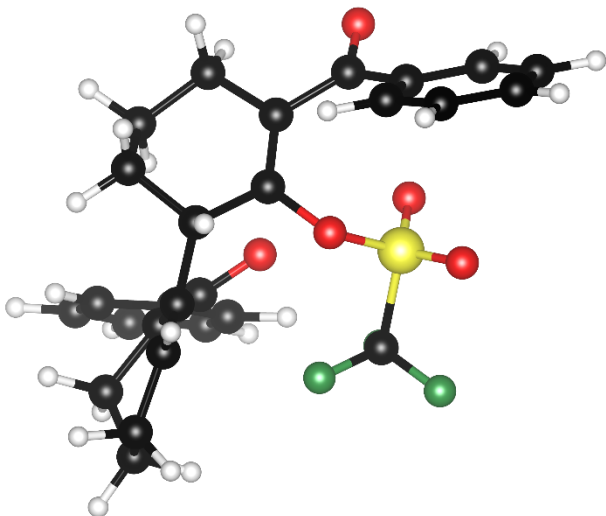

HF (M062X/6-31+G(d,p)) = -2116.542758 Hartrees

Imaginary Frequencies: none found

Zero-point correction = 0.465089 (Hartree/Particle)

Thermal correction = 0.404368 Hartrees

Coordinates from last standard orientation:

| Center<br>Number | Atomic<br>Number | Atomic<br>Type | Coordinates (Angstroms) |           |           |
|------------------|------------------|----------------|-------------------------|-----------|-----------|
|                  |                  |                | X                       | Y         | Z         |
| 1                | 6                | 0              | -5.246041               | -0.916701 | -0.884904 |
| 2                | 6                | 0              | -6.086492               | -0.451381 | 0.125350  |
| 3                | 6                | 0              | -5.775266               | 0.727893  | 0.805672  |
| 4                | 6                | 0              | -4.628044               | 1.440277  | 0.471754  |
| 5                | 6                | 0              | -3.772001               | 0.967797  | -0.528270 |
| 6                | 6                | 0              | -4.086864               | -0.213185 | -1.205815 |
| 7                | 1                | 0              | -5.489866               | -1.828645 | -1.420621 |
| 8                | 1                | 0              | -6.983292               | -1.006427 | 0.383384  |
| 9                | 1                | 0              | -6.427101               | 1.088134  | 1.595444  |
| 10               | 1                | 0              | -4.371031               | 2.360113  | 0.988126  |
| 11               | 1                | 0              | -3.428593               | -0.577890 | -1.989128 |
| 12               | 6                | 0              | -2.573871               | 1.795433  | -0.899557 |
| 13               | 6                | 0              | -1.380702               | 1.149949  | -1.505254 |
| 14               | 8                | 0              | -2.648066               | 3.015618  | -0.815829 |
| 15               | 6                | 0              | -0.870348               | -0.045797 | -1.157693 |
| 16               | 6                | 0              | 0.036628                | -0.893608 | -2.005414 |
| 17               | 6                | 0              | -0.661758               | 1.988942  | -2.540676 |
| 18               | 6                | 0              | 0.676347                | 1.383299  | -2.947388 |
| 19               | 1                | 0              | 1.070642                | 1.908979  | -3.823523 |
| 20               | 6                | 0              | 0.494223                | -0.099189 | -3.252830 |
| 21               | 1                | 0              | 1.422556                | -0.544718 | -3.622476 |
| 22               | 1                | 0              | -1.307030               | 2.117891  | -3.421973 |
| 23               | 1                | 0              | -0.525746               | 2.985157  | -2.106625 |
| 24               | 1                | 0              | 1.395632                | 1.497183  | -2.129774 |
| 25               | 1                | 0              | -0.259580               | -0.207598 | -4.044336 |
| 26               | 8                | 0              | -1.376261               | -0.798916 | -0.083962 |
| 27               | 16               | 0              | -1.532904               | -0.283533 | 1.425486  |
| 28               | 8                | 0              | -1.494510               | 1.152159  | 1.548931  |

|    |   |   |           |           |           |
|----|---|---|-----------|-----------|-----------|
| 29 | 8 | 0 | -2.657591 | -1.042471 | 1.932010  |
| 30 | 6 | 0 | -0.045520 | -1.009654 | 2.338297  |
| 31 | 9 | 0 | 0.675735  | -1.793338 | 1.568130  |
| 32 | 9 | 0 | 0.683390  | -0.049892 | 2.873611  |
| 33 | 9 | 0 | -0.547193 | -1.746291 | 3.335464  |
| 34 | 6 | 0 | 4.457223  | 2.515595  | 1.926993  |
| 35 | 6 | 0 | 5.521924  | 2.724339  | 1.048059  |
| 36 | 6 | 0 | 5.507966  | 2.110882  | -0.205029 |
| 37 | 6 | 0 | 4.445586  | 1.282859  | -0.566948 |
| 38 | 6 | 0 | 3.379222  | 1.052857  | 0.311748  |
| 39 | 6 | 0 | 3.391988  | 1.697233  | 1.554434  |
| 40 | 1 | 0 | 4.455127  | 2.998022  | 2.900629  |
| 41 | 1 | 0 | 6.349318  | 3.367736  | 1.332758  |
| 42 | 1 | 0 | 6.320776  | 2.283847  | -0.904946 |
| 43 | 1 | 0 | 4.430421  | 0.816517  | -1.549260 |
| 44 | 1 | 0 | 2.544873  | 1.547627  | 2.216706  |
| 45 | 6 | 0 | 2.181891  | 0.214273  | -0.071278 |
| 46 | 6 | 0 | 2.351280  | -0.953693 | -0.800026 |
| 47 | 8 | 0 | 1.045675  | 0.677314  | 0.307938  |
| 48 | 6 | 0 | 1.193748  | -1.655161 | -1.356985 |
| 49 | 6 | 0 | 1.218012  | -2.992775 | -1.566450 |
| 50 | 6 | 0 | 3.639267  | -1.745652 | -0.865117 |
| 51 | 6 | 0 | 3.399744  | -3.159487 | -0.312446 |
| 52 | 1 | 0 | 4.332319  | -3.736414 | -0.285382 |
| 53 | 6 | 0 | 2.352591  | -3.894312 | -1.152766 |
| 54 | 1 | 0 | 1.963859  | -4.760419 | -0.600115 |
| 55 | 1 | 0 | 4.005642  | -1.840616 | -1.902786 |
| 56 | 1 | 0 | 4.432118  | -1.261780 | -0.289105 |
| 57 | 1 | 0 | 3.042271  | -3.065786 | 0.720369  |
| 58 | 1 | 0 | 2.828355  | -4.310318 | -2.054107 |
| 59 | 1 | 0 | 0.389467  | -3.465184 | -2.094341 |
| 60 | 1 | 0 | -0.650440 | -1.679011 | -2.358994 |

---

**Endo adduct: Allene 7a with furan (Product 10a)**

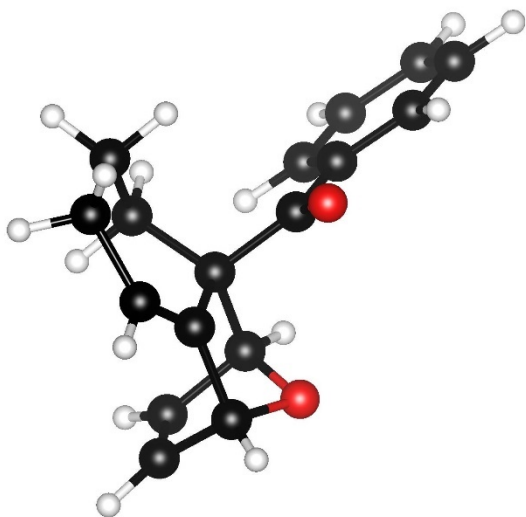

HF (M062X/6-31+G(d,p)) = -807.5321058 Hartrees

Imaginary Frequencies: none found

Zero-point correction = 0.291267 (Hartree/Particle)

Thermal correction = 0.249445 Hartrees

Coordinates from last standard orientation:

| Center<br>Number | Atomic<br>Number | Atomic<br>Type | Coordinates (Angstroms) |           |           |
|------------------|------------------|----------------|-------------------------|-----------|-----------|
|                  |                  |                | X                       | Y         | Z         |
| 1                | 6                | 0              | 0.744316                | -0.016430 | 0.193466  |
| 2                | 6                | 0              | 2.064448                | 0.197928  | -0.532158 |
| 3                | 6                | 0              | 2.796665                | 1.303582  | -0.446941 |
| 4                | 6                | 0              | 0.788984                | 0.792254  | 1.501125  |
| 5                | 6                | 0              | 1.059702                | 2.265409  | 1.153428  |
| 6                | 1                | 0              | 0.229808                | 2.637257  | 0.540903  |
| 7                | 6                | 0              | 2.388021                | 2.477144  | 0.406490  |
| 8                | 1                | 0              | 3.196214                | 2.645128  | 1.131599  |
| 9                | 1                | 0              | -0.138844               | 0.723484  | 2.073585  |
| 10               | 1                | 0              | 1.598710                | 0.389641  | 2.122253  |
| 11               | 1                | 0              | 1.057743                | 2.863130  | 2.069602  |
| 12               | 1                | 0              | 2.336174                | 3.391739  | -0.195599 |
| 13               | 1                | 0              | 3.770123                | 1.351221  | -0.933789 |
| 14               | 6                | 0              | 0.753256                | -1.601546 | 0.204482  |
| 15               | 6                | 0              | 1.952361                | -2.085323 | 1.003739  |
| 16               | 6                | 0              | 3.014221                | -1.849695 | 0.228316  |
| 17               | 6                | 0              | 2.454955                | -1.189670 | -1.034908 |
| 18               | 8                | 0              | 1.178754                | -1.832290 | -1.144704 |
| 19               | 1                | 0              | -0.201092               | -2.091362 | 0.382166  |
| 20               | 1                | 0              | 1.922039                | -2.453656 | 2.021067  |
| 21               | 1                | 0              | 4.066410                | -1.962889 | 0.458288  |
| 22               | 1                | 0              | 3.026189                | -1.258932 | -1.958330 |
| 23               | 6                | 0              | -0.437314               | 0.439319  | -0.680974 |
| 24               | 6                | 0              | -1.854107               | 0.137288  | -0.256853 |
| 25               | 6                | 0              | -2.201069               | -0.508184 | 0.937556  |
| 26               | 6                | 0              | -2.876224               | 0.542182  | -1.126336 |
| 27               | 6                | 0              | -3.538575               | -0.739654 | 1.253264  |
| 28               | 1                | 0              | -1.442369               | -0.837320 | 1.638117  |
| 29               | 6                | 0              | -4.210771               | 0.309362  | -0.813334 |
| 30               | 1                | 0              | -2.602815               | 1.041752  | -2.049571 |
| 31               | 6                | 0              | -4.545314               | -0.333208 | 0.379574  |
| 32               | 1                | 0              | -3.791233               | -1.240317 | 2.182261  |
| 33               | 1                | 0              | -4.990119               | 0.627570  | -1.498416 |
| 34               | 1                | 0              | -5.586374               | -0.517341 | 0.626115  |
| 35               | 8                | 0              | -0.250242               | 1.063085  | -1.709028 |

**Endo Transition State of trapping Allene 7a with furan**

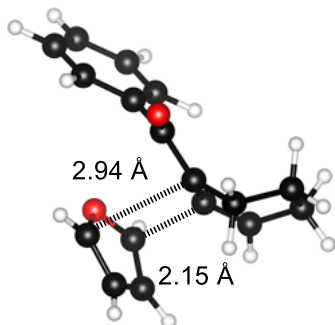

HF (M062X/6-31+G(d,p)) = -807.4666889 Hartrees

Imaginary Frequencies: 1 (-220.31  $\text{cm}^{-1}$ )

Zero-point correction = 0.285996 (Hartree/Particle)

Thermal correction = 0.241535 Hartrees

Coordinates from last standard orientation:

| Center<br>Number | Atomic<br>Number | Atomic<br>Type | Coordinates (Angstroms) |           |           |
|------------------|------------------|----------------|-------------------------|-----------|-----------|
|                  |                  |                | X                       | Y         | Z         |
| 1                | 6                | 0              | -0.989966               | -0.515253 | 0.535537  |
| 2                | 6                | 0              | -1.254066               | -0.060569 | -0.721362 |
| 3                | 6                | 0              | -2.239833               | -0.376770 | -1.552126 |
| 4                | 6                | 0              | -2.278172               | -1.018516 | 1.164126  |
| 5                | 6                | 0              | -2.800859               | -2.131188 | 0.221186  |
| 6                | 1                | 0              | -2.095428               | -2.966739 | 0.282896  |
| 7                | 6                | 0              | -2.950852               | -1.689098 | -1.263207 |
| 8                | 1                | 0              | -4.006746               | -1.517553 | -1.503228 |
| 9                | 1                | 0              | -2.094216               | -1.423717 | 2.161900  |
| 10               | 1                | 0              | -3.009498               | -0.205361 | 1.243877  |
| 11               | 1                | 0              | -3.766021               | -2.503961 | 0.580439  |
| 12               | 1                | 0              | -2.614629               | -2.490904 | -1.929697 |
| 13               | 1                | 0              | -2.633923               | 0.296161  | -2.308495 |
| 14               | 6                | 0              | -0.219918               | 2.277963  | 1.050942  |
| 15               | 6                | 0              | -1.527127               | 2.644096  | 0.832123  |
| 16               | 6                | 0              | -1.749188               | 2.479883  | -0.548944 |
| 17               | 6                | 0              | -0.568580               | 1.949829  | -1.069992 |
| 18               | 8                | 0              | 0.394285                | 1.984629  | -0.108913 |
| 19               | 1                | 0              | 0.397669                | 2.258588  | 1.936955  |
| 20               | 1                | 0              | -2.234196               | 2.957563  | 1.585561  |
| 21               | 1                | 0              | -2.663882               | 2.649465  | -1.097685 |
| 22               | 1                | 0              | -0.214520               | 1.860457  | -2.086373 |
| 23               | 6                | 0              | 0.298114                | -0.863824 | 1.120897  |
| 24               | 6                | 0              | 1.568583                | -0.672664 | 0.339328  |
| 25               | 6                | 0              | 1.651450                | -0.903164 | -1.037048 |
| 26               | 6                | 0              | 2.715584                | -0.288599 | 1.041313  |
| 27               | 6                | 0              | 2.865601                | -0.737822 | -1.702780 |
| 28               | 1                | 0              | 0.773650                | -1.226245 | -1.587462 |
| 29               | 6                | 0              | 3.922948                | -0.104084 | 0.373654  |
| 30               | 1                | 0              | 2.643620                | -0.131426 | 2.113499  |
| 31               | 6                | 0              | 3.999713                | -0.327807 | -1.002187 |
| 32               | 1                | 0              | 2.925877                | -0.931562 | -2.769366 |
| 33               | 1                | 0              | 4.804710                | 0.208857  | 0.924402  |
| 34               | 1                | 0              | 4.941813                | -0.190112 | -1.523956 |
| 35               | 8                | 0              | 0.378856                | -1.311878 | 2.269909  |

---

**Exo adduct: Allene 7a with furan**

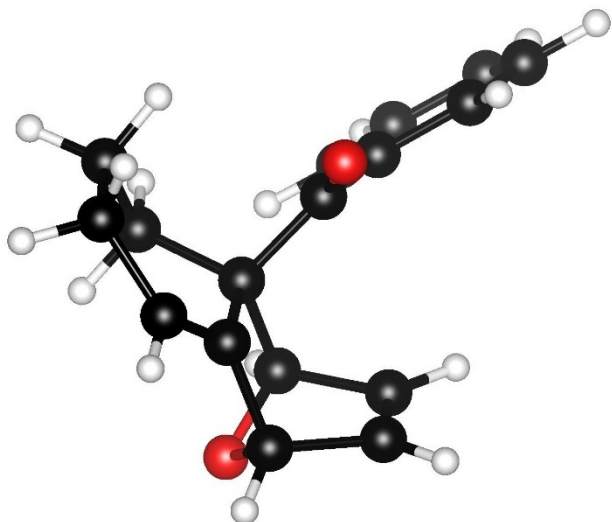

HF (M062X/6-31+G(d,p)) = -807.5325885 Hartrees

Imaginary Frequencies: none found

Zero-point correction = 0.291333 (Hartree/Particle)

Thermal correction = 0.249242 Hartrees

**Coordinates from last standard orientation:**

---

| Center<br>Number | Atomic<br>Number | Atomic<br>Type | Coordinates (Angstroms) |           |           |
|------------------|------------------|----------------|-------------------------|-----------|-----------|
|                  |                  |                | X                       | Y         | Z         |
| 1                | 6                | 0              | -0.838630               | -0.052633 | 0.355645  |
| 2                | 6                | 0              | -2.151193               | 0.237645  | -0.358007 |
| 3                | 6                | 0              | -3.079196               | -0.680728 | -0.603491 |
| 4                | 6                | 0              | -1.121712               | -1.174373 | 1.377187  |
| 5                | 6                | 0              | -1.662688               | -2.411709 | 0.644161  |
| 6                | 1                | 0              | -0.865080               | -2.819513 | 0.015680  |
| 7                | 6                | 0              | -2.909313               | -2.128357 | -0.222991 |
| 8                | 1                | 0              | -3.815335               | -2.420872 | 0.322748  |
| 9                | 1                | 0              | -0.224614               | -1.453200 | 1.939279  |
| 10               | 1                | 0              | -1.857612               | -0.788542 | 2.091871  |
| 11               | 1                | 0              | -1.901065               | -3.185925 | 1.379464  |
| 12               | 1                | 0              | -2.888227               | -2.759091 | -1.119681 |
| 13               | 1                | 0              | -4.044120               | -0.378048 | -1.008091 |
| 14               | 6                | 0              | -2.313985               | 1.748206  | -0.269832 |
| 15               | 6                | 0              | -1.166800               | 2.422208  | -1.010687 |
| 16               | 6                | 0              | -0.082443               | 2.228745  | -0.254468 |
| 17               | 6                | 0              | -0.569368               | 1.399950  | 0.932745  |
| 18               | 8                | 0              | -1.896048               | 1.903590  | 1.103572  |
| 19               | 1                | 0              | -3.321494               | 2.130580  | -0.424093 |
| 20               | 1                | 0              | -1.239228               | 2.878972  | -1.989525 |
| 21               | 1                | 0              | 0.947432                | 2.488633  | -0.465774 |
| 22               | 1                | 0              | -0.018400               | 1.463249  | 1.869085  |
| 23               | 6                | 0              | 0.257465                | -0.517575 | -0.611457 |
| 24               | 8                | 0              | -0.028861               | -1.036189 | -1.675606 |

|    |   |   |          |           |           |
|----|---|---|----------|-----------|-----------|
| 25 | 6 | 0 | 1.705526 | -0.358902 | -0.236617 |
| 26 | 6 | 0 | 2.144893 | -0.153283 | 1.076292  |
| 27 | 6 | 0 | 2.648922 | -0.421234 | -1.270533 |
| 28 | 6 | 0 | 3.504850 | -0.015134 | 1.349390  |
| 29 | 1 | 0 | 1.441218 | -0.117029 | 1.899825  |
| 30 | 6 | 0 | 4.004244 | -0.268656 | -0.999919 |
| 31 | 1 | 0 | 2.298723 | -0.581772 | -2.285067 |
| 32 | 6 | 0 | 4.434950 | -0.066275 | 0.312864  |
| 33 | 1 | 0 | 3.835314 | 0.132928  | 2.372383  |
| 34 | 1 | 0 | 4.725735 | -0.307344 | -1.809823 |
| 35 | 1 | 0 | 5.492908 | 0.050395  | 0.526302  |

### Exo Transition State of trapping Allene 7a with furan

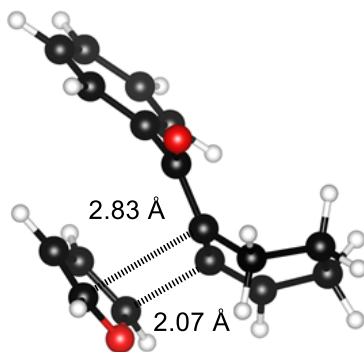

HF (M062X/6-31+G(d,p)) = -807.4635917 Hartrees

Imaginary Frequencies: 1 (-319.25  $\text{cm}^{-1}$ )

Zero-point correction = 0.286041 (Hartree/Particle)

Thermal correction = 0.241415 Hartrees

Coordinates from last standard orientation:

| Center Number | Atomic Number | Atomic Type | Coordinates (Angstroms) |           |           |
|---------------|---------------|-------------|-------------------------|-----------|-----------|
|               |               |             | X                       | Y         | Z         |
| 1             | 6             | 0           | -1.092323               | -0.337278 | 0.548023  |
| 2             | 6             | 0           | -1.306412               | 0.042537  | -0.752843 |
| 3             | 6             | 0           | -2.243679               | -0.363840 | -1.599571 |
| 4             | 6             | 0           | -2.410997               | -0.764743 | 1.165323  |
| 5             | 6             | 0           | -2.897282               | -1.956451 | 0.301484  |
| 6             | 1             | 0           | -2.194394               | -2.781217 | 0.462435  |
| 7             | 6             | 0           | -2.985924               | -1.637520 | -1.217318 |
| 8             | 1             | 0           | -4.030666               | -1.474147 | -1.507326 |
| 9             | 1             | 0           | -2.279055               | -1.076668 | 2.203834  |
| 10            | 1             | 0           | -3.136761               | 0.055300  | 1.130198  |
| 11            | 1             | 0           | -3.875880               | -2.301411 | 0.652747  |
| 12            | 1             | 0           | -2.640009               | -2.497999 | -1.801054 |
| 13            | 1             | 0           | -2.600397               | 0.221133  | -2.442780 |
| 14            | 6             | 0           | -0.895237               | 2.044823  | -1.096767 |
| 15            | 6             | 0           | 0.470341                | 2.141729  | -0.814780 |
| 16            | 6             | 0           | 0.568258                | 2.329408  | 0.568073  |
| 17            | 6             | 0           | -0.729717               | 2.425768  | 1.034294  |
| 18            | 8             | 0           | -1.601763               | 2.427548  | 0.018398  |
| 19            | 1             | 0           | -1.416988               | 2.164738  | -2.035589 |

|    |   |   |           |           |           |
|----|---|---|-----------|-----------|-----------|
| 20 | 1 | 0 | 1.271498  | 1.970181  | -1.519535 |
| 21 | 1 | 0 | 1.461432  | 2.345675  | 1.174898  |
| 22 | 1 | 0 | -1.136553 | 2.593297  | 2.020794  |
| 23 | 6 | 0 | 0.158322  | -0.766746 | 1.159913  |
| 24 | 8 | 0 | 0.197884  | -1.175243 | 2.326243  |
| 25 | 6 | 0 | 1.444826  | -0.718135 | 0.380996  |
| 26 | 6 | 0 | 1.520275  | -1.042911 | -0.976744 |
| 27 | 6 | 0 | 2.615678  | -0.381728 | 1.070218  |
| 28 | 6 | 0 | 2.748730  | -1.013214 | -1.638063 |
| 29 | 1 | 0 | 0.624241  | -1.329582 | -1.517095 |
| 30 | 6 | 0 | 3.836799  | -0.328415 | 0.405972  |
| 31 | 1 | 0 | 2.550084  | -0.152829 | 2.130083  |
| 32 | 6 | 0 | 3.905114  | -0.643255 | -0.953506 |
| 33 | 1 | 0 | 2.800068  | -1.278798 | -2.689532 |
| 34 | 1 | 0 | 4.735973  | -0.047777 | 0.945751  |
| 35 | 1 | 0 | 4.857803  | -0.608504 | -1.473170 |

**Endo adduct: Allene 7d with furan (product 10d)**

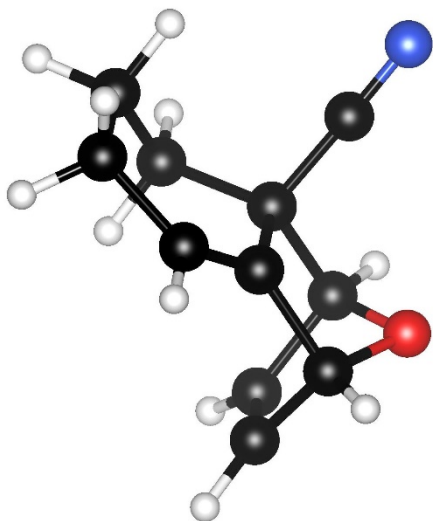

HF (M062X/6-31+G(d,p)) = -555.4920351 Hartrees

Imaginary Frequencies: none found

Zero-point correction = 0.198464 (Hartree/Particle)

Thermal correction = 0.163567 Hartrees

Coordinates from last standard orientation:

| Center<br>Number | Atomic<br>Number | Atomic<br>Type | Coordinates (Angstroms) |           |           |
|------------------|------------------|----------------|-------------------------|-----------|-----------|
|                  |                  |                | X                       | Y         | Z         |
| 1                | 6                | 0              | 0.122434                | 0.543609  | 0.311199  |
| 2                | 6                | 0              | -0.051780               | -0.546725 | -0.745279 |
| 3                | 6                | 0              | 0.905111                | -1.415976 | -1.054729 |
| 4                | 6                | 0              | 1.113239                | 0.069920  | 1.379508  |
| 5                | 6                | 0              | 2.428059                | -0.312516 | 0.683655  |
| 6                | 1                | 0              | 2.844607                | 0.586333  | 0.215062  |
| 7                | 6                | 0              | 2.252181                | -1.415879 | -0.375553 |
| 8                | 1                | 0              | 2.366044                | -2.402543 | 0.093131  |

|    |   |   |           |           |           |
|----|---|---|-----------|-----------|-----------|
| 9  | 1 | 0 | 1.285944  | 0.847185  | 2.129983  |
| 10 | 1 | 0 | 0.670053  | -0.800299 | 1.877263  |
| 11 | 1 | 0 | 3.157423  | -0.639378 | 1.429877  |
| 12 | 1 | 0 | 3.054582  | -1.348532 | -1.118683 |
| 13 | 1 | 0 | 0.696183  | -2.224677 | -1.753464 |
| 14 | 6 | 0 | 0.618444  | 1.783889  | -0.311558 |
| 15 | 7 | 0 | 1.020682  | 2.769897  | -0.765506 |
| 16 | 6 | 0 | -1.400994 | 0.789803  | 0.656298  |
| 17 | 6 | 0 | -1.965114 | -0.487714 | 1.250720  |
| 18 | 6 | 0 | -2.080181 | -1.335146 | 0.224665  |
| 19 | 6 | 0 | -1.559891 | -0.573047 | -0.995827 |
| 20 | 8 | 0 | -1.936802 | 0.771482  | -0.670223 |
| 21 | 1 | 0 | -1.611569 | 1.733655  | 1.156189  |
| 22 | 1 | 0 | -2.138218 | -0.666579 | 2.303752  |
| 23 | 1 | 0 | -2.355350 | -2.382410 | 0.232069  |
| 24 | 1 | 0 | -1.909110 | -0.865197 | -1.983443 |

### Endo Transition State of trapping Allene 7d with furan

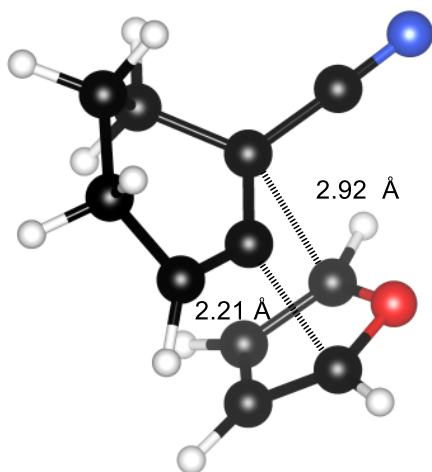

HF (M062X/6-31+G(d,p)) = -555.418494 Hartrees

Imaginary Frequencies: 1 (-169.42  $\text{cm}^{-1}$ )

Zero-point correction = 0.193221 (Hartree/Particle)

Thermal correction = 0.155483 Hartrees

Coordinates from last standard orientation:

| Center Number | Atomic Number | Atomic Type | Coordinates (Angstroms) |           |           |
|---------------|---------------|-------------|-------------------------|-----------|-----------|
|               |               |             | X                       | Y         | Z         |
| 1             | 6             | 0           | 0.539695                | 0.697469  | 0.133582  |
| 2             | 6             | 0           | 0.385088                | -0.425921 | -0.606588 |
| 3             | 6             | 0           | 1.188090                | -1.468546 | -0.757406 |
| 4             | 6             | 0           | 1.587837                | 0.479760  | 1.219605  |
| 5             | 6             | 0           | 2.867385                | 0.015495  | 0.480220  |
| 6             | 1             | 0           | 3.213239                | 0.854401  | -0.132947 |
| 7             | 6             | 0           | 2.653311                | -1.231781 | -0.416619 |
| 8             | 1             | 0           | 2.977961                | -2.136305 | 0.112179  |
| 9             | 1             | 0           | 1.784087                | 1.394911  | 1.784445  |
| 10            | 1             | 0           | 1.240030                | -0.289834 | 1.917472  |



|    |   |   |           |           |           |
|----|---|---|-----------|-----------|-----------|
| 11 | 1 | 0 | 3.659881  | -0.198317 | 1.205142  |
| 12 | 1 | 0 | 3.276085  | -1.164027 | -1.314694 |
| 13 | 1 | 0 | 0.841877  | -2.476334 | -0.969327 |
| 14 | 6 | 0 | 0.231129  | 2.007043  | -0.326714 |
| 15 | 7 | 0 | -0.016169 | 3.093479  | -0.662655 |
| 16 | 6 | 0 | -2.321745 | 0.448869  | 0.664644  |
| 17 | 6 | 0 | -2.132070 | -0.770165 | 1.265920  |
| 18 | 6 | 0 | -1.792780 | -1.666663 | 0.229928  |
| 19 | 6 | 0 | -1.743159 | -0.909500 | -0.933529 |
| 20 | 8 | 0 | -2.199450 | 0.346113  | -0.673580 |
| 21 | 1 | 0 | -2.603632 | 1.419784  | 1.043857  |
| 22 | 1 | 0 | -2.200325 | -0.974199 | 2.323979  |
| 23 | 1 | 0 | -1.550517 | -2.715999 | 0.313016  |
| 24 | 1 | 0 | -1.706590 | -1.193691 | -1.974148 |

**Exo adduct: Allene 7d with furan**

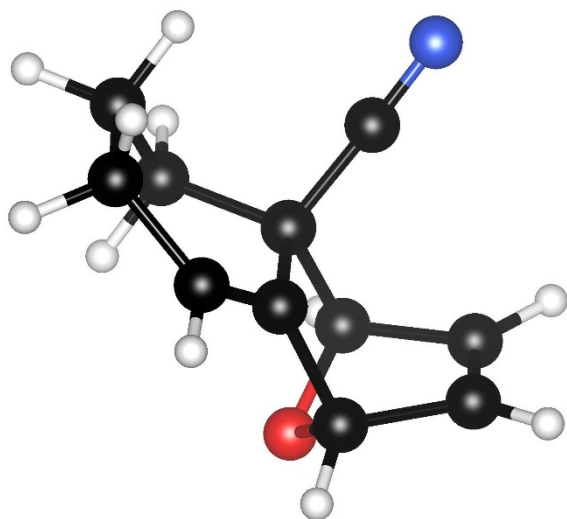

HF (M062X/6-31+G(d,p)) = -555.4903071 Hartrees

Imaginary Frequencies: none found

Zero-point correction = 0.198513 (Hartree/Particle)

Thermal correction = 0.163509 Hartrees

Coordinates from last standard orientation:

| Center Number | Atomic Number | Atomic Type | Coordinates (Angstroms) |           |           |
|---------------|---------------|-------------|-------------------------|-----------|-----------|
|               |               |             | X                       | Y         | Z         |
| 1             | 6             | 0           | 0.080344                | 0.458595  | 0.366062  |
| 2             | 6             | 0           | 0.060630                | -0.808984 | -0.493622 |
| 3             | 6             | 0           | 1.167935                | -1.435528 | -0.878526 |
| 4             | 6             | 0           | 1.308637                | 0.385707  | 1.286924  |
| 5             | 6             | 0           | 2.566616                | 0.276320  | 0.413620  |
| 6             | 1             | 0           | 2.658542                | 1.198403  | -0.170971 |
| 7             | 6             | 0           | 2.549868                | -0.942589 | -0.532883 |
| 8             | 1             | 0           | 3.067198                | -1.786982 | -0.060077 |
| 9             | 1             | 0           | 1.363644                | 1.270913  | 1.928349  |
| 10            | 1             | 0           | 1.188586                | -0.497259 | 1.923993  |

|    |   |   |           |           |           |
|----|---|---|-----------|-----------|-----------|
| 11 | 1 | 0 | 3.452808  | 0.226597  | 1.052176  |
| 12 | 1 | 0 | 3.120344  | -0.719123 | -1.441439 |
| 13 | 1 | 0 | 1.089551  | -2.405760 | -1.366402 |
| 14 | 6 | 0 | 0.156165  | 1.694122  | -0.431053 |
| 15 | 7 | 0 | 0.238730  | 2.683132  | -1.027248 |
| 16 | 6 | 0 | -1.350393 | -1.358749 | -0.316940 |
| 17 | 6 | 0 | -2.350205 | -0.366974 | -0.893221 |
| 18 | 6 | 0 | -2.363307 | 0.666332  | -0.048239 |
| 19 | 6 | 0 | -1.350138 | 0.311603  | 1.034257  |
| 20 | 8 | 0 | -1.476820 | -1.105695 | 1.100069  |
| 21 | 1 | 0 | -1.478202 | -2.415537 | -0.543266 |
| 22 | 1 | 0 | -2.854190 | -0.472222 | -1.845226 |
| 23 | 1 | 0 | -2.875701 | 1.615019  | -0.142226 |
| 24 | 1 | 0 | -1.446043 | 0.770459  | 2.016995  |

### Exo Transition State of trapping Allene 7d with furan

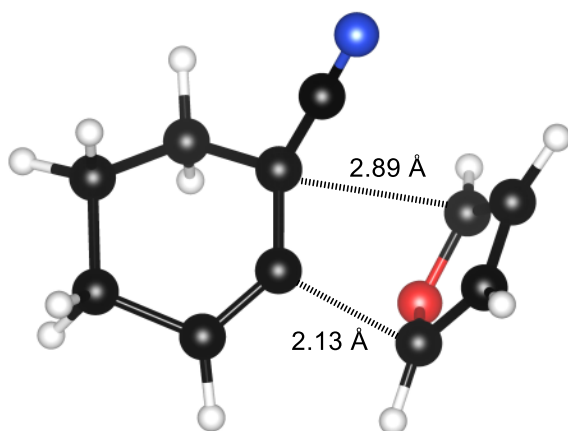

HF (M062X/6-31+G(d,p)) = -555.4154051 Hartrees

Imaginary Frequencies: 1 (-246.36  $\text{cm}^{-1}$ )

Zero-point correction = 0.193484 (Hartree/Particle)

Thermal correction = 0.155726 Hartrees

Coordinates from last standard orientation:

| Center Number | Atomic Number | Atomic Type | Coordinates (Angstroms) |           |           |
|---------------|---------------|-------------|-------------------------|-----------|-----------|
|               |               |             | X                       | Y         | Z         |
| 1             | 6             | 0           | 0.478373                | 0.634822  | 0.197273  |
| 2             | 6             | 0           | 0.405666                | -0.543898 | -0.481896 |
| 3             | 6             | 0           | 1.330107                | -1.467011 | -0.694209 |
| 4             | 6             | 0           | 1.636093                | 0.604811  | 1.187270  |
| 5             | 6             | 0           | 2.895982                | 0.280338  | 0.346034  |
| 6             | 1             | 0           | 3.061289                | 1.121995  | -0.335525 |
| 7             | 6             | 0           | 2.774783                | -1.032077 | -0.466335 |
| 8             | 1             | 0           | 3.244554                | -1.857278 | 0.082756  |
| 9             | 1             | 0           | 1.755052                | 1.560838  | 1.703879  |
| 10            | 1             | 0           | 1.461049                | -0.174161 | 1.936651  |
| 11            | 1             | 0           | 3.775234                | 0.220456  | 0.996419  |
| 12            | 1             | 0           | 3.322165                | -0.942123 | -1.410664 |

|    |   |   |           |           |           |
|----|---|---|-----------|-----------|-----------|
| 13 | 1 | 0 | 1.120331  | -2.517750 | -0.873675 |
| 14 | 6 | 0 | 0.063914  | 1.874413  | -0.365107 |
| 15 | 7 | 0 | -0.264594 | 2.903157  | -0.799945 |
| 16 | 6 | 0 | -1.538775 | -1.417382 | -0.429863 |
| 17 | 6 | 0 | -2.266933 | -0.388187 | -1.021765 |
| 18 | 6 | 0 | -2.616010 | 0.487962  | 0.016885  |
| 19 | 6 | 0 | -2.147157 | -0.089415 | 1.177807  |
| 20 | 8 | 0 | -1.623006 | -1.300206 | 0.929050  |
| 21 | 1 | 0 | -1.273722 | -2.397567 | -0.798454 |
| 22 | 1 | 0 | -2.421976 | -0.257463 | -2.082920 |
| 23 | 1 | 0 | -3.102180 | 1.448784  | -0.062147 |
| 24 | 1 | 0 | -2.201854 | 0.207559  | 2.214332  |

**Endo adduct: Allene 7d with furan (product 11d)**

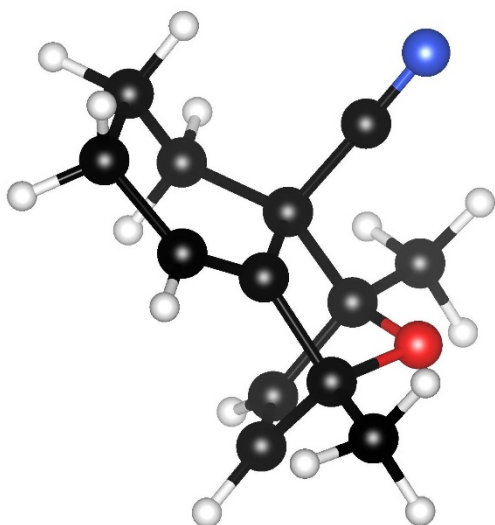

HF (M062X/6-31+G(d,p)) = -634.1012137 Hartrees

Imaginary Frequencies: none found

Zero-point correction = 0.253023 (Hartree/Particle)

Thermal correction = 0.214982 Hartrees

Coordinates from last standard orientation:

| Center Number | Atomic Number | Atomic Type | Coordinates (Angstroms) |           |           |
|---------------|---------------|-------------|-------------------------|-----------|-----------|
|               |               |             | X                       | Y         | Z         |
| 1             | 6             | 0           | -0.418403               | 0.592198  | -0.046332 |
| 2             | 6             | 0           | -0.195981               | -0.884169 | 0.267427  |
| 3             | 6             | 0           | -1.163404               | -1.793812 | 0.197707  |
| 4             | 6             | 0           | -1.541297               | 0.738941  | -1.078373 |
| 5             | 6             | 0           | -2.796549               | 0.039542  | -0.534916 |
| 6             | 1             | 0           | -3.116469               | 0.562264  | 0.373539  |
| 7             | 6             | 0           | -2.571399               | -1.451770 | -0.223425 |
| 8             | 1             | 0           | -2.785681               | -2.053661 | -1.116886 |
| 9             | 1             | 0           | -1.749698               | 1.793025  | -1.287888 |
| 10            | 1             | 0           | -1.202032               | 0.262096  | -2.005429 |
| 11            | 1             | 0           | -3.613807               | 0.139995  | -1.254411 |
| 12            | 1             | 0           | -3.288746               | -1.785644 | 0.534652  |

|    |   |   |           |           |           |
|----|---|---|-----------|-----------|-----------|
| 13 | 1 | 0 | -0.929984 | -2.846941 | 0.350353  |
| 14 | 6 | 0 | 1.074820  | 1.003356  | -0.402862 |
| 15 | 6 | 0 | 1.476607  | 0.195282  | -1.630318 |
| 16 | 6 | 0 | 1.653566  | -1.056277 | -1.203771 |
| 17 | 6 | 0 | 1.328207  | -1.040299 | 0.294957  |
| 18 | 8 | 0 | 1.744979  | 0.290369  | 0.646499  |
| 19 | 1 | 0 | 1.519339  | 0.587371  | -2.639331 |
| 20 | 1 | 0 | 1.860960  | -1.953532 | -1.775657 |
| 21 | 6 | 0 | 1.397329  | 2.474279  | -0.396894 |
| 22 | 1 | 0 | 0.812659  | 2.985485  | -1.167384 |
| 23 | 1 | 0 | 1.167205  | 2.919518  | 0.573933  |
| 24 | 1 | 0 | 2.458472  | 2.620136  | -0.611721 |
| 25 | 6 | 0 | 1.932069  | -2.091193 | 1.185544  |
| 26 | 1 | 0 | 1.572600  | -3.080781 | 0.890502  |
| 27 | 1 | 0 | 3.021219  | -2.077401 | 1.098909  |
| 28 | 1 | 0 | 1.649509  | -1.910956 | 2.225386  |
| 29 | 6 | 0 | -0.786386 | 1.311323  | 1.186749  |
| 30 | 7 | 0 | -1.095778 | 1.898811  | 2.135211  |

### Endo Transition State of trapping Allene 7d with 2,5-Dimethylfuran

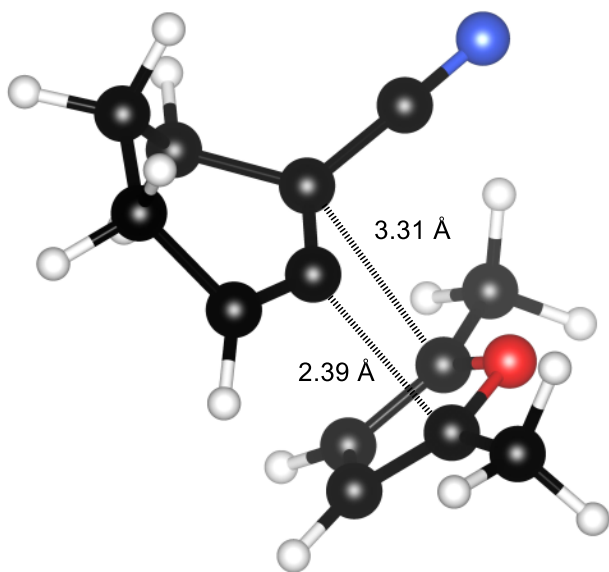

HF (M062X/6-31+G(d,p)) = -634.0288778 Hartrees

Imaginary Frequencies: 1 (-96.31  $\text{cm}^{-1}$ )

Zero-point correction = 0.248618 (Hartree/Particle)

Thermal correction = 0.207040 Hartrees

Coordinates from last standard orientation:

| Center Number | Atomic Number | Atomic Type | Coordinates (Angstroms) |           |           |
|---------------|---------------|-------------|-------------------------|-----------|-----------|
|               |               |             | X                       | Y         | Z         |
| 1             | 6             | 0           | 0.863545                | 0.779100  | -0.104968 |
| 2             | 6             | 0           | 0.839061                | -0.552644 | -0.290249 |
| 3             | 6             | 0           | 1.737674                | -1.486556 | -0.035038 |
| 4             | 6             | 0           | 1.932726                | 1.147064  | 0.920702  |

|    |   |   |           |           |           |
|----|---|---|-----------|-----------|-----------|
| 5  | 6 | 0 | 3.252454  | 0.539265  | 0.377966  |
| 6  | 1 | 0 | 3.513172  | 1.088345  | -0.532607 |
| 7  | 6 | 0 | 3.174795  | -0.981137 | 0.064060  |
| 8  | 1 | 0 | 3.630025  | -1.557754 | 0.877934  |
| 9  | 1 | 0 | 2.031182  | 2.229727  | 1.036272  |
| 10 | 1 | 0 | 1.674258  | 0.717525  | 1.894105  |
| 11 | 1 | 0 | 4.060238  | 0.711643  | 1.096907  |
| 12 | 1 | 0 | 3.754737  | -1.209901 | -0.835650 |
| 13 | 1 | 0 | 1.501093  | -2.506439 | 0.254682  |
| 14 | 6 | 0 | -2.072493 | 0.492387  | 0.630898  |
| 15 | 6 | 0 | -1.705128 | -0.341782 | 1.654286  |
| 16 | 6 | 0 | -1.289477 | -1.558190 | 1.054086  |
| 17 | 6 | 0 | -1.398377 | -1.383342 | -0.311092 |
| 18 | 8 | 0 | -1.945531 | -0.157676 | -0.554663 |
| 19 | 1 | 0 | -1.713459 | -0.089497 | 2.704858  |
| 20 | 1 | 0 | -0.921650 | -2.448726 | 1.544238  |
| 21 | 6 | 0 | -2.632664 | 1.867448  | 0.585634  |
| 22 | 1 | 0 | -2.637010 | 2.293453  | 1.590090  |
| 23 | 1 | 0 | -2.037346 | 2.507286  | -0.073233 |
| 24 | 1 | 0 | -3.659277 | 1.853860  | 0.206717  |
| 25 | 6 | 0 | -1.329702 | -2.328417 | -1.460813 |
| 26 | 1 | 0 | -0.661218 | -3.156097 | -1.214634 |
| 27 | 1 | 0 | -2.319562 | -2.738112 | -1.685747 |
| 28 | 1 | 0 | -0.948828 | -1.825186 | -2.351998 |
| 29 | 6 | 0 | 0.376618  | 1.733172  | -1.039017 |
| 30 | 7 | 0 | -0.028043 | 2.547582  | -1.764766 |

---

**Exo adduct: Allene 7d with 2,5-Dimethylfuran**

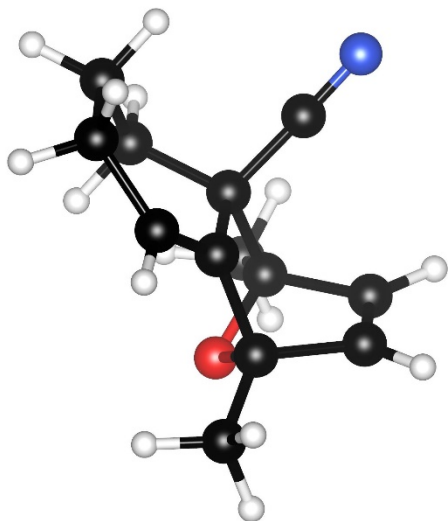

HF (M062X/6-31+G(d,p)) = -634.0999192 Hartrees

Imaginary Frequencies: none found

Zero-point correction = 0.253326 (Hartree/Particle)

Thermal correction = 0.215371 Hartrees

Coordinates from last standard orientation:

---

| Center | Atomic | Atomic | Coordinates (Angstroms) |
|--------|--------|--------|-------------------------|
|--------|--------|--------|-------------------------|

| Number | Number | Type | X         | Y         | Z         |
|--------|--------|------|-----------|-----------|-----------|
| 1      | 6      | 0    | 0.418169  | -0.574431 | -0.044512 |
| 2      | 6      | 0    | 0.178000  | 0.894989  | 0.302860  |
| 3      | 6      | 0    | 1.150467  | 1.801296  | 0.304283  |
| 4      | 6      | 0    | 1.549954  | -0.634885 | -1.083603 |
| 5      | 6      | 0    | 2.804359  | 0.008671  | -0.474720 |
| 6      | 1      | 0    | 3.123510  | -0.602943 | 0.376172  |
| 7      | 6      | 0    | 2.584807  | 1.465701  | -0.016204 |
| 8      | 1      | 0    | 2.891573  | 2.155956  | -0.812339 |
| 9      | 1      | 0    | 1.758734  | -1.669619 | -1.374350 |
| 10     | 1      | 0    | 1.213276  | -0.086082 | -1.970144 |
| 11     | 1      | 0    | 3.620844  | -0.023285 | -1.201329 |
| 12     | 1      | 0    | 3.235052  | 1.692836  | 0.836248  |
| 13     | 1      | 0    | 0.902565  | 2.854356  | 0.429213  |
| 14     | 6      | 0    | 0.806128  | -1.391792 | 1.117215  |
| 15     | 7      | 0    | 1.133444  | -2.062063 | 2.002943  |
| 16     | 6      | 0    | -1.330452 | 1.092958  | 0.135526  |
| 17     | 6      | 0    | -2.034761 | 0.219486  | 1.169596  |
| 18     | 6      | 0    | -1.880039 | -1.040171 | 0.761320  |
| 19     | 6      | 0    | -1.052405 | -0.962318 | -0.521327 |
| 20     | 8      | 0    | -1.487176 | 0.287534  | -1.058701 |
| 21     | 1      | 0    | -2.482710 | 0.590534  | 2.083769  |
| 22     | 1      | 0    | -2.164581 | -1.959317 | 1.259572  |
| 23     | 6      | 0    | -1.153839 | -2.087112 | -1.515418 |
| 24     | 1      | 0    | -0.745150 | -3.005486 | -1.083123 |
| 25     | 1      | 0    | -2.200573 | -2.260511 | -1.776276 |
| 26     | 1      | 0    | -0.596108 | -1.848628 | -2.424499 |
| 27     | 6      | 0    | -1.828650 | 2.498811  | -0.063118 |
| 28     | 1      | 0    | -2.902024 | 2.488250  | -0.266205 |
| 29     | 1      | 0    | -1.651192 | 3.088036  | 0.841039  |
| 30     | 1      | 0    | -1.310351 | 2.972859  | -0.900127 |

**Exo adduct: Allene 7d with 2,5-Dimethylfuran**

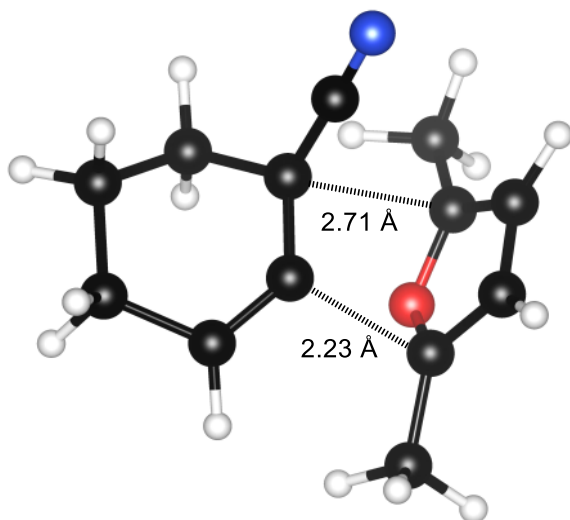

HF (M062X/6-31+G(d,p)) = -634.0238716 Hartrees  
 Imaginary Frequencies: 1 (-219.99  $\text{cm}^{-1}$ )  
 Zero-point correction = 0.248736 (Hartree/Particle)

Thermal correction = 0.207336 Hartrees

Coordinates from last standard orientation:

| Center<br>Number | Atomic<br>Number | Atomic<br>Type | Coordinates (Angstroms) |           |           |
|------------------|------------------|----------------|-------------------------|-----------|-----------|
|                  |                  |                | X                       | Y         | Z         |
| 1                | 6                | 0              | 0.776296                | -0.688298 | 0.131309  |
| 2                | 6                | 0              | 0.652614                | 0.633726  | 0.442204  |
| 3                | 6                | 0              | 1.497436                | 1.630271  | 0.238847  |
| 4                | 6                | 0              | 1.751073                | -0.870963 | -1.023771 |
| 5                | 6                | 0              | 3.081522                | -0.236002 | -0.543964 |
| 6                | 1                | 0              | 3.452941                | -0.846998 | 0.285818  |
| 7                | 6                | 0              | 2.937746                | 1.236755  | -0.085843 |
| 8                | 1                | 0              | 3.251385                | 1.911620  | -0.891484 |
| 9                | 1                | 0              | 1.898203                | -1.924460 | -1.278017 |
| 10               | 1                | 0              | 1.370754                | -0.350019 | -1.909727 |
| 11               | 1                | 0              | 3.830638                | -0.292967 | -1.340900 |
| 12               | 1                | 0              | 3.608371                | 1.434823  | 0.756998  |
| 13               | 1                | 0              | 1.217695                | 2.674869  | 0.145266  |
| 14               | 6                | 0              | 0.653639                | -1.725072 | 1.099010  |
| 15               | 7                | 0              | 0.567645                | -2.598049 | 1.864392  |
| 16               | 6                | 0              | -1.469629               | 1.276308  | 0.259228  |
| 17               | 6                | 0              | -1.942173               | 0.430436  | 1.263667  |
| 18               | 6                | 0              | -2.145726               | -0.822017 | 0.672657  |
| 19               | 6                | 0              | -1.818947               | -0.683980 | -0.665258 |
| 20               | 8                | 0              | -1.557603               | 0.611902  | -0.937038 |
| 21               | 1                | 0              | -2.036002               | 0.698846  | 2.306692  |
| 22               | 1                | 0              | -2.415140               | -1.749303 | 1.157141  |
| 23               | 6                | 0              | -1.854763               | -1.627648 | -1.812420 |
| 24               | 1                | 0              | -1.938231               | -2.650313 | -1.441498 |
| 25               | 1                | 0              | -2.710946               | -1.419496 | -2.462095 |
| 26               | 1                | 0              | -0.942558               | -1.540883 | -2.408867 |
| 27               | 6                | 0              | -1.426187               | 2.765348  | 0.190616  |
| 28               | 1                | 0              | -2.436302               | 3.171083  | 0.083076  |
| 29               | 1                | 0              | -0.990129               | 3.166704  | 1.108171  |
| 30               | 1                | 0              | -0.830791               | 3.094443  | -0.662715 |

**Endo adduct: Allene 7d with furan (product 10d)**

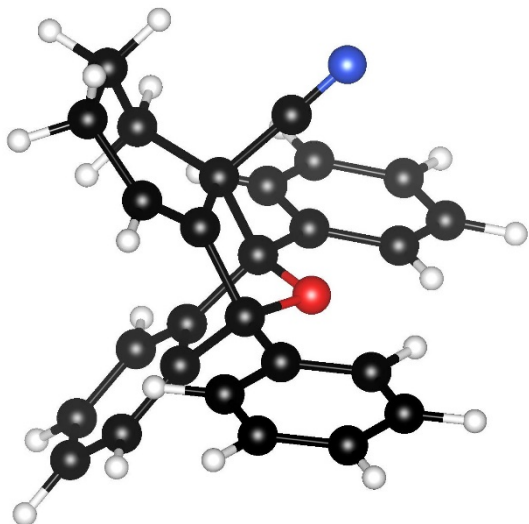

HF (M062X/6-31+G(d,p)) = -1171.047106 Hartrees

Imaginary Frequencies: none found

Zero-point correction = 0.408415 (Hartree/Particle)

Thermal correction = 0.357823 Hartrees

Coordinates from last standard orientation:

| Center<br>Number | Atomic<br>Number | Atomic<br>Type | Coordinates (Angstroms) |           |           |
|------------------|------------------|----------------|-------------------------|-----------|-----------|
|                  |                  |                | X                       | Y         | Z         |
| 1                | 6                | 0              | 0.715365                | 0.721605  | 1.117374  |
| 2                | 6                | 0              | -0.803002               | 0.829933  | 0.998185  |
| 3                | 6                | 0              | -1.506277               | 1.797889  | 1.575774  |
| 4                | 6                | 0              | 1.323683                | 2.117200  | 1.297870  |
| 5                | 6                | 0              | 0.659526                | 2.784551  | 2.511348  |
| 6                | 1                | 0              | 0.905033                | 2.198582  | 3.404090  |
| 7                | 6                | 0              | -0.866596               | 2.905037  | 2.374210  |
| 8                | 1                | 0              | -1.123301               | 3.843272  | 1.863949  |
| 9                | 1                | 0              | 2.405271                | 2.057524  | 1.450024  |
| 10               | 1                | 0              | 1.129529                | 2.686730  | 0.381014  |
| 11               | 1                | 0              | 1.091787                | 3.777250  | 2.662540  |
| 12               | 1                | 0              | -1.327244               | 2.972580  | 3.365863  |
| 13               | 1                | 0              | -2.579005               | 1.867475  | 1.406702  |
| 14               | 6                | 0              | 1.011374                | -0.148158 | -0.176738 |
| 15               | 6                | 0              | 0.574923                | 0.649201  | -1.399622 |
| 16               | 6                | 0              | -0.823548               | 0.609342  | -1.389812 |
| 17               | 6                | 0              | -1.180164               | -0.163504 | -0.115006 |
| 18               | 8                | 0              | -0.073152               | -1.082768 | -0.058252 |
| 19               | 6                | 0              | 1.063570                | -0.121666 | 2.277688  |
| 20               | 7                | 0              | 1.353831                | -0.761019 | 3.197536  |
| 21               | 6                | 0              | 2.348274                | -0.825566 | -0.226780 |
| 22               | 6                | 0              | 3.512202                | -0.052643 | -0.300477 |
| 23               | 6                | 0              | 2.446380                | -2.217390 | -0.192457 |
| 24               | 6                | 0              | 4.761486                | -0.667213 | -0.343081 |
| 25               | 1                | 0              | 3.448033                | 1.031954  | -0.323987 |
| 26               | 6                | 0              | 3.698566                | -2.829703 | -0.235019 |
| 27               | 1                | 0              | 1.542736                | -2.814182 | -0.130362 |
| 28               | 6                | 0              | 4.857068                | -2.058362 | -0.311473 |



|    |   |   |           |           |           |
|----|---|---|-----------|-----------|-----------|
| 29 | 1 | 0 | 5.658697  | -0.059002 | -0.399058 |
| 30 | 1 | 0 | 3.767187  | -3.912625 | -0.206481 |
| 31 | 1 | 0 | 5.830316  | -2.537841 | -0.344805 |
| 32 | 6 | 0 | -2.505696 | -0.857294 | -0.026741 |
| 33 | 6 | 0 | -3.690030 | -0.126788 | -0.174977 |
| 34 | 6 | 0 | -2.572419 | -2.230725 | 0.217800  |
| 35 | 6 | 0 | -4.925429 | -0.763382 | -0.076672 |
| 36 | 1 | 0 | -3.655582 | 0.941637  | -0.367966 |
| 37 | 6 | 0 | -3.810306 | -2.865227 | 0.313315  |
| 38 | 1 | 0 | -1.653188 | -2.795164 | 0.331322  |
| 39 | 6 | 0 | -4.988747 | -2.134977 | 0.167459  |
| 40 | 1 | 0 | -5.837941 | -0.186945 | -0.192241 |
| 41 | 1 | 0 | -3.851898 | -3.933164 | 0.503449  |
| 42 | 1 | 0 | -5.951262 | -2.630877 | 0.243792  |
| 43 | 6 | 0 | 1.269883  | 1.306113  | -2.400393 |
| 44 | 6 | 0 | 0.526152  | 1.927290  | -3.413047 |
| 45 | 1 | 0 | 1.042576  | 2.435756  | -4.220763 |
| 46 | 6 | 0 | -0.867326 | 1.884328  | -3.405078 |
| 47 | 1 | 0 | -1.421514 | 2.359172  | -4.208580 |
| 48 | 6 | 0 | -1.565155 | 1.225568  | -2.383184 |
| 49 | 1 | 0 | 2.355079  | 1.326137  | -2.422386 |
| 50 | 1 | 0 | -2.649463 | 1.188239  | -2.395651 |

### Endo Transition State of trapping Allene 7d with DPIBF

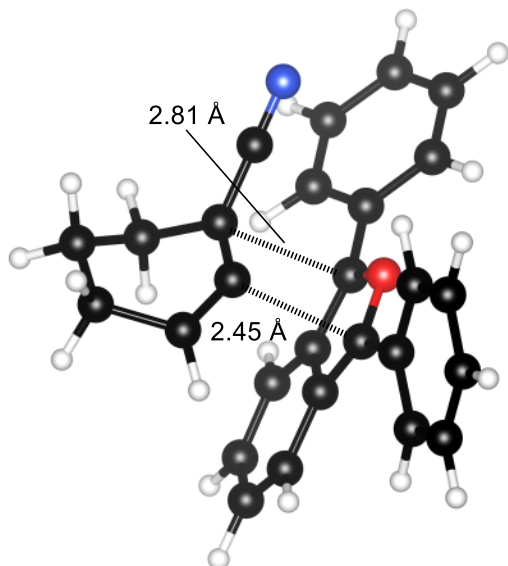

HF (M062X/6-31+G(d,p)) = -1170.957172 Hartrees

Imaginary Frequencies: 1 (-129.44  $\text{cm}^{-1}$ )

Zero-point correction = 0.403206 (Hartree/Particle)

Thermal correction = 0.349084 Hartrees

Coordinates from last standard orientation:

| Center<br>Number | Atomic<br>Number | Atomic<br>Type | Coordinates (Angstroms) |   |   |
|------------------|------------------|----------------|-------------------------|---|---|
|                  |                  |                | X                       | Y | Z |

|    |   |   |           |           |           |
|----|---|---|-----------|-----------|-----------|
| 1  | 6 | 0 | 0.529426  | 0.787636  | 1.632337  |
| 2  | 6 | 0 | -0.788663 | 0.836032  | 1.364986  |
| 3  | 6 | 0 | -1.670399 | 1.805664  | 1.510404  |
| 4  | 6 | 0 | 1.108377  | 2.195458  | 1.700199  |
| 5  | 6 | 0 | 0.255880  | 2.934250  | 2.766958  |
| 6  | 1 | 0 | 0.484299  | 2.481116  | 3.737123  |
| 7  | 6 | 0 | -1.278695 | 2.883604  | 2.518033  |
| 8  | 1 | 0 | -1.620444 | 3.827839  | 2.077663  |
| 9  | 1 | 0 | 2.163230  | 2.192053  | 1.988141  |
| 10 | 1 | 0 | 1.015844  | 2.675119  | 0.718777  |
| 11 | 1 | 0 | 0.569928  | 3.981577  | 2.822726  |
| 12 | 1 | 0 | -1.809946 | 2.776967  | 3.468911  |
| 13 | 1 | 0 | -2.524037 | 1.960884  | 0.854847  |
| 14 | 6 | 0 | 1.050894  | -0.387296 | -0.871837 |
| 15 | 6 | 0 | 0.571871  | 0.759906  | -1.509089 |
| 16 | 6 | 0 | -0.856640 | 0.711427  | -1.404959 |
| 17 | 6 | 0 | -1.156905 | -0.458050 | -0.688042 |
| 18 | 8 | 0 | -0.000196 | -1.136997 | -0.482280 |
| 19 | 6 | 0 | 1.174688  | -0.318118 | 2.257176  |
| 20 | 7 | 0 | 1.727283  | -1.211846 | 2.754415  |
| 21 | 6 | 0 | 2.380015  | -0.947438 | -0.666085 |
| 22 | 6 | 0 | 3.498562  | -0.106261 | -0.573005 |
| 23 | 6 | 0 | 2.548243  | -2.331927 | -0.522720 |
| 24 | 6 | 0 | 4.764900  | -0.644907 | -0.367238 |
| 25 | 1 | 0 | 3.370682  | 0.970701  | -0.621218 |
| 26 | 6 | 0 | 3.816675  | -2.863669 | -0.311675 |
| 27 | 1 | 0 | 1.682404  | -2.983886 | -0.577589 |
| 28 | 6 | 0 | 4.929170  | -2.024929 | -0.239789 |
| 29 | 1 | 0 | 5.622843  | 0.015609  | -0.291205 |
| 30 | 1 | 0 | 3.936816  | -3.936928 | -0.202488 |
| 31 | 1 | 0 | 5.917022  | -2.443327 | -0.075488 |
| 32 | 6 | 0 | -2.397761 | -1.171567 | -0.383902 |
| 33 | 6 | 0 | -3.566742 | -0.931769 | -1.116257 |
| 34 | 6 | 0 | -2.419497 | -2.116174 | 0.653599  |
| 35 | 6 | 0 | -4.742768 | -1.612184 | -0.803255 |
| 36 | 1 | 0 | -3.553257 | -0.240793 | -1.952416 |
| 37 | 6 | 0 | -3.590856 | -2.802216 | 0.951542  |
| 38 | 1 | 0 | -1.515006 | -2.295343 | 1.228235  |
| 39 | 6 | 0 | -4.759561 | -2.547704 | 0.229264  |
| 40 | 1 | 0 | -5.642428 | -1.418264 | -1.378826 |
| 41 | 1 | 0 | -3.596694 | -3.529901 | 1.757065  |
| 42 | 1 | 0 | -5.674714 | -3.079518 | 0.469087  |
| 43 | 6 | 0 | -1.644908 | 1.775531  | -1.926116 |
| 44 | 1 | 0 | -2.725002 | 1.774093  | -1.827714 |
| 45 | 6 | 0 | -1.005968 | 2.816356  | -2.546625 |
| 46 | 1 | 0 | -1.588546 | 3.636635  | -2.953816 |
| 47 | 6 | 0 | 0.418093  | 2.849437  | -2.678592 |
| 48 | 1 | 0 | 0.877813  | 3.685313  | -3.195863 |
| 49 | 6 | 0 | 1.205402  | 1.850041  | -2.171604 |
| 50 | 1 | 0 | 2.282778  | 1.882162  | -2.290880 |

-----

**Exo adduct: Allene 7d with DPIBF (product 13d)**

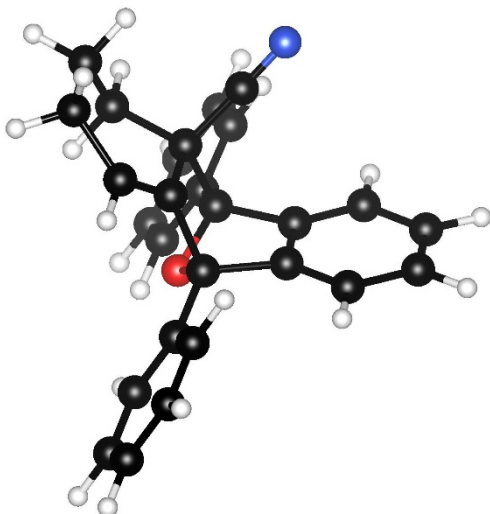

HF (M062X/6-31+G(d,p)) = -1171.0480176 Hartrees

Imaginary Frequencies: none found

Zero-point correction = 0.407943 (Hartree/Particle)

Thermal correction = 0.356255 Hartrees

**Coordinates from last standard orientation:**

HF = -1171.0480176 hartrees

|                                              |                             |
|----------------------------------------------|-----------------------------|
| Zero-point correction=                       | 0.407943 (Hartree/Particle) |
| Thermal correction to Gibbs Free Energy=     | 0.356255                    |
| Sum of electronic and zero-point Energies=   | -1170.640075                |
| Sum of electronic and thermal Free Energies= | -1170.691762                |

Standard orientation:

| Center Number | Atomic Number | Atomic Type | Coordinates (Angstroms) |           |           |
|---------------|---------------|-------------|-------------------------|-----------|-----------|
|               |               |             | X                       | Y         | Z         |
| 1             | 6             | 0           | -0.753251               | -0.973580 | 0.876964  |
| 2             | 6             | 0           | 0.773733                | -1.050854 | 0.821487  |
| 3             | 6             | 0           | 1.445765                | -2.156164 | 1.128279  |
| 4             | 6             | 0           | -1.318091               | -2.366469 | 0.552255  |
| 5             | 6             | 0           | -0.762507               | -3.370308 | 1.570277  |
| 6             | 1             | 0           | -1.139927               | -3.098760 | 2.562413  |
| 7             | 6             | 0           | 0.777566                | -3.423296 | 1.593048  |
| 8             | 1             | 0           | 1.133274                | -4.217978 | 0.924937  |
| 9             | 1             | 0           | -2.411732               | -2.354977 | 0.582692  |
| 10            | 1             | 0           | -1.006363               | -2.615691 | -0.468461 |
| 11            | 1             | 0           | -1.156855               | -4.366367 | 1.351824  |
| 12            | 1             | 0           | 1.131491                | -3.699198 | 2.592731  |
| 13            | 1             | 0           | 2.516588                | -2.198883 | 0.938665  |
| 14            | 6             | 0           | 1.195354                | 0.117611  | -0.074960 |
| 15            | 6             | 0           | 0.785093                | 1.433567  | 0.582699  |
| 16            | 6             | 0           | -0.606712               | 1.481863  | 0.473674  |
| 17            | 6             | 0           | -0.990761               | 0.174842  | -0.209298 |
| 18            | 8             | 0           | 0.140306                | -0.023835 | -1.060937 |
| 19            | 6             | 0           | -2.292598               | 0.117234  | -0.948093 |
| 20            | 6             | 0           | -3.492937               | 0.178838  | -0.231065 |
| 21            | 6             | 0           | -2.323608               | 0.008726  | -2.338960 |

|    |   |   |           |           |           |
|----|---|---|-----------|-----------|-----------|
| 22 | 6 | 0 | -4.712490 | 0.137363  | -0.901794 |
| 23 | 1 | 0 | -3.477468 | 0.251857  | 0.854455  |
| 24 | 6 | 0 | -3.547246 | -0.033935 | -3.007867 |
| 25 | 1 | 0 | -1.390951 | -0.042261 | -2.890765 |
| 26 | 6 | 0 | -4.741883 | 0.031512  | -2.293193 |
| 27 | 1 | 0 | -5.638671 | 0.184490  | -0.337916 |
| 28 | 1 | 0 | -3.564711 | -0.119236 | -4.089897 |
| 29 | 1 | 0 | -5.692397 | -0.002284 | -2.816234 |
| 30 | 6 | 0 | 2.562964  | 0.046796  | -0.681355 |
| 31 | 6 | 0 | 3.686039  | 0.098619  | 0.151882  |
| 32 | 6 | 0 | 2.732361  | -0.068463 | -2.061398 |
| 33 | 6 | 0 | 4.966524  | 0.038119  | -0.393441 |
| 34 | 1 | 0 | 3.558755  | 0.176645  | 1.229308  |
| 35 | 6 | 0 | 4.015934  | -0.129766 | -2.604438 |
| 36 | 1 | 0 | 1.859793  | -0.107969 | -2.704390 |
| 37 | 6 | 0 | 5.134006  | -0.076217 | -1.774002 |
| 38 | 1 | 0 | 5.832437  | 0.076693  | 0.259903  |
| 39 | 1 | 0 | 4.140596  | -0.219295 | -3.679145 |
| 40 | 1 | 0 | 6.131712  | -0.125144 | -2.198730 |
| 41 | 6 | 0 | -1.336887 | 2.544303  | 0.975325  |
| 42 | 6 | 0 | -0.628571 | 3.584812  | 1.590447  |
| 43 | 1 | 0 | -1.168188 | 4.441670  | 1.981191  |
| 44 | 6 | 0 | 0.761357  | 3.538379  | 1.701512  |
| 45 | 1 | 0 | 1.286815  | 4.360455  | 2.177016  |
| 46 | 6 | 0 | 1.491112  | 2.452563  | 1.199324  |
| 47 | 1 | 0 | -2.419252 | 2.581029  | 0.892108  |
| 48 | 1 | 0 | 2.573621  | 2.429628  | 1.279623  |
| 49 | 6 | 0 | -1.247819 | -0.556872 | 2.199582  |
| 50 | 7 | 0 | -1.665100 | -0.259870 | 3.237831  |

**Exo Transition State of trapping Allene 7d with DPIBF**

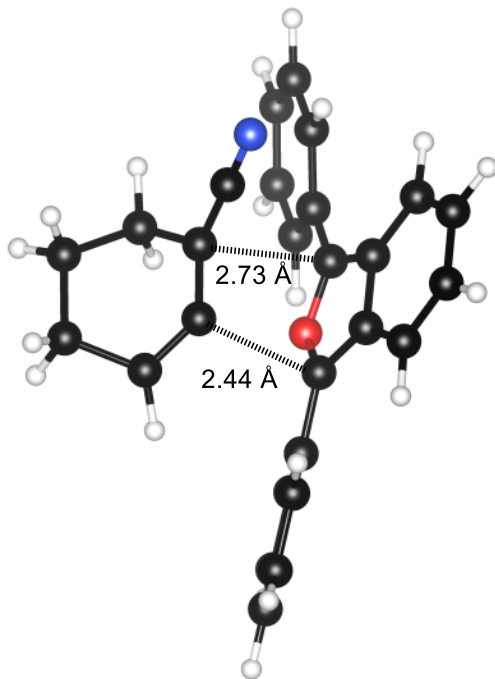

HF (M062X/6-31+G(d,p)) = -1170.9584057 Hartrees

Imaginary Frequencies: 1 (-154.26 cm<sup>-1</sup>)  
 Zero-point correction = 0.403658 (Hartree/Particle)  
 Thermal correction = 0.350470 Hartrees

Coordinates from last standard orientation:

| Center<br>Number | Atomic<br>Number | Atomic<br>Type | Coordinates (Angstroms) |           |           |
|------------------|------------------|----------------|-------------------------|-----------|-----------|
|                  |                  |                | X                       | Y         | Z         |
| 1                | 6                | 0              | -0.677808               | 0.425308  | -1.691976 |
| 2                | 6                | 0              | 0.663041                | 0.509464  | -1.558384 |
| 3                | 6                | 0              | 1.483151                | 1.515417  | -1.804655 |
| 4                | 6                | 0              | -1.306299               | 1.812954  | -1.684961 |
| 5                | 6                | 0              | -0.608563               | 2.575861  | -2.842342 |
| 6                | 1                | 0              | -0.935761               | 2.116371  | -3.780708 |
| 7                | 6                | 0              | 0.943805                | 2.569359  | -2.770472 |
| 8                | 1                | 0              | 1.307643                | 3.529122  | -2.385908 |
| 9                | 1                | 0              | -2.387836               | 1.774711  | -1.842798 |
| 10               | 1                | 0              | -1.117067               | 2.296288  | -0.720026 |
| 11               | 1                | 0              | -0.958298               | 3.613137  | -2.857114 |
| 12               | 1                | 0              | 1.366782                | 2.459721  | -3.773913 |
| 13               | 1                | 0              | 2.405320                | 1.708275  | -1.262416 |
| 14               | 6                | 0              | 1.220806                | -0.474071 | 0.606932  |
| 15               | 6                | 0              | 0.759275                | -1.770643 | 0.314790  |
| 16               | 6                | 0              | -0.659433               | -1.738644 | 0.488612  |
| 17               | 6                | 0              | -0.973989               | -0.434420 | 0.889989  |
| 18               | 8                | 0              | 0.170217                | 0.250372  | 1.077489  |
| 19               | 6                | 0              | -2.221238               | 0.252869  | 1.199228  |
| 20               | 6                | 0              | -3.421043               | -0.162687 | 0.601913  |
| 21               | 6                | 0              | -2.228105               | 1.364740  | 2.054603  |
| 22               | 6                | 0              | -4.607997               | 0.509593  | 0.875887  |
| 23               | 1                | 0              | -3.416267               | -0.983185 | -0.109327 |
| 24               | 6                | 0              | -3.418692               | 2.035155  | 2.319821  |
| 25               | 1                | 0              | -1.299811               | 1.695368  | 2.510160  |
| 26               | 6                | 0              | -4.612592               | 1.607690  | 1.737510  |
| 27               | 1                | 0              | -5.529324               | 0.183713  | 0.403503  |
| 28               | 1                | 0              | -3.414329               | 2.893503  | 2.984153  |
| 29               | 1                | 0              | -5.539480               | 2.131893  | 1.947073  |
| 30               | 6                | 0              | 2.556305                | 0.071944  | 0.828891  |
| 31               | 6                | 0              | 3.643397                | -0.389974 | 0.072735  |
| 32               | 6                | 0              | 2.762306                | 1.085400  | 1.776401  |
| 33               | 6                | 0              | 4.915407                | 0.136355  | 0.278928  |
| 34               | 1                | 0              | 3.484947                | -1.130870 | -0.704543 |
| 35               | 6                | 0              | 4.035505                | 1.613291  | 1.971439  |
| 36               | 1                | 0              | 1.923257                | 1.450686  | 2.359871  |
| 37               | 6                | 0              | 5.117188                | 1.138814  | 1.228690  |
| 38               | 1                | 0              | 5.748103                | -0.226244 | -0.315533 |
| 39               | 1                | 0              | 4.183483                | 2.394722  | 2.710121  |
| 40               | 1                | 0              | 6.108725                | 1.551973  | 1.383371  |
| 41               | 6                | 0              | -1.436431               | -2.909134 | 0.268401  |
| 42               | 6                | 0              | -0.787467               | -4.055197 | -0.109248 |
| 43               | 1                | 0              | -1.355662               | -4.964323 | -0.276976 |
| 44               | 6                | 0              | 0.630523                | -4.087619 | -0.276579 |
| 45               | 1                | 0              | 1.102542                | -5.022951 | -0.560217 |
| 46               | 6                | 0              | 1.404814                | -2.974560 | -0.070548 |
| 47               | 1                | 0              | -2.510971               | -2.904415 | 0.412526  |
| 48               | 1                | 0              | 2.482408                | -3.024218 | -0.179411 |

|    |   |   |           |           |           |
|----|---|---|-----------|-----------|-----------|
| 49 | 6 | 0 | -1.369173 | -0.673579 | -2.276903 |
| 50 | 7 | 0 | -1.978613 | -1.552624 | -2.733431 |

---

**Endo adduct: Allene 7d with 2,5-Diphenylfuran**

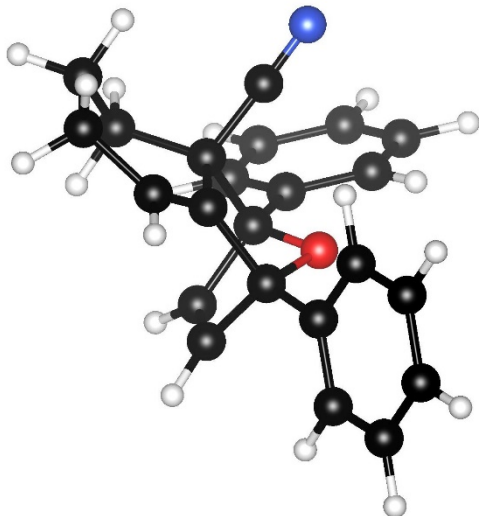

HF (M062X/6-31+G(d,p)) = -1017.4404702 Hartrees

Imaginary Frequencies: none found

Zero-point correction = 0.359699 (Hartree/Particle)

Thermal correction = 0.311187 Hartrees

Coordinates from last standard orientation:

---

| Center<br>Number | Atomic<br>Number | Atomic<br>Type | Coordinates (Angstroms) |           |           |
|------------------|------------------|----------------|-------------------------|-----------|-----------|
|                  |                  |                | X                       | Y         | Z         |
| 1                | 6                | 0              | 0.715747                | 1.149760  | 0.102901  |
| 2                | 6                | 0              | -0.791148               | 1.237832  | -0.095646 |
| 3                | 6                | 0              | -1.454790               | 2.388445  | -0.139020 |
| 4                | 6                | 0              | 1.391812                | 2.405716  | -0.452145 |
| 5                | 6                | 0              | 0.752408                | 3.635114  | 0.211758  |
| 6                | 1                | 0              | 0.962038                | 3.594861  | 1.286681  |
| 7                | 6                | 0              | -0.767101               | 3.724689  | -0.016595 |
| 8                | 1                | 0              | -0.972623               | 4.268483  | -0.948604 |
| 9                | 1                | 0              | 2.470113                | 2.386574  | -0.264990 |
| 10               | 1                | 0              | 1.225813                | 2.420519  | -1.536103 |
| 11               | 1                | 0              | 1.229882                | 4.544297  | -0.163626 |
| 12               | 1                | 0              | -1.228934               | 4.319087  | 0.779504  |
| 13               | 1                | 0              | -2.521987               | 2.386032  | -0.358914 |
| 14               | 6                | 0              | 1.015372                | 1.011731  | 1.539604  |
| 15               | 7                | 0              | 1.264887                | 0.922157  | 2.666402  |
| 16               | 6                | 0              | 0.970876                | -0.281081 | -0.561586 |
| 17               | 6                | 0              | 0.561950                | -0.171591 | -2.025293 |
| 18               | 6                | 0              | -0.770929               | -0.123199 | -2.030950 |
| 19               | 6                | 0              | -1.200562               | -0.166310 | -0.560823 |
| 20               | 8                | 0              | -0.145074               | -0.973189 | 0.004455  |
| 21               | 1                | 0              | 1.248349                | -0.069454 | -2.856227 |
| 22               | 1                | 0              | -1.438816               | 0.059746  | -2.864343 |

|    |   |   |           |           |           |
|----|---|---|-----------|-----------|-----------|
| 23 | 6 | 0 | -2.558283 | -0.679712 | -0.184738 |
| 24 | 6 | 0 | -3.068382 | -0.407559 | 1.088380  |
| 25 | 6 | 0 | -3.297485 | -1.470240 | -1.066617 |
| 26 | 6 | 0 | -4.306657 | -0.915488 | 1.472262  |
| 27 | 1 | 0 | -2.489750 | 0.204039  | 1.775484  |
| 28 | 6 | 0 | -4.540949 | -1.974242 | -0.685328 |
| 29 | 1 | 0 | -2.899928 | -1.699425 | -2.051285 |
| 30 | 6 | 0 | -5.046943 | -1.696461 | 0.583349  |
| 31 | 1 | 0 | -4.695374 | -0.701296 | 2.462872  |
| 32 | 1 | 0 | -5.111216 | -2.585402 | -1.377733 |
| 33 | 1 | 0 | -6.014729 | -2.088129 | 0.880907  |
| 34 | 6 | 0 | 2.287502  | -0.919747 | -0.240075 |
| 35 | 6 | 0 | 2.380958  | -1.913443 | 0.736041  |
| 36 | 6 | 0 | 3.441222  | -0.487657 | -0.901456 |
| 37 | 6 | 0 | 3.619867  | -2.475401 | 1.041344  |
| 38 | 1 | 0 | 1.483119  | -2.240065 | 1.250686  |
| 39 | 6 | 0 | 4.678679  | -1.046590 | -0.590278 |
| 40 | 1 | 0 | 3.374967  | 0.286367  | -1.662615 |
| 41 | 6 | 0 | 4.769465  | -2.043908 | 0.381034  |
| 42 | 1 | 0 | 3.687006  | -3.250265 | 1.798602  |
| 43 | 1 | 0 | 5.569851  | -0.706641 | -1.108454 |
| 44 | 1 | 0 | 5.732836  | -2.482879 | 0.620977  |

### Endo Transition State of trapping Allene 7d with 2,5-Diphenylfuran

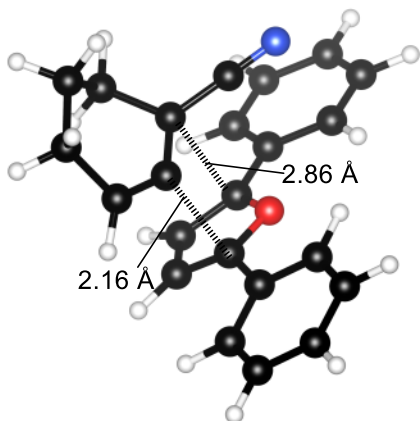

HF (M062X/6-31+G(d,p)) = -1017.3774224 Hartrees

Imaginary Frequencies: 1 (-213.61  $\text{cm}^{-1}$ )

Zero-point correction = 0.355958 (Hartree/Particle)

Thermal correction = 0.305401 Hartrees

Coordinates from last standard orientation:

| Center Number | Atomic Number | Atomic Type | Coordinates (Angstroms) |          |           |
|---------------|---------------|-------------|-------------------------|----------|-----------|
|               |               |             | X                       | Y        | Z         |
| 1             | 6             | 0           | -0.279813               | 1.685929 | -0.531600 |
| 2             | 6             | 0           | 0.960436                | 1.363043 | -0.078191 |
| 3             | 6             | 0           | 1.956851                | 2.152042 | 0.297122  |
| 4             | 6             | 0           | -0.656897               | 3.101764 | -0.117906 |
| 5             | 6             | 0           | 0.475400                | 4.012998 | -0.653437 |

|    |   |   |           |           |           |
|----|---|---|-----------|-----------|-----------|
| 6  | 1 | 0 | 0.431596  | 3.979870  | -1.747247 |
| 7  | 6 | 0 | 1.890547  | 3.596408  | -0.177215 |
| 8  | 1 | 0 | 2.189092  | 4.200796  | 0.688380  |
| 9  | 1 | 0 | -1.621584 | 3.405179  | -0.533197 |
| 10 | 1 | 0 | -0.718040 | 3.160681  | 0.974868  |
| 11 | 1 | 0 | 0.290850  | 5.051321  | -0.357924 |
| 12 | 1 | 0 | 2.628687  | 3.801068  | -0.959855 |
| 13 | 1 | 0 | 2.727387  | 1.856692  | 1.005905  |
| 14 | 6 | 0 | -0.879709 | 1.067451  | -1.659828 |
| 15 | 7 | 0 | -1.398355 | 0.566546  | -2.574185 |
| 16 | 6 | 0 | -1.175472 | -0.574206 | 0.979577  |
| 17 | 6 | 0 | -0.692677 | -0.002251 | 2.147010  |
| 18 | 6 | 0 | 0.701597  | -0.055272 | 2.070891  |
| 19 | 6 | 0 | 1.016764  | -0.605861 | 0.818743  |
| 20 | 8 | 0 | -0.144383 | -1.049072 | 0.246552  |
| 21 | 1 | 0 | -1.287753 | 0.422305  | 2.941892  |
| 22 | 1 | 0 | 1.409617  | 0.319027  | 2.796068  |
| 23 | 6 | 0 | 2.268936  | -1.179495 | 0.303162  |
| 24 | 6 | 0 | 2.297460  | -1.800898 | -0.951051 |
| 25 | 6 | 0 | 3.447707  | -1.078857 | 1.049772  |
| 26 | 6 | 0 | 3.491268  | -2.317041 | -1.446453 |
| 27 | 1 | 0 | 1.385246  | -1.869441 | -1.536063 |
| 28 | 6 | 0 | 4.642003  | -1.587946 | 0.544427  |
| 29 | 1 | 0 | 3.435412  | -0.613053 | 2.030991  |
| 30 | 6 | 0 | 4.667853  | -2.209740 | -0.703203 |
| 31 | 1 | 0 | 3.504198  | -2.799424 | -2.418804 |
| 32 | 1 | 0 | 5.551213  | -1.506578 | 1.131728  |
| 33 | 1 | 0 | 5.598086  | -2.609631 | -1.093782 |
| 34 | 6 | 0 | -2.527444 | -0.846117 | 0.505685  |
| 35 | 6 | 0 | -2.741038 | -1.646584 | -0.623842 |
| 36 | 6 | 0 | -3.628371 | -0.303137 | 1.185271  |
| 37 | 6 | 0 | -4.038379 | -1.905829 | -1.058610 |
| 38 | 1 | 0 | -1.892122 | -2.059345 | -1.158247 |
| 39 | 6 | 0 | -4.920103 | -0.564999 | 0.745436  |
| 40 | 1 | 0 | -3.472011 | 0.331498  | 2.052673  |
| 41 | 6 | 0 | -5.129575 | -1.369434 | -0.377472 |
| 42 | 1 | 0 | -4.195638 | -2.526014 | -1.935405 |
| 43 | 1 | 0 | -5.765474 | -0.138230 | 1.275738  |
| 44 | 1 | 0 | -6.139274 | -1.571772 | -0.720564 |

-----

**Exo adduct: Allene 7d with 2,5-Diphenylfuran**



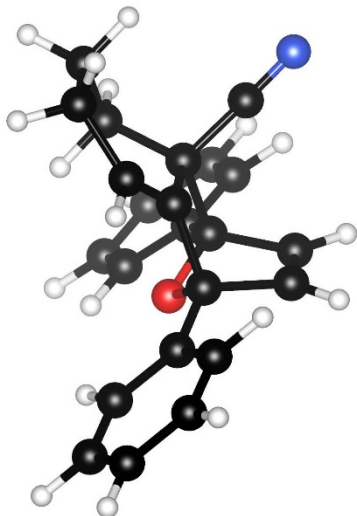

HF (M062X/6-31+G(d,p)) = -1017.4399581 Hartrees

Imaginary Frequencies: none found

Zero-point correction = 0.360007 (Hartree/Particle)

Thermal correction = 0.311723 Hartrees

Coordinates from last standard orientation:

| Center<br>Number | Atomic<br>Number | Atomic<br>Type | Coordinates (Angstroms) |           |           |
|------------------|------------------|----------------|-------------------------|-----------|-----------|
|                  |                  |                | X                       | Y         | Z         |
| 1                | 6                | 0              | 0.742474                | 1.164158  | 0.090361  |
| 2                | 6                | 0              | -0.782176               | 1.164728  | 0.028591  |
| 3                | 6                | 0              | -1.471486               | 1.973718  | -0.769661 |
| 4                | 6                | 0              | 1.276191                | 1.540362  | -1.300056 |
| 5                | 6                | 0              | 0.726778                | 2.924729  | -1.672011 |
| 6                | 1                | 0              | 1.133763                | 3.656667  | -0.965694 |
| 7                | 6                | 0              | -0.814233               | 2.992676  | -1.664119 |
| 8                | 1                | 0              | -1.200257               | 2.805513  | -2.674139 |
| 9                | 1                | 0              | 2.370783                | 1.545596  | -1.304587 |
| 10               | 1                | 0              | 0.933131                | 0.771716  | -2.001967 |
| 11               | 1                | 0              | 1.096926                | 3.210860  | -2.660183 |
| 12               | 1                | 0              | -1.145334               | 4.004819  | -1.405718 |
| 13               | 1                | 0              | -2.545659               | 1.828778  | -0.875921 |
| 14               | 6                | 0              | 1.289632                | 2.106587  | 1.079533  |
| 15               | 7                | 0              | 1.757180                | 2.850529  | 1.833537  |
| 16               | 6                | 0              | -1.194447               | -0.195090 | 0.613715  |
| 17               | 6                | 0              | -0.753634               | -0.240968 | 2.075033  |
| 18               | 6                | 0              | 0.574200                | -0.348853 | 2.058232  |
| 19               | 6                | 0              | 0.968623                | -0.344902 | 0.581402  |
| 20               | 8                | 0              | -0.157639               | -0.982149 | -0.014382 |
| 21               | 1                | 0              | -1.417307               | -0.132997 | 2.923866  |
| 22               | 1                | 0              | 1.268721                | -0.344099 | 2.889119  |
| 23               | 6                | 0              | -2.572550               | -0.670805 | 0.271272  |
| 24               | 6                | 0              | -2.775561               | -1.609732 | -0.741196 |
| 25               | 6                | 0              | -3.671459               | -0.135056 | 0.948927  |
| 26               | 6                | 0              | -4.069550               | -2.016172 | -1.066514 |
| 27               | 1                | 0              | -1.919876               | -2.022029 | -1.265705 |
| 28               | 6                | 0              | -4.963491               | -0.538915 | 0.618948  |

|    |   |   |           |           |           |
|----|---|---|-----------|-----------|-----------|
| 29 | 1 | 0 | -3.519195 | 0.605269  | 1.730616  |
| 30 | 6 | 0 | -5.164878 | -1.482491 | -0.389199 |
| 31 | 1 | 0 | -4.220330 | -2.752175 | -1.850038 |
| 32 | 1 | 0 | -5.811640 | -0.117261 | 1.149223  |
| 33 | 1 | 0 | -6.171145 | -1.799769 | -0.644073 |
| 34 | 6 | 0 | 2.274620  | -0.949705 | 0.170103  |
| 35 | 6 | 0 | 2.339185  | -1.854713 | -0.890544 |
| 36 | 6 | 0 | 3.448936  | -0.562037 | 0.823263  |
| 37 | 6 | 0 | 3.570605  | -2.373121 | -1.290688 |
| 38 | 1 | 0 | 1.424773  | -2.150518 | -1.394687 |
| 39 | 6 | 0 | 4.677990  | -1.077568 | 0.417906  |
| 40 | 1 | 0 | 3.405912  | 0.146472  | 1.647394  |
| 41 | 6 | 0 | 4.740865  | -1.985565 | -0.639776 |
| 42 | 1 | 0 | 3.614578  | -3.079748 | -2.113648 |
| 43 | 1 | 0 | 5.585085  | -0.772053 | 0.929712  |
| 44 | 1 | 0 | 5.698131  | -2.389144 | -0.954421 |

### Exo Transition State of trapping Allene 7d with 2,5-Diphenylfuran

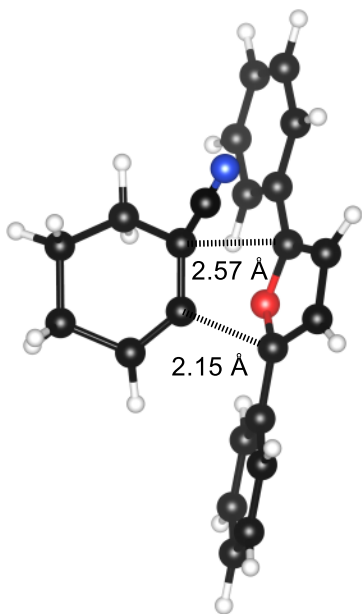

HF (M062X/6-31+G(d,p)) = -1017.3753822 Hartrees

Imaginary Frequencies: 1 (-310.39  $\text{cm}^{-1}$ )

Zero-point correction = 0.356020 (Hartree/Particle)

Thermal correction = 0.305718 Hartrees

Coordinates from last standard orientation:

| Center Number | Atomic Number | Atomic Type | Coordinates (Angstroms) |          |           |
|---------------|---------------|-------------|-------------------------|----------|-----------|
|               |               |             | X                       | Y        | Z         |
| 1             | 6             | 0           | 0.657641                | 1.600001 | 0.216615  |
| 2             | 6             | 0           | -0.695420               | 1.399024 | 0.125836  |
| 3             | 6             | 0           | -1.532380               | 1.818678 | -0.810513 |
| 4             | 6             | 0           | 1.258404                | 1.860457 | -1.154596 |
| 5             | 6             | 0           | 0.506475                | 3.097376 | -1.706709 |

|    |   |   |           |           |           |
|----|---|---|-----------|-----------|-----------|
| 6  | 1 | 0 | 0.775820  | 3.952768  | -1.077878 |
| 7  | 6 | 0 | -1.033099 | 2.928005  | -1.730022 |
| 8  | 1 | 0 | -1.362721 | 2.643405  | -2.736676 |
| 9  | 1 | 0 | 2.334650  | 2.049419  | -1.104323 |
| 10 | 1 | 0 | 1.093153  | 0.983890  | -1.792422 |
| 11 | 1 | 0 | 0.857713  | 3.324276  | -2.718781 |
| 12 | 1 | 0 | -1.520528 | 3.883633  | -1.509652 |
| 13 | 1 | 0 | -2.475014 | 1.330610  | -1.045462 |
| 14 | 6 | 0 | 1.285074  | 2.170241  | 1.360574  |
| 15 | 7 | 0 | 1.836413  | 2.628393  | 2.277592  |
| 16 | 6 | 0 | -1.167147 | -0.574926 | 0.850264  |
| 17 | 6 | 0 | -0.715287 | -0.417105 | 2.176514  |
| 18 | 6 | 0 | 0.659281  | -0.588906 | 2.151732  |
| 19 | 6 | 0 | 0.999512  | -0.877170 | 0.825798  |
| 20 | 8 | 0 | -0.125748 | -1.072602 | 0.107455  |
| 21 | 1 | 0 | -1.331289 | -0.133644 | 3.018036  |
| 22 | 1 | 0 | 1.353943  | -0.451868 | 2.967304  |
| 23 | 6 | 0 | -2.525001 | -0.842619 | 0.355390  |
| 24 | 6 | 0 | -2.733384 | -1.635831 | -0.777890 |
| 25 | 6 | 0 | -3.622271 | -0.270250 | 1.009687  |
| 26 | 6 | 0 | -4.027425 | -1.860226 | -1.242798 |
| 27 | 1 | 0 | -1.883678 | -2.076649 | -1.289134 |
| 28 | 6 | 0 | -4.912886 | -0.499485 | 0.542200  |
| 29 | 1 | 0 | -3.463715 | 0.370364  | 1.872990  |
| 30 | 6 | 0 | -5.120076 | -1.295116 | -0.585699 |
| 31 | 1 | 0 | -4.181713 | -2.479478 | -2.120982 |
| 32 | 1 | 0 | -5.757105 | -0.049290 | 1.054673  |
| 33 | 1 | 0 | -6.126678 | -1.470012 | -0.951838 |
| 34 | 6 | 0 | 2.278246  | -1.159603 | 0.182517  |
| 35 | 6 | 0 | 2.324399  | -1.679589 | -1.117819 |
| 36 | 6 | 0 | 3.474506  | -0.876389 | 0.857239  |
| 37 | 6 | 0 | 3.552352  | -1.920109 | -1.728820 |
| 38 | 1 | 0 | 1.399436  | -1.895742 | -1.642984 |
| 39 | 6 | 0 | 4.697169  | -1.117990 | 0.240119  |
| 40 | 1 | 0 | 3.446725  | -0.453686 | 1.857450  |
| 41 | 6 | 0 | 4.740722  | -1.641799 | -1.053454 |
| 42 | 1 | 0 | 3.580932  | -2.325237 | -2.735387 |
| 43 | 1 | 0 | 5.618234  | -0.892614 | 0.767948  |
| 44 | 1 | 0 | 5.696517  | -1.828103 | -1.532656 |

-----

**Endo adduct: Allene 7d with Isobenzofuran**

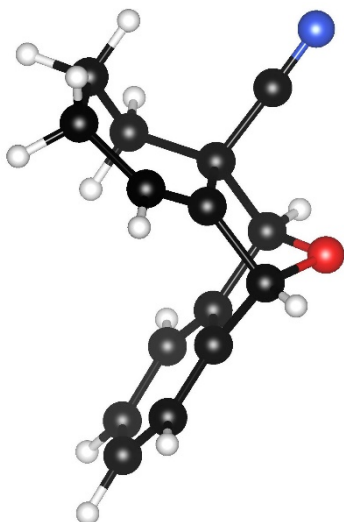

HF (M062X/6-31+G(d,p)) = -709.1003513 Hartrees

Imaginary Frequencies: none found

Zero-point correction = 0.246431 (Hartree/Particle)

Thermal correction = 0.207962 Hartrees

Coordinates from last standard orientation:

| Center<br>Number | Atomic<br>Number | Atomic<br>Type | Coordinates (Angstroms) |           |           |
|------------------|------------------|----------------|-------------------------|-----------|-----------|
|                  |                  |                | X                       | Y         | Z         |
| 1                | 6                | 0              | 1.143464                | -0.457781 | -0.344384 |
| 2                | 6                | 0              | 0.806996                | 0.251222  | 0.969315  |
| 3                | 6                | 0              | 1.206188                | 1.487608  | 1.248291  |
| 4                | 6                | 0              | 1.317803                | 0.578730  | -1.458936 |
| 5                | 6                | 0              | 2.387736                | 1.588708  | -1.018895 |
| 6                | 1                | 0              | 3.338431                | 1.057080  | -0.896864 |
| 7                | 6                | 0              | 2.026839                | 2.313428  | 0.290071  |
| 8                | 1                | 0              | 1.435589                | 3.211834  | 0.067046  |
| 9                | 1                | 0              | 1.603087                | 0.098311  | -2.399837 |
| 10               | 1                | 0              | 0.351190                | 1.074986  | -1.603430 |
| 11               | 1                | 0              | 2.544158                | 2.326736  | -1.810187 |
| 12               | 1                | 0              | 2.938018                | 2.674038  | 0.780249  |
| 13               | 1                | 0              | 0.851986                | 1.975975  | 2.155079  |
| 14               | 6                | 0              | -0.044324               | -1.489186 | -0.376060 |
| 15               | 6                | 0              | -1.351586               | -0.731782 | -0.466828 |
| 16               | 6                | 0              | -1.538918               | -0.184052 | 0.808653  |
| 17               | 6                | 0              | -0.298424               | -0.604280 | 1.585972  |
| 18               | 8                | 0              | -0.036951               | -1.894165 | 1.002055  |
| 19               | 6                | 0              | 2.382197                | -1.244330 | -0.197440 |
| 20               | 7                | 0              | 3.359539                | -1.859050 | -0.115752 |
| 21               | 6                | 0              | -2.250026               | -0.493682 | -1.492509 |
| 22               | 6                | 0              | -3.370599               | 0.298950  | -1.205789 |
| 23               | 1                | 0              | -4.106275               | 0.486412  | -1.981409 |
| 24               | 6                | 0              | -3.556496               | 0.844176  | 0.065246  |
| 25               | 1                | 0              | -4.435878               | 1.449142  | 0.263248  |
| 26               | 6                | 0              | -2.629066               | 0.619740  | 1.092662  |
| 27               | 1                | 0              | -2.103224               | -0.910630 | -2.484508 |
| 28               | 1                | 0              | -2.772187               | 1.057766  | 2.075831  |

|    |   |   |           |           |           |
|----|---|---|-----------|-----------|-----------|
| 29 | 1 | 0 | -0.357359 | -0.658599 | 2.670986  |
| 30 | 1 | 0 | 0.100600  | -2.341201 | -1.038603 |

### Endo Transition State of trapping Allene 7d with Isobenzofuran

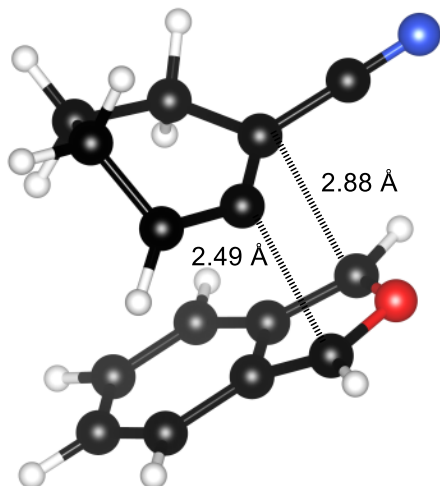

HF (M062X/6-31+G(d,p)) = -708.9967282 Hartrees

Imaginary Frequencies: 1 (-134.21  $\text{cm}^{-1}$ )

Zero-point correction = 0.240331 (Hartree/Particle)

Thermal correction = 0.198535 Hartrees

Coordinates from last standard orientation:

| Center Number | Atomic Number | Atomic Type | Coordinates (Angstroms) |           |           |
|---------------|---------------|-------------|-------------------------|-----------|-----------|
|               |               |             | X                       | Y         | Z         |
| 1             | 6             | 0           | -1.672902               | -0.047281 | 0.212826  |
| 2             | 6             | 0           | -1.167536               | 0.313551  | -0.977104 |
| 3             | 6             | 0           | -0.880766               | 1.508063  | -1.461924 |
| 4             | 6             | 0           | -1.425346               | 0.964531  | 1.339518  |
| 5             | 6             | 0           | -1.172740               | 2.390369  | 0.777595  |
| 6             | 1             | 0           | -1.681112               | 3.120877  | 1.415128  |
| 7             | 6             | 0           | -1.624545               | 2.591084  | -0.698480 |
| 8             | 1             | 0           | -1.356959               | 3.592436  | -1.044051 |
| 9             | 1             | 0           | -2.321436               | 0.957880  | 1.969635  |
| 10            | 1             | 0           | -0.582600               | 0.657858  | 1.969761  |
| 11            | 1             | 0           | -0.101149               | 2.612747  | 0.825254  |
| 12            | 1             | 0           | -2.708199               | 2.473441  | -0.785192 |
| 13            | 1             | 0           | -0.033255               | 1.735026  | -2.102671 |
| 14            | 6             | 0           | 0.346629                | -2.084050 | 0.462873  |
| 15            | 6             | 0           | 1.295887                | -1.081845 | 0.529037  |
| 16            | 6             | 0           | 1.474174                | -0.618715 | -0.819851 |
| 17            | 6             | 0           | 0.580906                | -1.351821 | -1.592007 |
| 18            | 8             | 0           | -0.012780               | -2.285730 | -0.817164 |
| 19            | 6             | 0           | -2.629779               | -1.091439 | 0.388866  |
| 20            | 7             | 0           | -3.404586               | -1.939801 | 0.563103  |
| 21            | 6             | 0           | 2.008922                | -0.464747 | 1.601432  |
| 22            | 6             | 0           | 2.869312                | 0.553856  | 1.299191  |

|    |   |   |           |           |           |
|----|---|---|-----------|-----------|-----------|
| 23 | 1 | 0 | 3.426977  | 1.041234  | 2.092647  |
| 24 | 6 | 0 | 3.068083  | 0.996338  | -0.053082 |
| 25 | 1 | 0 | 3.777355  | 1.797048  | -0.237541 |
| 26 | 6 | 0 | 2.392603  | 0.434443  | -1.101092 |
| 27 | 1 | 0 | 1.868840  | -0.802164 | 2.623676  |
| 28 | 1 | 0 | 2.547708  | 0.776449  | -2.119773 |
| 29 | 1 | 0 | 0.414338  | -1.430688 | -2.654861 |
| 30 | 1 | 0 | -0.093584 | -2.741720 | 1.196789  |

**Exo adduct: Allene 7d with Isobenzofuran**

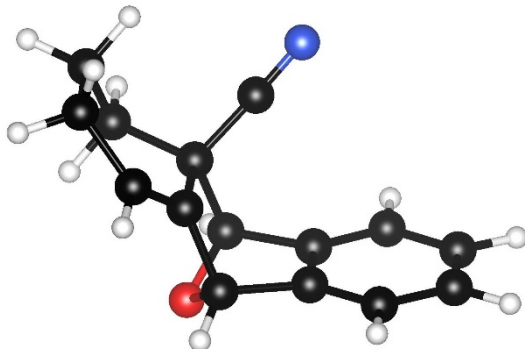

HF (M062X/6-31+G(d,p)) = -709.0983945 Hartrees

Imaginary Frequencies: none found

Zero-point correction = 0.246431 (Hartree/Particle)

Thermal correction = 0.207807 Hartrees

Coordinates from last standard orientation:

| Center Number | Atomic Number | Atomic Type | Coordinates (Angstroms) |           |           |
|---------------|---------------|-------------|-------------------------|-----------|-----------|
|               |               |             | X                       | Y         | Z         |
| 1             | 6             | 0           | 0.972105                | 0.475035  | 0.403169  |
| 2             | 6             | 0           | 0.992564                | -0.892501 | -0.287044 |
| 3             | 6             | 0           | 2.071910                | -1.373450 | -0.896279 |
| 4             | 6             | 0           | 2.381571                | 0.754961  | 0.949932  |
| 5             | 6             | 0           | 3.376504                | 0.723632  | -0.217557 |
| 6             | 1             | 0           | 3.134055                | 1.548365  | -0.896604 |
| 7             | 6             | 0           | 3.367778                | -0.610096 | -0.993361 |
| 8             | 1             | 0           | 4.145163                | -1.275922 | -0.597472 |
| 9             | 1             | 0           | 2.412674                | 1.726582  | 1.452863  |
| 10            | 1             | 0           | 2.605926                | -0.024153 | 1.686459  |
| 11            | 1             | 0           | 4.385426                | 0.917679  | 0.156464  |
| 12            | 1             | 0           | 3.635629                | -0.435943 | -2.041588 |
| 13            | 1             | 0           | 2.070788                | -2.403699 | -1.248164 |
| 14            | 6             | 0           | -0.184369               | -1.640887 | 0.315972  |
| 15            | 6             | 0           | -1.485728               | -0.947442 | -0.040472 |
| 16            | 6             | 0           | -1.487185               | 0.229607  | 0.717352  |
| 17            | 6             | 0           | -0.167993               | 0.198776  | 1.464668  |
| 18            | 8             | 0           | -0.006927               | -1.205569 | 1.688937  |
| 19            | 6             | 0           | -2.518033               | 1.147681  | 0.622162  |
| 20            | 6             | 0           | -3.576887               | 0.848507  | -0.245852 |
| 21            | 1             | 0           | -4.410610               | 1.538319  | -0.330090 |
| 22            | 6             | 0           | -3.575136               | -0.323175 | -1.003767 |

|    |   |   |           |           |           |
|----|---|---|-----------|-----------|-----------|
| 23 | 1 | 0 | -4.408441 | -0.531375 | -1.667511 |
| 24 | 6 | 0 | -2.516396 | -1.237741 | -0.917735 |
| 25 | 1 | 0 | -2.513235 | 2.068963  | 1.196724  |
| 26 | 1 | 0 | -2.515752 | -2.144169 | -1.515444 |
| 27 | 6 | 0 | 0.591442  | 1.564975  | -0.510704 |
| 28 | 7 | 0 | 0.326057  | 2.444934  | -1.214434 |
| 29 | 1 | 0 | -0.077107 | 0.764084  | 2.391376  |
| 30 | 1 | 0 | -0.144390 | -2.726011 | 0.239616  |

### Exo Transition State of trapping Allene 7d with Isobenzofuran

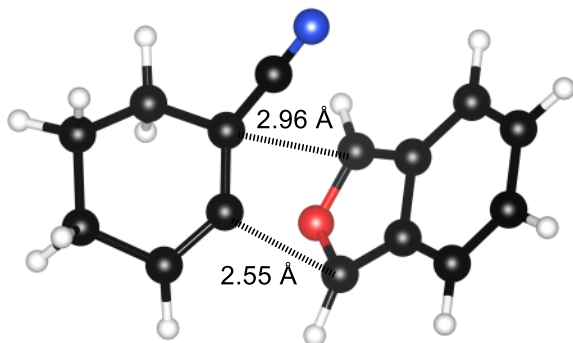

HF (M062X/6-31+G(d,p)) = -708.9950869 Hartrees

Imaginary Frequencies: 1 (-99.53  $\text{cm}^{-1}$ )

Zero-point correction = 0.240509 (Hartree/Particle)

Thermal correction = 0.198520 Hartrees

Coordinates from last standard orientation:

| Center Number | Atomic Number | Atomic Type | Coordinates (Angstroms) |           |           |
|---------------|---------------|-------------|-------------------------|-----------|-----------|
|               |               |             | X                       | Y         | Z         |
| 1             | 6             | 0           | 1.291734                | 0.681588  | 0.110565  |
| 2             | 6             | 0           | 1.307730                | -0.461019 | -0.589766 |
| 3             | 6             | 0           | 2.292561                | -1.258827 | -0.953388 |
| 4             | 6             | 0           | 2.568983                | 0.802418  | 0.938651  |
| 5             | 6             | 0           | 3.725559                | 0.684747  | -0.091219 |
| 6             | 1             | 0           | 3.698624                | 1.583655  | -0.715355 |
| 7             | 6             | 0           | 3.662258                | -0.579042 | -0.995741 |
| 8             | 1             | 0           | 4.371165                | -1.334782 | -0.638707 |
| 9             | 1             | 0           | 2.624574                | 1.756879  | 1.468455  |
| 10            | 1             | 0           | 2.613091                | -0.007059 | 1.673222  |
| 11            | 1             | 0           | 4.684240                | 0.693085  | 0.437522  |
| 12            | 1             | 0           | 3.966426                | -0.326260 | -2.016010 |
| 13            | 1             | 0           | 2.222983                | -2.338294 | -1.046675 |
| 14            | 6             | 0           | -0.579746               | -1.923585 | 0.295290  |
| 15            | 6             | 0           | -1.604442               | -1.092813 | -0.129443 |
| 16            | 6             | 0           | -1.755662               | -0.097515 | 0.897213  |
| 17            | 6             | 0           | -0.826906               | -0.415357 | 1.870333  |
| 18            | 8             | 0           | -0.181750               | -1.545307 | 1.529998  |
| 19            | 6             | 0           | -2.716684               | 0.948100  | 0.747417  |
| 20            | 6             | 0           | -3.482990               | 0.959120  | -0.383076 |
| 21            | 1             | 0           | -4.222876               | 1.740401  | -0.524427 |
| 22            | 6             | 0           | -3.332161               | -0.038032 | -1.407309 |

|    |   |   |           |           |           |
|----|---|---|-----------|-----------|-----------|
| 23 | 1 | 0 | -3.966789 | 0.020585  | -2.286023 |
| 24 | 6 | 0 | -2.414692 | -1.045323 | -1.301614 |
| 25 | 1 | 0 | -2.826703 | 1.710371  | 1.511804  |
| 26 | 1 | 0 | -2.300510 | -1.790407 | -2.082296 |
| 27 | 6 | 0 | 0.524852  | 1.832508  | -0.235980 |
| 28 | 7 | 0 | -0.088886 | 2.787017  | -0.485982 |
| 29 | 1 | 0 | -0.577146 | 0.013168  | 2.828715  |
| 30 | 1 | 0 | -0.173232 | -2.849824 | -0.079940 |

### 1,3 addition: Endo transition state of Allene 7d and furan

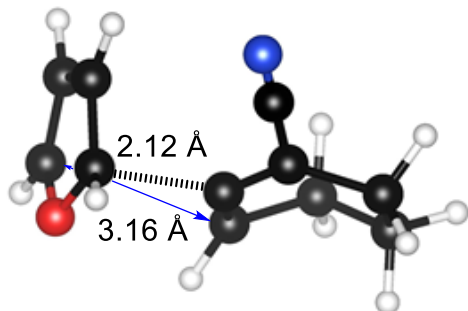

HF (M062X/6-31+G(d,p)) = -555.4133096 Hartrees

Imaginary Frequencies: 1 (-287.77  $\text{cm}^{-1}$ )

Zero-point correction = 0.193182 (Hartree/Particle)

Thermal correction = 0.155138 Hartrees

Coordinates from last standard orientation:

| Center Number | Atomic Number | Atomic Type | Coordinates (Angstroms) |           |           |
|---------------|---------------|-------------|-------------------------|-----------|-----------|
|               |               |             | X                       | Y         | Z         |
| 1             | 6             | 0           | -0.252693               | -1.501688 | -0.228217 |
| 2             | 6             | 0           | -0.256261               | -0.173743 | -0.397531 |
| 3             | 6             | 0           | -1.252024               | 0.713540  | -0.228409 |
| 4             | 6             | 0           | -1.397008               | -1.922492 | 0.678749  |
| 5             | 6             | 0           | -2.692139               | -1.376411 | 0.024647  |
| 6             | 1             | 0           | -2.810936               | -1.875486 | -0.942641 |
| 7             | 6             | 0           | -2.676171               | 0.156083  | -0.186813 |
| 8             | 1             | 0           | -3.176439               | 0.657238  | 0.650195  |
| 9             | 1             | 0           | -1.453370               | -3.009675 | 0.777659  |
| 10            | 1             | 0           | -1.277824               | -1.497127 | 1.682041  |
| 11            | 1             | 0           | -3.563826               | -1.642480 | 0.632199  |
| 12            | 1             | 0           | -3.235870               | 0.421527  | -1.089792 |
| 13            | 6             | 0           | 2.616775                | -1.084692 | 0.093254  |
| 14            | 6             | 0           | 2.515205                | -0.167191 | 1.116572  |
| 15            | 6             | 0           | 1.926917                | 0.978321  | 0.557557  |
| 16            | 6             | 0           | 1.620222                | 0.646643  | -0.766492 |
| 17            | 8             | 0           | 2.213878                | -0.548085 | -1.071782 |
| 18            | 1             | 0           | 3.031083                | -2.080533 | 0.044325  |
| 19            | 1             | 0           | 2.811150                | -0.328337 | 2.142463  |
| 20            | 1             | 0           | 1.662810                | 1.902157  | 1.051411  |
| 21            | 1             | 0           | 1.400341                | 1.284546  | -1.611143 |
| 22            | 6             | 0           | -1.028096               | 2.091832  | 0.064685  |
| 23            | 7             | 0           | -0.868795               | 3.228213  | 0.251756  |



24 1 0 0.235057 -2.205850 -0.892760

---

### 1,3 addition: Endo adduct of Allene 7d and furan

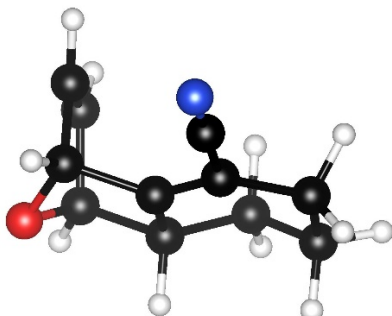

HF (M062X/6-31+G(d,p)) = -555.4996432 Hartrees

Imaginary Frequencies: none found

Zero-point correction = 0.198973 (Hartree/Particle)

Thermal correction = 0.163673 Hartrees

Coordinates from last standard orientation:

---

| Center<br>Number | Atomic<br>Number | Atomic<br>Type | Coordinates (Angstroms) |           |           |
|------------------|------------------|----------------|-------------------------|-----------|-----------|
|                  |                  |                | X                       | Y         | Z         |
| 1                | 6                | 0              | -0.749709               | 1.021418  | -0.506615 |
| 2                | 6                | 0              | 0.101714                | -0.223728 | -0.433996 |
| 3                | 6                | 0              | 1.412129                | -0.202219 | -0.162566 |
| 4                | 6                | 0              | -0.175717               | 2.104682  | 0.394383  |
| 5                | 6                | 0              | 1.282789                | 2.334602  | -0.031677 |
| 6                | 1                | 0              | 1.288250                | 2.644839  | -1.083194 |
| 7                | 6                | 0              | 2.161478                | 1.084198  | 0.133541  |
| 8                | 1                | 0              | 2.527471                | 1.015165  | 1.165929  |
| 9                | 1                | 0              | -0.744923               | 3.035100  | 0.306131  |
| 10               | 1                | 0              | -0.219796               | 1.778234  | 1.441749  |
| 11               | 1                | 0              | 1.725366                | 3.153707  | 0.542029  |
| 12               | 1                | 0              | 3.049181                | 1.158308  | -0.503061 |
| 13               | 6                | 0              | -2.145427               | 0.368308  | -0.253331 |
| 14               | 6                | 0              | -2.149771               | -0.259237 | 1.133765  |
| 15               | 6                | 0              | -1.378483               | -1.345715 | 1.040100  |
| 16               | 6                | 0              | -0.899929               | -1.374415 | -0.415729 |
| 17               | 8                | 0              | -2.013438               | -0.788877 | -1.096709 |
| 18               | 1                | 0              | -3.005974               | 0.966489  | -0.546599 |
| 19               | 1                | 0              | -2.616347               | 0.162948  | 2.014531  |
| 20               | 1                | 0              | -1.040226               | -2.019788 | 1.816852  |
| 21               | 1                | 0              | -0.602363               | -2.326409 | -0.850758 |
| 22               | 6                | 0              | 2.124744                | -1.442191 | -0.016722 |
| 23               | 7                | 0              | 2.715580                | -2.433104 | 0.103928  |
| 24               | 1                | 0              | -0.765113               | 1.379933  | -1.544354 |

---

### 1,3 addition: Exo transition state of Allene 7d and furan

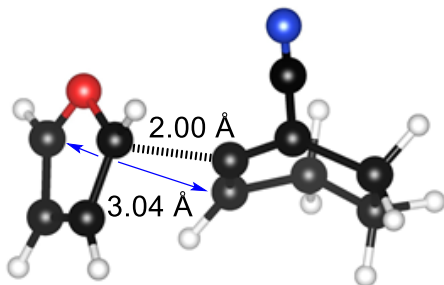

HF (M062X/6-31+G(d,p)) = -555.4138819 Hartrees

Imaginary Frequencies: 1 (-225.76  $\text{cm}^{-1}$ )

Zero-point correction = 0.193276 (Hartree/Particle)

Thermal correction = 0.155072 Hartrees

Coordinates from last standard orientation:

| Center Number | Atomic Number | Atomic Type | Coordinates (Angstroms) |           |           |
|---------------|---------------|-------------|-------------------------|-----------|-----------|
|               |               |             | X                       | Y         | Z         |
| 1             | 6             | 0           | -0.114799               | -1.409351 | 0.149848  |
| 2             | 6             | 0           | -0.253793               | -0.102731 | -0.089655 |
| 3             | 6             | 0           | -1.376340               | 0.633688  | -0.206526 |
| 4             | 6             | 0           | -1.372410               | -1.971516 | 0.785767  |
| 5             | 6             | 0           | -2.521199               | -1.647369 | -0.206180 |
| 6             | 1             | 0           | -2.313603               | -2.180197 | -1.139873 |
| 7             | 6             | 0           | -2.671581               | -0.135682 | -0.494486 |
| 8             | 1             | 0           | -3.436702               | 0.294987  | 0.161563  |
| 9             | 1             | 0           | -1.296115               | -3.050268 | 0.942628  |
| 10            | 1             | 0           | -1.570943               | -1.497901 | 1.753256  |
| 11            | 1             | 0           | -3.469199               | -2.035839 | 0.180599  |
| 12            | 1             | 0           | -3.013362               | 0.019826  | -1.523266 |
| 13            | 6             | 0           | 1.563178                | 0.969816  | -0.294198 |
| 14            | 6             | 0           | 2.111002                | 0.139138  | -1.266670 |
| 15            | 6             | 0           | 2.904249                | -0.802512 | -0.575347 |
| 16            | 6             | 0           | 2.845404                | -0.449744 | 0.749581  |
| 17            | 8             | 0           | 2.122652                | 0.672546  | 0.915729  |
| 18            | 1             | 0           | 1.120577                | 1.953205  | -0.370810 |
| 19            | 1             | 0           | 1.898541                | 0.183588  | -2.324884 |
| 20            | 1             | 0           | 3.435665                | -1.648533 | -0.985537 |
| 21            | 1             | 0           | 3.292042                | -0.867001 | 1.639461  |
| 22            | 6             | 0           | -1.434266               | 2.014284  | 0.129983  |
| 23            | 7             | 0           | -1.475997               | 3.153124  | 0.365114  |
| 24            | 1             | 0           | 0.627191                | -2.052225 | -0.307464 |

### 1,3 addition: Exo adduct of Allene 7d and furan

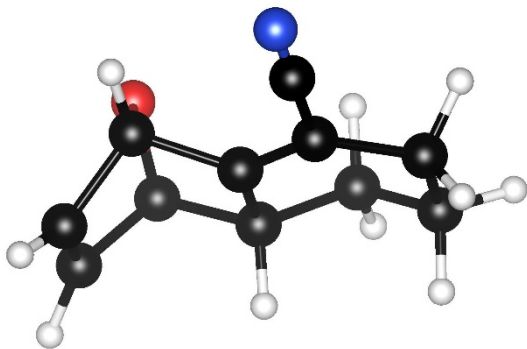

HF (M062X/6-31+G(d,p)) = -555.4969357 Hartrees

Imaginary Frequencies: none found

Zero-point correction = 0.199055 (Hartree/Particle)

Thermal correction = 0.163698 Hartrees

Coordinates from last standard orientation:

| Center<br>Number | Atomic<br>Number | Atomic<br>Type | Coordinates (Angstroms) |           |           |
|------------------|------------------|----------------|-------------------------|-----------|-----------|
|                  |                  |                | X                       | Y         | Z         |
| 1                | 6                | 0              | -0.652721               | 1.073635  | -0.253837 |
| 2                | 6                | 0              | 0.075687                | -0.252939 | -0.188583 |
| 3                | 6                | 0              | 1.410535                | -0.346491 | -0.185837 |
| 4                | 6                | 0              | 0.194269                | 2.130471  | 0.447984  |
| 5                | 6                | 0              | 1.541094                | 2.195124  | -0.286602 |
| 6                | 1                | 0              | 1.345572                | 2.466393  | -1.330656 |
| 7                | 6                | 0              | 2.319545                | 0.867254  | -0.241861 |
| 8                | 1                | 0              | 2.948800                | 0.831552  | 0.656042  |
| 9                | 1                | 0              | -0.298636               | 3.107148  | 0.413569  |
| 10               | 1                | 0              | 0.335557                | 1.857974  | 1.501304  |
| 11               | 1                | 0              | 2.170529                | 2.985172  | 0.132285  |
| 12               | 1                | 0              | 3.000199                | 0.794965  | -1.096471 |
| 13               | 6                | 0              | -0.970819               | -1.260292 | 0.278820  |
| 14               | 6                | 0              | -2.055197               | -1.337941 | -0.788647 |
| 15               | 6                | 0              | -2.713625               | -0.178873 | -0.711033 |
| 16               | 6                | 0              | -2.009503               | 0.619895  | 0.378774  |
| 17               | 8                | 0              | -1.591618               | -0.425925 | 1.272096  |
| 18               | 1                | 0              | -0.594516               | -2.186554 | 0.709699  |
| 19               | 1                | 0              | -2.174802               | -2.145896 | -1.498456 |
| 20               | 1                | 0              | -3.502906               | 0.194225  | -1.351494 |
| 21               | 1                | 0              | -2.573489               | 1.384933  | 0.909991  |
| 22               | 6                | 0              | 2.031628                | -1.627941 | 0.020130  |
| 23               | 7                | 0              | 2.552182                | -2.651926 | 0.178977  |
| 24               | 1                | 0              | -0.814002               | 1.389559  | -1.291260 |

**Enamine 15a**

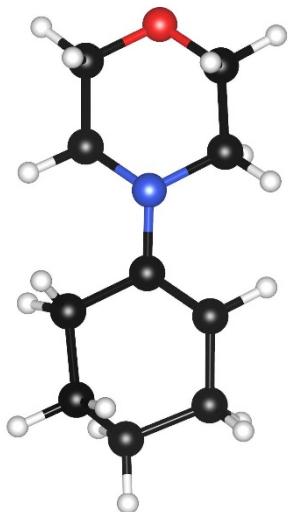

HF (M062X/6-31+G(d,p)) = -521.0482236 Hartrees

Imaginary Frequencies: none found

Zero-point correction = 0.264311 (Hartree/Particle)

Thermal correction = 0.228208 Hartrees

Coordinates from last standard orientation:

| Center<br>Number | Atomic<br>Number | Atomic<br>Type | Coordinates (Angstroms) |           |           |
|------------------|------------------|----------------|-------------------------|-----------|-----------|
|                  |                  |                | X                       | Y         | Z         |
| 1                | 6                | 0              | 1.373528                | 1.195389  | -0.168792 |
| 2                | 6                | 0              | 0.703961                | 0.052494  | 0.073064  |
| 3                | 6                | 0              | 1.429893                | -1.265284 | 0.261604  |
| 4                | 6                | 0              | 2.906014                | -1.063046 | 0.603056  |
| 5                | 6                | 0              | 3.542697                | -0.082104 | -0.378507 |
| 6                | 6                | 0              | 2.878026                | 1.287681  | -0.249811 |
| 7                | 1                | 0              | 0.927733                | -1.832693 | 1.053842  |
| 8                | 1                | 0              | 2.995415                | -0.664559 | 1.622361  |
| 9                | 1                | 0              | 3.423334                | -2.027713 | 0.585661  |
| 10               | 1                | 0              | 4.620524                | 0.001920  | -0.205241 |
| 11               | 1                | 0              | 3.406561                | -0.461911 | -1.399980 |
| 12               | 1                | 0              | 3.262201                | 1.798787  | 0.645591  |
| 13               | 1                | 0              | 3.155773                | 1.923590  | -1.098593 |
| 14               | 1                | 0              | 1.355250                | -1.867684 | -0.654164 |
| 15               | 1                | 0              | 0.831684                | 2.127886  | -0.292270 |
| 16               | 6                | 0              | -1.430088               | 1.238341  | 0.122560  |
| 17               | 6                | 0              | -1.357260               | -1.066078 | -0.549202 |
| 18               | 6                | 0              | -2.887641               | 1.035026  | 0.506039  |
| 19               | 1                | 0              | -1.371066               | 1.642594  | -0.904565 |
| 20               | 1                | 0              | -0.987949               | 1.971871  | 0.803256  |
| 21               | 6                | 0              | -2.815244               | -1.195596 | -0.141806 |
| 22               | 1                | 0              | -1.297567               | -0.832885 | -1.627729 |
| 23               | 1                | 0              | -0.861475               | -2.024046 | -0.379713 |
| 24               | 1                | 0              | -3.451001               | 1.957397  | 0.348516  |
| 25               | 1                | 0              | -2.954414               | 0.750713  | 1.567428  |
| 26               | 1                | 0              | -3.324189               | -1.922831 | -0.778359 |
| 27               | 1                | 0              | -2.877957               | -1.528070 | 0.905955  |
| 28               | 7                | 0              | -0.700549               | -0.016775 | 0.237259  |

29            8            0            -3.501541    0.035514    -0.290253

---

### Transition state of trapping Allene 7a with Enamine 15a

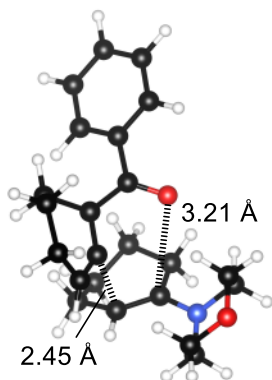

HF (M062X/6-31+G(d,p)) = -1098.5687231 Hartrees

Imaginary Frequencies: 1 (-164.98 cm<sup>-1</sup>)

Zero-point correction = 0.479750 (Hartree/Particle)

Thermal correction = 0.427048 Hartrees

Coordinates from last standard orientation:

---

| Center<br>Number | Atomic<br>Number | Atomic<br>Type | Coordinates (Angstroms) |           |           |
|------------------|------------------|----------------|-------------------------|-----------|-----------|
|                  |                  |                | X                       | Y         | Z         |
| 1                | 6                | 0              | -4.897851               | -0.652235 | 0.327124  |
| 2                | 6                | 0              | -5.462079               | -0.769448 | -0.943559 |
| 3                | 6                | 0              | -4.679306               | -0.549080 | -2.078020 |
| 4                | 6                | 0              | -3.334431               | -0.215679 | -1.940785 |
| 5                | 6                | 0              | -2.768345               | -0.074846 | -0.669826 |
| 6                | 6                | 0              | -3.557252               | -0.297220 | 0.464197  |
| 7                | 1                | 0              | -5.500715               | -0.839497 | 1.210226  |
| 8                | 1                | 0              | -6.508726               | -1.037829 | -1.049487 |
| 9                | 1                | 0              | -5.116620               | -0.644120 | -3.067013 |
| 10               | 1                | 0              | -2.707247               | -0.058358 | -2.813147 |
| 11               | 1                | 0              | -3.115226               | -0.211828 | 1.454054  |
| 12               | 6                | 0              | -1.303797               | 0.237227  | -0.559508 |
| 13               | 6                | 0              | -0.829323               | 1.054236  | 0.550856  |
| 14               | 8                | 0              | -0.527853               | -0.240429 | -1.393858 |
| 15               | 6                | 0              | 0.488582                | 1.273245  | 0.745730  |
| 16               | 6                | 0              | 1.193787                | 2.333905  | 1.086441  |
| 17               | 6                | 0              | -1.615120               | 2.159332  | 1.255181  |
| 18               | 6                | 0              | -1.063105               | 3.493345  | 0.686618  |
| 19               | 1                | 0              | -1.329633               | 3.524984  | -0.375545 |
| 20               | 6                | 0              | 0.470953                | 3.660793  | 0.839224  |
| 21               | 1                | 0              | 0.695861                | 4.276855  | 1.718059  |
| 22               | 1                | 0              | -2.686688               | 2.095648  | 1.049153  |
| 23               | 1                | 0              | -1.474687               | 2.116268  | 2.341265  |
| 24               | 1                | 0              | -1.564399               | 4.341440  | 1.165986  |
| 25               | 1                | 0              | 0.878607                | 4.194116  | -0.026104 |
| 26               | 1                | 0              | 2.112204                | 2.326677  | 1.664007  |
| 27               | 6                | 0              | -0.252485               | -2.524496 | 1.356713  |
| 28               | 6                | 0              | 0.826404                | -2.463421 | 0.274493  |

---

|    |   |   |           |           |           |
|----|---|---|-----------|-----------|-----------|
| 29 | 6 | 0 | 1.830424  | -1.346548 | 0.490428  |
| 30 | 6 | 0 | 1.808029  | -0.595127 | 1.636011  |
| 31 | 6 | 0 | 0.959808  | -0.937574 | 2.839843  |
| 32 | 6 | 0 | 0.358215  | -2.339045 | 2.742053  |
| 33 | 1 | 0 | -0.992783 | -1.732590 | 1.186176  |
| 34 | 1 | 0 | 1.399282  | -3.401902 | 0.264708  |
| 35 | 1 | 0 | 1.567570  | -0.844194 | 3.747612  |
| 36 | 1 | 0 | -0.394882 | -2.482251 | 3.523840  |
| 37 | 1 | 0 | 2.584935  | 0.147027  | 1.788183  |
| 38 | 1 | 0 | 0.139804  | -0.209962 | 2.937850  |
| 39 | 1 | 0 | 1.140687  | -3.093445 | 2.899523  |
| 40 | 1 | 0 | -0.781991 | -3.479579 | 1.279157  |
| 41 | 1 | 0 | 0.348989  | -2.370032 | -0.701221 |
| 42 | 6 | 0 | 4.083185  | -0.556540 | -0.202480 |
| 43 | 6 | 0 | 2.537684  | -1.280925 | -1.892454 |
| 44 | 6 | 0 | 4.084033  | 0.843166  | -0.805402 |
| 45 | 1 | 0 | 4.881598  | -1.135080 | -0.687232 |
| 46 | 1 | 0 | 4.287115  | -0.532603 | 0.869408  |
| 47 | 6 | 0 | 2.557880  | 0.143127  | -2.443158 |
| 48 | 1 | 0 | 3.303899  | -1.882819 | -2.398476 |
| 49 | 1 | 0 | 1.560430  | -1.723153 | -2.077429 |
| 50 | 1 | 0 | 5.066451  | 1.310600  | -0.699149 |
| 51 | 1 | 0 | 3.326055  | 1.470876  | -0.315119 |
| 52 | 1 | 0 | 2.417886  | 0.138298  | -3.527436 |
| 53 | 1 | 0 | 1.748739  | 0.717294  | -1.970769 |
| 54 | 8 | 0 | 3.812946  | 0.769878  | -2.198722 |
| 55 | 7 | 0 | 2.831057  | -1.256225 | -0.458394 |

**Product 16a**

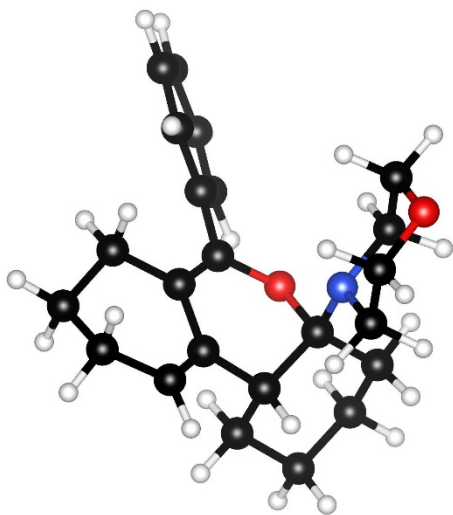

HF (M062X/6-31+G(d,p)) = -1098.689286 Hartrees  
 Imaginary Frequencies: none found  
 Zero-point correction = 0.485730 (Hartree/Particle)  
 Thermal correction = 0.435890 Hartrees

Coordinates from last standard orientation:

| Center<br>Number | Atomic<br>Number | Atomic<br>Type | Coordinates (Angstroms) |           |           |
|------------------|------------------|----------------|-------------------------|-----------|-----------|
|                  |                  |                | X                       | Y         | Z         |
| 1                | 6                | 0              | 1.469847                | -0.388207 | 3.459037  |
| 2                | 6                | 0              | 1.729244                | -1.147253 | 2.156119  |
| 3                | 6                | 0              | 1.167251                | -0.429996 | 0.925926  |
| 4                | 6                | 0              | 1.631782                | 1.032852  | 0.847076  |
| 5                | 6                | 0              | 1.323576                | 1.760478  | 2.169319  |
| 6                | 6                | 0              | 1.964921                | 1.053959  | 3.362469  |
| 7                | 6                | 0              | 0.929355                | 1.704347  | -0.306577 |
| 8                | 6                | 0              | -0.479757               | 1.332235  | -0.508605 |
| 9                | 6                | 0              | -0.997477               | 0.310868  | 0.209995  |
| 10               | 6                | 0              | -1.256689               | 2.108557  | -1.551514 |
| 11               | 1                | 0              | -2.319332               | 2.142540  | -1.293536 |
| 12               | 6                | 0              | -0.703970               | 3.524944  | -1.723915 |
| 13               | 6                | 0              | 0.786460                | 3.483127  | -2.062740 |
| 14               | 6                | 0              | 1.526608                | 2.655079  | -1.046456 |
| 15               | 1                | 0              | 0.392599                | -0.388347 | 3.665547  |
| 16               | 1                | 0              | 2.810657                | -1.265824 | 2.003463  |
| 17               | 1                | 0              | 1.686338                | 2.790207  | 2.082594  |
| 18               | 1                | 0              | 1.742150                | 1.597358  | 4.286878  |
| 19               | 1                | 0              | -1.262519               | 4.047857  | -2.506385 |
| 20               | 1                | 0              | 0.928821                | 3.070045  | -3.072241 |
| 21               | 1                | 0              | 2.580290                | 2.871224  | -0.870611 |
| 22               | 6                | 0              | -2.397597               | -0.176191 | 0.188518  |
| 23               | 6                | 0              | -3.106221               | -0.359670 | -1.004920 |
| 24               | 6                | 0              | -3.020526               | -0.505554 | 1.401639  |
| 25               | 6                | 0              | -4.416362               | -0.836884 | -0.984193 |
| 26               | 1                | 0              | -2.624434               | -0.153002 | -1.955081 |
| 27               | 6                | 0              | -4.330098               | -0.975605 | 1.421532  |
| 28               | 1                | 0              | -2.468339               | -0.386404 | 2.329079  |
| 29               | 6                | 0              | -5.034651               | -1.140325 | 0.227604  |
| 30               | 1                | 0              | -4.949654               | -0.979500 | -1.919051 |
| 31               | 1                | 0              | -4.802165               | -1.214976 | 2.369582  |
| 32               | 1                | 0              | -6.055462               | -1.509214 | 0.242602  |
| 33               | 8                | 0              | -0.254744               | -0.417362 | 1.113164  |
| 34               | 1                | 0              | -1.181113               | 1.594010  | -2.521084 |
| 35               | 1                | 0              | -0.841174               | 4.084165  | -0.789879 |
| 36               | 1                | 0              | 1.203079                | 4.495939  | -2.086138 |
| 37               | 1                | 0              | 2.717782                | 1.072357  | 0.705085  |
| 38               | 1                | 0              | 0.235736                | 1.810647  | 2.308752  |
| 39               | 1                | 0              | 3.057702                | 1.059084  | 3.242709  |
| 40               | 1                | 0              | 1.957632                | -0.910115 | 4.289064  |
| 41               | 1                | 0              | 1.294744                | -2.150448 | 2.210029  |
| 42               | 6                | 0              | 2.770836                | -1.063568 | -0.878127 |
| 43               | 6                | 0              | 0.927398                | -2.501301 | -0.387981 |
| 44               | 6                | 0              | 2.759807                | -1.593755 | -2.305929 |
| 45               | 1                | 0              | 3.485934                | -1.656084 | -0.277604 |
| 46               | 1                | 0              | 3.120910                | -0.029963 | -0.914636 |
| 47               | 6                | 0              | 0.941686                | -2.979198 | -1.830804 |
| 48               | 1                | 0              | 1.554506                | -3.185760 | 0.211238  |
| 49               | 1                | 0              | -0.094174               | -2.533865 | 0.001374  |
| 50               | 1                | 0              | 3.773540                | -1.624915 | -2.712021 |
| 51               | 1                | 0              | 2.139500                | -0.930930 | -2.929342 |
| 52               | 1                | 0              | 0.624469                | -4.022518 | -1.896902 |
| 53               | 1                | 0              | 0.263671                | -2.355045 | -2.433255 |
| 54               | 8                | 0              | 2.253589                | -2.916691 | -2.370680 |
| 55               | 7                | 0              | 1.417858                | -1.125674 | -0.339277 |

---

### Transition state of Allene 7a [2+2] dimerization

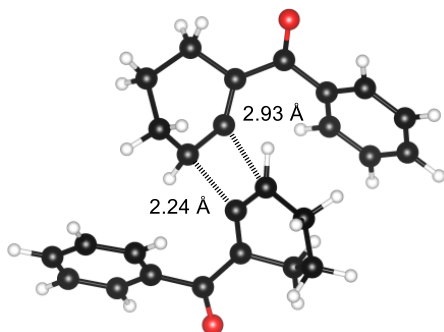

HF (M062X/6-31+G(d,p)) = -1155.0522239 Hartrees

Imaginary Frequencies: 1 (-171.76 cm<sup>-1</sup>)

Zero-point correction = 0.429073 (Hartree/Particle)

Thermal correction = 0.373502 Hartrees

Coordinates from last standard orientation:

---

| Center Number | Atomic Number | Atomic Type | Coordinates (Angstroms) |           |           |
|---------------|---------------|-------------|-------------------------|-----------|-----------|
|               |               |             | X                       | Y         | Z         |
| 1             | 6             | 0           | 3.395960                | -1.660030 | -1.571462 |
| 2             | 6             | 0           | 4.296028                | -2.185334 | -0.645148 |
| 3             | 6             | 0           | 4.794946                | -1.378091 | 0.379390  |
| 4             | 6             | 0           | 4.390702                | -0.050691 | 0.476337  |
| 5             | 6             | 0           | 3.463642                | 0.473396  | -0.433949 |
| 6             | 6             | 0           | 2.970267                | -0.336782 | -1.462750 |
| 7             | 1             | 0           | 3.021904                | -2.281007 | -2.379388 |
| 8             | 1             | 0           | 4.615391                | -3.219846 | -0.725530 |
| 9             | 1             | 0           | 5.498426                | -1.783981 | 1.099329  |
| 10            | 1             | 0           | 4.773062                | 0.591577  | 1.263759  |
| 11            | 1             | 0           | 2.274086                | 0.065955  | -2.190778 |
| 12            | 6             | 0           | 3.034760                | 1.893473  | -0.233514 |
| 13            | 6             | 0           | 1.630403                | 2.263509  | -0.533379 |
| 14            | 8             | 0           | 3.807596                | 2.719836  | 0.233256  |
| 15            | 6             | 0           | 0.630537                | 1.414817  | -0.700599 |
| 16            | 6             | 0           | -0.658648               | 1.345044  | -0.369832 |
| 17            | 6             | 0           | 1.135684                | 3.692335  | -0.271210 |
| 18            | 6             | 0           | -0.348177               | 3.721193  | 0.179462  |
| 19            | 1             | 0           | -0.471550               | 4.502029  | 0.936899  |
| 20            | 6             | 0           | -0.880173               | 2.378069  | 0.746189  |
| 21            | 1             | 0           | -1.940281               | 2.456604  | 1.000168  |
| 22            | 1             | 0           | 1.793281                | 4.066475  | 0.521822  |
| 23            | 1             | 0           | 1.284396                | 4.342238  | -1.138379 |
| 24            | 1             | 0           | -0.983191               | 3.998918  | -0.668128 |
| 25            | 1             | 0           | -0.327579               | 2.088470  | 1.645453  |
| 26            | 1             | 0           | -1.461042               | 1.098888  | -1.058658 |
| 27            | 6             | 0           | -4.410695               | 0.992655  | 1.149636  |
| 28            | 6             | 0           | -5.361700               | 1.253238  | 0.163357  |
| 29            | 6             | 0           | -5.364146               | 0.506517  | -1.016192 |
| 30            | 6             | 0           | -4.419864               | -0.499030 | -1.203016 |



|    |   |   |           |           |           |
|----|---|---|-----------|-----------|-----------|
| 31 | 6 | 0 | -3.449399 | -0.749854 | -0.226464 |
| 32 | 6 | 0 | -3.449152 | 0.001471  | 0.953089  |
| 33 | 1 | 0 | -4.415964 | 1.562091  | 2.074184  |
| 34 | 1 | 0 | -6.103258 | 2.031277  | 0.315773  |
| 35 | 1 | 0 | -6.105360 | 0.703196  | -1.784415 |
| 36 | 1 | 0 | -4.420798 | -1.100695 | -2.106659 |
| 37 | 1 | 0 | -2.711122 | -0.196637 | 1.725050  |
| 38 | 6 | 0 | -2.478130 | -1.868627 | -0.477475 |
| 39 | 6 | 0 | -1.081608 | -1.729342 | -0.082695 |
| 40 | 8 | 0 | -2.874857 | -2.876761 | -1.066503 |
| 41 | 6 | 0 | -0.494018 | -0.692371 | 0.554867  |
| 42 | 6 | 0 | 0.553183  | -0.663300 | 1.374233  |
| 43 | 6 | 0 | -0.124099 | -2.908765 | -0.151105 |
| 44 | 6 | 0 | 0.293975  | -3.203693 | 1.309478  |
| 45 | 1 | 0 | -0.597494 | -3.548683 | 1.844197  |
| 46 | 6 | 0 | 0.898511  | -1.979961 | 2.046586  |
| 47 | 1 | 0 | 1.995645  | -2.023292 | 2.014750  |
| 48 | 1 | 0 | -0.619721 | -3.776735 | -0.592101 |
| 49 | 1 | 0 | 0.755327  | -2.662889 | -0.756557 |
| 50 | 1 | 0 | 1.018911  | -4.024547 | 1.332480  |
| 51 | 1 | 0 | 0.622211  | -1.994596 | 3.106353  |
| 52 | 1 | 0 | 1.230088  | 0.181535  | 1.463351  |

### Transition state of Allene 7a [2+2] cycloadduct

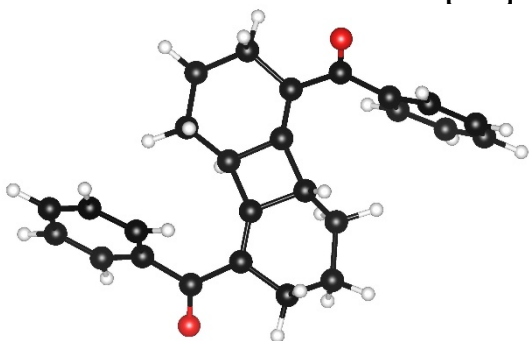

HF (M062X/6-31+G(d,p)) = -1155.1972599 Hartrees

Imaginary Frequencies: none found

Zero-point correction = 0.435416 (Hartree/Particle)

Thermal correction = 0.380774 Hartrees

Coordinates from last standard orientation:

| Center Number | Atomic Number | Atomic Type | Coordinates (Angstroms) |           |           |
|---------------|---------------|-------------|-------------------------|-----------|-----------|
|               |               |             | X                       | Y         | Z         |
| 1             | 6             | 0           | -4.793701               | -0.978148 | 1.316908  |
| 2             | 6             | 0           | -5.639195               | -1.370019 | 0.280524  |
| 3             | 6             | 0           | -5.552292               | -0.748819 | -0.968292 |
| 4             | 6             | 0           | -4.630983               | 0.273084  | -1.172251 |
| 5             | 6             | 0           | -3.763067               | 0.652616  | -0.141620 |
| 6             | 6             | 0           | -3.843417               | 0.020032  | 1.102665  |
| 7             | 1             | 0           | -4.866812               | -1.454387 | 2.289612  |

|    |   |   |           |           |           |
|----|---|---|-----------|-----------|-----------|
| 8  | 1 | 0 | -6.369518 | -2.156395 | 0.444138  |
| 9  | 1 | 0 | -6.209874 | -1.055502 | -1.775455 |
| 10 | 1 | 0 | -4.568010 | 0.783907  | -2.128384 |
| 11 | 1 | 0 | -3.174521 | 0.317592  | 1.904942  |
| 12 | 6 | 0 | -2.831228 | 1.800656  | -0.373856 |
| 13 | 6 | 0 | -1.481710 | 1.795772  | 0.249547  |
| 14 | 8 | 0 | -3.187283 | 2.743638  | -1.070334 |
| 15 | 6 | 0 | -0.762071 | 0.671563  | 0.368608  |
| 16 | 6 | 0 | 0.735409  | 0.622845  | 0.634563  |
| 17 | 6 | 0 | -0.835499 | 3.142959  | 0.495670  |
| 18 | 6 | 0 | 0.615963  | 3.046650  | 0.986026  |
| 19 | 1 | 0 | 1.103764  | 4.015901  | 0.846123  |
| 20 | 6 | 0 | 1.407205  | 1.943642  | 0.269510  |
| 21 | 1 | 0 | 2.458334  | 1.955232  | 0.571705  |
| 22 | 1 | 0 | -0.876973 | 3.691271  | -0.453660 |
| 23 | 1 | 0 | -1.437285 | 3.726137  | 1.202558  |
| 24 | 1 | 0 | 0.628933  | 2.838974  | 2.063615  |
| 25 | 1 | 0 | 1.369809  | 2.093507  | -0.817300 |
| 26 | 1 | 0 | 0.965975  | 0.378513  | 1.682472  |
| 27 | 6 | 0 | 4.567847  | 1.289143  | -1.337119 |
| 28 | 6 | 0 | 5.529628  | 1.505256  | -0.350979 |
| 29 | 6 | 0 | 5.623954  | 0.636469  | 0.739193  |
| 30 | 6 | 0 | 4.764841  | -0.453649 | 0.834346  |
| 31 | 6 | 0 | 3.781328  | -0.658431 | -0.140128 |
| 32 | 6 | 0 | 3.682412  | 0.218438  | -1.224555 |
| 33 | 1 | 0 | 4.499558  | 1.959754  | -2.187884 |
| 34 | 1 | 0 | 6.208683  | 2.348484  | -0.431435 |
| 35 | 1 | 0 | 6.372529  | 0.805741  | 1.506554  |
| 36 | 1 | 0 | 4.840320  | -1.150932 | 1.663272  |
| 37 | 1 | 0 | 2.921566  | 0.056828  | -1.982663 |
| 38 | 6 | 0 | 2.903522  | -1.864968 | -0.035164 |
| 39 | 6 | 0 | 1.476781  | -1.755834 | -0.419404 |
| 40 | 8 | 0 | 3.356881  | -2.924072 | 0.381166  |
| 41 | 6 | 0 | 0.726236  | -0.672751 | -0.175405 |
| 42 | 6 | 0 | -0.789636 | -0.727839 | -0.241149 |
| 43 | 6 | 0 | 0.703859  | -2.973951 | -0.867190 |
| 44 | 6 | 0 | -0.533143 | -3.239992 | 0.035666  |
| 45 | 1 | 0 | -1.248179 | -3.837129 | -0.538016 |
| 46 | 6 | 0 | -1.226738 | -1.962863 | 0.571933  |
| 47 | 1 | 0 | -0.947219 | -1.790666 | 1.618151  |
| 48 | 1 | 0 | 0.362739  | -2.810606 | -1.896536 |
| 49 | 1 | 0 | 1.354277  | -3.851149 | -0.876648 |
| 50 | 1 | 0 | -0.219183 | -3.854169 | 0.884526  |
| 51 | 1 | 0 | -2.312985 | -2.073690 | 0.541844  |
| 52 | 1 | 0 | -1.230535 | -0.764922 | -1.246476 |

-----

**Transition state: Nucleophilic attack of Enamine 15a on Allene 7a**

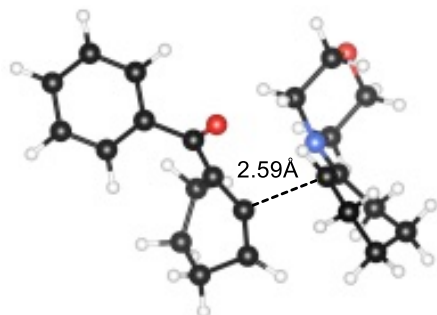

HF (M062X/6-31+G(d,p)) = -1098.5691451 Hartrees

Imaginary Frequencies: 1 (-125.20 cm<sup>-1</sup>)

Zero-point correction = 0.479276 (Hartree/Particle)

Thermal correction = 0.425119 Hartrees

Coordinates from last standard orientation:

| Center<br>Number | Atomic<br>Number | Atomic<br>Type | Coordinates (Angstroms) |           |           |
|------------------|------------------|----------------|-------------------------|-----------|-----------|
|                  |                  |                | X                       | Y         | Z         |
| 1                | 6                | 0              | 5.358757                | 0.412520  | -0.420967 |
| 2                | 6                | 0              | 5.918507                | -0.744193 | 0.122561  |
| 3                | 6                | 0              | 5.134417                | -1.605488 | 0.891853  |
| 4                | 6                | 0              | 3.793732                | -1.306953 | 1.120827  |
| 5                | 6                | 0              | 3.222445                | -0.160474 | 0.560480  |
| 6                | 6                | 0              | 4.011434                | 0.699050  | -0.210636 |
| 7                | 1                | 0              | 5.971200                | 1.090243  | -1.007189 |
| 8                | 1                | 0              | 6.966034                | -0.971322 | -0.049626 |
| 9                | 1                | 0              | 5.569971                | -2.504016 | 1.317391  |
| 10               | 1                | 0              | 3.175673                | -1.955700 | 1.734246  |
| 11               | 1                | 0              | 3.577910                | 1.606380  | -0.624385 |
| 12               | 6                | 0              | 1.791735                | 0.163619  | 0.876867  |
| 13               | 6                | 0              | 0.945058                | 0.775928  | -0.144432 |
| 14               | 8                | 0              | 1.352004                | -0.097564 | 1.998585  |
| 15               | 6                | 0              | -0.064934               | 1.610395  | 0.148073  |
| 16               | 6                | 0              | -0.490076               | 2.716387  | -0.426826 |
| 17               | 6                | 0              | 1.173862                | 0.781516  | -1.657176 |
| 18               | 6                | 0              | 1.244381                | 2.246437  | -2.200290 |
| 19               | 1                | 0              | 2.287583                | 2.513188  | -2.400705 |
| 20               | 6                | 0              | 0.635320                | 3.334294  | -1.256497 |
| 21               | 1                | 0              | 0.260775                | 4.176845  | -1.844052 |
| 22               | 1                | 0              | 2.078410                | 0.227521  | -1.922194 |
| 23               | 1                | 0              | 0.332316                | 0.263080  | -2.126865 |
| 24               | 1                | 0              | 0.723374                | 2.284547  | -3.161308 |
| 25               | 1                | 0              | 1.415948                | 3.720117  | -0.594553 |
| 26               | 1                | 0              | -1.516332               | 3.058328  | -0.489891 |
| 27               | 6                | 0              | -4.608994               | 1.249075  | 0.517696  |
| 28               | 6                | 0              | -3.705385               | 0.495497  | -0.459674 |
| 29               | 6                | 0              | -2.444753               | -0.034766 | 0.199749  |
| 30               | 6                | 0              | -2.031868               | 0.467708  | 1.396086  |
| 31               | 6                | 0              | -2.754856               | 1.549868  | 2.159034  |
| 32               | 6                | 0              | -3.813942               | 2.267444  | 1.324695  |
| 33               | 1                | 0              | -5.420142               | 1.730527  | -0.037928 |
| 34               | 1                | 0              | -4.275789               | -0.335074 | -0.887138 |
| 35               | 1                | 0              | -3.230740               | 1.115764  | 3.051192  |

|    |   |   |           |           |           |
|----|---|---|-----------|-----------|-----------|
| 36 | 1 | 0 | -3.336617 | 2.975645  | 0.636138  |
| 37 | 1 | 0 | -1.170661 | 0.044317  | 1.901395  |
| 38 | 1 | 0 | -2.018147 | 2.271676  | 2.533982  |
| 39 | 1 | 0 | -4.474361 | 2.853342  | 1.972282  |
| 40 | 1 | 0 | -5.071498 | 0.528477  | 1.205083  |
| 41 | 1 | 0 | -3.432060 | 1.148445  | -1.301561 |
| 42 | 6 | 0 | -2.218956 | -1.605534 | -1.730014 |
| 43 | 6 | 0 | -0.827186 | -1.917847 | 0.180016  |
| 44 | 6 | 0 | -2.943505 | -2.910577 | -1.408972 |
| 45 | 1 | 0 | -1.354717 | -1.834824 | -2.367826 |
| 46 | 1 | 0 | -2.860789 | -0.924155 | -2.288159 |
| 47 | 6 | 0 | -1.580953 | -3.208194 | 0.485895  |
| 48 | 1 | 0 | 0.020336  | -2.141255 | -0.482782 |
| 49 | 1 | 0 | -0.421014 | -1.479112 | 1.089559  |
| 50 | 1 | 0 | -3.250791 | -3.428246 | -2.321261 |
| 51 | 1 | 0 | -3.836104 | -2.702496 | -0.796423 |
| 52 | 1 | 0 | -0.923636 | -3.950590 | 0.945114  |
| 53 | 1 | 0 | -2.415970 | -2.993999 | 1.171861  |
| 54 | 8 | 0 | -2.083997 | -3.797261 | -0.708092 |
| 55 | 7 | 0 | -1.711381 | -0.983331 | -0.512632 |

**Intermediate: Nucleophilic attack of Enamine 15a on Allene 7a**

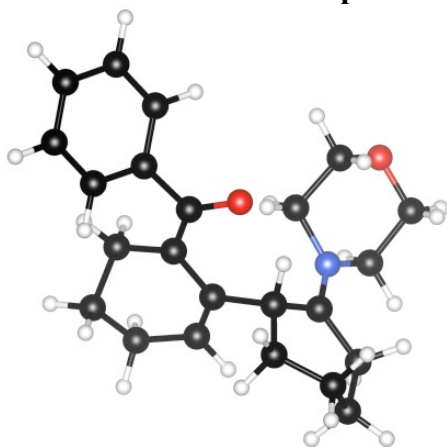

HF (M062X/6-31+G(d,p)) = -1098.630231 Hartrees

Imaginary Frequencies: none found

Zero-point correction = 0.483149 (Hartree/Particle)

Thermal correction = 0.428032 Hartrees

Coordinates from last standard orientation:

| Center Number | Atomic Number | Atomic Type | Coordinates (Angstroms) |           |          |
|---------------|---------------|-------------|-------------------------|-----------|----------|
|               |               |             | X                       | Y         | Z        |
| 1             | 6             | 0           | 5.517758                | 0.294225  | 0.605198 |
| 2             | 6             | 0           | 5.905596                | -1.043915 | 0.533057 |
| 3             | 6             | 0           | 4.931264                | -2.040201 | 0.451926 |
| 4             | 6             | 0           | 3.580373                | -1.696682 | 0.445834 |
| 5             | 6             | 0           | 3.180328                | -0.357322 | 0.495337 |
| 6             | 6             | 0           | 4.164506                | 0.633053  | 0.581820 |
| 7             | 1             | 0           | 6.269255                | 1.074763  | 0.682430 |

|    |   |   |           |           |           |
|----|---|---|-----------|-----------|-----------|
| 8  | 1 | 0 | 6.958565  | -1.308982 | 0.546414  |
| 9  | 1 | 0 | 5.225341  | -3.084665 | 0.399878  |
| 10 | 1 | 0 | 2.817469  | -2.469992 | 0.405777  |
| 11 | 1 | 0 | 3.862382  | 1.676782  | 0.633489  |
| 12 | 6 | 0 | 1.702594  | -0.033677 | 0.562210  |
| 13 | 6 | 0 | 1.135321  | 0.777140  | -0.423636 |
| 14 | 8 | 0 | 1.098496  | -0.593290 | 1.549995  |
| 15 | 6 | 0 | -0.256469 | 1.207600  | -0.423369 |
| 16 | 6 | 0 | -0.793160 | 1.972115  | -1.409584 |
| 17 | 6 | 0 | 1.874510  | 1.123094  | -1.704952 |
| 18 | 6 | 0 | 1.498996  | 2.512744  | -2.226450 |
| 19 | 1 | 0 | 1.729574  | 3.257759  | -1.453591 |
| 20 | 6 | 0 | 0.004515  | 2.559904  | -2.544869 |
| 21 | 1 | 0 | -0.189636 | 2.018588  | -3.482996 |
| 22 | 1 | 0 | 2.955250  | 1.048027  | -1.575908 |
| 23 | 1 | 0 | 1.607995  | 0.393686  | -2.490837 |
| 24 | 1 | 0 | 2.086889  | 2.766569  | -3.115334 |
| 25 | 1 | 0 | -0.316459 | 3.594112  | -2.723413 |
| 26 | 1 | 0 | -1.843958 | 2.260570  | -1.339932 |
| 27 | 6 | 0 | -3.742172 | 2.198269  | 1.409674  |
| 28 | 6 | 0 | -3.814209 | 0.922853  | 0.566985  |
| 29 | 6 | 0 | -2.479174 | 0.282749  | 0.266401  |
| 30 | 6 | 0 | -1.179490 | 0.857749  | 0.757162  |
| 31 | 6 | 0 | -1.305983 | 2.050395  | 1.728888  |
| 32 | 6 | 0 | -2.642401 | 2.088630  | 2.459933  |
| 33 | 1 | 0 | -3.532559 | 3.061184  | 0.766758  |
| 34 | 1 | 0 | -4.411305 | 0.174971  | 1.104417  |
| 35 | 1 | 0 | -0.463738 | 1.990878  | 2.425471  |
| 36 | 1 | 0 | -2.673576 | 2.944614  | 3.140127  |
| 37 | 1 | 0 | -0.687481 | 0.051377  | 1.318394  |
| 38 | 1 | 0 | -1.195132 | 2.985447  | 1.168687  |
| 39 | 1 | 0 | -2.785664 | 1.184431  | 3.067830  |
| 40 | 1 | 0 | -4.724549 | 2.363766  | 1.859718  |
| 41 | 1 | 0 | -4.332919 | 1.113846  | -0.379851 |
| 42 | 6 | 0 | -3.660005 | -1.503456 | -0.953201 |
| 43 | 6 | 0 | -1.247712 | -1.631120 | -0.677214 |
| 44 | 6 | 0 | -3.754747 | -2.926640 | -0.410500 |
| 45 | 1 | 0 | -3.527493 | -1.525947 | -2.039663 |
| 46 | 1 | 0 | -4.563307 | -0.948071 | -0.719685 |
| 47 | 6 | 0 | -1.445791 | -3.051428 | -0.160599 |
| 48 | 1 | 0 | -1.107391 | -1.623636 | -1.763488 |
| 49 | 1 | 0 | -0.375089 | -1.192892 | -0.198737 |
| 50 | 1 | 0 | -4.599901 | -3.436358 | -0.875656 |
| 51 | 1 | 0 | -3.906911 | -2.898871 | 0.679041  |
| 52 | 1 | 0 | -0.582820 | -3.657416 | -0.440475 |
| 53 | 1 | 0 | -1.527468 | -3.033932 | 0.936282  |
| 54 | 8 | 0 | -2.591868 | -3.663407 | -0.722488 |
| 55 | 7 | 0 | -2.466441 | -0.843356 | -0.390788 |

-----

**Transition state: Formation of [2+2] adduct with Enamine 15a and Allene 7a**

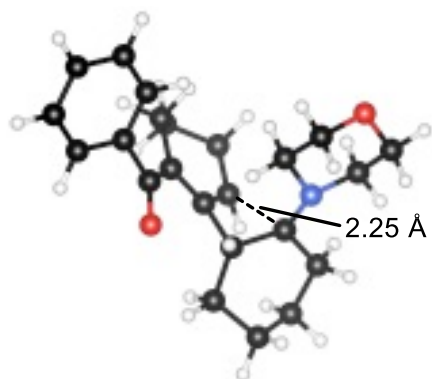

HF (M062X/6-31+G(d,p)) = -1098.6150561 Hartrees

Imaginary Frequencies: 1 (-353.13  $\text{cm}^{-1}$ )

Zero-point correction = 0.482486 (Hartree/Particle)

Thermal correction = 0.431290 Hartrees

Coordinates from last standard orientation:

| Center Number | Atomic Number | Atomic Type | Coordinates (Angstroms) |           |           |
|---------------|---------------|-------------|-------------------------|-----------|-----------|
|               |               |             | X                       | Y         | Z         |
| 1             | 6             | 0           | -5.507076               | 0.539199  | -0.969695 |
| 2             | 6             | 0           | -5.732996               | -0.722098 | -0.415551 |
| 3             | 6             | 0           | -4.669169               | -1.439406 | 0.131259  |
| 4             | 6             | 0           | -3.388032               | -0.888788 | 0.140597  |
| 5             | 6             | 0           | -3.153725               | 0.374378  | -0.411893 |
| 6             | 6             | 0           | -4.222001               | 1.076606  | -0.979340 |
| 7             | 1             | 0           | -6.332013               | 1.098945  | -1.400257 |
| 8             | 1             | 0           | -6.732790               | -1.145595 | -0.414684 |
| 9             | 1             | 0           | -4.835840               | -2.427046 | 0.550605  |
| 10            | 1             | 0           | -2.561602               | -1.453334 | 0.564671  |
| 11            | 1             | 0           | -4.032526               | 2.047165  | -1.428593 |
| 12            | 6             | 0           | -1.764297               | 0.957671  | -0.502341 |
| 13            | 6             | 0           | -0.908741               | 0.923530  | 0.646875  |
| 14            | 8             | 0           | -1.433787               | 1.444312  | -1.608350 |
| 15            | 6             | 0           | 0.451569                | 1.200265  | 0.506383  |
| 16            | 6             | 0           | 1.390253                | 1.156925  | 1.552333  |
| 17            | 6             | 0           | -1.397553               | 0.563718  | 2.037306  |
| 18            | 6             | 0           | -0.541291               | 1.225587  | 3.123837  |
| 19            | 1             | 0           | -0.643953               | 2.315396  | 3.048852  |
| 20            | 6             | 0           | 0.938472                | 0.850386  | 2.962686  |
| 21            | 1             | 0           | 1.060658                | -0.218367 | 3.187468  |
| 22            | 1             | 0           | -2.446658               | 0.850341  | 2.165439  |
| 23            | 1             | 0           | -1.357092               | -0.526906 | 2.199950  |
| 24            | 1             | 0           | -0.901244               | 0.928619  | 4.114625  |
| 25            | 1             | 0           | 1.552295                | 1.391176  | 3.690663  |
| 26            | 1             | 0           | 2.291635                | 1.752437  | 1.438228  |
| 27            | 6             | 0           | 4.059234                | 2.030151  | -0.575140 |
| 28            | 6             | 0           | 3.755199                | 0.568557  | -0.239056 |
| 29            | 6             | 0           | 2.280350                | 0.188137  | -0.268859 |
| 30            | 6             | 0           | 1.235447                | 1.164424  | -0.793543 |
| 31            | 6             | 0           | 1.740681                | 2.538571  | -1.274991 |
| 32            | 6             | 0           | 3.193668                | 2.508480  | -1.736224 |
| 33            | 1             | 0           | 3.881448                | 2.676433  | 0.293689  |

|    |   |   |           |           |           |
|----|---|---|-----------|-----------|-----------|
| 34 | 1 | 0 | 4.234939  | -0.054465 | -1.007396 |
| 35 | 1 | 0 | 1.067433  | 2.881623  | -2.064801 |
| 36 | 1 | 0 | 3.502313  | 3.506414  | -2.062064 |
| 37 | 1 | 0 | 0.657000  | 0.712835  | -1.602031 |
| 38 | 1 | 0 | 1.660640  | 3.260445  | -0.453437 |
| 39 | 1 | 0 | 3.314775  | 1.834530  | -2.595752 |
| 40 | 1 | 0 | 5.125231  | 2.106736  | -0.809185 |
| 41 | 1 | 0 | 4.204339  | 0.292146  | 0.718768  |
| 42 | 6 | 0 | 2.930270  | -2.078827 | 0.352815  |
| 43 | 6 | 0 | 0.661683  | -1.668228 | -0.357427 |
| 44 | 6 | 0 | 2.804494  | -3.481831 | -0.221387 |
| 45 | 1 | 0 | 2.669309  | -2.080701 | 1.423190  |
| 46 | 1 | 0 | 3.966002  | -1.761784 | 0.250854  |
| 47 | 6 | 0 | 0.629671  | -3.085339 | -0.907766 |
| 48 | 1 | 0 | 0.273053  | -1.657199 | 0.673789  |
| 49 | 1 | 0 | 0.017809  | -1.037512 | -0.970112 |
| 50 | 1 | 0 | 3.414465  | -4.172949 | 0.363504  |
| 51 | 1 | 0 | 3.157966  | -3.486355 | -1.263631 |
| 52 | 1 | 0 | -0.384962 | -3.481575 | -0.833481 |
| 53 | 1 | 0 | 0.935676  | -3.083099 | -1.964666 |
| 54 | 8 | 0 | 1.471464  | -3.950269 | -0.168146 |
| 55 | 7 | 0 | 2.031946  | -1.147588 | -0.343932 |

**Intermediate: Formation of [2+2] adduct with Enamine 15a and Allene 7a**

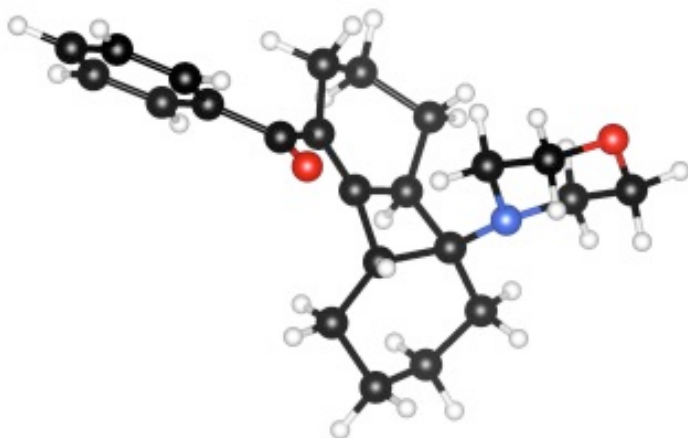

HF (M062X/6-31+G(d,p)) = -1098.6531182 Hartrees

Imaginary Frequencies: none found

Zero-point correction = 0.484799 (Hartree/Particle)

Thermal correction = 0.434081 Hartrees

Coordinates from last standard orientation:

| Center Number | Atomic Number | Atomic Type | Coordinates (Angstroms) |           |           |
|---------------|---------------|-------------|-------------------------|-----------|-----------|
|               |               |             | X                       | Y         | Z         |
| 1             | 6             | 0           | -5.439982               | 0.729523  | 0.570168  |
| 2             | 6             | 0           | -6.269718               | -0.143471 | -0.133698 |
| 3             | 6             | 0           | -5.717019               | -1.114512 | -0.971328 |
| 4             | 6             | 0           | -4.335256               | -1.208472 | -1.108764 |
| 5             | 6             | 0           | -3.498858               | -0.348009 | -0.390350 |

|    |   |   |           |           |           |
|----|---|---|-----------|-----------|-----------|
| 6  | 6 | 0 | -4.056226 | 0.620831  | 0.451038  |
| 7  | 1 | 0 | -5.869996 | 1.491319  | 1.212497  |
| 8  | 1 | 0 | -7.347831 | -0.065707 | -0.032000 |
| 9  | 1 | 0 | -6.364006 | -1.791855 | -1.519720 |
| 10 | 1 | 0 | -3.889221 | -1.946738 | -1.768182 |
| 11 | 1 | 0 | -3.406331 | 1.302628  | 0.993865  |
| 12 | 6 | 0 | -2.015859 | -0.437998 | -0.584710 |
| 13 | 6 | 0 | -1.119171 | -0.048456 | 0.541051  |
| 14 | 8 | 0 | -1.562670 | -0.818432 | -1.657298 |
| 15 | 6 | 0 | -0.007832 | 0.651549  | 0.294088  |
| 16 | 6 | 0 | 1.117061  | 0.904449  | 1.258409  |
| 17 | 6 | 0 | -1.371283 | -0.564137 | 1.949252  |
| 18 | 6 | 0 | -0.384648 | 0.005134  | 2.981817  |
| 19 | 1 | 0 | -0.665942 | 1.040597  | 3.214948  |
| 20 | 6 | 0 | 1.068657  | -0.009037 | 2.476214  |
| 21 | 1 | 0 | 1.342401  | -1.033655 | 2.207955  |
| 22 | 1 | 0 | -2.397516 | -0.358456 | 2.270095  |
| 23 | 1 | 0 | -1.281536 | -1.660586 | 1.924384  |
| 24 | 1 | 0 | -0.472349 | -0.566465 | 3.910892  |
| 25 | 1 | 0 | 1.757001  | 0.319752  | 3.261531  |
| 26 | 1 | 0 | 1.106563  | 1.954060  | 1.588922  |
| 27 | 6 | 0 | 2.772141  | 3.288331  | -0.329390 |
| 28 | 6 | 0 | 3.210810  | 1.850109  | -0.047516 |
| 29 | 6 | 0 | 2.073045  | 0.817441  | -0.000910 |
| 30 | 6 | 0 | 0.803335  | 1.120076  | -0.890914 |
| 31 | 6 | 0 | 0.555280  | 2.608031  | -1.210021 |
| 32 | 6 | 0 | 1.843887  | 3.354191  | -1.538498 |
| 33 | 1 | 0 | 2.254086  | 3.714014  | 0.541153  |
| 34 | 1 | 0 | 3.899751  | 1.538971  | -0.843458 |
| 35 | 1 | 0 | -0.167761 | 2.666260  | -2.029831 |
| 36 | 1 | 0 | 1.618059  | 4.393961  | -1.797036 |
| 37 | 1 | 0 | 0.739913  | 0.531150  | -1.808182 |
| 38 | 1 | 0 | 0.087027  | 3.099527  | -0.346884 |
| 39 | 1 | 0 | 2.335620  | 2.900374  | -2.410118 |
| 40 | 1 | 0 | 3.667326  | 3.898985  | -0.487224 |
| 41 | 1 | 0 | 3.768765  | 1.823734  | 0.895876  |
| 42 | 6 | 0 | 3.737680  | -0.939709 | 0.526911  |
| 43 | 6 | 0 | 1.723462  | -1.639100 | -0.537700 |
| 44 | 6 | 0 | 4.456765  | -2.115201 | -0.119781 |
| 45 | 1 | 0 | 3.394218  | -1.239341 | 1.532182  |
| 46 | 1 | 0 | 4.462205  | -0.132750 | 0.648051  |
| 47 | 6 | 0 | 2.495004  | -2.784118 | -1.177450 |
| 48 | 1 | 0 | 1.283546  | -2.009024 | 0.404779  |
| 49 | 1 | 0 | 0.896609  | -1.362988 | -1.194960 |
| 50 | 1 | 0 | 5.247722  | -2.487422 | 0.535933  |
| 51 | 1 | 0 | 4.901794  | -1.788285 | -1.072618 |
| 52 | 1 | 0 | 1.846424  | -3.653829 | -1.307821 |
| 53 | 1 | 0 | 2.878583  | -2.467999 | -2.159876 |
| 54 | 8 | 0 | 3.576010  | -3.199959 | -0.357105 |
| 55 | 7 | 0 | 2.631501  | -0.506825 | -0.328206 |

---



## 4. References

- (1) Zhao, Y.; Truhlar, D. G. The M06 Suite of Density Functionals for Main Group Thermochemistry, Thermochemical Kinetics, Noncovalent Interactions, Excited States, and Transition Elements: Two New Functionals and Systematic Testing of Four M06-Class Functionals and 12 Other Function. *Theor. Chem. Acc.* **2008**, *120* (1–3), 215–241.
- (2) Tomasi, J.; Mennucci, B.; Cammi, R. Quantum Mechanical Continuum Solvation Models. *Chem. Rev.* **2005**, *105* (8), 2999–3093.
- (3) Frisch, M. J., Trucks, G. W., Schlegel, H. B., Scuseria, G. E., Robb, M. A., Cheeseman, J. R., Scalmani, G., Barone, V., Mennucci, B., Petersson, G. A., Nakatsuji, H., Caricato, M., Li, X., Hratchian, H. P., Izmaylov, A. F., Bloino, J., Zheng, G., Sonnenberg, J. L., Hada, M., Ehara, M., Toyota, K., Fukuda, R., Hasegawa, J., Ishida, M., Nakajima, T., Honda, Y., Kitao, O., Nakai, H., Vreven, T., Montgomery, J. A., Jr., Peralta, J. E., Ogliaro, F., Bearpark, M., Heyd, J. J., Brothers, E., Kudin, K. N., Staroverov, V. N., Kobayashi, R., Normand, J., Raghavachari, K., Rendell, A., Burant, J. C., Iyengar, S. S., Tomasi, J., Cossi, M., Rega, N., Millam, J. M., Klene, M., Knox, J. E., Cross, J. B., Bakken, V., Adamo, C., Jaramillo, J., Gomperts, R., Stratmann, R. E., Yazyev, O., Austin, A. J., Cammi, R., Pomelli, C., Ochterski, J. W., Martin, R. L., Morokuma, K., Zakrzewski, V. G., Voth, G. A., Salvador, P., Dannenberg, J. J., Dapprich, S., Daniels, A. D., Farkas, Ö., Foresman, J. B., Ortiz, J. V., Cioslowski, J., Fox, D. J. *Gaussian 09*, revision E.01, Gaussian, Inc., Wallingford CT, USA, 2009.
- (4) Johnson, E. R.; Keinan, S.; Mori-Sánchez, P.; Contreras-García, J.; Cohen, A. J.; Yang, W. Revealing Noncovalent Interactions. *J. Am. Chem. Soc.* **2010**, *132* (18), 6498–6506.
- (5) Contreras-García, J.; Johnson, E. R.; Keinan, S.; Chaudret, R.; Piquemal, J.-P.; Beratan, D. N.; Yang, W. NCIPLOT: A Program for Plotting Non-Covalent Interaction Regions. *J. Chem. Theory Comput.* **2011**, *7* (3), 625–632. <https://doi.org/10.1021/ct100641a>.
- (6) Humphrey, W.; Dalke, A.; Schulten, K. VMD: Visual Molecular Dynamics. *J. Mol. Graph.* **1996**, *14* (1), 33–38.
- (7) Momma, K.; Izumi, F. VESTA 3 for Three-Dimensional Visualization of Crystal, Volumetric and Morphology Data. *J. Appl. Crystallogr.* **2011**, *44* (6), 1272–1276.
