# Supplementary material for: Generation and trapping of electron-deficient 1,2-cyclohexadienes. Unexpected hetero-Diels–Alder reactivity
Source: Royal Society of Chemistry journal article supplement (doi:10.1039/d0ob02285c), 2020-11-23
Supplement: d0ob02285c2.pdf [file d0ob02285c2.pdf]

# Generation and Trapping of Electron-Deficient 1,2-Cyclohexadienes. Unexpected Hetero-Diels-Alder Reactivity

Baolei Wang,<sup>a,b</sup> Marius-Georgian Constantin,<sup>a</sup> Simarpreet Singh,<sup>c</sup> Rebecca L. Davis,<sup>\*,c</sup> and F. G. West<sup>\*a</sup>

<sup>a</sup> Department of Chemistry, University of Alberta, E3-43 Gunning-Lemieux Chemistry Centre, Edmonton, AB, Canada, T6G 2G2. Tel: +1 780 492-8187; Fax: +1 780 492 8231.

<sup>b</sup> State-Key Laboratory of Elemento-Organic Chemistry, Collaborative Innovation Center of Chemical Science and Engineering, College of Chemistry, Nankai University, Tianjin 300071, P. R. China.

<sup>c</sup> Department of Chemistry, University of Manitoba, 360 Parker Bldg., 144 Dysart Rd., Winnipeg, MN, Canada R3T 2N2.

*frederick.west@ualberta.ca*

*rebecca.davis@umannitoba.ca*

## Electronic Supplementary Information, Part 1 (Experimental Details and Characterization Data)

### Table of Contents

|                                                                                        |       |
|----------------------------------------------------------------------------------------|-------|
| General Information.....                                                               | S-2   |
| Experimental Section.....                                                              | S-2   |
| General Procedure for the Synthesis of Intermediates.....                              | S-2   |
| General Synthetic Procedure for the Dimerization and Furan Trapping Products.....      | S-6   |
| General Procedure for the Synthesis of Enamine Cycloadducts <b>16a-16h</b> .....       | S-15  |
| References.....                                                                        | S-18  |
| <sup>1</sup> H, <sup>13</sup> C NMR, COSY, HSQC, HMBC, 2D-TROESY and HRMS Spectra..... | S-19  |
| X-ray Data for Product <b>12d</b> .....                                                | S-105 |
| X-ray Data for Product <b>13d</b> .....                                                | S-118 |
| X-ray Data for Product <b>16a</b> .....                                                | S-127 |

**General Information.** Reactions were carried out in oven-dried glassware under a nitrogen atmosphere unless otherwise stated. Transfer of anhydrous solvents and reagents was accomplished with oven-dried syringes. Solvents were purified by usual methods before use. Thin layer chromatography was performed on glass plates precoated with 0.25 mm Kieselgel 60 F254 (Merck). Flash chromatography columns were packed with 230-400 mesh silica gel (Silicycle). Proton nuclear magnetic resonance spectra ( $^1\text{H}$  NMR) were recorded at 500 MHz and coupling constants ( $J$ ) are reported in Hertz (Hz). Standard notation is used to describe the multiplicity of signals observed in  $^1\text{H}$  NMR spectra: broad (br), multiplet (m), singlet (s), doublet (d), triplet (t), quartet (q), etc. Carbon nuclear magnetic resonance spectra ( $^{13}\text{C}$  NMR) were recorded at 125 MHz. The chemical shifts are reported on the  $\delta$  scale (ppm) and referenced to the residual solvent peaks:  $\text{CDCl}_3$  (7.26 ppm,  $^1\text{H}$ ; 77.06 ppm,  $^{13}\text{C}$ ) as internal standards. Infrared (IR) spectra were measured with a Mattson Galaxy Series FT-IR 3000 spectrophotometer. High-resolution mass spectrometry (HRMS) data (APPI/APCI/ESI technique) were recorded using an Agilent Technologies 6220 oaTOF instrument. HRMS data (EI technique) were recorded using a Kratos MS50 instrument.

## Experimental Section

### General Procedure for the Synthesis of Intermediates

#### General procedure for the preparation of the 2-arylcyclohexanones A-C (1,3-diketones)

This procedure was based on that of Fos *et al.*<sup>[1]</sup> To an ice-water cooled solution of 1-morpholino-1-cyclohexene (typically 40 mmol, 1 equiv.) and triethylamine (41 mmol, 1.03 equiv.) in chloroform (25 mL), arylacyl chloride (40 mmol, 1 equiv.) in 15 mL of chloroform was added dropwise with temperature below 15 °C (20 min). After that, the mixture was stirred at room temperature for 20 h. Then, 15 mL of 4 N hydrochloric acid were added and the mixture was refluxed for 5 h. The organic layer was separated, the aqueous layer was extracted with DCM ( $2 \times 15$  mL). The extract was combined with the organic layer separated and washed with water ( $2 \times 15$  mL). Following drying over  $\text{MgSO}_4$ , the solvents were removed under reduced pressure. The residue can be used directly, or washed with mixture solvents of hexanes and DCM, or purified further using flash chromatography to afford intermediates A-C.

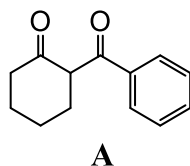

Using the general procedure, 1-morpholino-1-cyclohexene with benzoyl chloride gave **A** as a yellow viscous liquid, yield 80%, which is pure enough to undergo further reaction. To treat the liquid with DCM and hexanes (placed in a fridge), light yellow solid can be obtained, totally in diketone form by  $^1\text{H}$  NMR; mp 81-83 °C (lit.<sup>[1]</sup> mp 76-78 °C);  $^1\text{H}$  NMR (500 MHz,  $\text{CDCl}_3$ )  $\delta$

7.89 (d,  $J = 7.5$  Hz, 2H), 7.56 (t,  $J = 7.5$  Hz, 1H), 7.45 (t,  $J = 7.5$  Hz, 2H), 4.38 (t,  $J = 7.0$  Hz, 1H), 2.61-2.55 (m, 1H), 2.52-2.46 (m, 1H), 2.35-2.28 (m, 1H), 2.14-2.07 (m, 1H), 2.04-1.90 (m, 3H), 1.78-1.72 (m, 1H);  $^{13}\text{C}$  NMR (125 MHz,  $\text{CDCl}_3$ )  $\delta$  208.5, 197.5, 136.6, 133.3, 128.7, 128.5, 58.9, 42.3, 30.0, 27.3, 23.1.

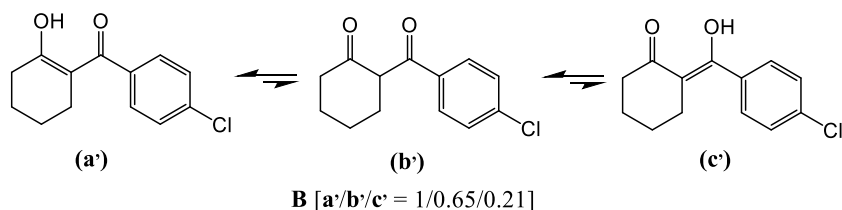

Using the general procedure and flash chromatography (12:1 hexane:EtOAc), 1-morpholino-1-cyclohexene with 4-chlorobenzoyl chloride gave **B** as a red viscous liquid, yield 85%, 1:0.65:0.21 enol/keto mixture of **a'**, **b'** and **c'** by  $^1\text{H}$  NMR; IR (cast film) 3414, 3093, 2945, 2848, 1712, 1683, 1589, 1574, 1488, 1450, 1275, 1092  $\text{cm}^{-1}$ ; HRMS (EI,  $\text{M}^+$ ) for  $\text{C}_{13}\text{H}_{13}\text{O}_2^{35}\text{Cl}$  calcd. 236.0604, found:  $m/z$  236.0602.

**B(a')**:  $^1\text{H}$  NMR (500 MHz,  $\text{CDCl}_3$ )  $\delta$  7.48 (d,  $J = 9.0$  Hz, 2H), 7.39 (d,  $J = 9.0$  Hz, 2H), 2.48 (t,  $J = 6.5$  Hz, 2H), 2.38 (t,  $J = 6.5$  Hz, 2H), 1.78-1.74 (m, 2H), 1.64-1.60 (m, 2H);  $^{13}\text{C}$  NMR (125 MHz,  $\text{CDCl}_3$ )  $\delta$  190.0, 189.9, 136.6, 135.8, 129.2, 128.4, 107.1, 32.7, 26.5, 23.4, 21.8.

**B(b')**:  $^1\text{H}$  NMR (500 MHz,  $\text{CDCl}_3$ )  $\delta$  7.82 (d,  $J = 8.5$  Hz, 2H), 7.42 (d,  $J = 8.5$  Hz, 2H), 4.31 (dd,  $J = 3.0, 1.0$  Hz, 1H), 2.58-2.49 (m, 2H), 2.35-2.26 (m, 1H), 2.15-2.05 (m, 1H), 2.04-1.96 (m, 1H), 1.95-1.84 (m, 1H), 1.80-1.70 (m, 2H);  $^{13}\text{C}$  NMR (125 MHz,  $\text{CDCl}_3$ )  $\delta$  208.3, 196.3, 139.8, 135.0, 129.9, 129.0, 58.9, 42.3, 29.9, 27.3, 23.1.

**B(c')**:  $^1\text{H}$  NMR (500 MHz,  $\text{CDCl}_3$ )  $\delta$  7.97 (d,  $J = 8.5$  Hz, 2H), 7.38 (d,  $J = 8.5$  Hz, 2H), 2.49-2.46 (m, 3H), 2.05-1.96 (m, 3H), 1.94-1.85 (m, 1H), 1.62-1.60 (m, 1H);  $^{13}\text{C}$  NMR (125 MHz,  $\text{CDCl}_3$ )  $\delta$  189.8, 165.8, 139.2, 135.7, 130.9, 128.7, 27.5, 26.3, 23.5, 22.4.

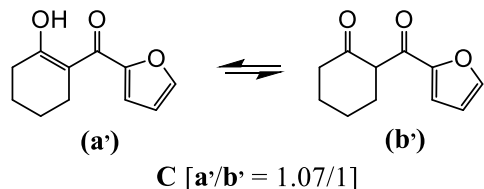

Using the general procedure, 1-morpholino-1-cyclohexene with 2-furoyl chloride gave **C** as light yellow solid, yield 78%, 1.07:1 enol/keto mixture of **a'** and **b'** by  $^1\text{H}$  NMR; mp 104-107  $^\circ\text{C}$ ; IR (cast film) 3394, 3131, 3117, 2938, 2861, 1700, 1661, 1566, 1468, 1445, 1271, 1254, 1029  $\text{cm}^{-1}$ ; HRMS (EI,  $\text{M}^+$ ) for  $\text{C}_{11}\text{H}_{12}\text{O}_3$  calcd. 192.0786, found:  $m/z$  192.0788.

**C(a')**:  $^1\text{H}$  NMR (500 MHz,  $\text{CDCl}_3$ )  $\delta$  7.63 (dd,  $J = 1.5, 0.5$  Hz, 1H), 7.16 (dd,  $J = 3.5, 1.0$  Hz, 1H), 6.55 (dd,  $J = 4.0, 2.0$  Hz, 1H), 2.69 (t,  $J = 5.5$  Hz, 2H), 2.46 (t,  $J = 3.5$  Hz, 2H), 1.77-1.72 (m, 4H);  $^{13}\text{C}$  NMR (125 MHz,  $\text{CDCl}_3$ )  $\delta$  186.1, 177.0, 150.9, 145.9, 118.2, 112.0, 105.9, 33.0, 24.7, 23.3, 21.4.

**C(b')**:  $^1\text{H}$  NMR (500 MHz,  $\text{CDCl}_3$ )  $\delta$  7.55 (dd,  $J = 1.5, 0.5$  Hz, 1H), 7.22 (dd,  $J = 3.5, 0.5$  Hz,

1H), 6.53 (dd,  $J = 4.0, 2.0$  Hz, 1H), 4.17 (ddd,  $J = 9.5, 6.0, 1.0$  Hz, 1H), 2.57-2.53 (m, 1H), 2.50-2.46 (m, 1H), 2.29-2.23 (m, 1H), 2.13-2.08 (m, 1H), 2.02-1.97 (m, 2H), 1.90-1.86 (m, 1H), 1.74-1.70 (m, 1H);  $^{13}\text{C}$  NMR (125 MHz,  $\text{CDCl}_3$ )  $\delta$  207.7, 189.5, 152.5, 146.6, 117.7, 112.5, 59.1, 42.3, 29.3, 27.2, 23.1.

### General procedure for the preparation of the arylacylhexenyl triflate intermediates **5a-5c**

A solution of diketone **A** (or **B**, **C**) (typically 10 mmol, 1.0 equiv.) in THF (10 mL) was added dropwise to a stirred suspension of NaH (60% in mineral oil, 12 mmol, 1.2 equiv.) in THF (45 mL) at  $-10$  °C- $0$  °C. After 45 min, a solution of  $\text{PhNTf}_2$  (13 mmol, 1.3 equiv.) in THF (15 mL) was added and the resulting mixture was reacted at  $-10$  °C- $0$  °C for 15 h. The reaction was diluted with  $\text{H}_2\text{O}$  (50 mL) and extracted with  $\text{Et}_2\text{O}$  ( $3 \times 30$  mL). The combined organic layers were dried over  $\text{MgSO}_4$  and concentrated under reduced pressure. The residue was purified by column chromatography to yield the triflate intermediate **5(a-c)**.

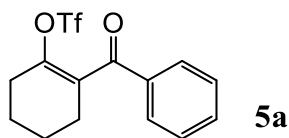

Using the general procedure and flash chromatography (18:1 hexane: $\text{Et}_2\text{O}$ ) provided **5a** as a colorless oil, yield 73%;  $R_f$  0.37 (hexanes/ $\text{Et}_2\text{O}$  5:1); IR (cast film) 3064, 2947, 2867, 1669, 1598, 1582, 1450, 1418, 1247, 1212, 1139, 1031  $\text{cm}^{-1}$ ;  $^1\text{H}$  NMR (500 MHz,  $\text{CDCl}_3$ )  $\delta$  7.89-7.86 (m, 2H), 7.62-7.58 (m, 1H), 7.51-7.47 (m, 2H), 2.56-2.52 (m, 2H), 2.50-2.46 (m, 2H), 1.95-1.90 (m, 2H), 1.81-1.75 (m, 2H);  $^{13}\text{C}$  NMR (125 MHz,  $\text{CDCl}_3$ )  $\delta$  194.5, 146.1, 135.5, 134.0, 130.2, 129.4, 128.8, 118.0 (q,  $J = 318.4$  Hz,  $\text{CF}_3$ ), 27.6, 27.5, 22.7, 21.1; HRMS (ESI) for  $\text{C}_{14}\text{H}_{13}\text{F}_3\text{O}_4\text{S}$  calcd. 357.0379 ( $[\text{M}+\text{Na}]^+$ ) and 335.0559 ( $[\text{M}+\text{H}]^+$ ), found:  $m/z$  357.0372 ( $[\text{M}+\text{Na}]^+$ ) and 335.0560 ( $[\text{M}+\text{H}]^+$ ).

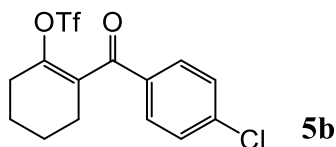

Using the general procedure and flash chromatography (20:1 hexane: $\text{Et}_2\text{O}$ ) provided **5b** as white solid, yield 72%;  $R_f$  0.46 (hexanes/ $\text{Et}_2\text{OAc}$  6:1); mp  $61-63$  °C; IR (cast film) 3093, 2959, 2869, 1660, 1584, 1484, 1450, 1413, 1248, 1201, 1011  $\text{cm}^{-1}$ ;  $^1\text{H}$  NMR (500 MHz,  $\text{CDCl}_3$ )  $\delta$  7.81 (d,  $J = 8.5$  Hz, 2H), 7.46 (d,  $J = 8.5$  Hz, 2H), 2.55-2.51 (m, 2H), 2.49-2.45 (m, 2H), 1.95-1.90 (m, 2H), 1.81-1.74 (m, 2H);  $^{13}\text{C}$  NMR (125 MHz,  $\text{CDCl}_3$ )  $\delta$  193.3, 146.5, 140.6, 133.8, 130.7, 129.8, 129.2, 118.0 (q,  $J = 318.1$  Hz,  $\text{CF}_3$ ), 27.6, 27.4, 22.6, 21.1; HRMS (EI,  $\text{M}^+$ ) for  $\text{C}_{14}\text{H}_{12}\text{O}_4\text{S}^{35}\text{ClF}_3$  calcd. 368.0097, found:  $m/z$  368.0095.

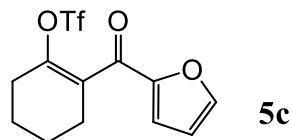

Using the general procedure and flash chromatography (6:1 to 3:1 hexane:Et<sub>2</sub>O) provided **5c** as white solid, yield 56%; *R<sub>f</sub>* 0.28 (hexanes/Et<sub>2</sub>O 5:1); mp 98-99 °C; IR (cast film) 3270, 3125, 3095, 2938, 2871, 1698, 1641, 1561, 1466, 1413, 1207, 1134, 1031 cm<sup>-1</sup>; <sup>1</sup>H NMR (500 MHz, CDCl<sub>3</sub>) δ 7.65 (d, *J* = 2.0 Hz, 1H), 7.25 (dd, *J* = 5.0, 0.5 Hz, 1H), 6.58 (dd, *J* = 3.5, 1.5 Hz, 1H), 2.54-2.48 (m, 4H), 1.92-1.86 (m, 2H), 1.78-1.73 (m, 2H); <sup>13</sup>C NMR (125 MHz, CDCl<sub>3</sub>) δ 181.4, 151.5, 147.7, 147.0, 129.2, 120.2, 118.1 (q, *J* = 318.1 Hz, CF<sub>3</sub>), 112.7, 27.7, 26.9, 22.6, 21.1; HRMS (ESI) for C<sub>12</sub>H<sub>11</sub>F<sub>3</sub>O<sub>5</sub>S calcd. 347.0171 ([M+Na]<sup>+</sup>) and 325.0352 ([M+H]<sup>+</sup>), found: *m/z* 347.0168 ([M+Na]<sup>+</sup>) and 325.0353 ([M+H]<sup>+</sup>).

### Procedure for the preparation of the 2-cyanohexanone **D**

This procedure was based on that of Vallribera and Shafir *et al.*<sup>[2]</sup> NaH (60% in mineral oil, 6.96 g, 174 mmol, 3.0 equiv.) and a stir bar were placed in an oven-dried 3-neck 250 mL flask under nitrogen. Dry hexane (80 mL) was added and the mixture was stirred for 15 min, then decanted the liquid via cannula to remove the protecting oil in NaH. Dry THF (80 mL) and *N*-methylaniline (18.62 g, 174 mmol, 3.0 equiv.) were added. The flask was then fitted with a reflux condenser and a solution of pimelonitrile (7.08 g, 58 mmol, 1.0 equiv.) in THF (40 mL) was added to the flask through an addition funnel (10 min). After that, the reaction mixture was brought to reflux for 2.5 h, leading to the formation of a thick paste. This mixture was cooled to 0 °C and was quenched with H<sub>2</sub>O (30 mL). The mixture was further acidified to a pH of 1 using 4 N HCl for the complete hydrolysis of the intermediate imine. The resulting yellow solution was extracted with Et<sub>2</sub>O (3 × 25 mL) and the organic layer combined was dried over MgSO<sub>4</sub>. The solvents were removed under reduced pressure and the residue was purified by column chromatography.

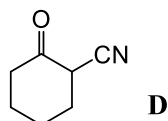

Flash chromatography (3:1 hexane:EtOAc) gave **D** (5.94 g, yield 83 %) as yellow oil (lit.<sup>[2]</sup> yield 73% (using distillation)).

**D**: *R<sub>f</sub>* 0.35 (hexanes/EtOAc 2:1); <sup>1</sup>H NMR (500 MHz, CDCl<sub>3</sub>) δ 3.50 (dd, *J* = 11.0, 5.5 Hz, 1H), 2.62-2.58 (m, 1H), 2.43-2.32 (m, 2H), 2.08-1.96 (m, 3H), 1.84-1.66 (m, 2H); <sup>13</sup>C NMR (125 MHz, CDCl<sub>3</sub>) δ 200.5, 116.7, 43.4, 40.7, 32.1, 26.8, 23.7; HRMS (EI, M<sup>+</sup>) for C<sub>7</sub>H<sub>9</sub>NO calcd. 123.0684, found: *m/z* 123.0681.

### Procedure for the preparation of the cyanohexenyl triflate intermediate **5d**

This procedure was based on that of Lin and Boyd *et al.*<sup>[3]</sup> To a stirred, ice-cold solution of 2-cyanocyclohexanone (**D**, 1.80 g, 14.6 mmol, 1.0 equiv.) and diisopropylethylamine (3.06 mL,

17.6 mmol, 1.21 equiv.) in 18 mL of dry 1,2-dichloroethane, triflic anhydride (2.95 mL, 17.5 mmol, 1.2 equiv.) was added. The mixture was stirred at 0 °C for 2 h. Ethyl acetate (20 mL) was added to the mixture, and the resulting suspension was filtered through a short plug of silica gel and rinsed with excess EtOAc. The filtrate was concentrated under reduced pressure to give an oily residue which was made further purification by column chromatography.

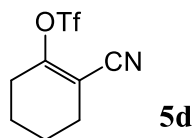

Flash chromatography (5:1 hexane:EtOAc) gave **5d** (2.87 g, yield 77 %) as yellow oil (lit.<sup>[3]</sup> yield 75%).

**5d**: R<sub>f</sub> 0.71 (hexanes/EtOAc 2:1); IR (cast film) 2953, 2873, 2227, 1668, 1426, 1218, 1139, 1054 cm<sup>-1</sup>; <sup>1</sup>H NMR (500 MHz, CDCl<sub>3</sub>) δ 2.54-2.50 (m, 2H), 2.45-2.41 (m, 2H), 1.86-1.81 (m, 2H), 1.73-1.69 (m, 2H); <sup>13</sup>C NMR (125 MHz, CDCl<sub>3</sub>) δ 158.6, 118.3 (q, *J* = 318.6 Hz, CF<sub>3</sub>), 114.0, 105.1, 28.5, 26.8, 21.7, 20.4; HRMS (EI, M<sup>+</sup>) for C<sub>8</sub>H<sub>8</sub>NO<sub>3</sub>F<sub>3</sub>S calcd. 255.0177, found: *m/z* 255.0181.

### General Synthetic Procedure for the Dimerization and Furan Trapping Products

#### General synthetic procedure for the dimerization products **6a-6c** of 1-arylacyl-1,2-cyclohexadienes *via* the hetero-Diels-Alder reaction

To a stirred solution of intermediate **5** (0.4 mmol, 1.0 equiv.) in anhydrous THF (1.0 mL) was added dropwise a solution of KO<sup>t</sup>Bu (0.48 mmol, 1.2 equiv.) in anhydrous THF (1.5 mL) at room temperature in 20 min. After being stirred over night, the reaction mixture was quenched with H<sub>2</sub>O (10 mL) and extracted with Et<sub>2</sub>O (3 × 15 mL). The combined organic layers were dried over MgSO<sub>4</sub> and concentrated under reduced pressure. The residue was further purified by column chromatography to afford the new dimerization product **6**.

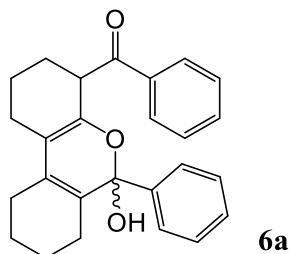

134 mg of starting material **5a** was used. Flash chromatography (7:1 hexane:EtOAc) gave **6a** (20 mg, 26 %) as yellow sticky oil (starting material **5a** recovered 7 mg, 5%); R<sub>f</sub> 0.42 (hexanes/EtOAc 4:1); IR (cast film) 3398, 3062, 2940, 2868, 1672, 1597, 1580, 1449, 1267 cm<sup>-1</sup>; <sup>1</sup>H NMR (500 MHz, CDCl<sub>3</sub>) δ 7.91-7.89 (m, 2H), 7.59-7.54 (m, 1H), 7.50-7.45 (m, 4H), 7.40-7.33 (m, 3H), 3.03 (br s, 1H), 2.60-2.51 (m, 2H), 2.47 (dd, *J* = 12.0, 4.0 Hz, 1H), 2.46-2.32

(m, 2H), 2.60-2.00 (m, 1H), 1.86-1.80 (m, 1H), 1.81-1.71 (m, 2H), 1.64-1.56 (m, 2H), 1.58-1.55 (m, 1H), 1.55-1.50 (m, 1H), 1.49-1.42 (m, 1H), 1.44-1.38 (m, 1H);  $^{13}\text{C}$  NMR (125 MHz,  $\text{CDCl}_3$ )  $\delta$  199.7, 145.9, 137.3, 135.7, 134.1, 133.4, 133.0, 129.3, 129.1, 128.6, 128.4, 127.9, 106.0, 97.3, 42.7, 37.0, 31.2, 28.8, 26.3, 24.5, 23.1(2), 23.1(1); HRMS (ESI,  $[\text{M}+\text{Na}]^+$ ) for  $\text{C}_{26}\text{H}_{26}\text{O}_3$  calcd. 409.1774, found:  $m/z$  409.1770.

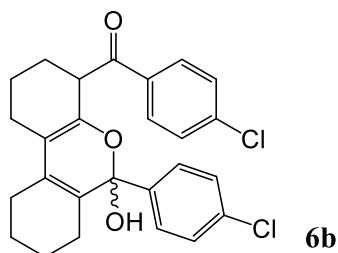

73.7 mg of starting material **5b** was used. Flash chromatography (18:1 to 12:1 hexane:EtOAc) gave **6b** (5 mg, 11 %) as yellow sticky oil (starting material **5b** recovered 20 mg, 27%), there were little impurities in the product (very difficult to be removed);  $R_f$  0.34 (hexanes/EtOAc 6:1); IR (cast film) 3405, 2937, 2869, 1666, 1587, 1488, 1446, 1263, 1091  $\text{cm}^{-1}$ ;  $^1\text{H}$  NMR (500 MHz,  $\text{CDCl}_3$ )  $\delta$  7.86 (d,  $J = 8.5$  Hz, 2H), 7.44 (d,  $J = 8.5$  Hz, 2H), 7.42 (d,  $J = 8.5$  Hz, 2H), 7.35 (d,  $J = 8.5$  Hz, 2H), 2.90 (br s, 1H), 2.55-2.48 (m, 2H), 2.42 (dd,  $J = 12.0, 4.0$  Hz, 1H), 2.36-2.27 (m, 2H), 2.24-1.98 (m, 1H), 1.88-1.73 (m, 2H), 1.76-1.71 (m, 1H), 1.64-1.57 (m, 2H), 1.58-1.52 (m, 2H), 1.50-1.45 (m, 1H), 1.44-1.37 (m, 1H);  $^{13}\text{C}$  NMR (125 MHz,  $\text{CDCl}_3$ )  $\delta$  198.4, 144.9, 139.5, 135.4, 134.3, 134.2, 134.0, 133.0, 130.7, 130.4, 128.8, 128.1, 106.3, 97.3, 42.6, 37.2, 31.2, 28.6, 26.2, 24.4, 23.1, 23.0; HRMS (EI,  $\text{M}^+$ ) for  $\text{C}_{26}\text{H}_{24}\text{O}_3^{35}\text{Cl}_2$  calcd. 454.1103, found:  $m/z$  454.1102.

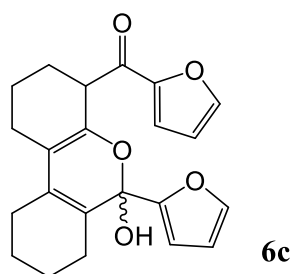

130 mg of starting material **5c** was used. Flash chromatography (3:2 hexane:Et<sub>2</sub>O) gave **6c** (31 mg, 42 %) as yellow sticky oil (starting material **5c** recovered 12 mg, 10%);  $R_f$  0.28 (hexanes/Et<sub>2</sub>O 1:1); IR (cast film) 3408, 2930, 2855, 1647, 1562, 1462, 1164, 1083, 1020  $\text{cm}^{-1}$ ;  $^1\text{H}$  NMR (500 MHz,  $\text{CDCl}_3$ )  $\delta$  7.61 (dd,  $J = 2.0, 1.0$  Hz, 1H), 7.48 (dd,  $J = 2.0, 1.0$  Hz, 1H), 7.22 (dd,  $J = 3.5, 1.0$  Hz, 1H), 6.64 (d,  $J = 3.5$  Hz, 1H), 6.54 (dd,  $J = 3.5, 1.5$  Hz, 1H), 6.46 (dd,  $J = 3.5, 2.0$  Hz, 1H), 2.95 (br s, 1H), 2.81 (t,  $J = 6.5$  Hz, 2H), 2.61 (dd,  $J = 12.0, 4.0$  Hz, 1H), 2.52-2.49 (m, 2H), 2.11-2.05 (m, 1H), 1.94-1.78 (m, 2H), 1.80-1.74 (m, 1H), 1.66-1.58 (m, 2H), 1.60-1.52 (m, 2H), 1.51-1.44 (m, 1H), 1.39-1.30 (m, 1H);  $^{13}\text{C}$  NMR (125 MHz,  $\text{CDCl}_3$ )  $\delta$  185.9, 152.8, 150.2, 146.7, 142.7, 137.3, 135.6, 133.3, 119.2, 112.3, 111.2, 111.1, 106.9, 97.1, 42.5, 37.1, 31.4, 28.3, 24.7, 24.4, 23.1, 22.7; HRMS (ESI,  $[\text{M}+\text{Na}]^+$ ) for  $\text{C}_{22}\text{H}_{22}\text{O}_5$  calcd. 389.1359,

found: m/z 389.1358.

HMBC correlations for the dimerization products **6a-6c**:

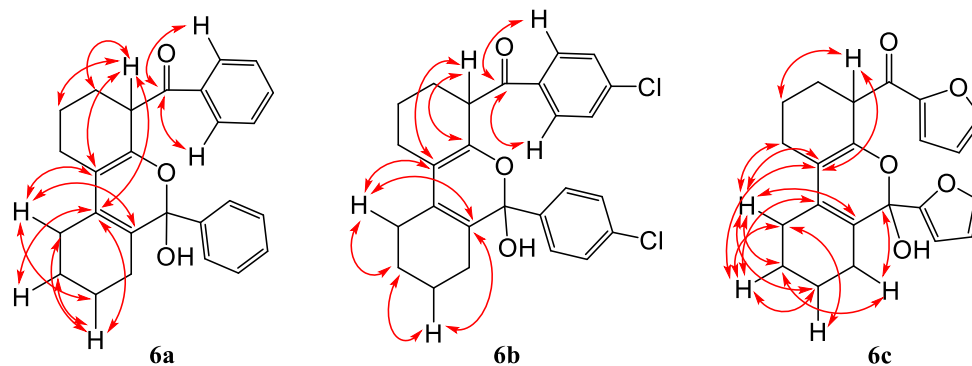

**Table S1** Optimization of the dimerization reaction conditions of 1,2-cyclohexadiene bearing arylacyl group <sup>a</sup>

| Entry | Base (equiv.)             | Solvent | Temp.       | Time   | Yield <b>6a</b> (%) <sup>b</sup> |
|-------|---------------------------|---------|-------------|--------|----------------------------------|
| 1     | Et <sub>3</sub> N (1.5)   | THF     | rt          | 12 h   | 0 <sup>c</sup>                   |
| 2     | DBU (1.05)                | THF     | rt          | 12 h   | 0                                |
| 3     | NaOH (1.05)               | THF     | rt          | 12 h   | Trace <sup>d</sup>               |
| 4     | KOH (1.05)                | DMSO    | rt          | 12 h   | Trace                            |
| 5     | NaH (1.6)                 | THF     | rt          | 12 h   | 0                                |
| 6     | KO <sup>t</sup> Bu (1.75) | THF     | rt          | 12 h   | 5%                               |
| 7     | KO <sup>t</sup> Bu (1.2)  | THF     | -78 to 0 °C | 12 h   | - <sup>e</sup>                   |
| 8     | KO <sup>t</sup> Bu (1.75) | THF     | 0 °C to rt  | 12 h   | Trace                            |
| 9     | KO <sup>t</sup> Bu (1.75) | DMSO    | 40          | 12 h   | -                                |
| 10    | KO <sup>t</sup> Bu (1.2)  | THF     | 45          | 3 h    | 12% <sup>f</sup>                 |
| 11    | KO <sup>t</sup> Bu (1.75) | Dioxane | 100         | 2 h    | 0                                |
| 12    | KO <sup>t</sup> Bu (1.75) | DMF     | 120         | 2 h    | -                                |
| 13    | KO <sup>t</sup> Bu (1.75) | DMSO    | 120         | 2 h    | -                                |
| 14    | KO <sup>t</sup> Bu (1.02) | THF     | rt          | 1.5 h  | 6% <sup>f</sup>                  |
| 15    | KO <sup>t</sup> Bu (2.1)  | THF     | rt          | 40 min | 8% <sup>f</sup>                  |
| 16    | KO <sup>t</sup> Bu (2.1)  | THF     | 45-50       | 30 min | Trace                            |
| 17    | KO <sup>t</sup> Bu (4.0)  | THF     | rt          | 2 h    | -                                |
| 18    | KO <sup>t</sup> Bu (1.2)  | THF     | rt          | 3 h    | 20% <sup>f</sup>                 |
| 19    | KO <sup>t</sup> Bu (1.2)  | THF     | rt          | 12 h   | 26% <sup>f</sup>                 |

<sup>a</sup> Reaction conditions: in general, **5a** (0.4 mmol) and base (0.42 ~ 1.6 mmol) in anhydrous solvent (~ 2.5 mL)



---

at different temperature under nitrogen for different time as mentioned in the table. <sup>b</sup> Isolated yield. <sup>c</sup> Almost no reaction underwent. <sup>d</sup> With little hydrolysis product A. <sup>e</sup> Messy mixture. <sup>f</sup> **5a** recovered 5%-8%, with little hydrolysis product A.

---

### General procedure for the regioselective synthesis of the furan (or 2,5-dimethylfuran) trapping-[4+2] cycloadducts **10a-10d** and **11d**

To a stirred solution of intermediate **5** (0.2 mmol, 1.0 equiv.) and furan (2.0 mL, 137 equiv.) in anhydrous THF (0.5 mL) was added dropwise a solution of KO<sup>t</sup>Bu (0.4 mmol, 2.0 equiv.) in anhydrous THF (1.5 mL) at room temperature in 20 min. After being further stirred for 2 h, the reaction mixture was quenched with H<sub>2</sub>O (10 mL) and extracted with Et<sub>2</sub>O (3 × 15 mL). The combined organic layers were dried over MgSO<sub>4</sub> and concentrated under reduced pressure. The residue was further purified by column chromatography to afford the cycloadduct **10**.

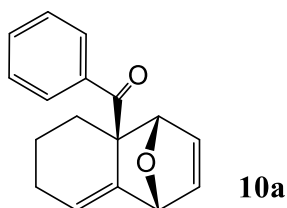

67 mg of starting material **5a** was used. Flash chromatography (12:1 hexane:EtOAc) gave **10a** (25 mg, 50 %) as white solid (**5a** recovered 3 mg, 5%); R<sub>f</sub> 0.30 (hexanes/EtOAc 6:1); mp 85-87 °C; IR (cast film) 3067, 3005, 2932, 2866, 1674, 1596, 1578, 1446, 1225, 1172, 1010 cm<sup>-1</sup>; <sup>1</sup>H NMR (500 MHz, CDCl<sub>3</sub>) δ 7.87-7.84 (m, 2H), 7.49-7.46 (m, 1H), 7.42-7.38 (m, 2H), 6.52 (dd, *J* = 5.5, 2.0 Hz, 1H), 6.25 (dd, *J* = 5.5, 1.5 Hz, 1H), 5.79 (t, *J* = 3.5 Hz, 1H), 5.43 (t, *J* = 1.0 Hz, 1H), 5.22 (br s, 1H), 2.61 (dt, *J* = 12.0, 3.5 Hz, 1H), 2.13-2.07 (m, 1H), 2.00-1.89 (m, 1H), 1.71-1.64 (m, 1H), 1.50-1.38 (m, 1H), 0.75 (ddd, *J* = 14.5, 12.0, 4.0 Hz, 1H); <sup>13</sup>C NMR (125 MHz, CDCl<sub>3</sub>) δ 204.0, 139.4, 138.7, 138.1, 131.7, 129.7, 128.9, 128.0, 121.5, 85.9, 80.0, 59.0, 32.9, 24.1, 19.8; HRMS (EI, M<sup>+</sup>) for C<sub>17</sub>H<sub>16</sub>O<sub>2</sub> calcd. 252.1150, found: m/z 252.1151.

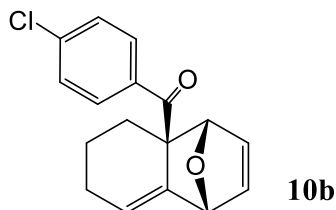

73.7 mg of starting material **5b** was used. Flash chromatography (15:1 to 12:1 hexane:EtOAc) gave **10b** (47 mg, 82 %) as light yellow solid (**5b** recovered 1.4 mg, 2%); R<sub>f</sub> 0.32 (hexanes/EtOAc 7:1); mp 87-89 °C; IR (cast film) 3090, 3015, 2936, 2867, 1674, 1587, 1486, 1445, 1225, 1094 cm<sup>-1</sup>; <sup>1</sup>H NMR (500 MHz, CDCl<sub>3</sub>) δ 7.78 (d, *J* = 9.0 Hz, 2H), 7.36 (d, *J* = 9.0 Hz, 2H), 6.52 (dd, *J* = 5.5, 2.0 Hz, 1H), 6.24 (dd, *J* = 5.5, 2.0 Hz, 1H), 5.79 (t, *J* = 3.5 Hz, 1H), 5.35 (br s, 1H), 5.23 (br s, 1H), 2.57 (dt, *J* = 12.0, 3.5 Hz, 1H), 2.11-2.04 (m, 1H), 1.99-1.91 (m,

1H), 1.71-1.65 (m, 1H), 1.43-1.35 (m, 1H), 0.70 (ddd,  $J = 13.3, 12.5, 4.0$  Hz, 1H);  $^{13}\text{C}$  NMR (125 MHz,  $\text{CDCl}_3$ )  $\delta$  203.6, 139.3, 138.6, 138.0, 136.8, 130.4, 129.8, 128.3, 121.9, 86.1, 80.0, 59.0, 33.0, 24.2, 19.8; HRMS (EI,  $\text{M}^+$ ) for  $\text{C}_{17}\text{H}_{15}\text{O}_2^{35}\text{Cl}$  calcd. 286.0761, found:  $m/z$  286.0755.

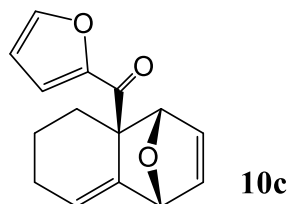

65 mg of starting material **5c** was used. Flash chromatography (8:1 to 5:1 hexane:EtOAc) gave **10c** (29 mg, 60 %) as white solid (**5c** recovered 1 mg, 2%);  $R_f$  0.29 (hexanes/EtOAc 4:1); mp 105-107 °C; IR (cast film) 3131, 3008, 2934, 2867, 2835, 1666, 1645, 1562, 1464, 1285, 1010  $\text{cm}^{-1}$ ;  $^1\text{H}$  NMR (500 MHz,  $\text{CDCl}_3$ )  $\delta$  7.57 (dd,  $J = 2.0, 1.0$  Hz, 1H), 7.32 (dd,  $J = 3.5, 0.5$  Hz, 1H), 6.52 (dd,  $J = 5.5, 2.0$  Hz, 1H), 6.50 (dd,  $J = 3.5, 2.0$  Hz, 1H), 6.22 (dd,  $J = 5.5, 2.0$  Hz, 1H), 5.86 (t,  $J = 3.5$  Hz, 1H), 5.44 (t,  $J = 1.0$  Hz, 1H), 5.21 (br s, 1H), 2.61 (dt,  $J = 12.5, 3.5$  Hz, 1H), 2.21-2.15 (m, 1H), 2.00-1.92 (m, 1H), 1.70-1.64 (m, 1H), 1.43-1.33 (m, 1H), 0.69 (ddd,  $J = 13.5, 12.5, 4.0$  Hz, 1H);  $^{13}\text{C}$  NMR (125 MHz,  $\text{CDCl}_3$ )  $\delta$  190.2, 152.6, 145.7, 138.8, 138.7, 129.6, 121.9, 119.6, 112.1, 85.1, 80.0, 58.2, 31.1, 24.3, 19.7; HRMS (EI,  $\text{M}^+$ ) for  $\text{C}_{15}\text{H}_{14}\text{O}_3$  calcd. 242.0943, found:  $m/z$  242.0939.

Pertinent ROESY correlations for stereochemistry of above fuan trapping products containing arylacyl group:

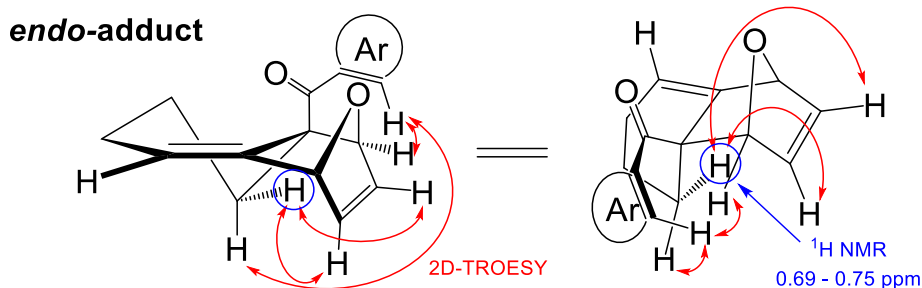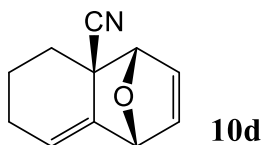

153 mg (0.6 mmol, 1.0 equiv.) of starting material **5d**, 4.0 mL (92 equiv.) of furan and  $\text{KO}^t\text{Bu}$  (1.2 mmol, 2.0 equiv.) were used to carry out the reaction for 45 min at room temperature. Flash chromatography (9:1 to 6:1 hexane:EtOAc) gave **10d** (47 mg, 45 %) as colorless oil;  $R_f$  0.25 (hexanes/EtOAc 4:1); IR (cast film) 3084, 3011, 2928, 2855, 2231, 1563, 1459, 1305, 1021  $\text{cm}^{-1}$ ;  $^1\text{H}$  NMR (500 MHz,  $\text{CDCl}_3$ )  $\delta$  6.47 (dd,  $J = 5.5, 2.0$  Hz, 1H), 6.07 (dd,  $J = 5.5, 1.5$  Hz, 1H), 5.79

(t,  $J = 3.5$  Hz, 1H), 5.27 (br s, 1H), 5.23 (br s, 1H), 2.38-2.28 (m, 1H), 2.22 (dt,  $J = 12.0, 3.5$  Hz, 1H), 2.06-1.96 (m, 2H), 1.90-1.84 (m, 1H), 0.62 (ddd,  $J = 12.5, 12.0, 4.0$  Hz, 1H);  $^{13}\text{C}$  NMR (125 MHz,  $\text{CDCl}_3$ )  $\delta$  138.7, 136.0, 127.9, 122.4, 122.3, 84.5, 79.7, 42.5, 30.4, 24.0, 19.6; HRMS (EI,  $\text{M}^+$ ) for  $\text{C}_{11}\text{H}_{11}\text{NO}$  calcd. 173.0841, found:  $m/z$  173.0839.

Pertinent ROESY correlations for stereochemistry:

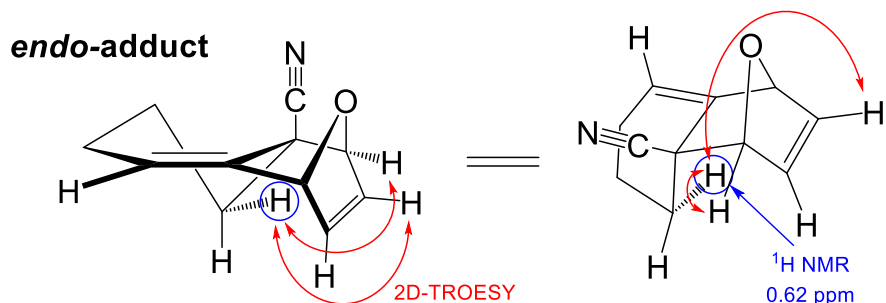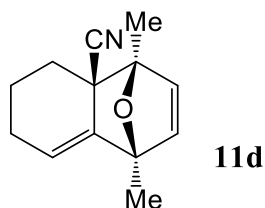

102 mg (0.4 mmol, 1.0 equiv.) of starting material **5d**, 2.8 mL (65 equiv.) of 2,5-dimethylfuran and  $\text{KO}^t\text{Bu}$  (0.8 mmol, 2.0 equiv.) were used to carry out the reaction for 45 min at room temperature. Flash chromatography (9:1 hexane:EtOAc) gave **11d** (16 mg, yield 20 %) as yellow oil (**5d** recovered 10 mg, 10%);  $R_f$  0.67 (hexanes/EtOAc 2:1); IR (cast film) 3079, 2977, 2933, 2872, 2229, 1573, 1446, 1383, 1316, 1138  $\text{cm}^{-1}$ ;  $^1\text{H}$  NMR (500 MHz,  $\text{CDCl}_3$ )  $\delta$  6.20 (d,  $J = 5.5$  Hz, 1H), 5.83 (d,  $J = 5.0$  Hz, 1H), 5.67 (dd,  $J = 4.0, 3.0$  Hz, 1H), 2.35-2.30 (m, 1H), 2.12 (dt,  $J = 12.0, 3.5$  Hz, 1H), 2.04-1.96 (m, 2H), 1.90-1.85 (m, 1H), 1.81 (s, 3H), 1.65 (s, 3H), 0.62 (ddd,  $J = 12.8, 12.0, 4.5$  Hz, 1H);  $^{13}\text{C}$  NMR (125 MHz,  $\text{CDCl}_3$ )  $\delta$  142.5, 142.2, 131.8, 121.4, 120.2, 89.3, 87.1, 48.3, 30.0, 23.5, 19.5, 15.6, 14.8; HRMS (EI,  $\text{M}^+$ ) for  $\text{C}_{13}\text{H}_{15}\text{NO}$  calcd. 201.1154, found:  $m/z$  201.1154.

Pertinent ROESY correlations for stereochemistry:

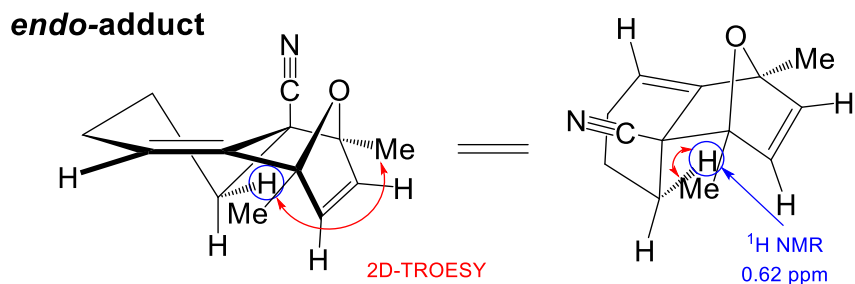

**General procedure for the regioselective synthesis of the DPIBF trapping-[4+2]**

### cycloadducts **12a-12d** and **13d**

To a stirred solution of intermediate **5** (0.2 mmol, 1.0 equiv.) and 1,3-diphenylisobenzofuran (DPIBF) (0.4 mmol, 2.0 equiv.) in anhydrous THF (2.0 mL) was added dropwise a solution of KO<sup>t</sup>Bu (0.4 mmol, 2.0 equiv.) in anhydrous THF (1.5 mL) at room temperature in 20 min. After being stirred for 2 h, the reaction mixture was quenched with H<sub>2</sub>O (10 mL) and extracted with Et<sub>2</sub>O (3 × 15 mL). The combined organic layers were dried over MgSO<sub>4</sub> and concentrated under reduced pressure. The residue was further purified by column chromatography to afford the cycloadduct **12**.

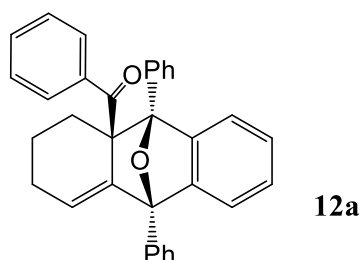

67 mg of starting material **5a** was used. Flash chromatography (30:1 hexane:EtOAc) gave **12a** (18 mg, 20 %) as white solid (**5a** recovered 22 mg, 33%; **6a** can also be isolated, 5%); R<sub>f</sub> 0.41 (hexanes/EtOAc 10:1); mp 124-126 °C; IR (cast film) 3060, 3035, 2932, 2853, 1668, 1598, 1578, 1497, 1458, 1448, 1238 cm<sup>-1</sup>; <sup>1</sup>H NMR (500 MHz, CDCl<sub>3</sub>) δ 7.65-7.60 (m, 4H), 7.47-7.41 (m, 5H), 7.38-7.34 (m, 1H), 7.30-7.26 (m, 4H), 7.23-7.18 (m, 2H), 7.15-7.08 (m, 3H), 6.01 (dd, *J* = 5.0, 2.5 Hz, 1H), 3.04 (ddd, *J* = 11.5, 4.0, 3.0 Hz, 1H), 2.13-2.07 (m, 1H), 2.03-1.95 (m, 1H), 1.69-1.60 (m, 2H), 0.56 (ddd, *J* = 12.3, 12.0, 5.5 Hz, 1H); <sup>13</sup>C NMR (125 MHz, CDCl<sub>3</sub>) δ 204.9, 149.3, 144.7, 144.6, 143.1, 136.3, 134.8, 130.0, 128.4, 128.3, 128.0(8), 128.0(6), 128.0(0), 127.8, 127.6, 127.2, 126.0, 125.7, 124.4, 121.6, 117.5, 93.0, 89.4, 65.3, 32.2, 24.3, 19.6; HRMS (EI, M<sup>+</sup>) for C<sub>33</sub>H<sub>26</sub>O<sub>2</sub> calcd. 454.1933, found: *m/z* 454.1928.

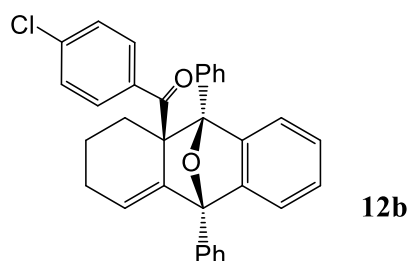

73.7 mg of starting material **5b** was used. Flash chromatography (20:1 hexane:EtOAc) gave **12b** (22 mg, 23 %) as light yellow solid (**5b** recovered 5 mg, 7%); R<sub>f</sub> 0.58 (hexanes/EtOAc 6:1); mp 159-161 °C; IR (cast film) 3062, 3040, 2937, 1668, 1590, 1497, 1485, 1458, 1448, 1244, 1091 cm<sup>-1</sup>; <sup>1</sup>H NMR (500 MHz, CDCl<sub>3</sub>) δ 7.67 (d, *J* = 6.5 Hz, 2H), 7.58 (d, *J* = 7.0 Hz, 2H), 7.53-7.45 (m, 3H), 7.44-7.41 (m, 2H), 7.38-7.35 (m, 1H), 7.29-7.18 (m, 5H), 7.16-7.12 (m, 1H), 7.07-7.04 (m, 2H), 6.06 (dd, *J* = 5.0, 3.0 Hz, 1H), 3.03 (ddd, *J* = 11.5, 4.5, 3.0 Hz, 1H), 2.07-2.00 (m, 2H), 1.68-1.59 (m, 2H), 0.55 (ddd, *J* = 12.8, 12.0, 5.5 Hz, 1H); <sup>13</sup>C NMR (125 MHz, CDCl<sub>3</sub>)

$\delta$  203.5, 149.1, 144.5, 144.4, 141.1 136.4, 136.0, 134.7, 129.9, 128.5, 128.4, 128.1, 127.9, 127.7, 127.6, 127.4, 126.1, 125.6, 124.7, 121.6, 117.5, 92.9, 89.3, 65.3, 32.1, 24.2, 19.6; HRMS (EI,  $M^+$ ) for  $C_{33}H_{25}O_2^{35}Cl$  calcd. 488.1543, found:  $m/z$  488.1542.

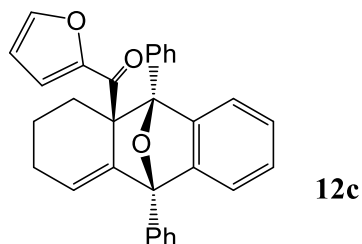

65 mg of starting material **5c** was used. Flash chromatography (18:1 to 3:1 hexane:EtOAc) gave **12c** (26 mg, 29 %) as colorless sticky oil (**5c** recovered 8 mg, 12%; **6c** can also be isolated, 8%);  $R_f$  0.24 (hexanes/EtOAc 10:1); IR (cast film) 3061, 3039, 2938, 2869, 1649, 1601, 1556, 1497, 1458, 1270  $cm^{-1}$ ;  $^1H$  NMR (500 MHz,  $CDCl_3$ )  $\delta$  8.00 (d,  $J = 7.5$  Hz, 2H), 7.58-7.49 (m, 5H), 7.39-7.28 (m, 4H), 7.23-7.14 (m, 4H), 6.97 (d,  $J = 3.5$  Hz, 1H), 6.23 (dd,  $J = 3.5, 2.0$  Hz, 1H), 6.07 (dd,  $J = 5.0, 2.5$  Hz, 1H), 3.08 (ddd,  $J = 12.0, 4.5, 3.0$  Hz, 1H), 2.07-2.02 (m, 1H), 1.99-1.90 (m, 1H), 1.66-1.59 (m, 1H), 1.53-1.46 (m, 1H), 0.55 (ddd,  $J = 13.0, 12.0, 5.0$  Hz, 1H);  $^{13}C$  NMR (125 MHz,  $CDCl_3$ )  $\delta$  189.1, 153.6, 149.7, 145.4, 144.7, 144.4, 136.0, 135.4, 128.5, 128.4, 128.2, 128.0, 127.7, 127.6, 126.0, 125.5, 123.7, 121.6, 119.5, 117.6, 111.4, 92.7, 89.5, 63.8, 31.3, 24.3, 19.5; HRMS (EI,  $M^+$ ) for  $C_{31}H_{24}O_3$  calcd. 444.1726, found:  $m/z$  444.1730.

Pertinent ROESY correlations for stereochemistry of above DPIBF trapping products containing arylacyl group:

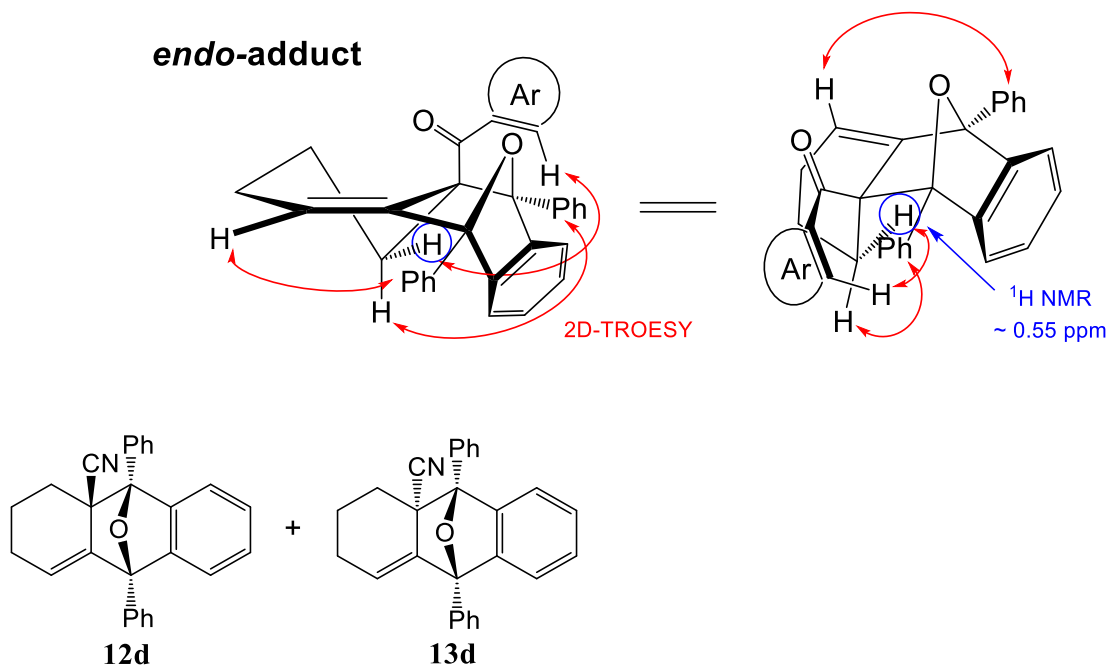

76.5 mg (0.3 mmol, 1.0 equiv.) of starting material **5d**, 0.9 mmol (3.0 equiv.) of DPIBF and

KO<sup>t</sup>Bu (0.6 mmol, 2.0 equiv.) were used to carry out the reaction for 30 min at room temperature. Flash chromatography (45:1 to 18:1 hexane:EtOAc) gave **12d** (40 mg, 36 %) and **13d** (13 mg, 12 %) as white solids.

**12d**: R<sub>f</sub> 0.25 (hexanes/EtOAc 10:1); mp 195-196 °C; IR (cast film) 3061, 3033, 2954, 2869, 2235, 1599, 1498, 1457, 1448, 1306, 1005 cm<sup>-1</sup>; <sup>1</sup>H NMR (500 MHz, CDCl<sub>3</sub>) δ 7.89 (d, *J* = 6.5 Hz, 2H), 7.75 (d, *J* = 7.0 Hz, 2H), 7.56-7.50 (m, 5H), 7.44 (t, *J* = 7.5 Hz, 1H), 7.32-7.17 (m, 4H), 5.86 (dd, *J* = 4.0, 3.0 Hz, 1H), 2.51 (dt, *J* = 12.0, 3.5 Hz, 1H), 2.38-2.32 (m, 1H), 2.06-2.02 (m, 1H), 1.96-1.82 (m, 2H), 0.82 (ddd, *J* = 13.5, 12.0, 4.0 Hz, 1H); <sup>13</sup>C NMR (125 MHz, CDCl<sub>3</sub>) δ 148.3, 142.1, 141.7, 135.4, 133.2, 129.1, 128.8, 128.6, 128.5(8), 128.5(6), 128.5(2), 126.6, 125.8, 125.2, 122.2, 120.6, 118.4, 91.7, 90.1, 51.1, 30.1, 24.0, 19.1; HRMS (EI, M<sup>+</sup>) for C<sub>27</sub>H<sub>21</sub>NO calcd. 375.1623, found: m/z 375.1621.

Pertinent ROESY correlations for stereochemistry:

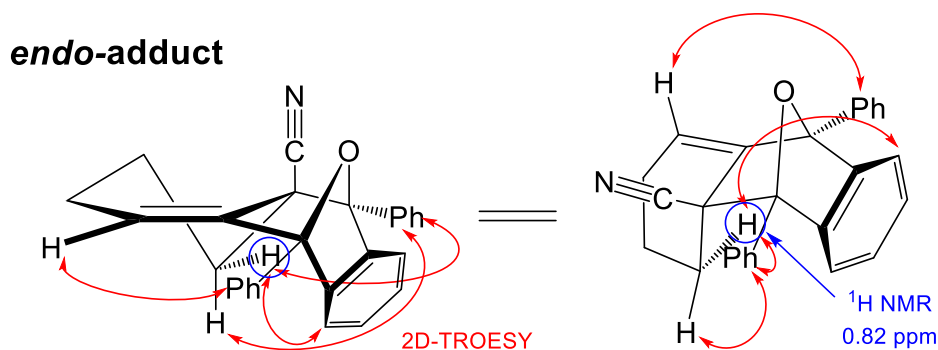

**13d**: R<sub>f</sub> 0.45 (hexanes/EtOAc 10:1); mp 198-199 °C; IR (cast film) 3059, 3032, 2940, 2871, 2230, 1602, 1499, 1459, 1448, 1310, 1010 cm<sup>-1</sup>; <sup>1</sup>H NMR (500 MHz, CDCl<sub>3</sub>) δ 7.85 (d, *J* = 7.0 Hz, 2H), 7.74 (d, *J* = 7.5 Hz, 2H), 7.58-7.54 (m, 4H), 7.48-7.43 (m, 3H), 7.34 (d, *J* = 7.5 Hz, 1H), 7.31-7.24 (m, 2H), 5.85 (dd, *J* = 6.0, 2.5 Hz, 1H), 2.32-2.25 (m, 1H), 2.12-2.04 (m, 1H), 1.99-1.91 (m, 2H), 1.77-1.70 (m, 1H), 1.17 (dt, *J* = 6.0, 12.5 Hz, 1H); <sup>13</sup>C NMR (125 MHz, CDCl<sub>3</sub>) δ 145.9, 143.9, 140.7, 134.8, 134.7, 128.8, 128.7, 128.3, 128.1, 128.0, 127.6, 125.6, 125.5, 122.2, 121.2, 121.0, 120.2, 90.5, 90.2, 47.8, 29.8, 22.0, 17.8; HRMS (EI, M<sup>+</sup>) for C<sub>27</sub>H<sub>21</sub>NO calcd. 375.1623, found: m/z 375.1623.

Pertinent ROESY correlations for stereochemistry:

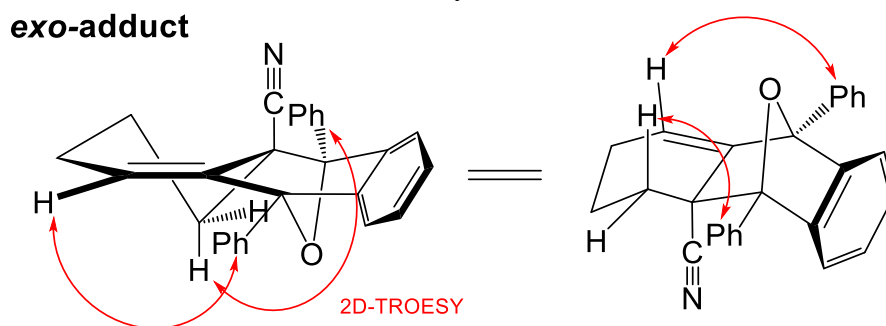

## General procedure for the synthesis of the cycloadducts **16a-16h** through Hetero-Diels-Alder trapping of cyclic allenes derived from **5a,b** with electron-rich heterodienophiles

To a stirred solution of starting material **5** (0.3 mmol, 1.0 equiv.) and enamine **15** (3 mmol, 10 equiv.) in anhydrous THF (3 mL) under nitrogen atmosphere was added dropwise a solution of KO<sup>t</sup>Bu (0.45 mmol, 1.5 equiv.) in anhydrous THF (1.5 mL) at room temperature over 30 minutes. The reaction mixture was stirred for 3 h at room temperature and then it was quenched with NH<sub>4</sub>Cl sat. solution (10 mL) and extracted with Et<sub>2</sub>O (5 x 10 mL). The combined organic layers were dried over MgSO<sub>4</sub>, filtered, and concentrated under reduced pressure. The crude was further purified by column chromatography on Al<sub>2</sub>O<sub>3</sub> (neutral, Brockmann I, 40-160 μm) to afford the cycloadduct **16**. The column chromatography can be performed on silica as well, but for a slightly cleaner product we recommend the use of neutral alumina. When required HSQC was used for <sup>13</sup>C NMR assignments. Enamine **15** was either readily available or synthesized according with the literature.<sup>4-6</sup>

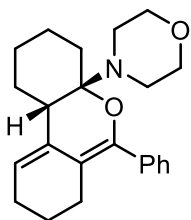

**16a**

110 mg of starting material **5a** was used. Flash chromatography (99:1 to 20:1 hexane:Et<sub>2</sub>O) on neutral alumina gave **16a** (76 mg, 65 %) as light yellow solid; *R<sub>f</sub>* 0.38 (hexanes/EtOAc 9:1); mp 94-96 °C; IR (cast film) cm<sup>-1</sup> 3083, 3054, 3034, 2933, 2851, 1684, 1598, 1492, 1446, 1263, 1118; <sup>1</sup>H NMR (500 MHz, CDCl<sub>3</sub>) δ 7.42 – 7.39 (m, 2H), 7.34 (t, *J* = 7.5 Hz, 2H), 7.29 – 7.25 (m, 1H), 5.34 (t, *J* = 4.2 Hz, 1H), 3.61 (t, *J* = 4.6 Hz, 4H), 2.80 – 2.68 (m, 4H), 2.48 (ddd, *J* = 14.5, 6.0, 3.9 Hz, 1H), 2.39 (ddd, *J* = 14.6, 10.8, 4.0 Hz, 1H), 2.32 (dd, *J* = 10.1, 4.7 Hz, 1H), 2.21 – 2.09 (m, 2H), 1.99 (dtd, *J* = 13.5, 3.9, 1.3 Hz, 1H), 1.74 – 1.55 (m, 7H), 1.34 (ddd, *J* = 13.6, 11.7, 4.6 Hz, 1H), 1.25 – 1.17 (m, 1H); <sup>13</sup>C NMR (126 MHz, CDCl<sub>3</sub>) δ 141.6, 136.8, 134.7, 128.8, 127.8, 127.4, 120.3, 108.8, 90.3, 67.9, 44.9, 42.0, 30.6, 27.9, 26.7, 26.0, 24.4, 24.1, 22.7; HRMS (ESI, [M+H]<sup>+</sup>) for C<sub>23</sub>H<sub>29</sub>NO<sub>2</sub> calcd. 352.2271, found: *m/z* 352.2275.

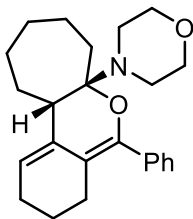

**16b**

104 mg of starting material **5a** was used. Flash chromatography (99:1 to 20:1 hexane: Et<sub>2</sub>O) on neutral alumina gave **16b** (28 mg, 24 %) as light yellow oil; *R<sub>f</sub>* 0.45 (hexanes/EtOAc 10:1); IR (cast film) cm<sup>-1</sup> 3057, 3023, 2925, 2853, 1663, 1597, 1449, 1276, 1119; <sup>1</sup>H NMR (500 MHz, CDCl<sub>3</sub>) δ 7.43 (dt, *J* = 6.3, 1.4 Hz, 2H), 7.33 (t, *J* = 7.6 Hz, 2H), 7.29 – 7.24 (m, 1H), 5.41 (td, *J* = 4.3, 1.2 Hz, 1H), 3.63 (t, *J* = 4.7 Hz, 4H), 2.78 (q, *J* = 4.7 Hz, 4H), 2.62 (d, *J* = 7.7 Hz, 1H), 2.52 – 2.36 (m, 2H), 2.18 (ddt, *J* = 8.1, 5.7, 3.1 Hz, 2H), 2.09 – 1.92 (m, 2H), 1.87 (ddd, *J* = 14.9, 7.2, 3.5 Hz, 1H), 1.80 – 1.39 (m, 7H), 1.36 – 1.16 (m, 2H); <sup>13</sup>C NMR (126 MHz, CDCl<sub>3</sub>) δ 143.0, 136.4, 135.7, 128.8, 127.7, 127.5, 119.6, 108.7, 93.8, 67.9, 45.6, 44.1, 31.1, 28.5, 28.1, 26.8, 26.1, 26.0, 23.8, 21.7; HRMS (ESI, [M+H]<sup>+</sup>) for C<sub>24</sub>H<sub>31</sub>NO<sub>2</sub> calcd. 366.2428, found: *m/z* 366.2417.

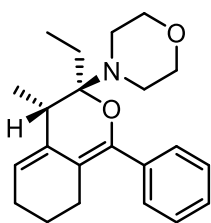

**16c**

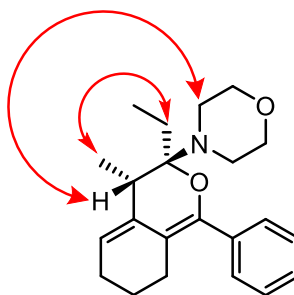

**16c**

Relevant 2D-TROESY for **16c**

94 mg of starting material **5a** was used. Flash chromatography (99:1 to 20:1 hexane: Et<sub>2</sub>O) on neutral alumina gave **16c** (28 mg, 29 %) as light yellow oil; *R<sub>f</sub>* 0.42 (hexanes/EtOAc 10:1); IR (cast film) cm<sup>-1</sup> 3053, 3019, 2970, 2919, 2885, 2851, 1664, 1634, 1615, 1597, 1491, 1446, 1271, 1175, 1120, 1070; <sup>1</sup>H NMR (500 MHz, CDCl<sub>3</sub>) δ 7.45 – 7.41 (m, 2H), 7.36 – 7.31 (m, 2H), 7.29 – 7.23 (m, 1H), 5.46 (td, *J* = 4.2, 1.3 Hz, 1H), 3.67 – 3.59 (m, 4H), 3.00 – 2.88 (m, 4H), 2.76 – 2.69 (m, 1H), 2.50 – 2.40 (m, 2H), 2.22 – 2.14 (m, 2H), 1.93 – 1.81 (m, 2H), 1.72 – 1.60 (m, 2H), 1.11 (d, *J* = 6.9 Hz, 3H), 0.94 (t, *J* = 7.6 Hz, 3H); <sup>13</sup>C NMR (126 MHz, CDCl<sub>3</sub>) δ 143.9, 136.4, 136.0, 128.8, 127.7, 127.6, 119.8, 108.1, 94.3, 68.0, 45.8, 36.7, 26.7, 26.1, 25.5, 23.8, 14.4, 8.9; HRMS (ESI, [M+H]<sup>+</sup>) for C<sub>22</sub>H<sub>29</sub>NO<sub>2</sub> calcd. 340.2271, found: *m/z* 340.2271.

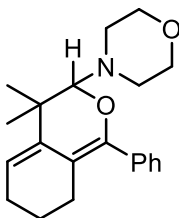

**16d**

96 mg of starting material **5a** was used. Flash chromatography (99:1 to 20:1 hexane: Et<sub>2</sub>O) on neutral alumina gave **16d** (9 mg, 9 %) as light yellow oil; *R<sub>f</sub>* 0.40 (hexanes/EtOAc 10:1); IR (cast film) cm<sup>-1</sup> 3057, 3034, 2957, 2930, 2855, 1667, 1597, 1491, 1448, 1254, 1119, 1066; <sup>1</sup>H



NMR (500 MHz, CDCl<sub>3</sub>)  $\delta$  7.54 – 7.50 (m, 2H), 7.39 – 7.34 (m, 2H), 7.32 – 7.28 (m, 1H), 5.58 (t,  $J$  = 4.3 Hz, 1H), 4.26 (s, 1H), 3.72 – 3.56 (m, 4H), 3.24 – 3.17 (m, 2H), 2.75 – 2.68 (m, 2H), 2.46 – 2.32 (m, 2H), 2.22 – 2.10 (m, 2H), 1.72 – 1.63 (m, 1H), 1.52 – 1.44 (m, 1H), 1.21 (s, 3H), 1.18 (s, 3H); <sup>13</sup>C NMR (126 MHz, CDCl<sub>3</sub>)  $\delta$  145.7, 139.1, 136.1, 128.8, 128.0, 127.9, 115.5, 106.7, 98.3, 67.5, 49.4, 36.5, 30.4, 26.8, 26.0, 23.2, 23.2; HRMS (ESI, [M+H]<sup>+</sup>) for C<sub>21</sub>H<sub>27</sub>NO<sub>2</sub> calcd. 326.2115, found: m/z 326.2113.

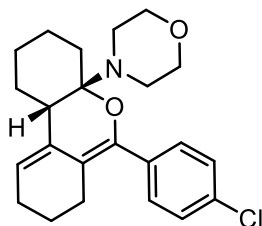

**16e**

112 mg of starting material **5b** was used. Flash chromatography (99:1 to 20:1 hexane: Et<sub>2</sub>O) on neutral alumina gave **16e** (54 mg, 46 %) as light yellow oil;  $R_f$  0.28 (hexanes/EtOAc 10:1); IR (cast film) cm<sup>-1</sup> 3034, 2931, 2854, 1680, 1592, 1489, 1448, 1279, 1118, 1094; <sup>1</sup>H NMR (500 MHz, CDCl<sub>3</sub>)  $\delta$  7.33 (d,  $J$  = 8.6 Hz, 2H), 7.29 (d,  $J$  = 8.6 Hz, 2H), 5.36 (t,  $J$  = 4.2 Hz, 1H), 3.59 (t,  $J$  = 4.6 Hz, 4H), 2.79 – 2.64 (m, 4H), 2.45 (ddd,  $J$  = 14.5, 6.0, 4.0 Hz, 1H), 2.38 (dd,  $J$  = 10.6, 4.0 Hz, 1H), 2.34 – 2.28 (m, 1H), 2.20 – 2.08 (m, 2H), 2.01 – 1.93 (m, 1H), 1.75 – 1.46 (m, 7H), 1.38 – 1.29 (m, 1H), 1.25 – 1.16 (m, 1H); <sup>13</sup>C NMR (126 MHz, CDCl<sub>3</sub>)  $\delta$  140.5, 135.2, 134.5, 133.1, 130.1, 128.0, 120.9, 109.3, 90.4, 67.9, 44.9, 41.9, 30.6, 27.9, 26.7, 25.9, 24.3, 24.0, 22.7; HRMS (ESI, [M+H]<sup>+</sup>) for C<sub>23</sub>H<sub>28</sub>ClNO<sub>2</sub> calcd. 386.1881, found: m/z 386.1872.

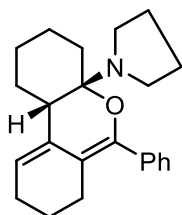

**16f**

104 mg of starting material **5a** was used. Flash chromatography (99:1 to 20:1 hexane: Et<sub>2</sub>O) on neutral alumina gave **16f** (53 mg, 51 %) as light yellow oil;  $R_f$  0.30 (hexanes/EtOAc 10:1); IR (cast film) cm<sup>-1</sup> 3054, 3034, 2929, 2856, 1673, 1597, 1447, 1270, 1113; <sup>1</sup>H NMR (500 MHz, CDCl<sub>3</sub>)  $\delta$  7.44 (d,  $J$  = 7.6 Hz, 2H), 7.34 (t,  $J$  = 7.5 Hz, 2H), 7.26 (t,  $J$  = 7.4 Hz, 1H), 5.54 (t,  $J$  = 4.6 Hz, 1H), 2.98 – 2.87 (m, 4H), 2.67 (s, 1H), 2.44 (t,  $J$  = 6.2 Hz, 2H), 2.25 – 2.14 (m, 2H), 2.10 – 2.00 (m, 1H), 1.90 – 1.52 (m, 10H), 1.35 – 1.24 (m, 3H); <sup>13</sup>C NMR (126 MHz, CDCl<sub>3</sub>)  $\delta$  144.4, 137.1, 133.3, 128.9, 127.6, 127.3, 119.4, 106.8, 91.4, 44.1, 41.3, 29.7, 28.3, 26.8, 26.1, 24.6, 23.5, 23.5, 21.5; HRMS (ESI, [M+H]<sup>+</sup>) for C<sub>23</sub>H<sub>29</sub>NO calcd. 336.2322, found: m/z 336.2325.

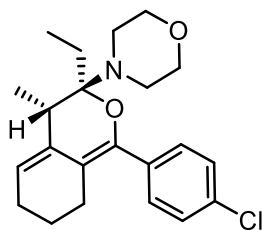

**16g**

103 mg of starting material **5b** was used. Flash chromatography (99:1 to 20:1 hexane: Et<sub>2</sub>O) on neutral alumina gave **16g** (20 mg, 19 %) as light yellow oil; *R<sub>f</sub>* 0.47 (hexanes/EtOAc 10:1); IR (cast film) cm<sup>-1</sup> 3042, 2971, 2932, 2886, 2851, 1672, 1613, 1591, 1489, 1450, 1270, 1120; <sup>1</sup>H NMR (500 MHz, CDCl<sub>3</sub>) δ 7.35 (d, *J* = 8.5 Hz, 2H), 7.29 (d, *J* = 8.5 Hz, 2H), 5.49 (dt, *J* = 5.2, 2.5 Hz, 1H), 3.63 (t, *J* = 4.6 Hz, 4H), 2.91 (t, *J* = 4.7 Hz, 4H), 2.76 – 2.67 (m, 1H), 2.48 – 2.34 (m, 2H), 2.25 – 2.11 (m, 2H), 1.94 – 1.78 (m, 2H), 1.75 – 1.54 (m, 2H), 1.09 (d, *J* = 6.9 Hz, 3H), 0.93 (t, *J* = 7.6 Hz, 3H); <sup>13</sup>C NMR (126 MHz, CDCl<sub>3</sub>) δ 142.9, 135.7, 134.9, 133.3, 130.1, 127.9, 120.4, 108.6, 94.5, 67.9, 45.8, 36.7, 26.7, 26.0, 25.4, 23.7, 14.3, 8.9; HRMS (ESI, [M+H]<sup>+</sup>) for C<sub>22</sub>H<sub>28</sub>ClNO<sub>2</sub> calcd. 374.1881, found: *m/z* 374.1881.

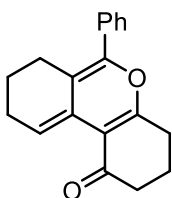

**16h**

116 mg of starting material **5a** was used. Flash chromatography (99:1 to 20:1 hexane:EtOAc) on silica gave **16h** (6 mg, 6 %) as light yellow oil, which in contact with the air becomes dark red; *R<sub>f</sub>* 0.30 (hexanes/EtOAc 20:1); IR (cast film) cm<sup>-1</sup> 3057, 2929, 2851, 1716, 1660, 1597, 1581, 1448, 1393, 1278; <sup>1</sup>H NMR (500 MHz, CDCl<sub>3</sub>) δ 7.47 – 7.37 (m, 5H), 6.94 (t, *J* = 4.6 Hz, 1H), 2.57 – 2.49 (m, 4H), 2.47 – 2.41 (m, 2H), 2.31 – 2.26 (m, 2H), 2.03 (p, *J* = 6.4 Hz, 2H), 1.64 (p, *J* = 6.1 Hz, 2H); <sup>13</sup>C NMR (126 MHz, CDCl<sub>3</sub>) δ 197.6, 168.4, 142.3, 133.4, 128.8, 128.6, 128.2, 122.4, 117.3, 117.0, 112.4, 39.1, 28.8, 26.4, 25.5, 21.1, 20.3; HRMS (EI, M<sup>+</sup>) for C<sub>19</sub>H<sub>18</sub>O<sub>2</sub> calcd. 278.1307, found: *m/z* 278.1300.

## References

1. E. Fos, L. Borràs, M. Gasull, D. Mauleón and G. Carganico, *J. Heterocyclic Chem.*, 1992, **29**, 203.
2. Z. Jia, E. Gálvez, R. M. Sebastián, R. Pleixats, Á. Álvarez-Larena, E. Martín, A. Vallribera and A. Shafir, *Angew. Chem. Int. Ed.*, 2014, **53**, 11298.
3. H.-S. Lin, A. A. Rampersaud, K. Zimmerman, M. I. Steinberg and D. B. Boyd, *J. Med. Chem.*, 1992, **35**, 2658.
4. May, G. L.; Pinhey, J. T. *Aust. J. Chem.* **1982**, 35 (9), 1859.
5. Carlson, R.; Nilsson, Å.; Strömqvist, M. *Acta Chem. Scand. B* **1983**, 37, 7.
6. Carlson, R.; Nilsson, Å. *Acta Chem. Scand. B* **1984**, 38, 49.

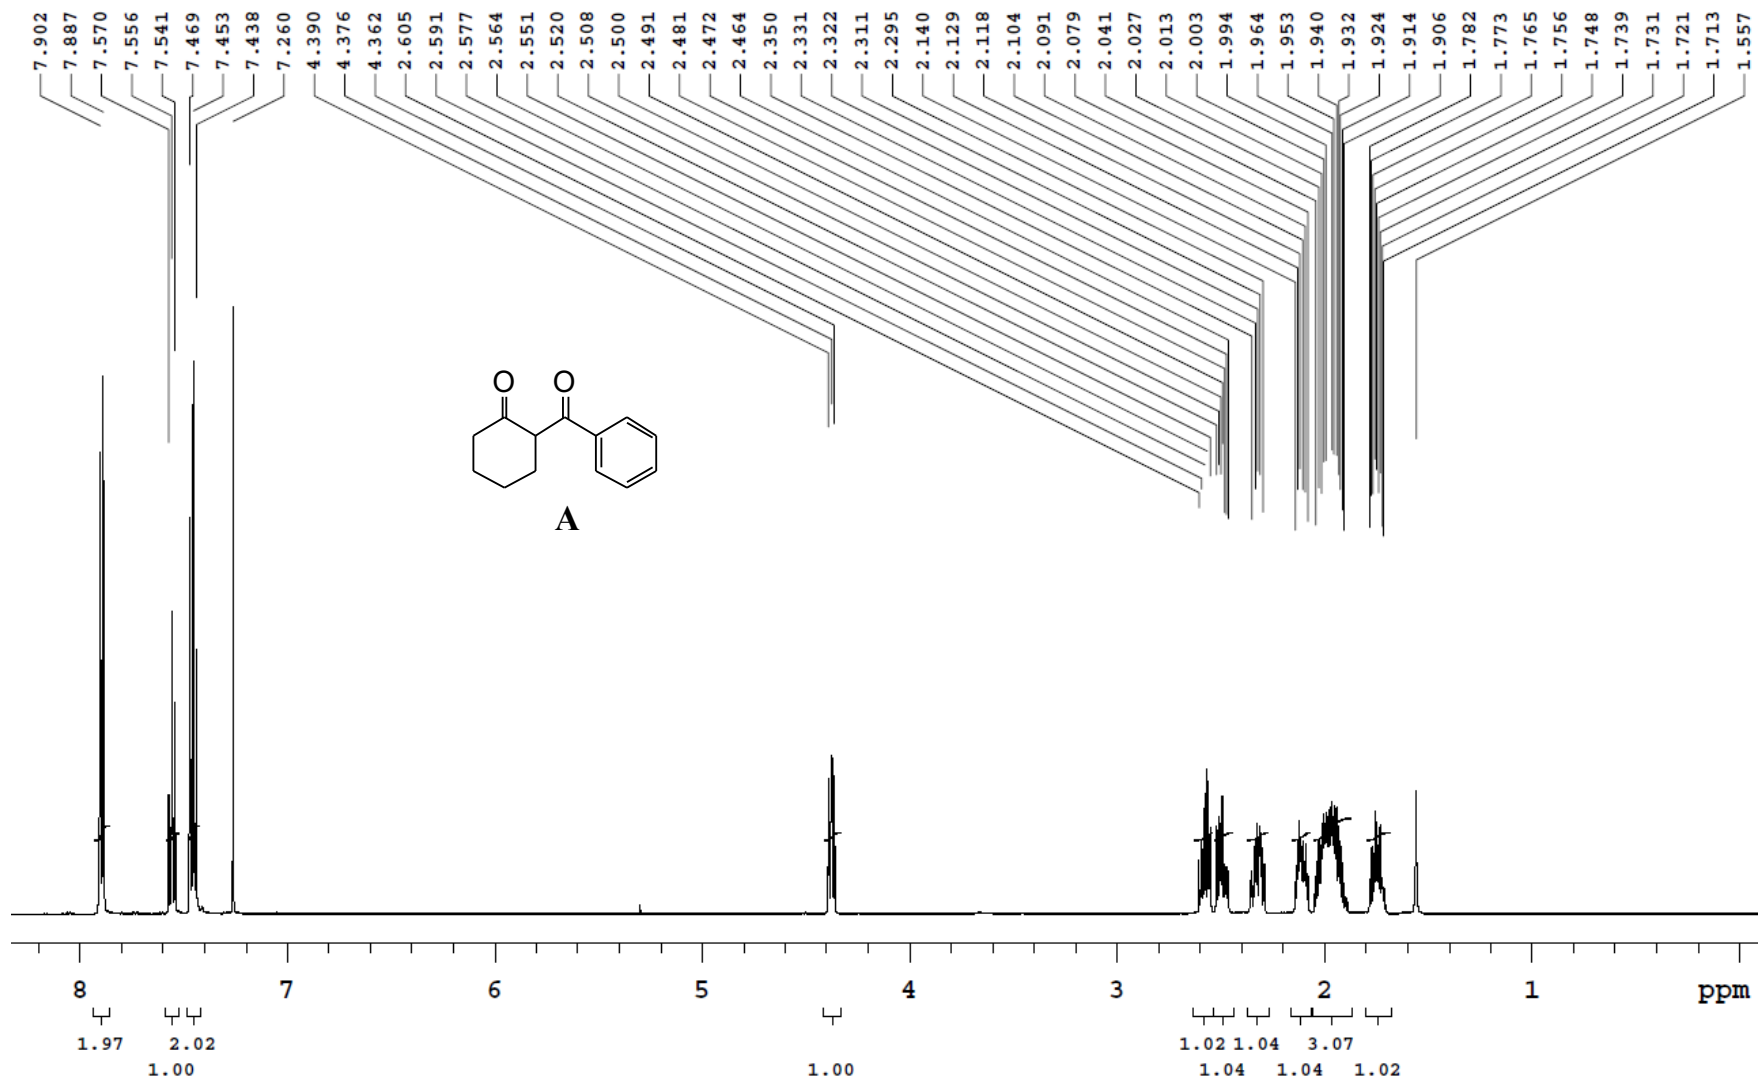

Baolei, BLW-1-4-a  
125.691 MHz C13[H1] 1D in cdcl3 (ref. to CDCl3 @ 77.06 ppm), temp 27.7 C -> actual temp = 27.0 C, cold dual probe

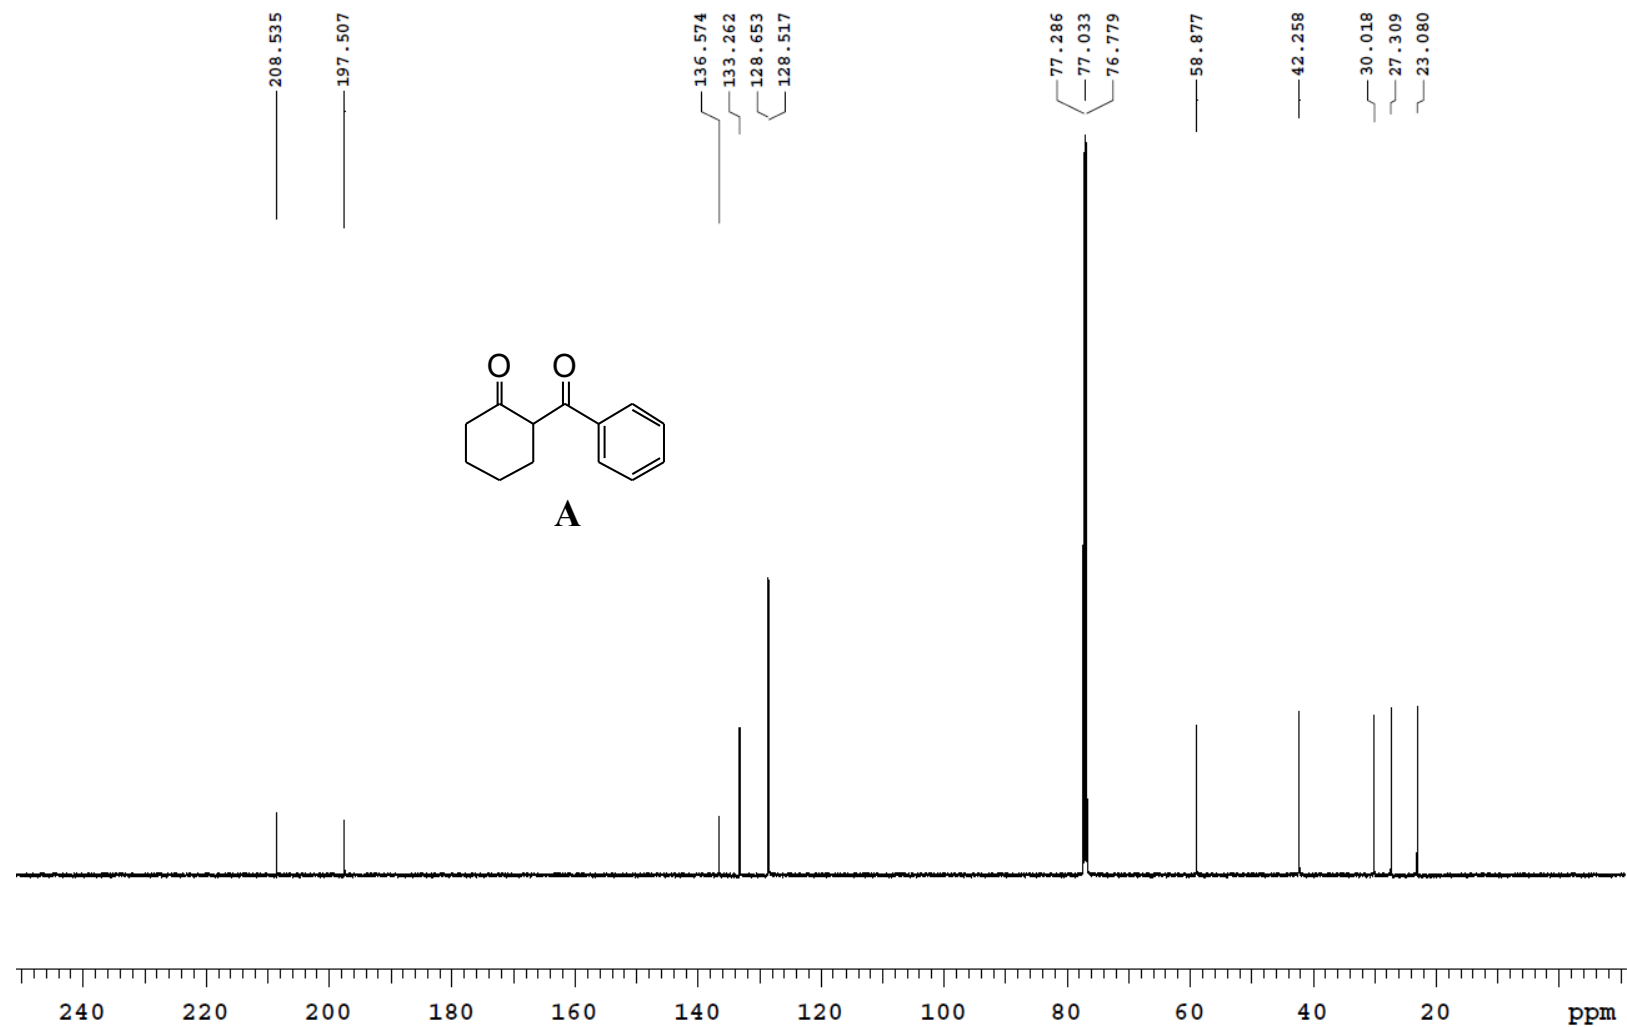

Baolei, BLW-I-7\_2  
499.806 MHz H1 PRESAT in cdcl3 (ref. to CDCl3 @ 7.26 ppm), temp 27.7 C -> actual temp = 27.0 C, colddual probe

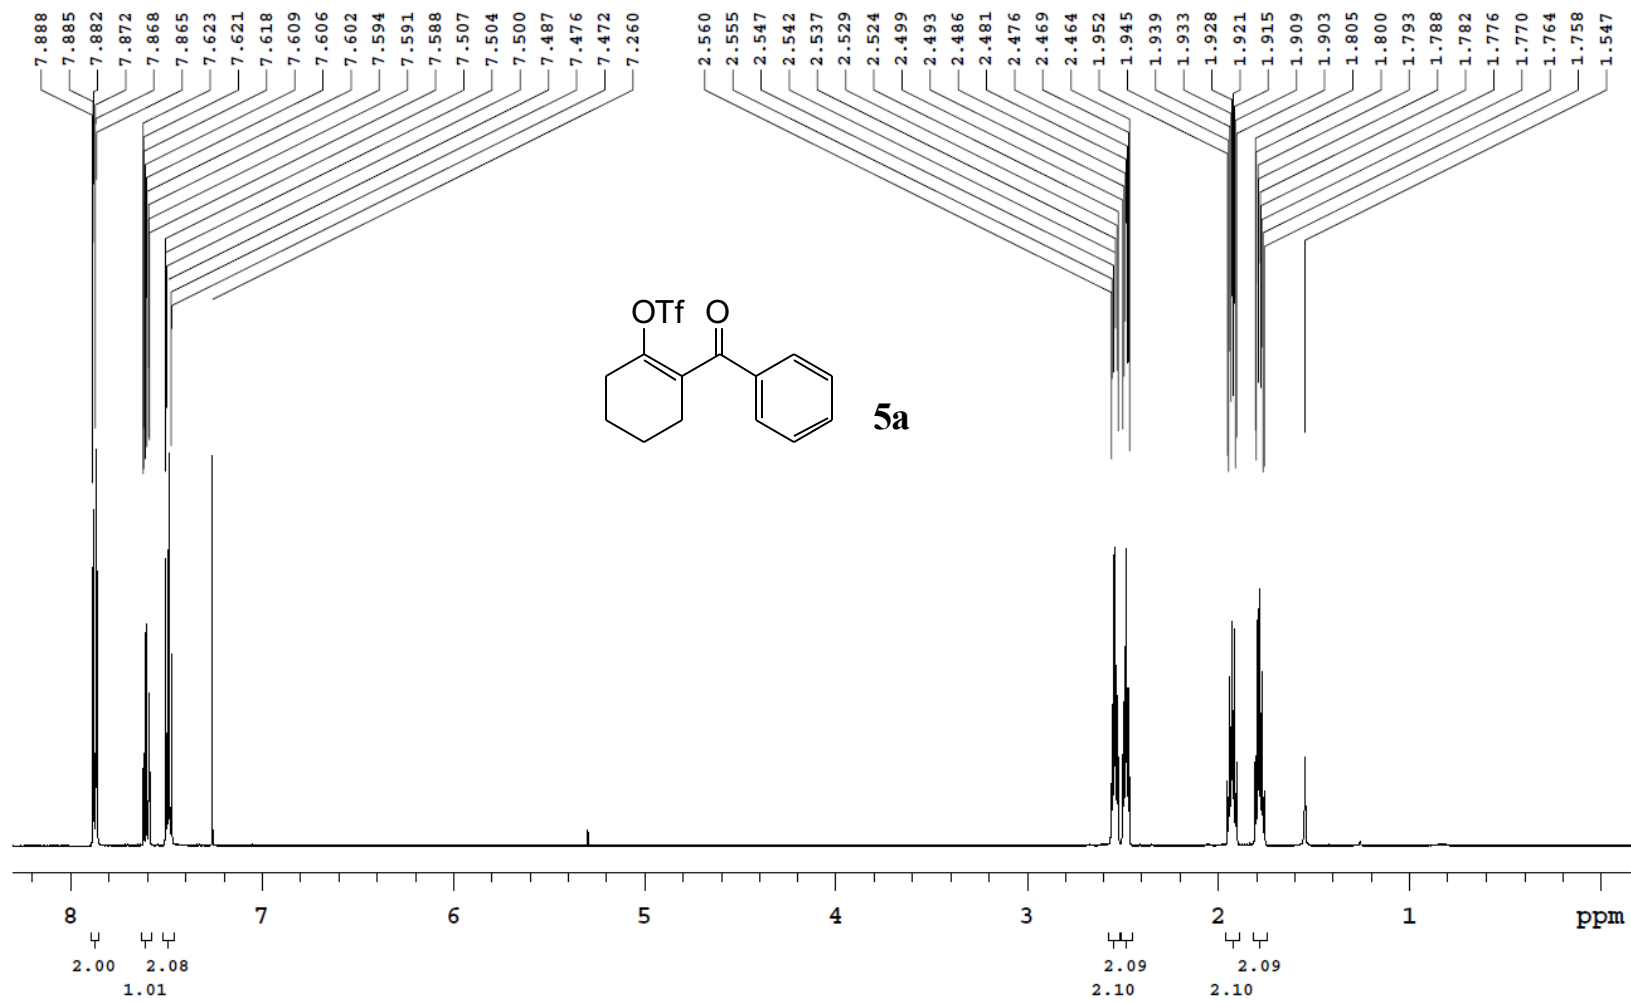

Baolei, BLW-1-7\_2  
125.690 MHz C13[H1] APT\_ad in cdcl3 (ref. to CDCl3 @ 77.06 ppm), temp 27.7 C -> actual temp = 27.0 C, cold dual probe  
C & CH2 same, CH & CH3 opposite side of solvent signal

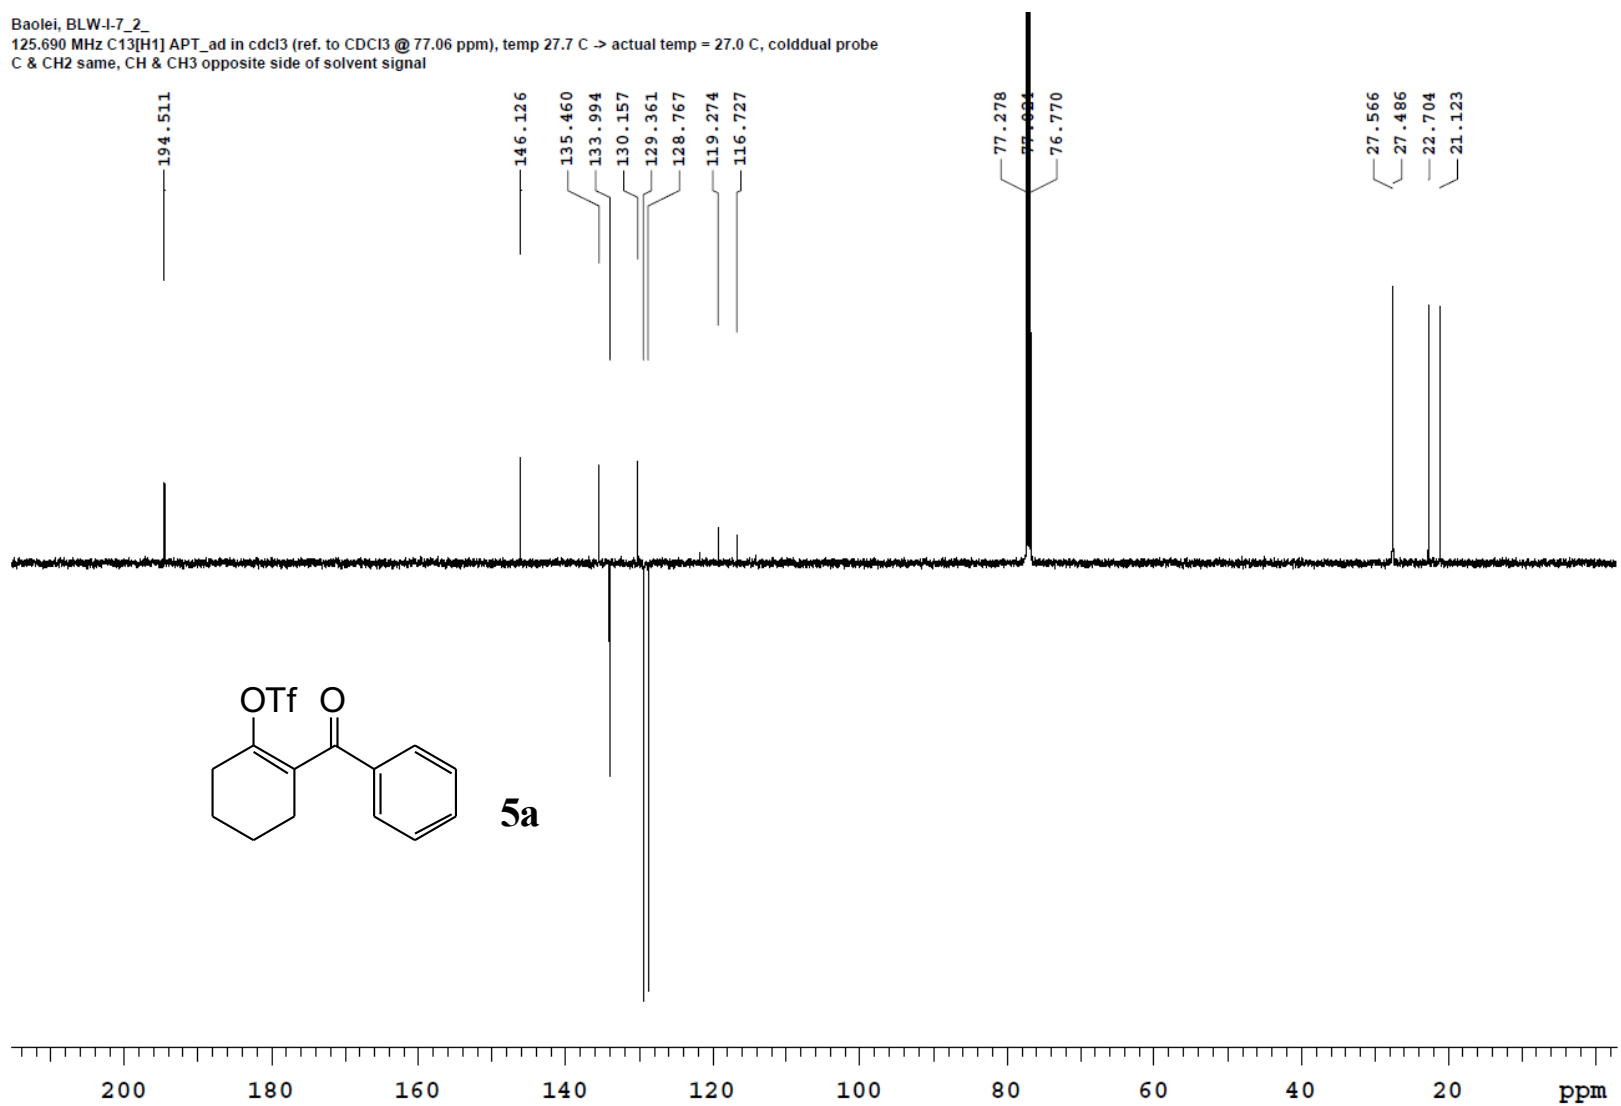

Baolei, BLW-I-81-1\_2  
499.806 MHz H1 PRESAT in cdcl3 (ref. to CDCl3 @ 7.26 ppm), temp 27.7 C -> actual temp = 27.0 C, cold dual probe

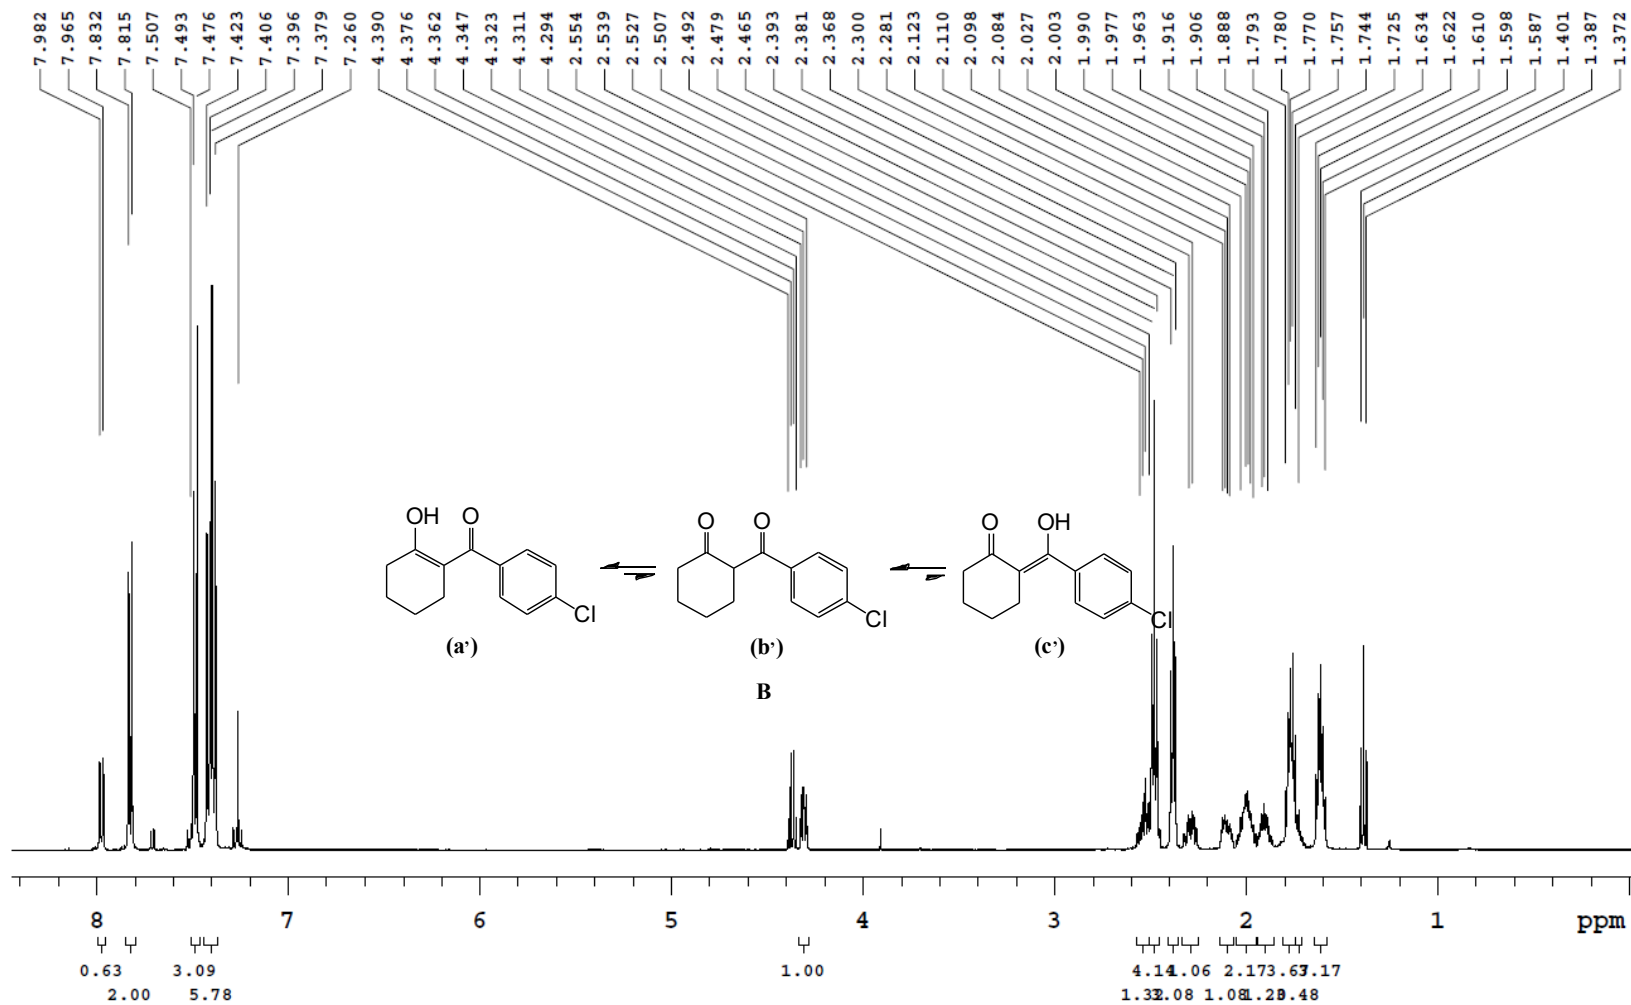

Baolei, BLW-I-81-1\_2  
125.690 MHz C13[H1] APT\_ad in cdcl3 (ref. to CDCl3 @ 77.06 ppm), temp 27.7 C -> actual temp = 27.0 C, cold dual probe  
C & CH2 same, CH & CH3 opposite side of solvent signal

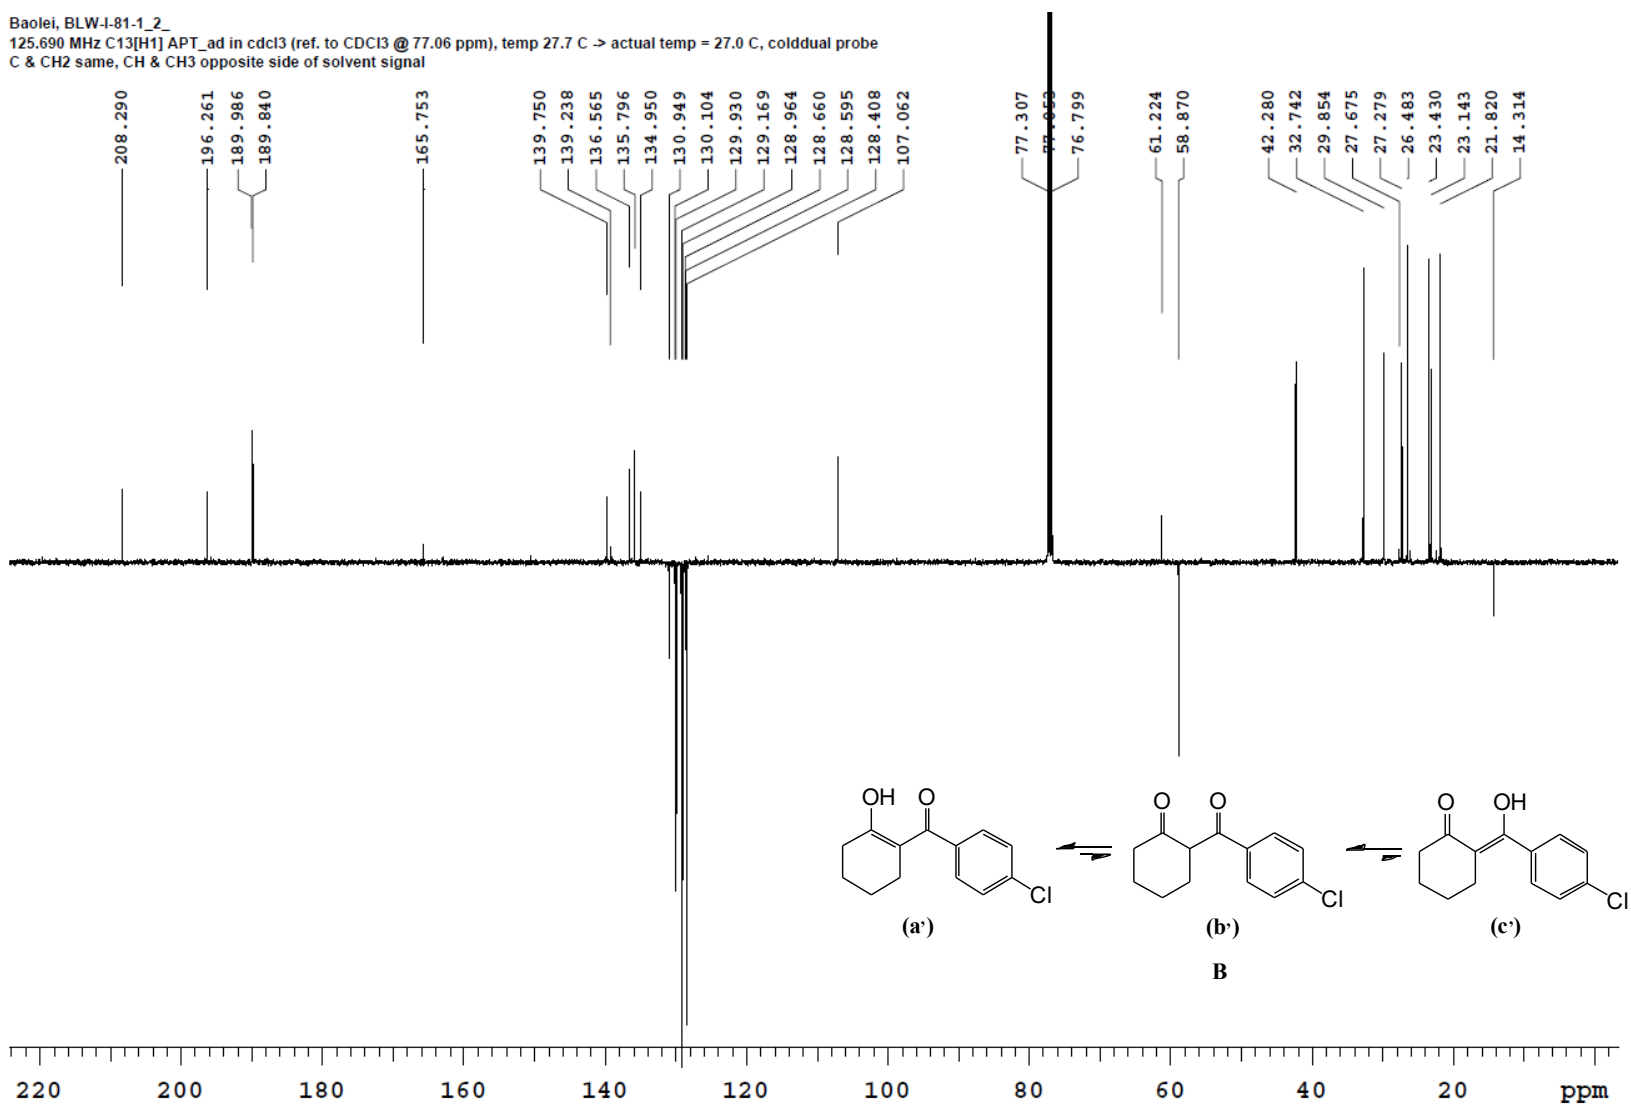



Baolei, BLW-I-83-1

499.806 MHz H1 PRESAT in cdcl3 (ref. to CDCl3 @ 7.26 ppm), temp 27.7 C -> actual temp = 27.0 C, cold dual probe

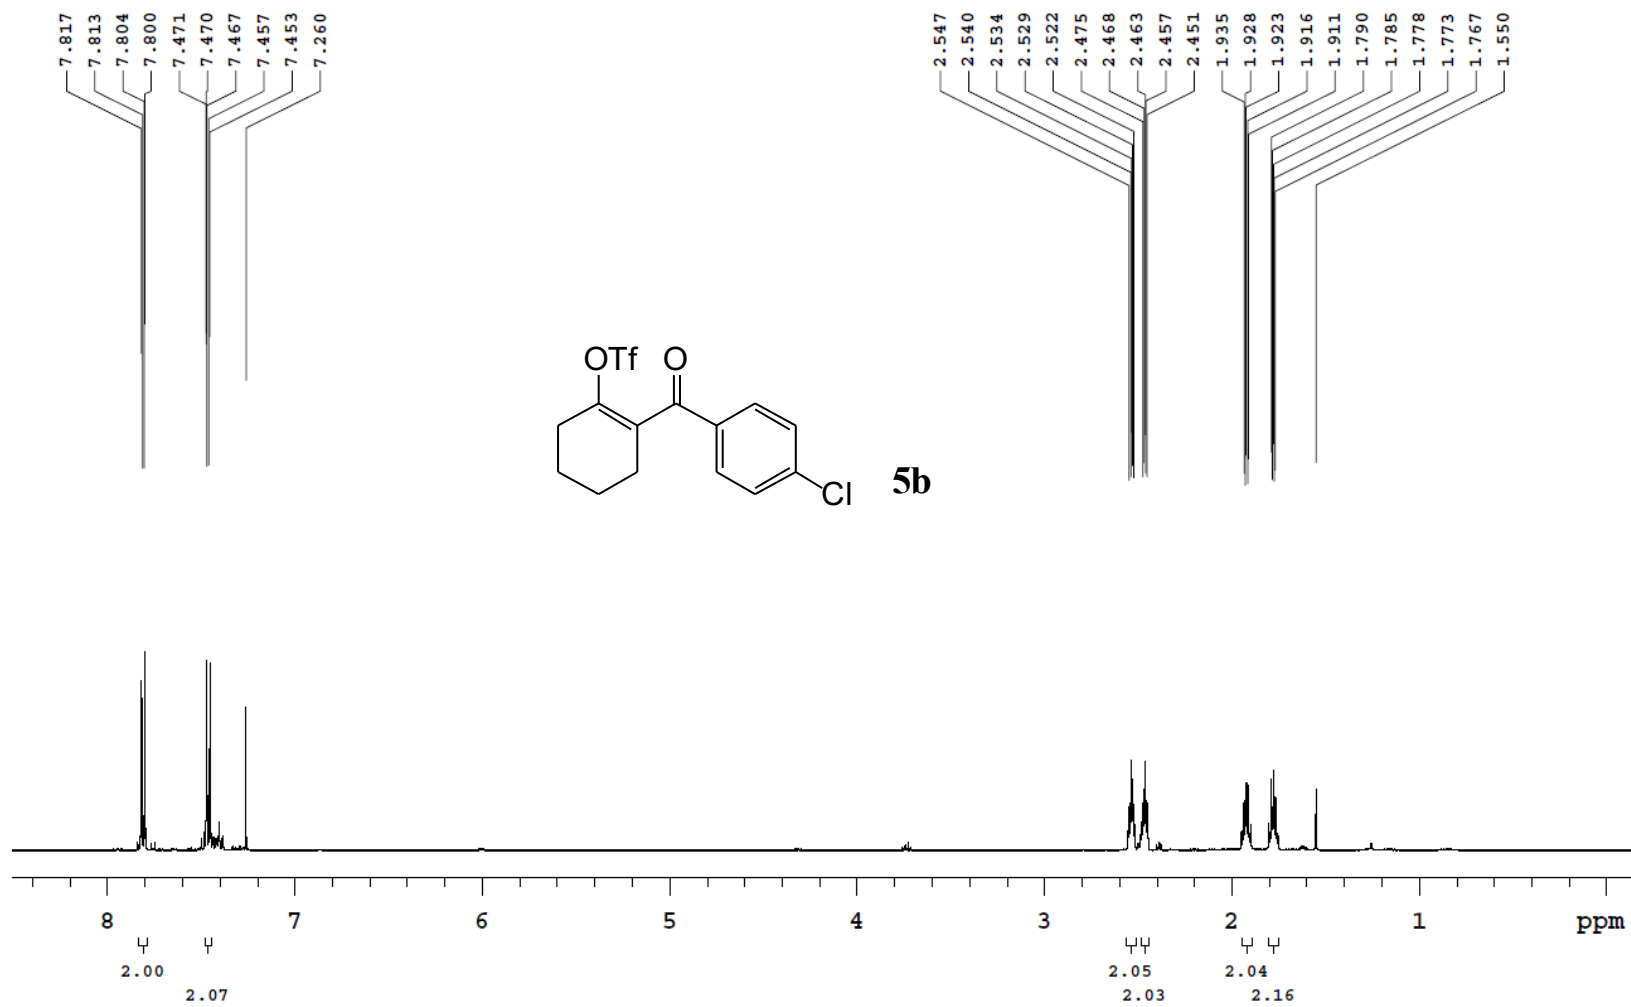

Baolei, BLW-I-83-1  
125.690 MHz C13[H1] APT\_ad in cdcl3 (ref. to CDC13 @ 77.06 ppm), temp 27.7 C -> actual temp = 27.0 C, cold dual probe  
C & CH2 same, CH & CH3 opposite side of solvent signal

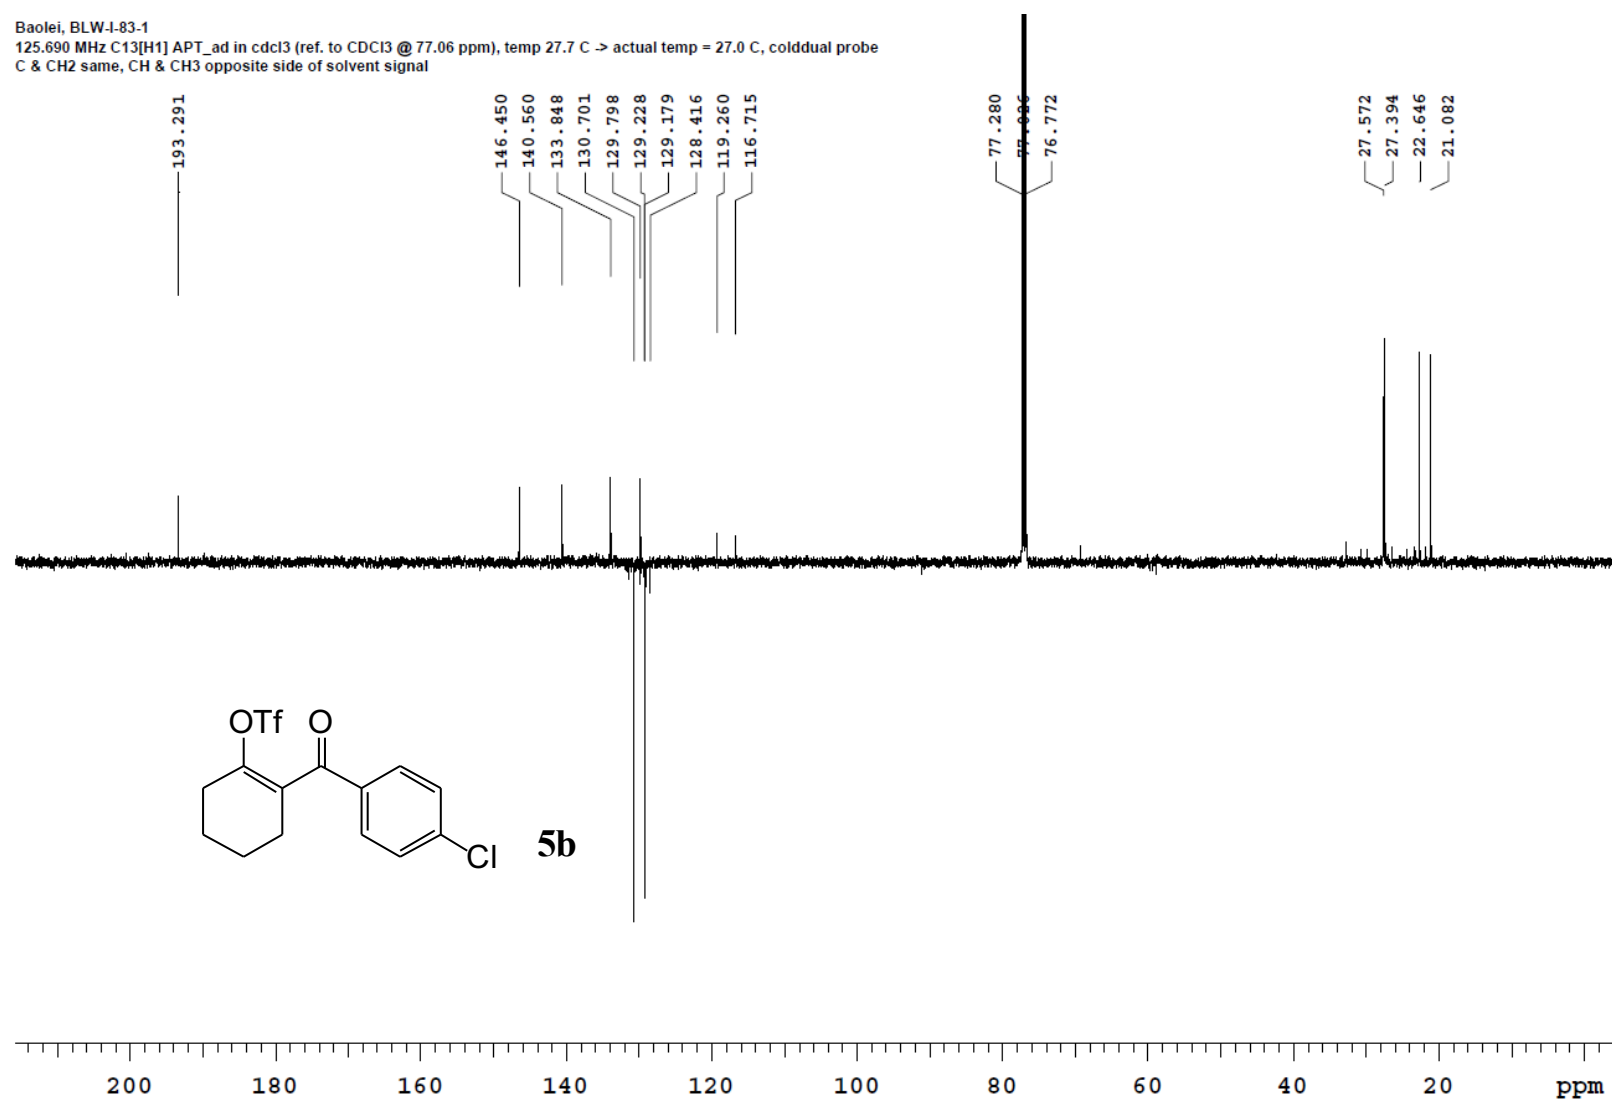

Baolei, BLW-I-32-1  
499.806 MHz H1 PRESAT in cdcl3 (ref. to CDCl3 @ 7.26 ppm), temp 27.7 C -> actual temp = 27.0 C, coldual probe

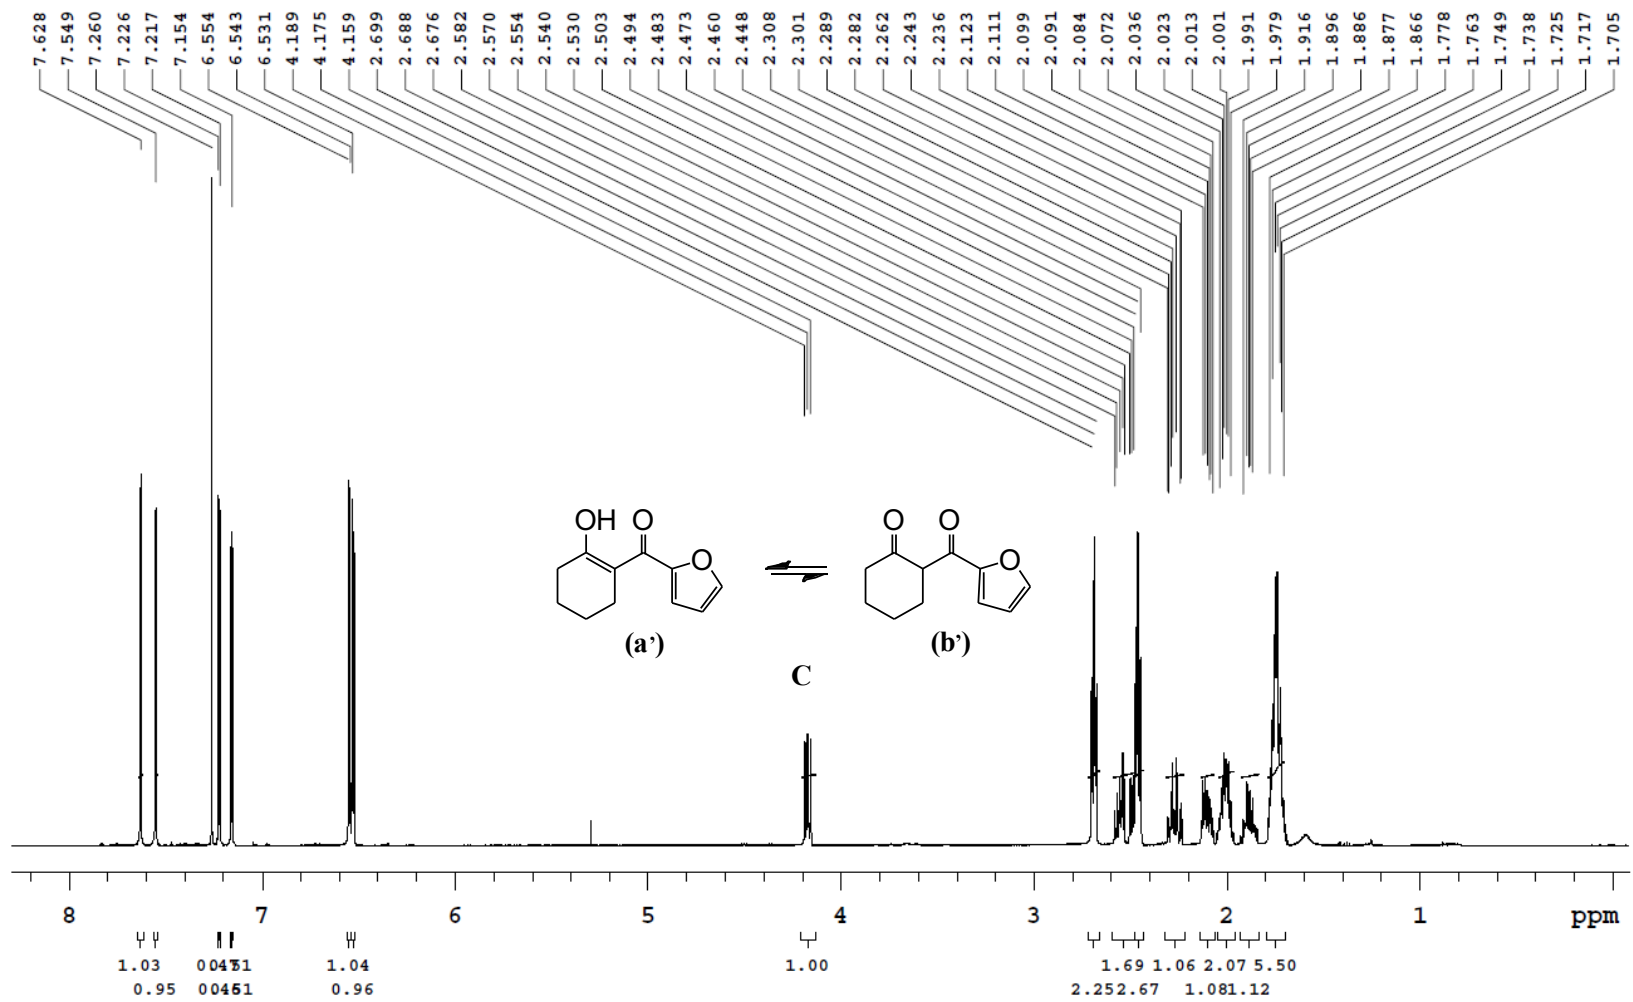

Baolei, BLW-I-32-1  
125.690 MHz C13[H1] APT\_ad in cdcl3 (ref. to CDC13 @ 77.06 ppm), temp 27.7 C -> actual temp = 27.0 C, cold dual probe  
C & CH2 same, CH & CH3 opposite side of solvent signal

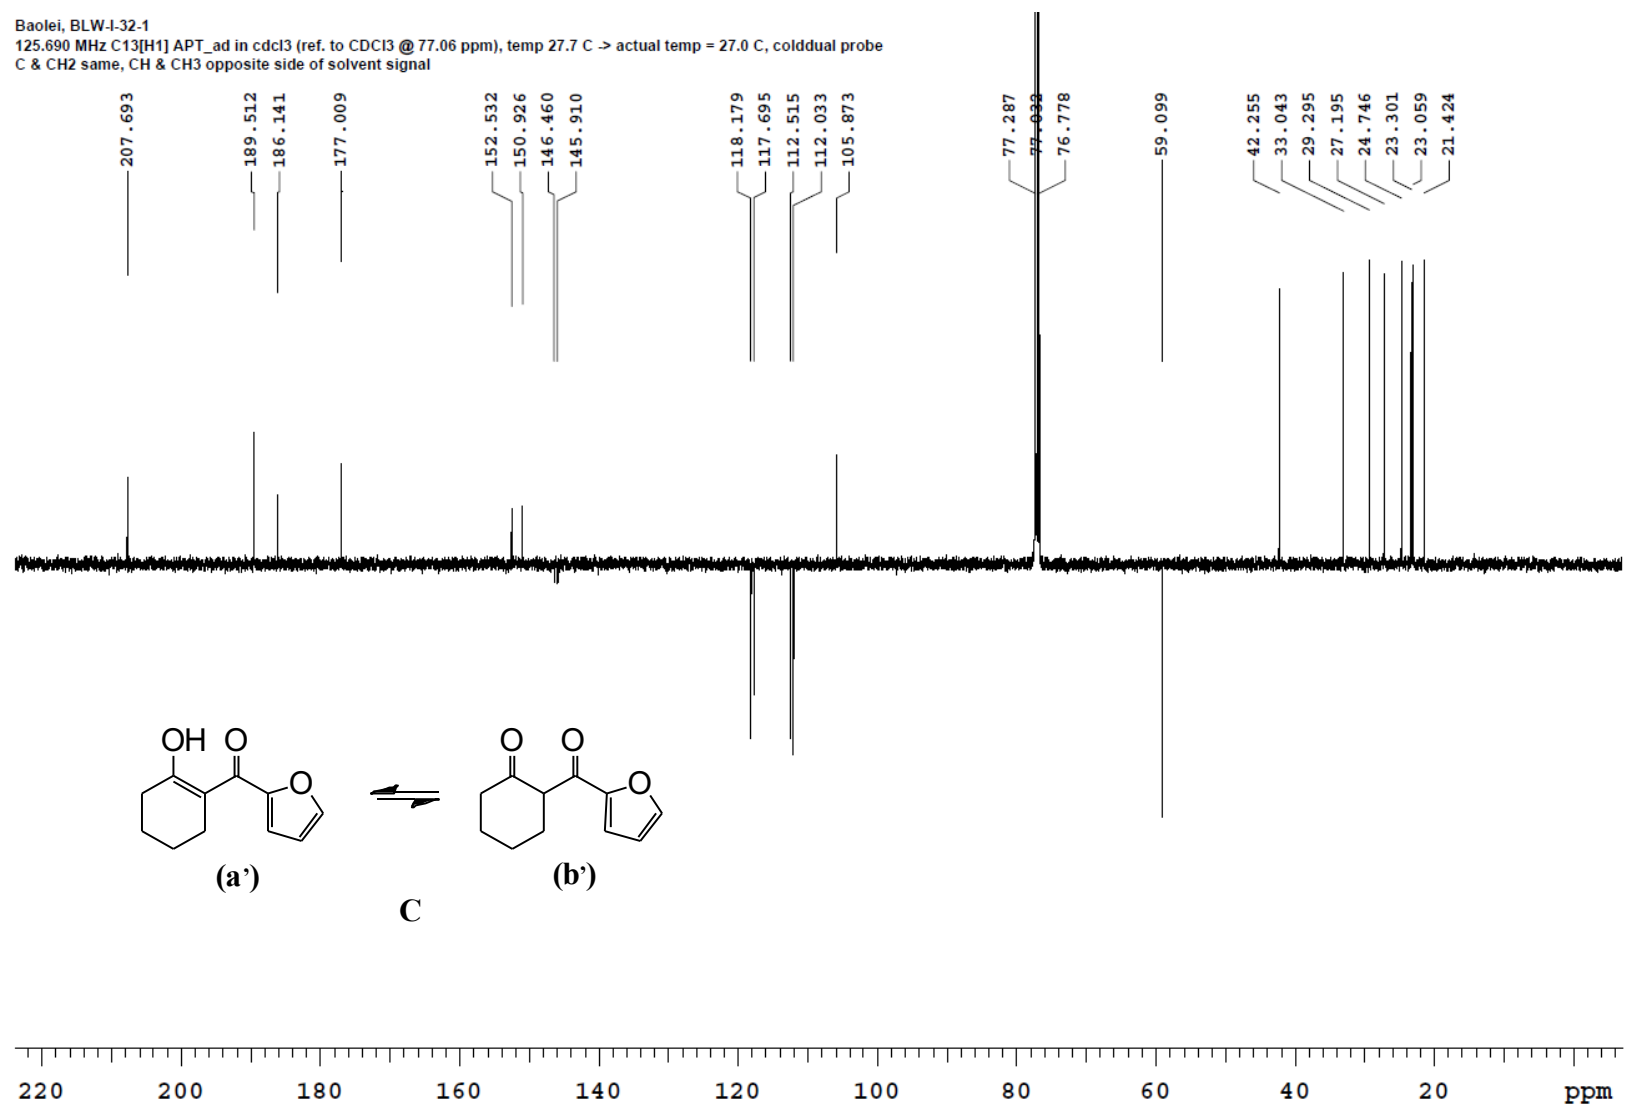

Baolei, BLW-I-45-1\_2\_

499.806 MHz H1 PRESAT in cdcl3 (ref. to CDCl3 @ 7.26 ppm), temp 27.7 C -> actual temp = 27.0 C, cold dual probe

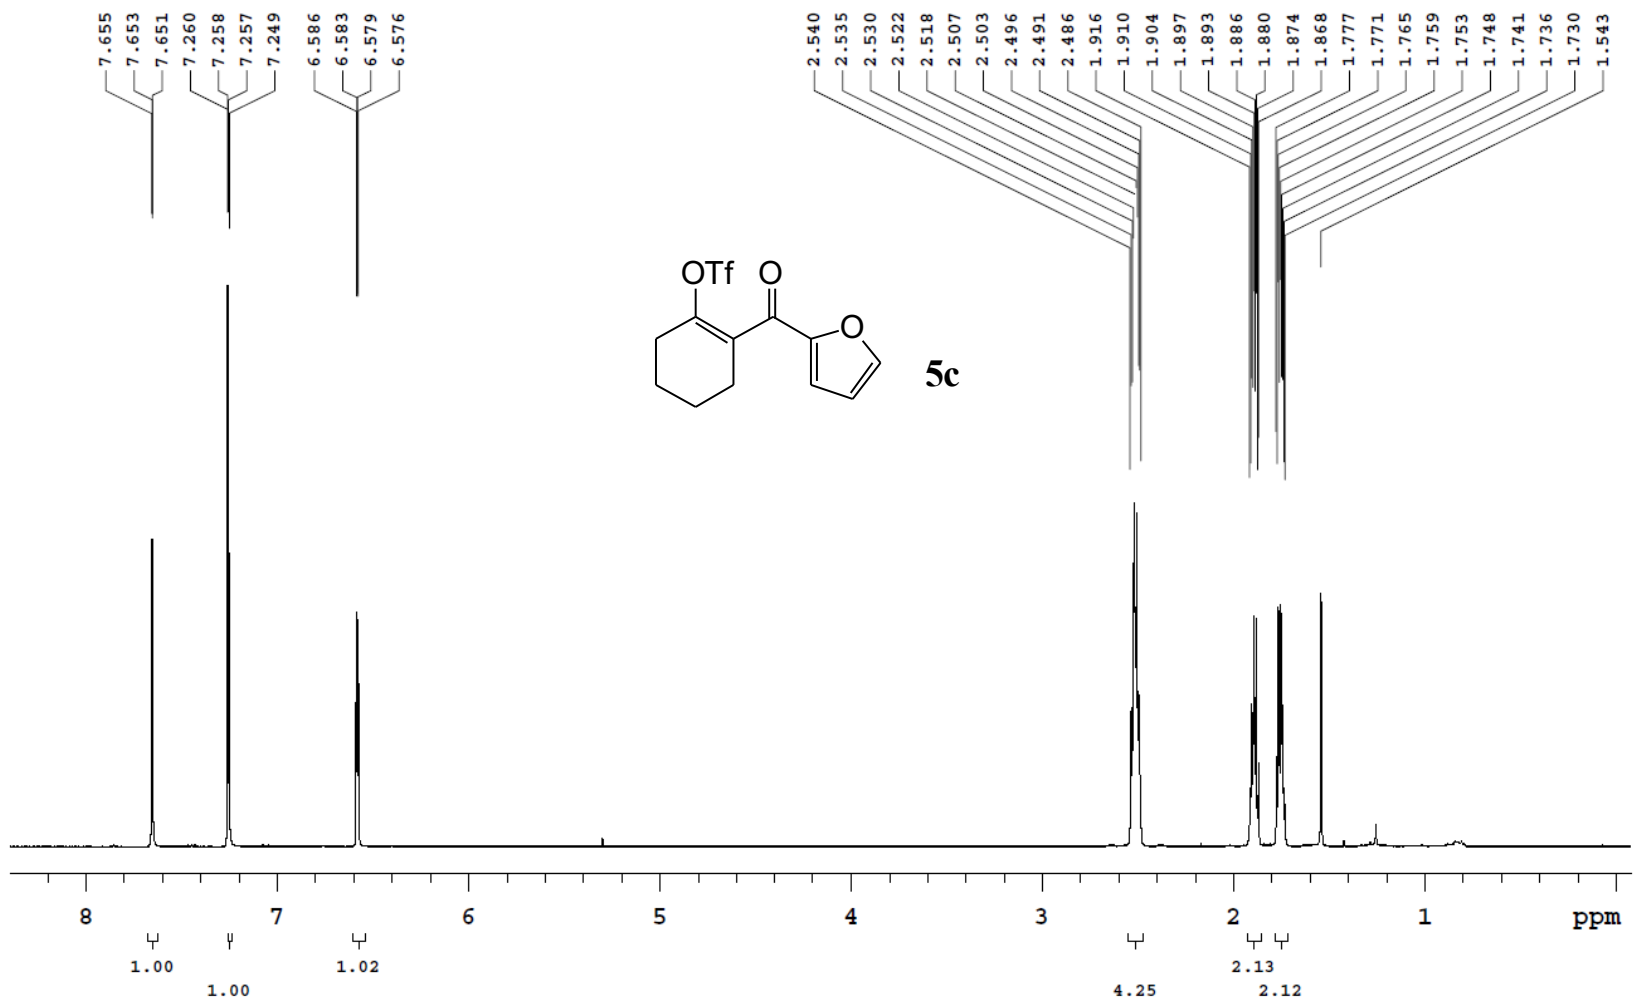

Baolei, BLW1-45-1\_2  
125.690 MHz C13[H1] APT\_ad in cdcl3 (ref. to CDC13 @ 77.06 ppm), temp 27.7 C -> actual temp = 27.0 C, cold dual probe  
C & CH2 same, CH & CH3 opposite side of solvent signal

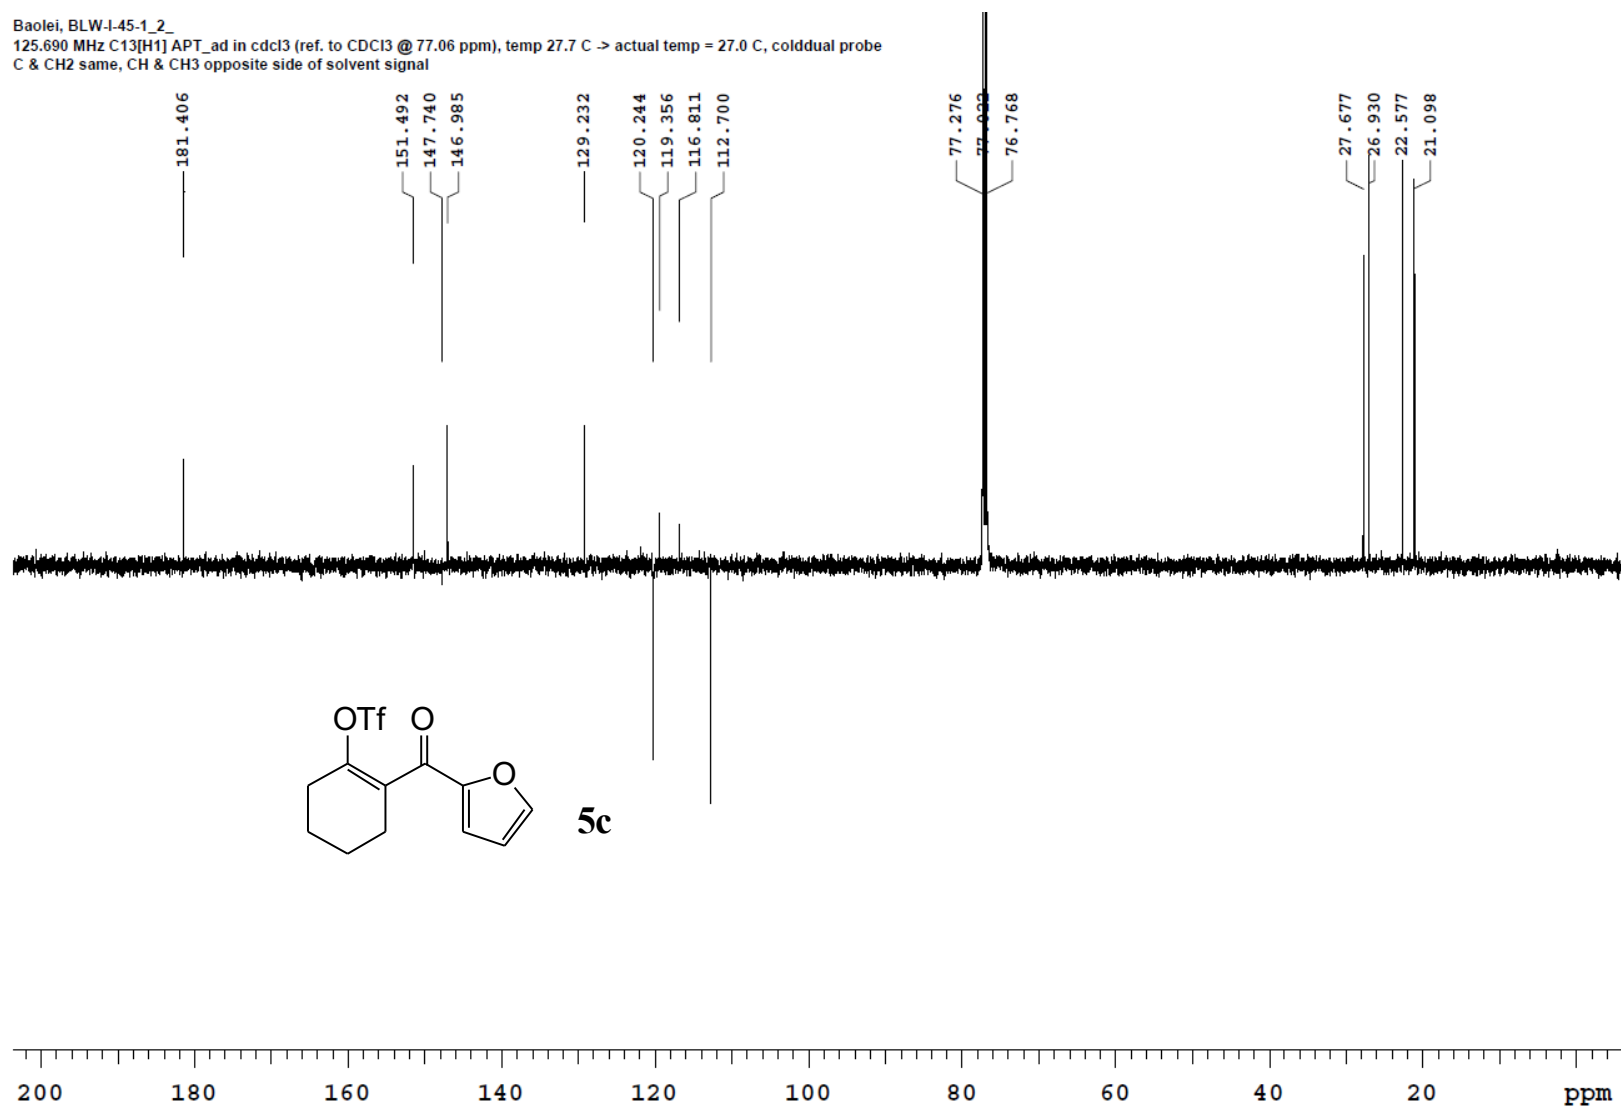

Baolei, BLW-I-144-a

499.806 MHz H1 PRESAT in cdcl3 (ref. to CDCl3 @ 7.26 ppm), temp 27.7 C -> actual temp = 27.0 C, colddual probe

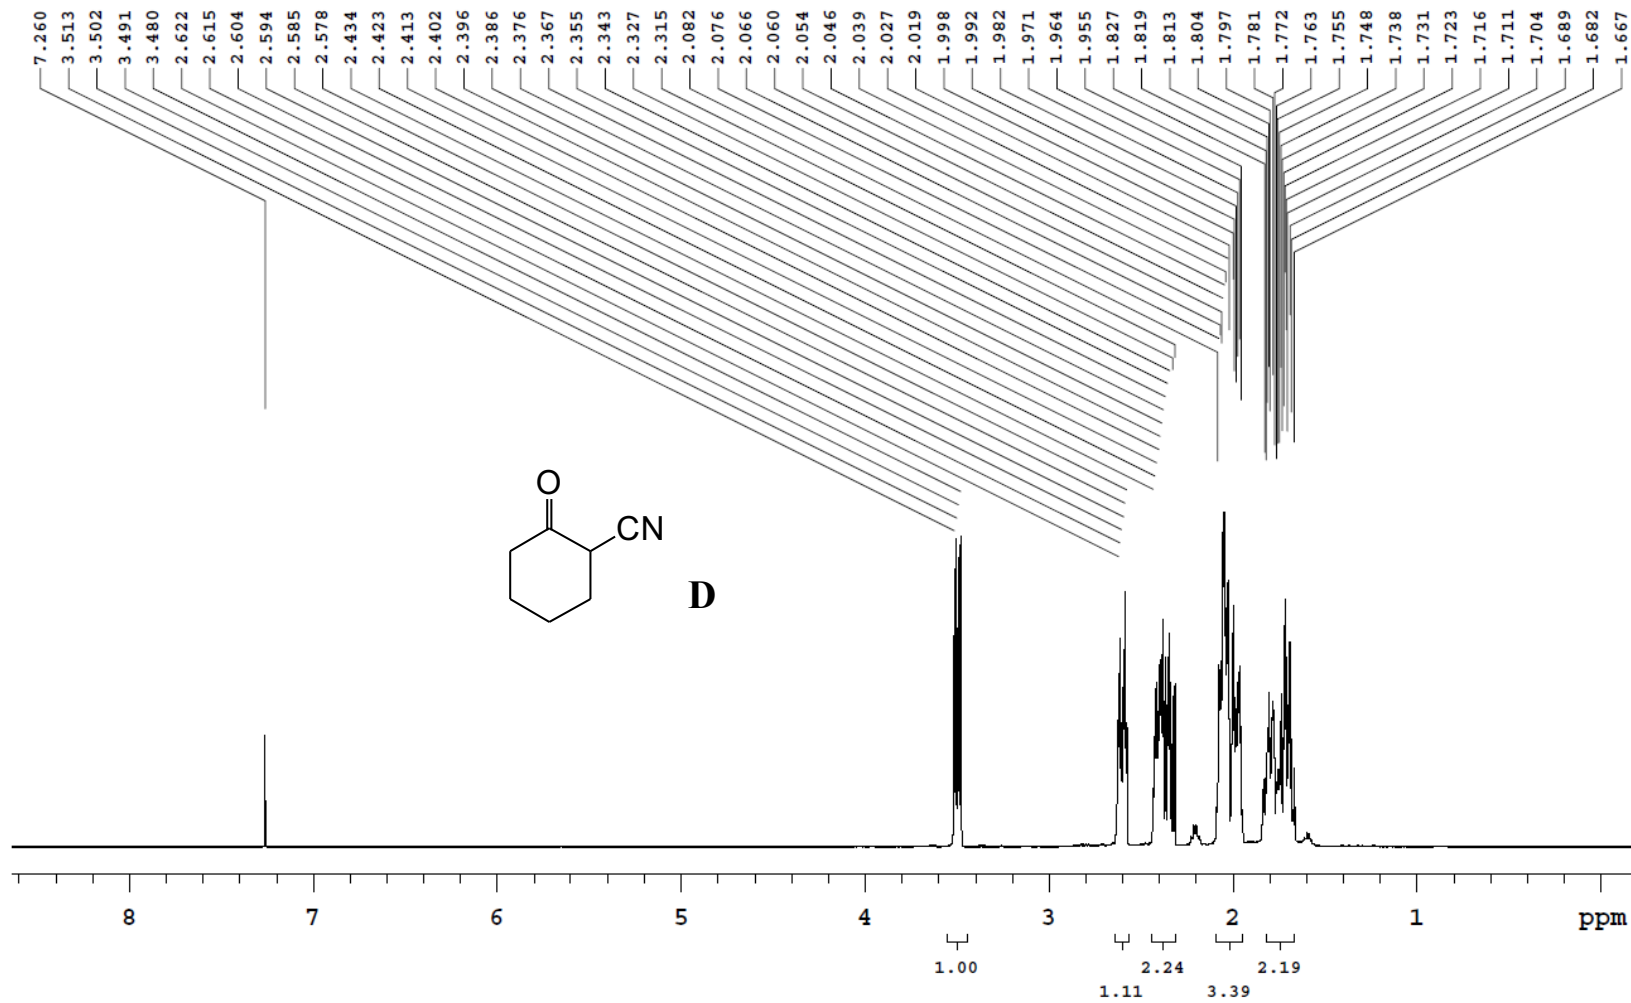

Baolei, BLW-I-144-a  
125.690 MHz C13[H1] APT\_ad in cdcl3 (ref. to CDCl3 @ 77.06 ppm), temp 27.7 C -> actual temp = 27.0 C, cold dual probe  
C & CH2 same, CH & CH3 opposite side of solvent signal

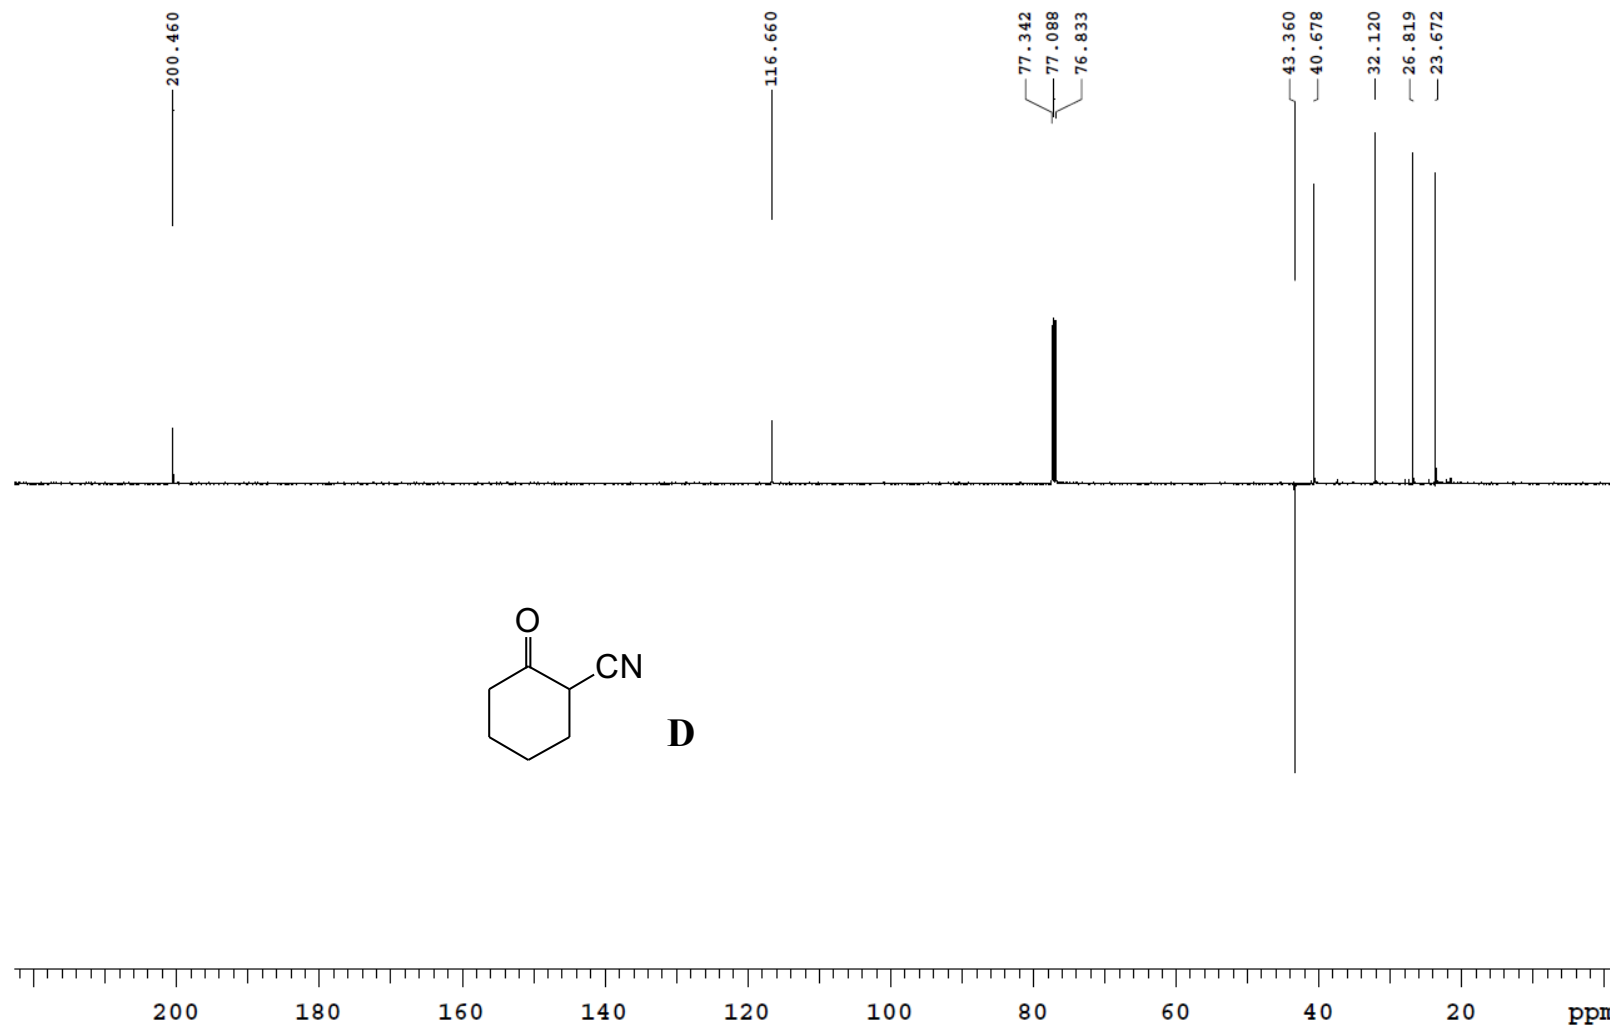



Baolei, BLW-I-145-1  
499.806 MHz H1 PRESAT in cdcl3 (ref. to CDCl3 @ 7.26 ppm), temp 27.7 C -> actual temp = 27.0 C, cold dual probe

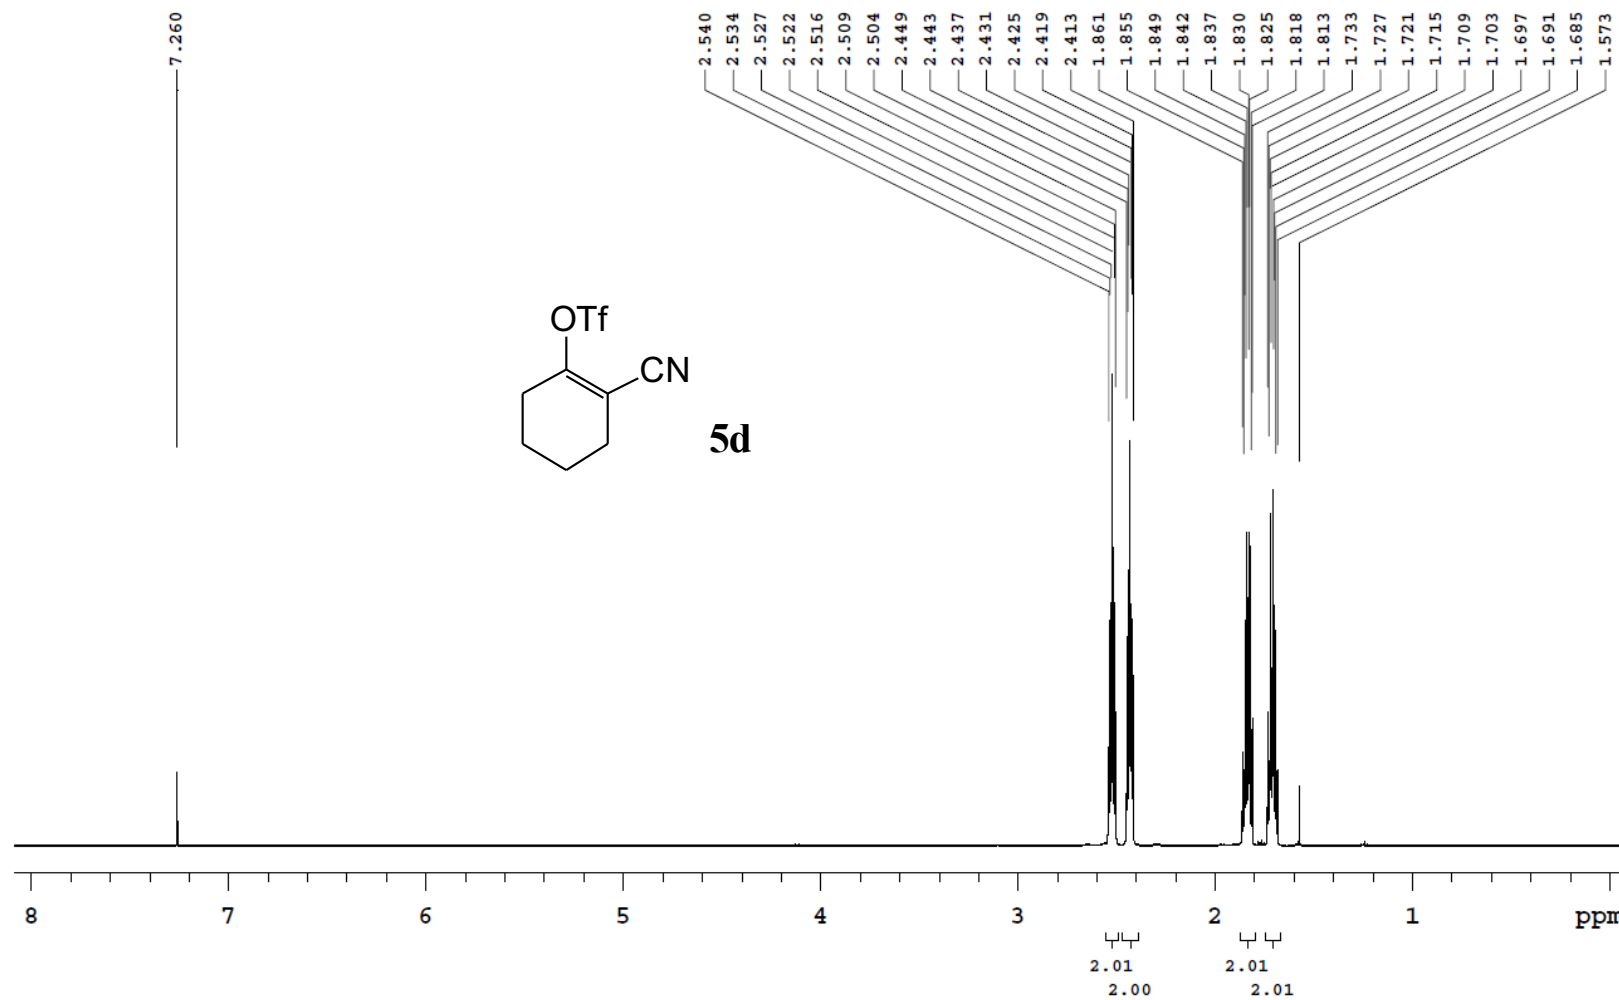

Baolei, BLW-I-145-1

125.690 MHz C13{H1} APT\_ad in cdcl3 (ref. to CDCl3 @ 77.06 ppm), temp 27.7 C -> actual temp = 27.0 C, cold dual probe  
C & CH2 same, CH & CH3 opposite side of solvent signal

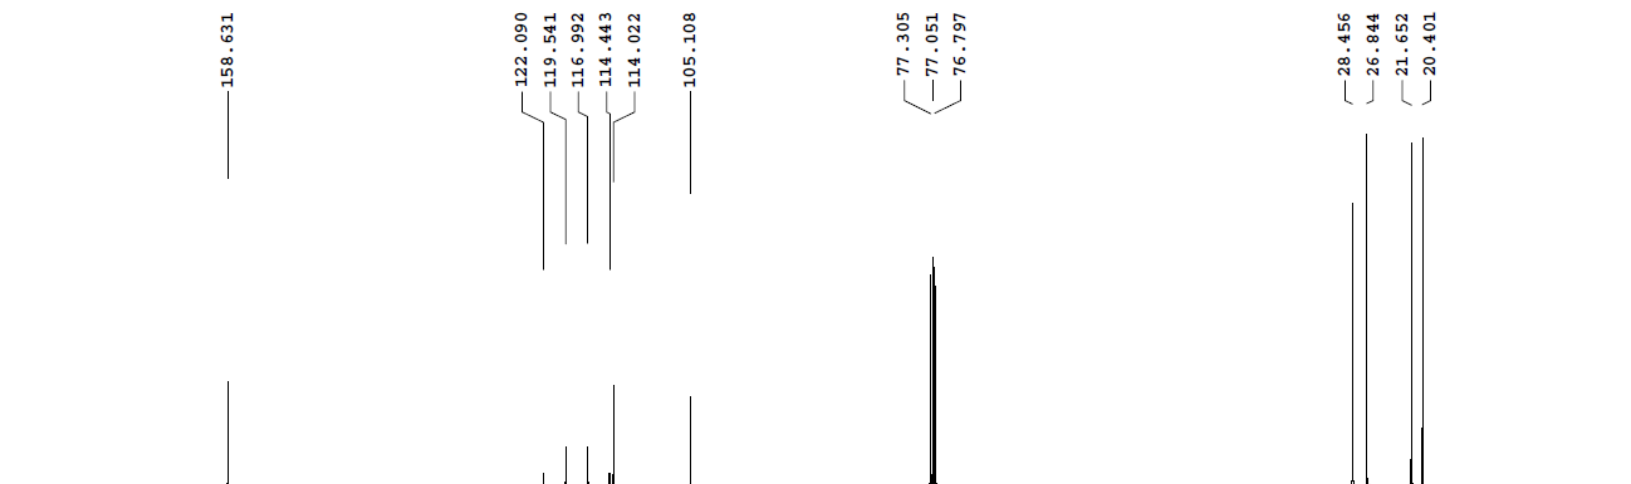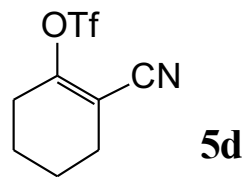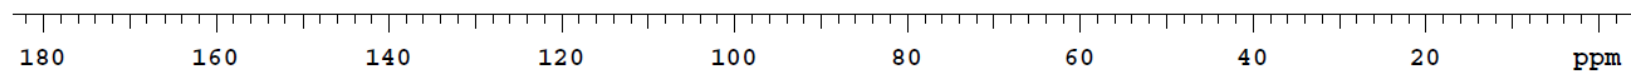

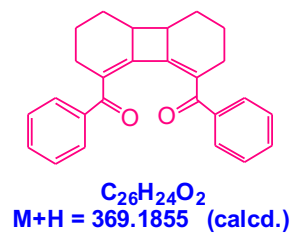

Mass spectrum (APPI) proof for the possible dimerization product of 1-benzoyl-1,2-cyclohexadiene **7a**, which was isolated as an impure mixture from column chromatography after stirring the precursor **5a** and KO<sup>t</sup>Bu in THF at room temperature for 3 h.

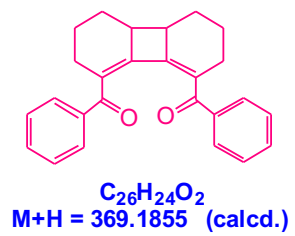

Mass spectrum (APPI) proof for the possible dimerization product of 1-benzoyl-1,2-cyclohexadiene **7a**, which was isolated as an impure mixture from column chromatography after stirring the precursor **5a** and KO<sup>t</sup>Bu in THF at room temperature over night.

Baolei, BLW-I-61-3  
499.806 MHz H1 PRESAT in cdcl3 (ref. to CDCl3 @ 7.26 ppm), temp 27.7 C -> actual temp = 27.0 C, cold dual probe

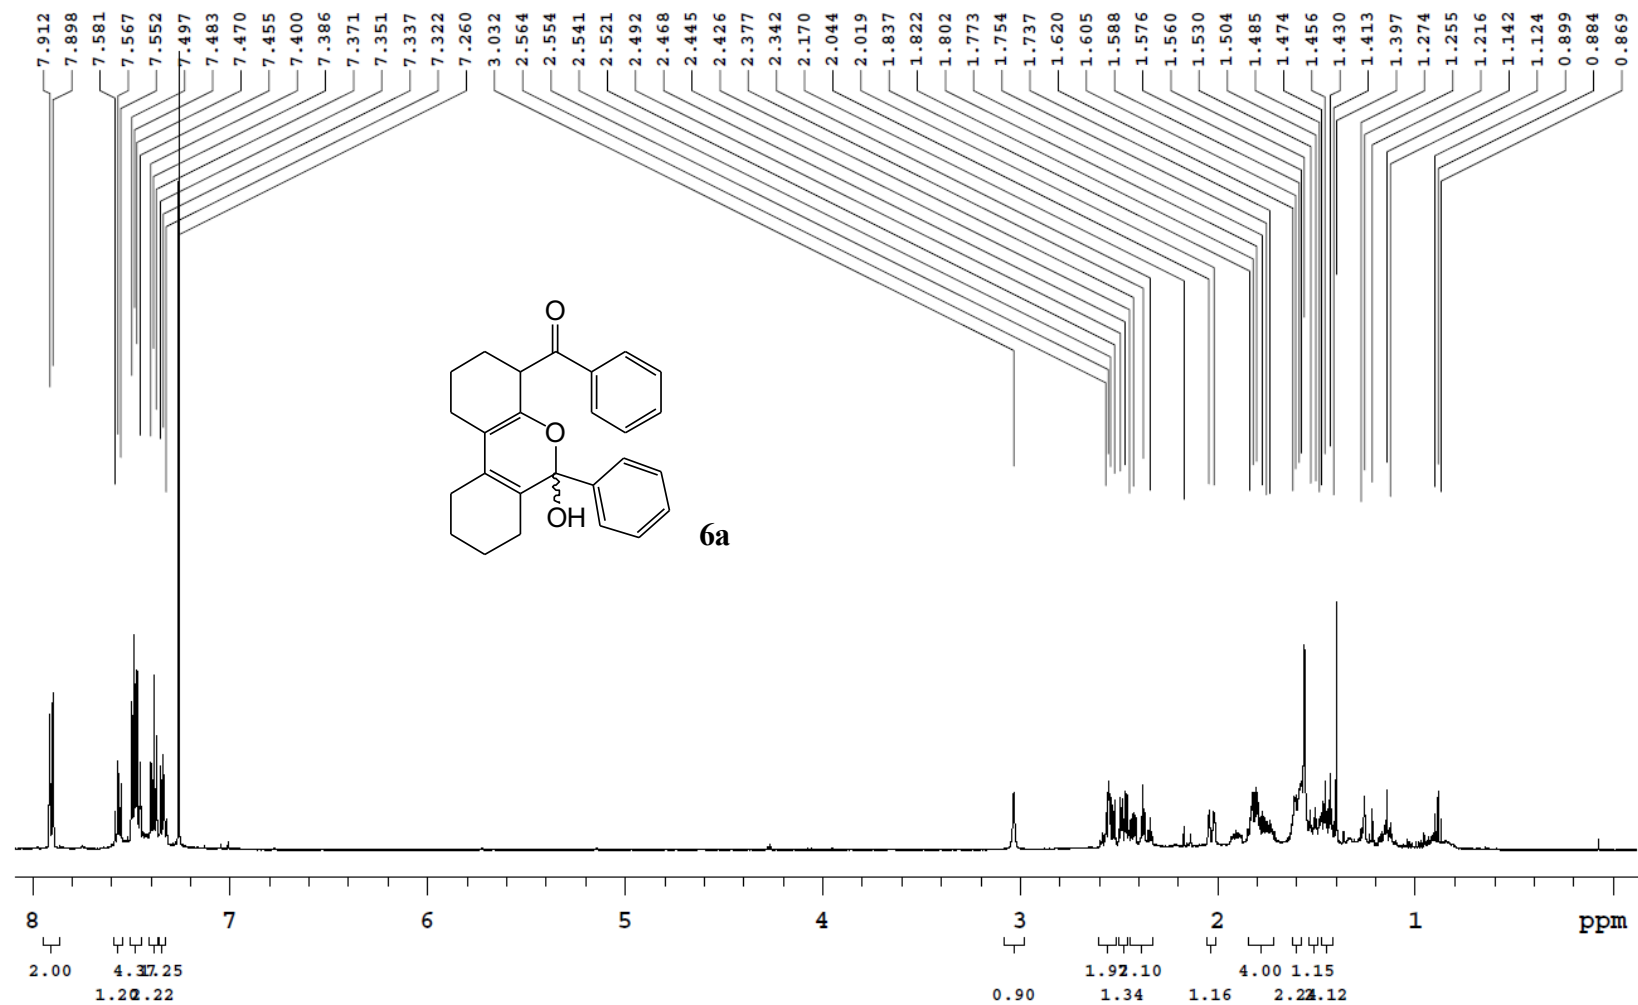

Baolei, BLW-I-37-1  
125.690 MHz C13[H1] APT\_ad in cdcl3 (ref. to CDCI3 @ 77.06 ppm), temp 27.7 C -> actual temp = 27.0 C, cold dual probe  
C & CH2 same, CH & CH3 opposite side of solvent signal

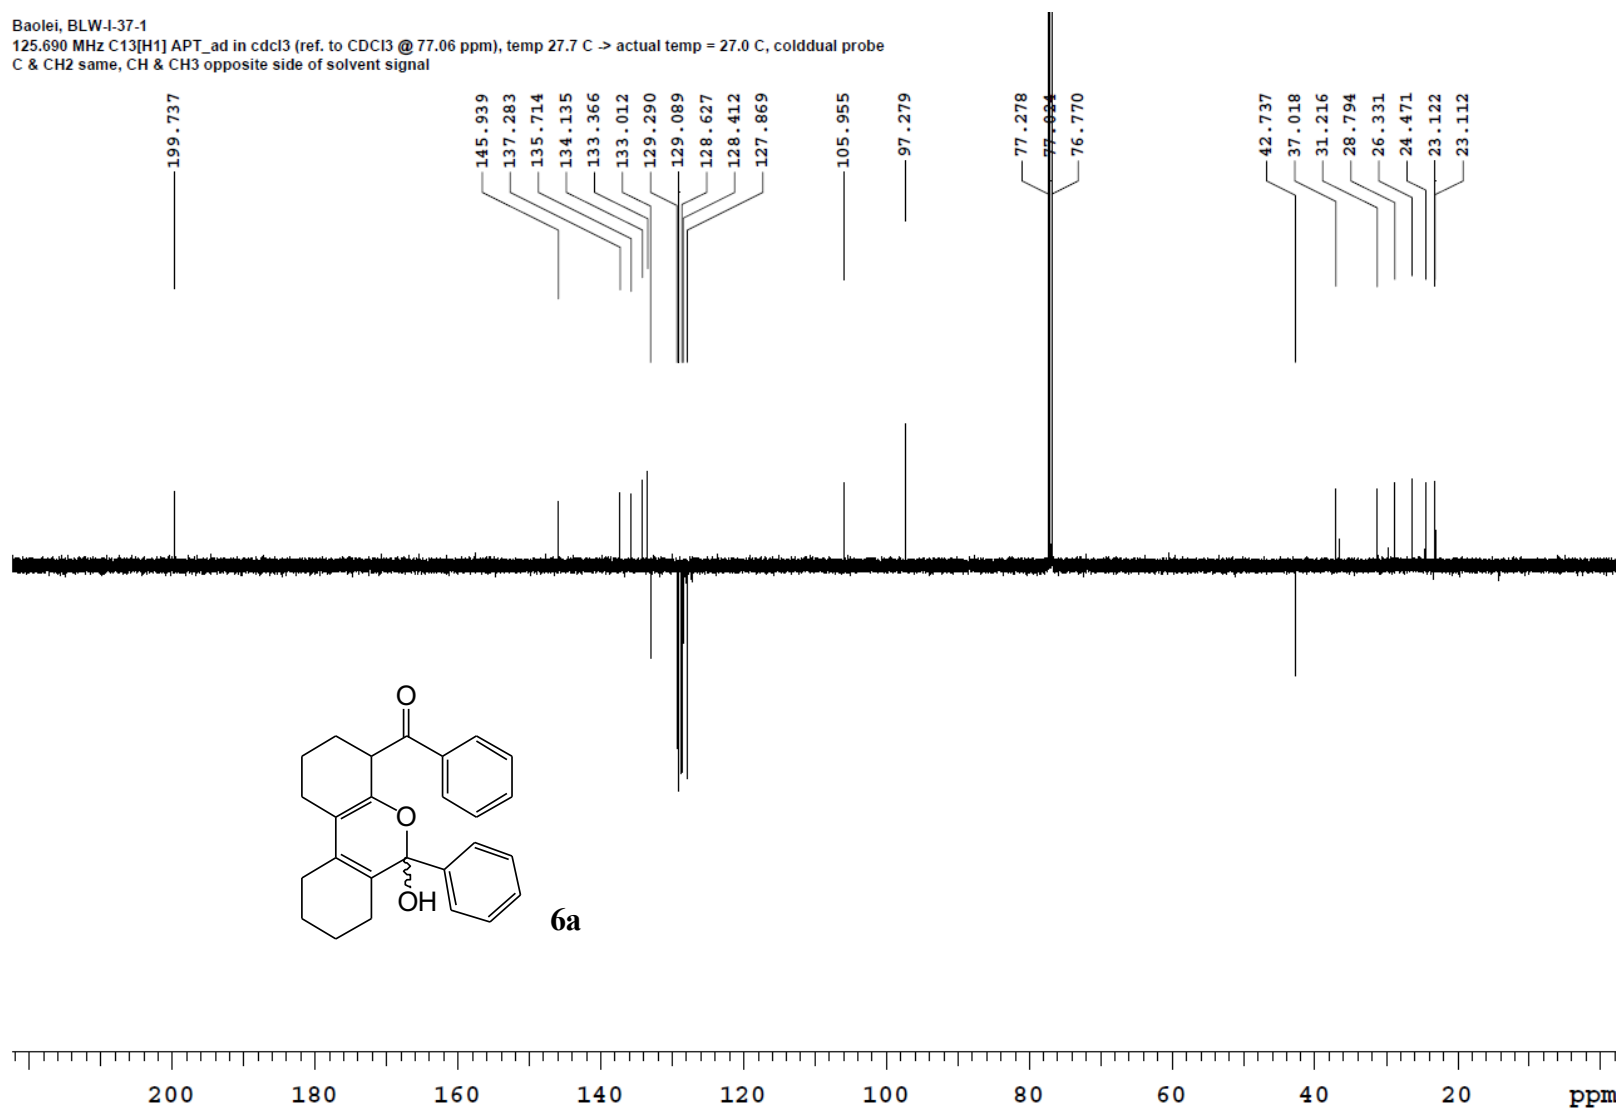

Baolei, BLW-I-61-3  
499.806 MHz H1 gHMBCAD in cdcl3 (ref. to CDCl3 @ 7.26 ppm), temp 27.7 C -> actual temp = 27.0 C, cold dual probe

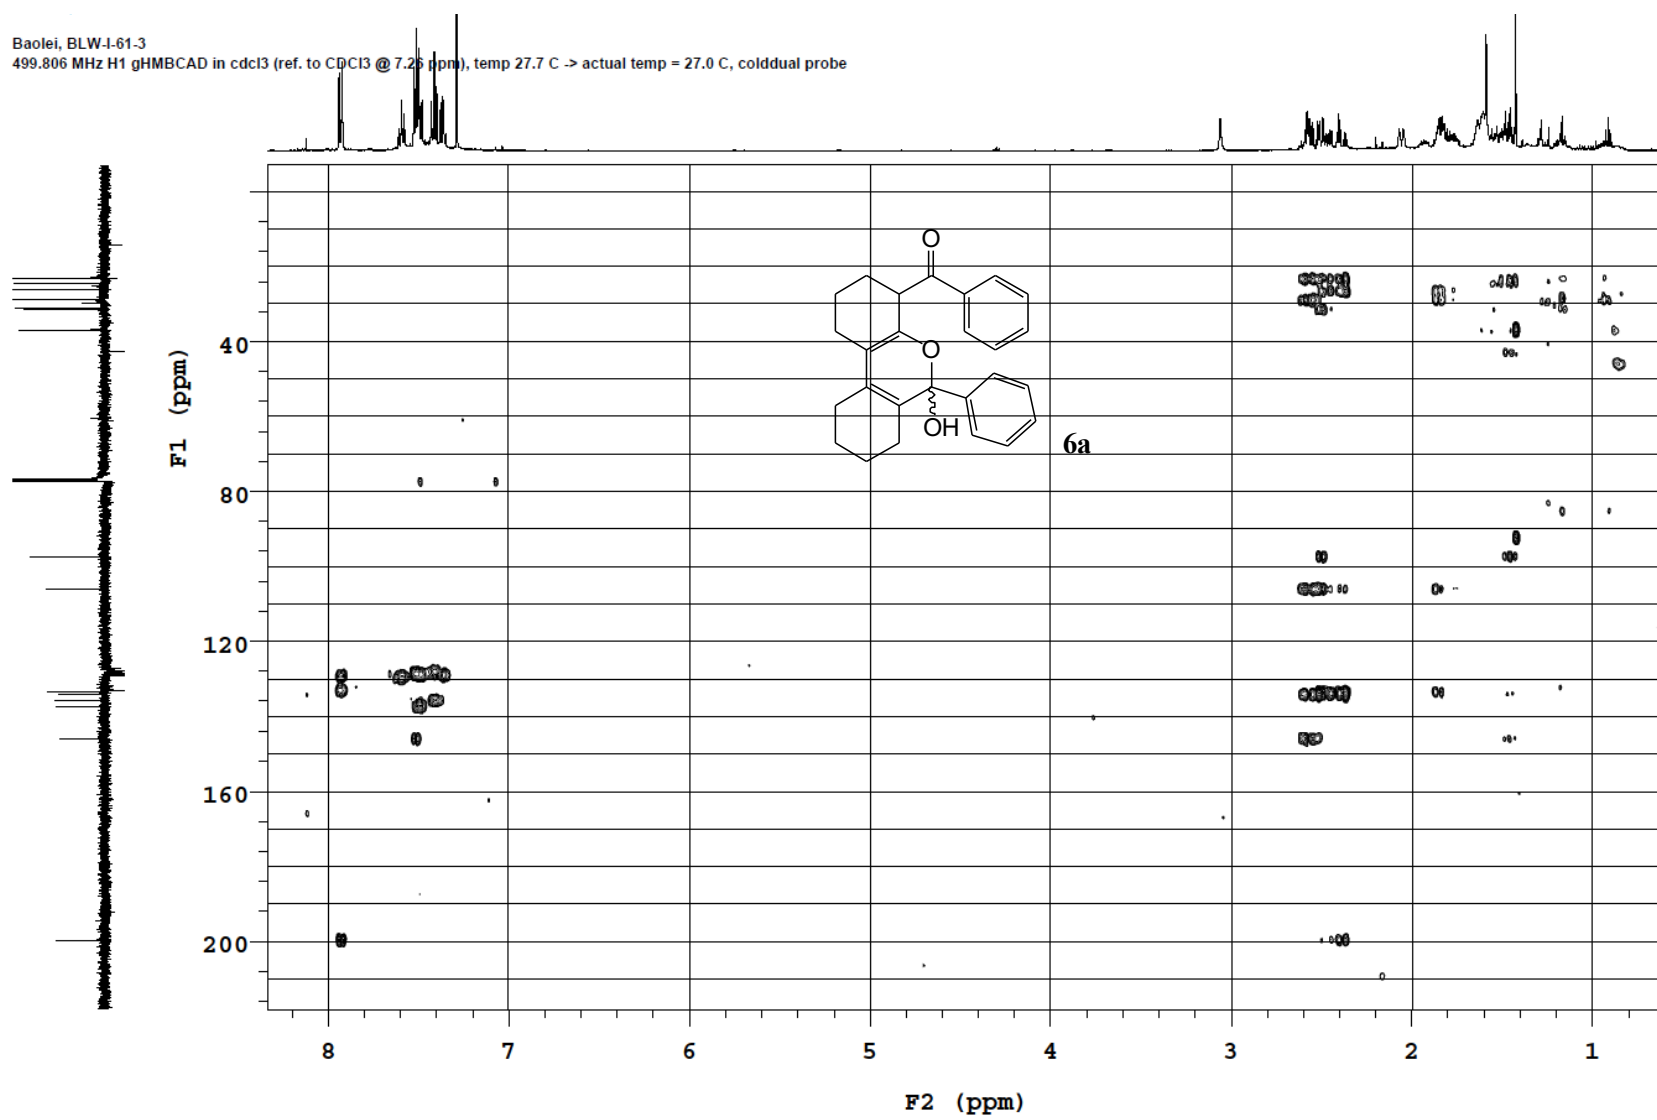

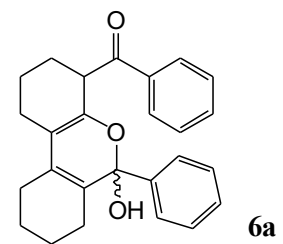



Baolei, BLW-131A-2  
499.806 MHz H1 PRESAT in cdcl3 (ref. to CDCl3 @ 7.26 ppm), temp 27.7 C -> actual temp = 27.0 C, cold dual probe

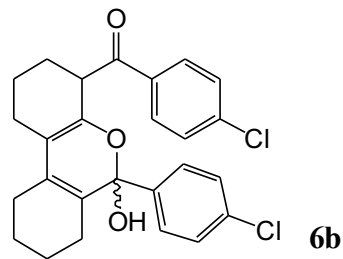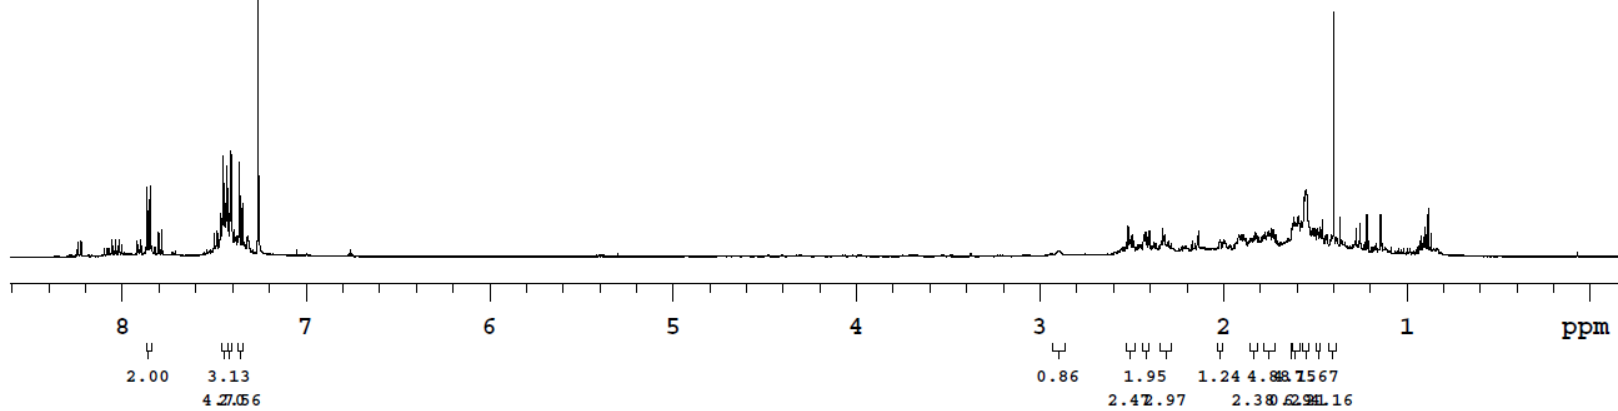

Baolei, BLW-I-131A-2  
125.690 MHz C13[H1] APT\_ad in cdcl3 (ref. to CDCl3 @ 77.06 ppm), temp 27.7 C -> actual temp = 27.0 C, coldddal probe  
C & CH2 same, CH & CH3 opposite side of solvent signal

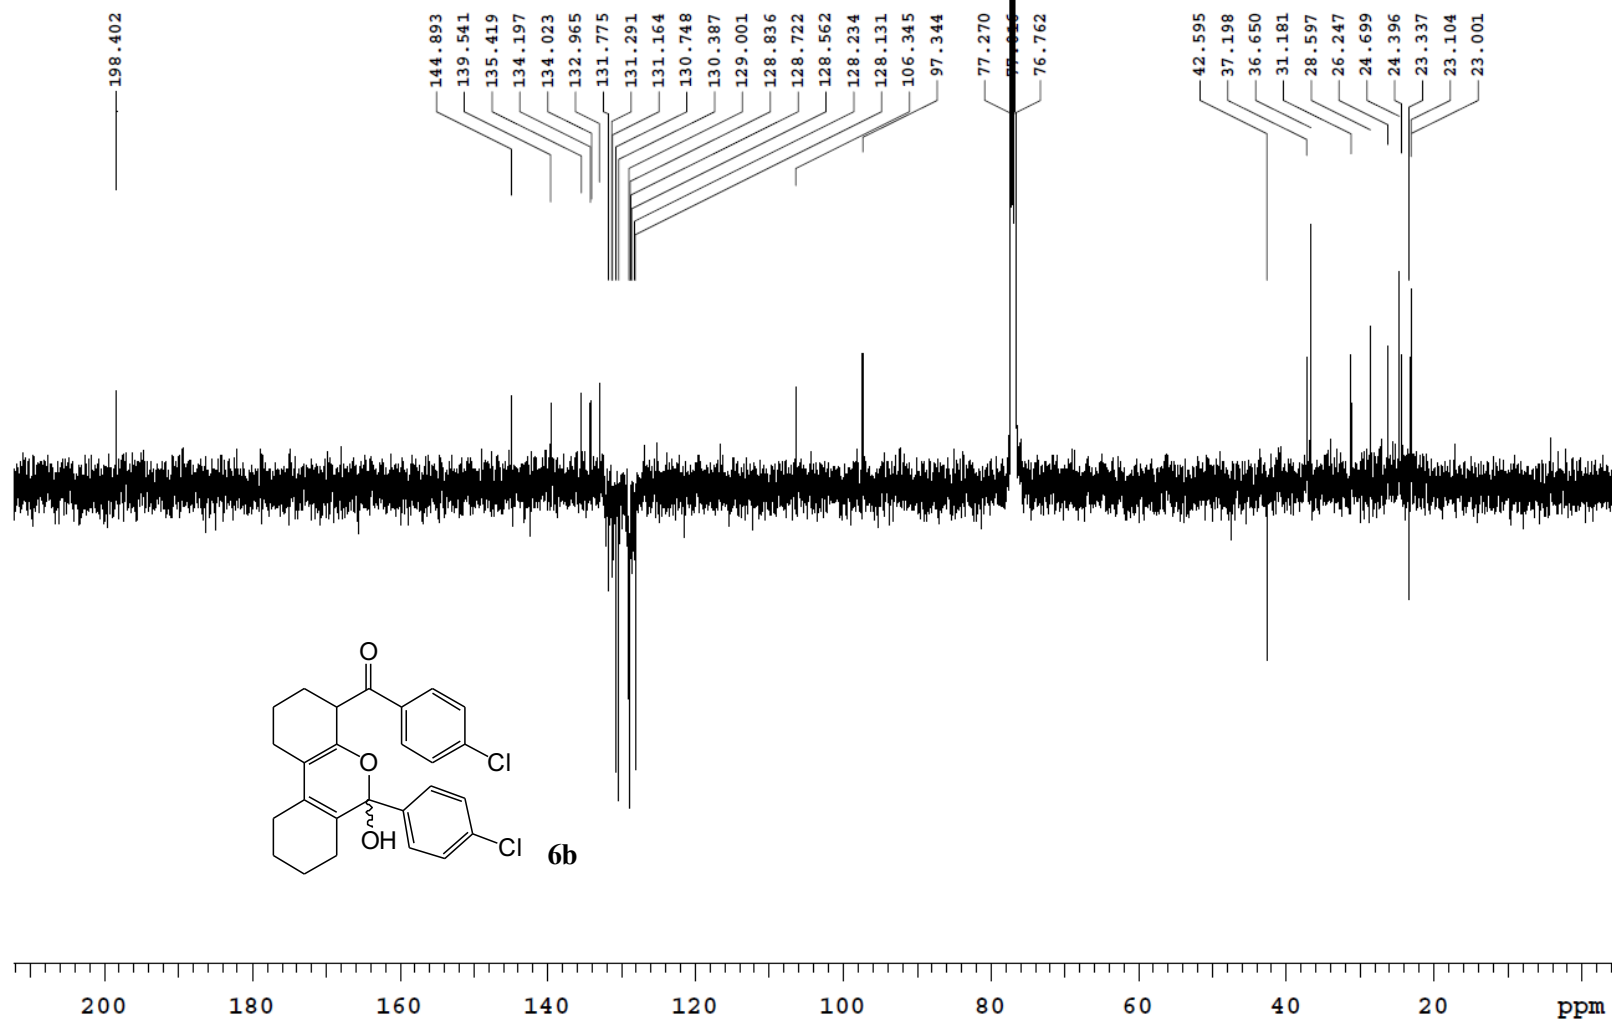

Baolei, BLW-I-131A-2  
499.806 MHz H1 gHMBCAD in cdcl3 (ref. to CDCl3 @ 7.26 ppm), temp 27.7 C -> actual temp = 27.0 C, cold dual probe

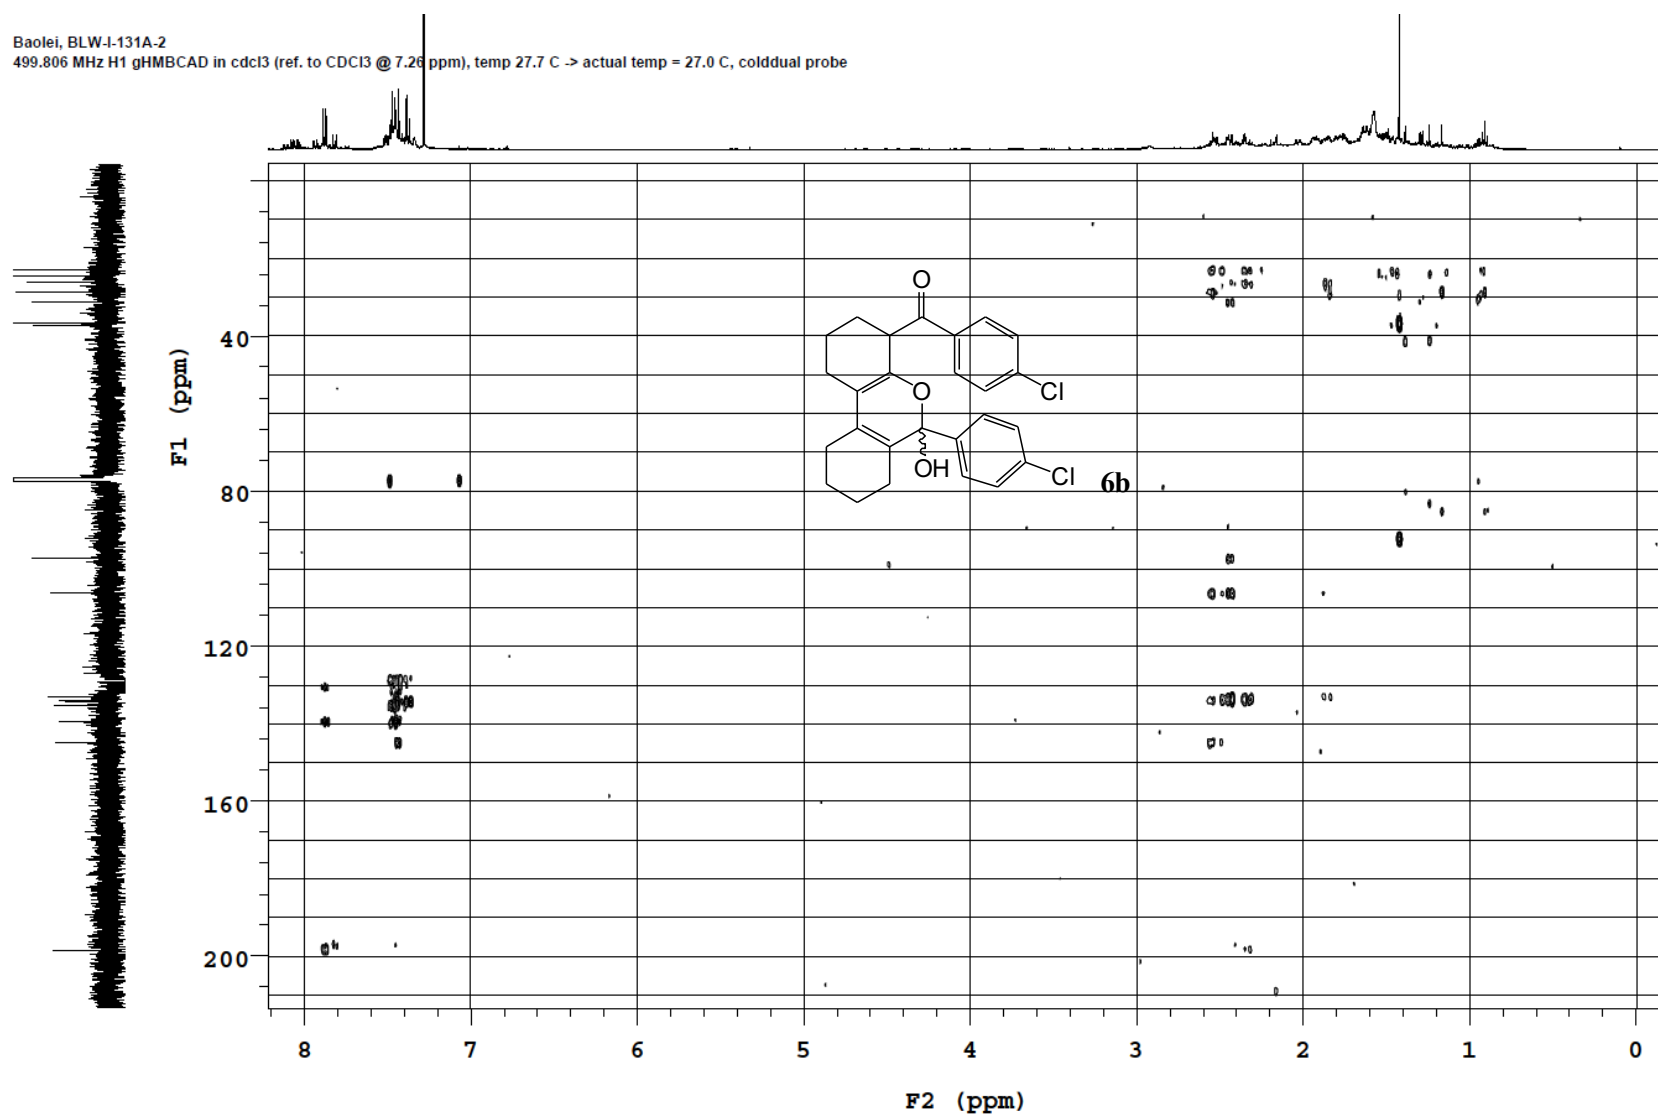

File Name : c:\mswin\data\2016\may16\051304a.mss  
Creation Date/Time : 13/05/16 at 10:12:22  
File Type : Hi-Res Mass Spectrum  
File Source : Acquired on MASPEC system [msw/9849]  
as c:\mswin\data\2016\may16\051304.mss  
File Title : B. Wang, BLW-I-131A-2, F. West  
Source File : c:\mswin\data\2016\may16\051304.mss  
Source Scan(s) : 9:18

SCAN GRAPH. Flagging=M/z. Filter=[Excl: Ref/Ex.].  
Entries=382. 100% Int.=1172542.

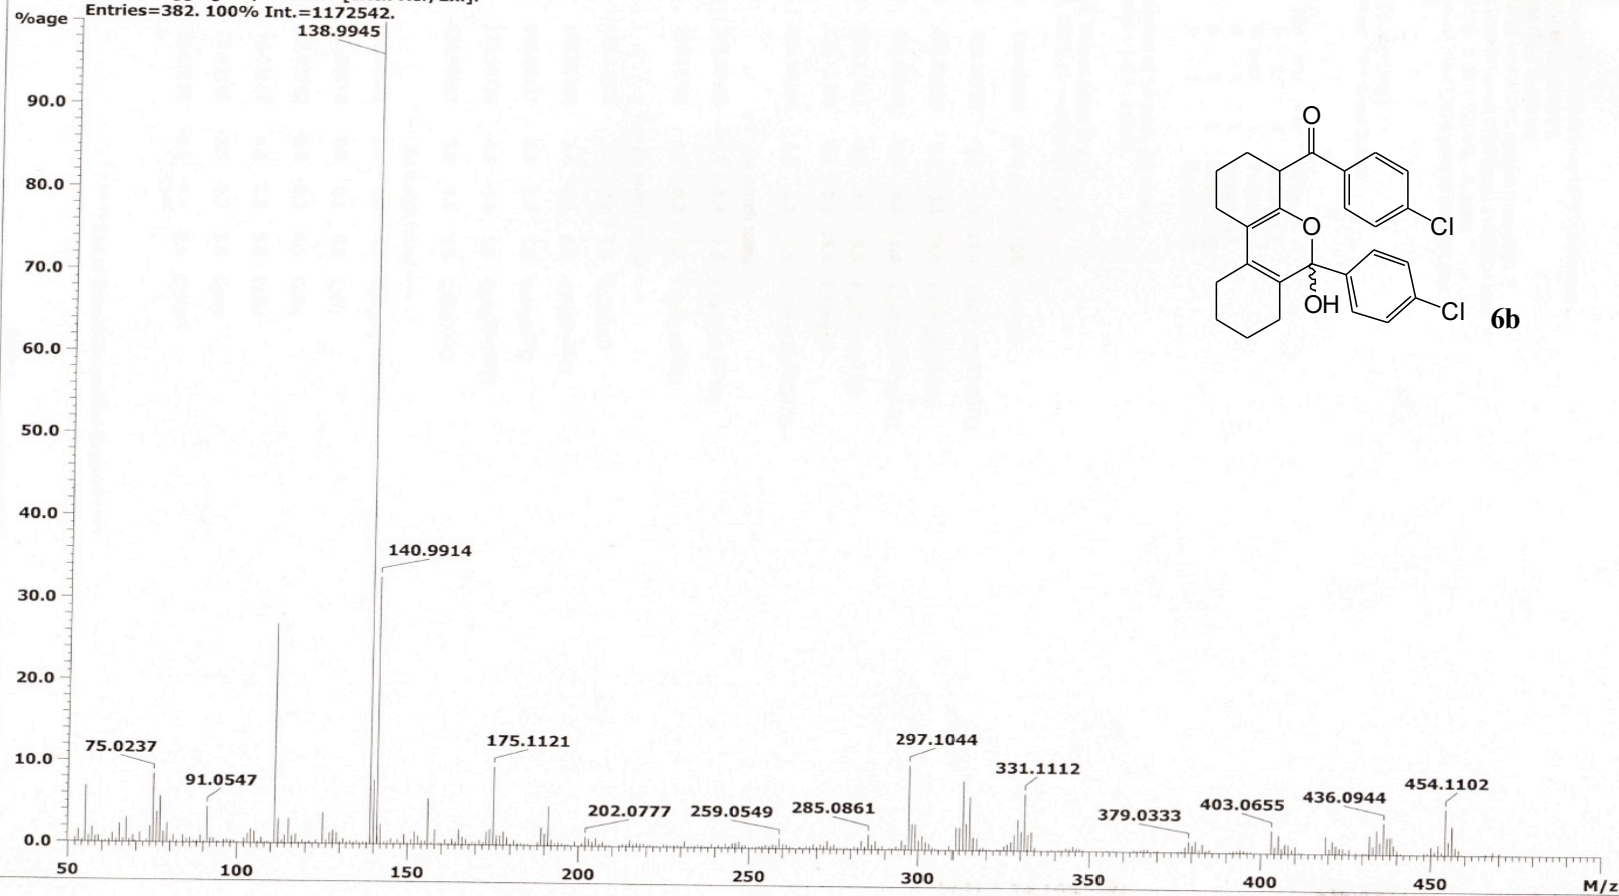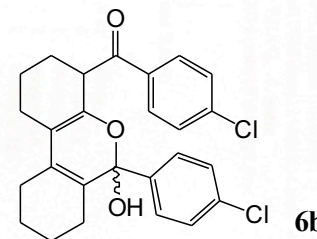

Baolei, BLW-I-69-1

499.806 MHz H1 PRESAT in cdcl3 (ref. to CDCl3 @ 7.26 ppm), temp 27.7 C -> actual temp = 27.0 C, colddual probe

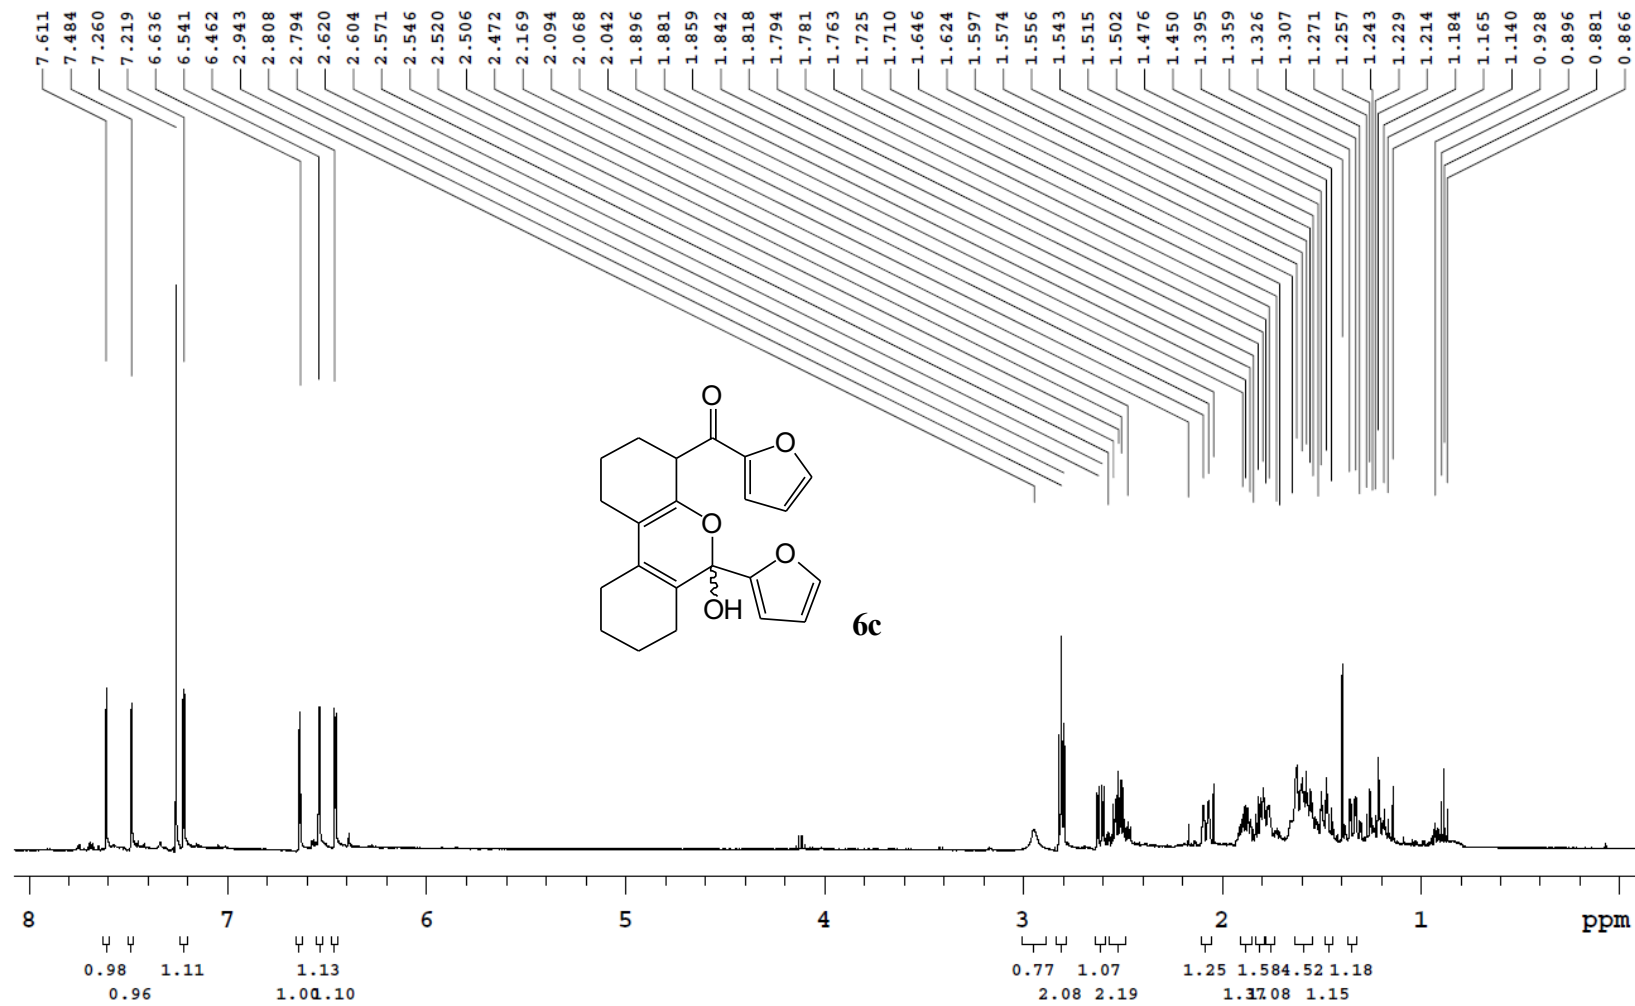

Baolei, BLW-I-69-1  
125.690 MHz C13[H1] APT\_ad in cdcl3 (ref. to CDC13 @ 77.06 ppm), temp 27.7 C -> actual temp = 27.0 C, cold dual probe  
C & CH2 same, CH & CH3 opposite side of solvent signal

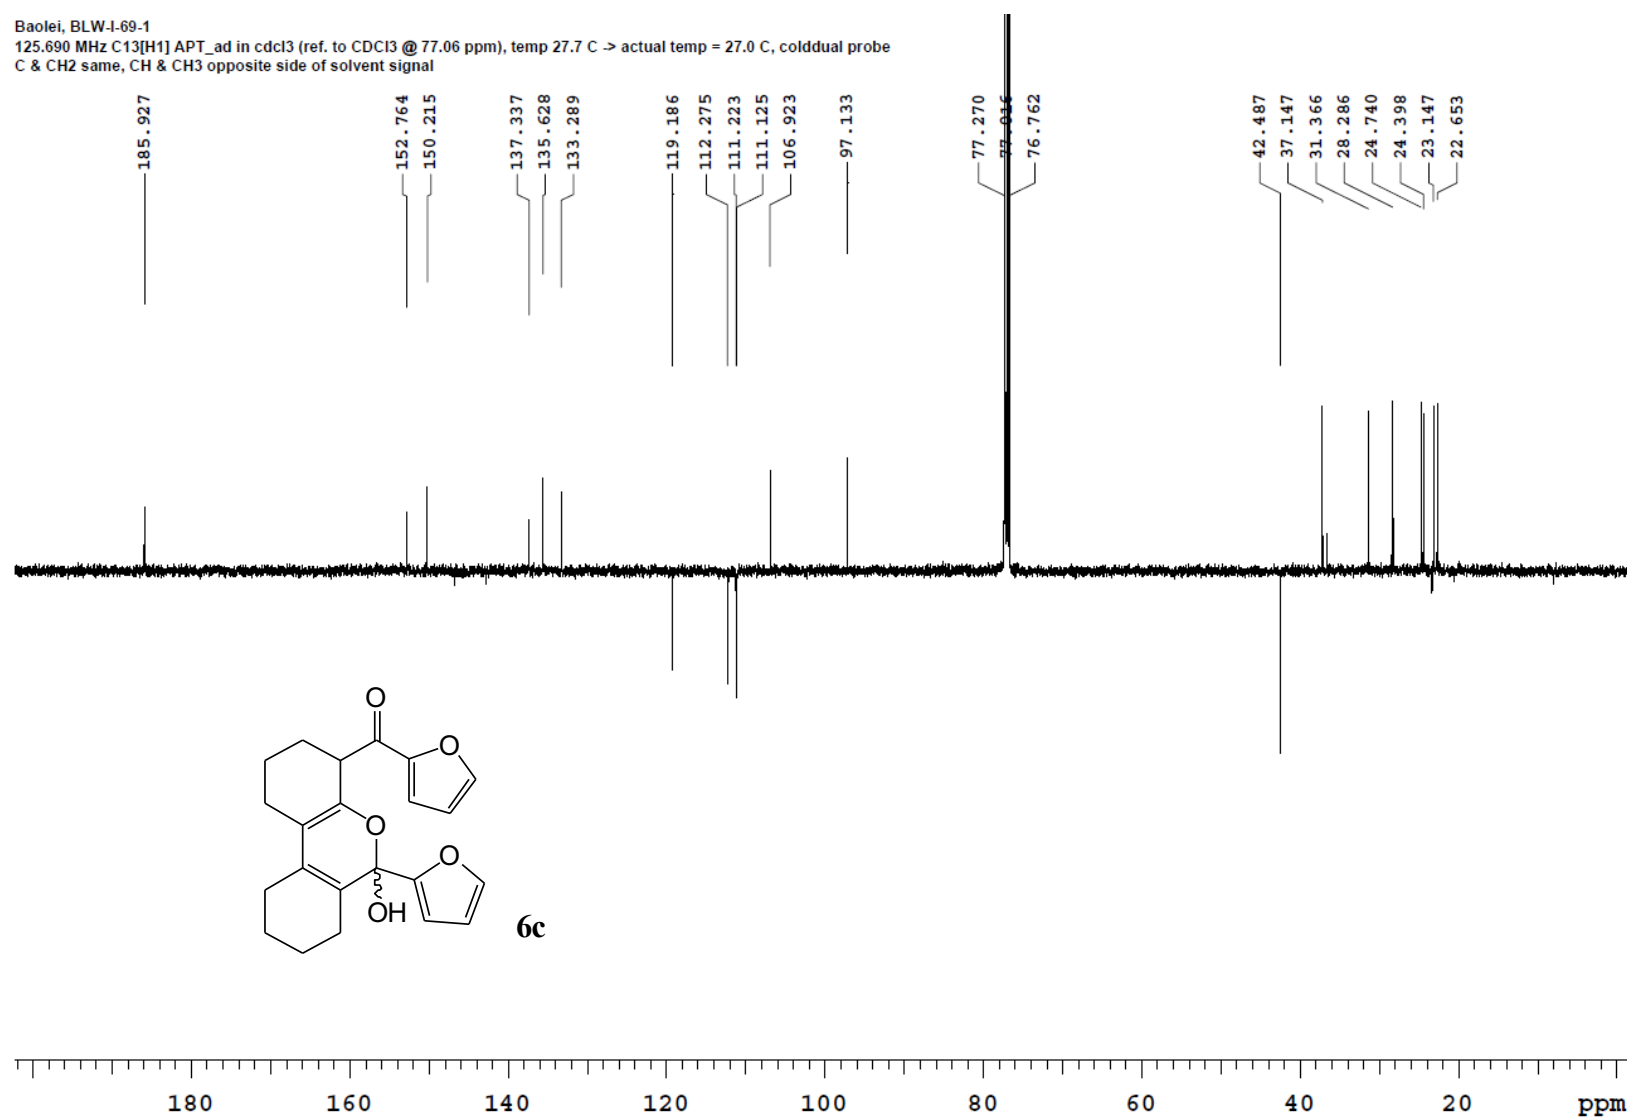

Baolei, BLW-I-77-1\_2  
499.806 MHz H1 gHMBCAD in cdcl3 (ref. to CDCl3 @ 7.26 ppm), temp 27.1 C -> actual temp = 27.0 C, cold dual probe

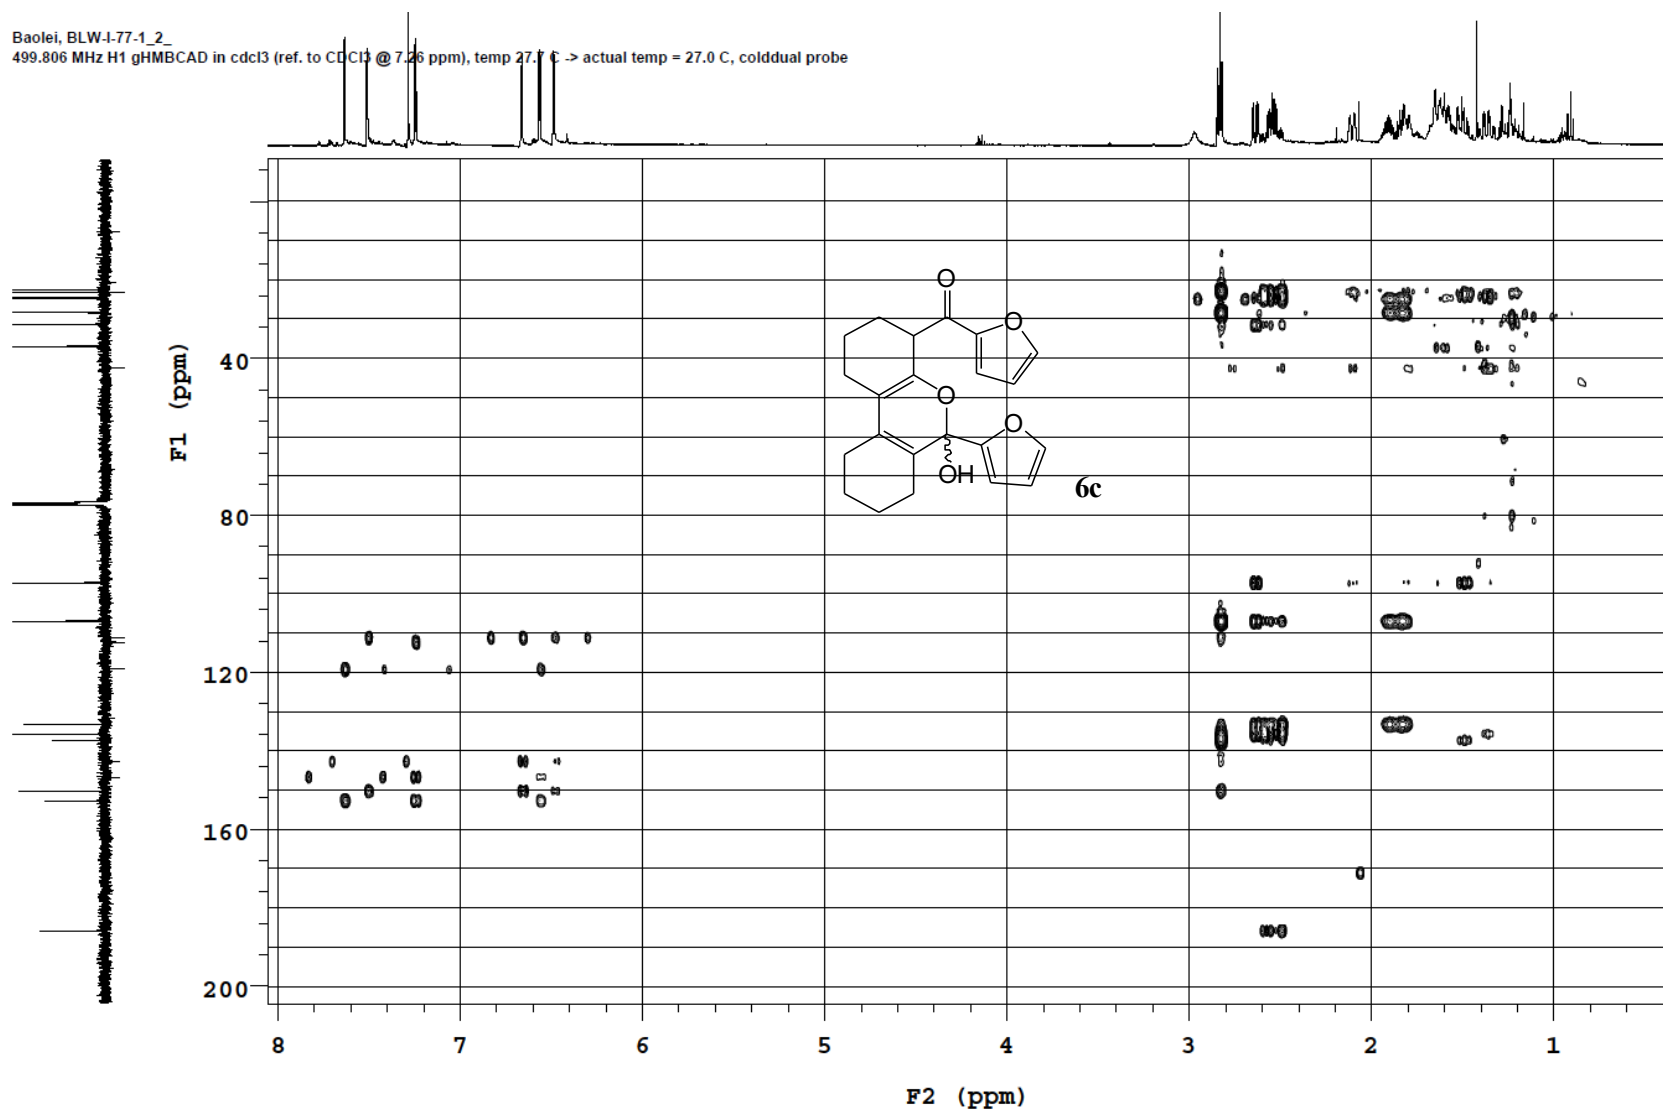

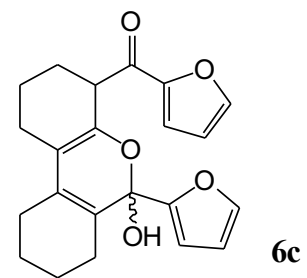



Baolei, BLW-I-101-1  
499.806 MHz H1 PRESAT in cdcl3 (ref. to CDCl3 @ 7.26 ppm), temp 27.7 C -> actual temp = 27.0 C, cold dual probe

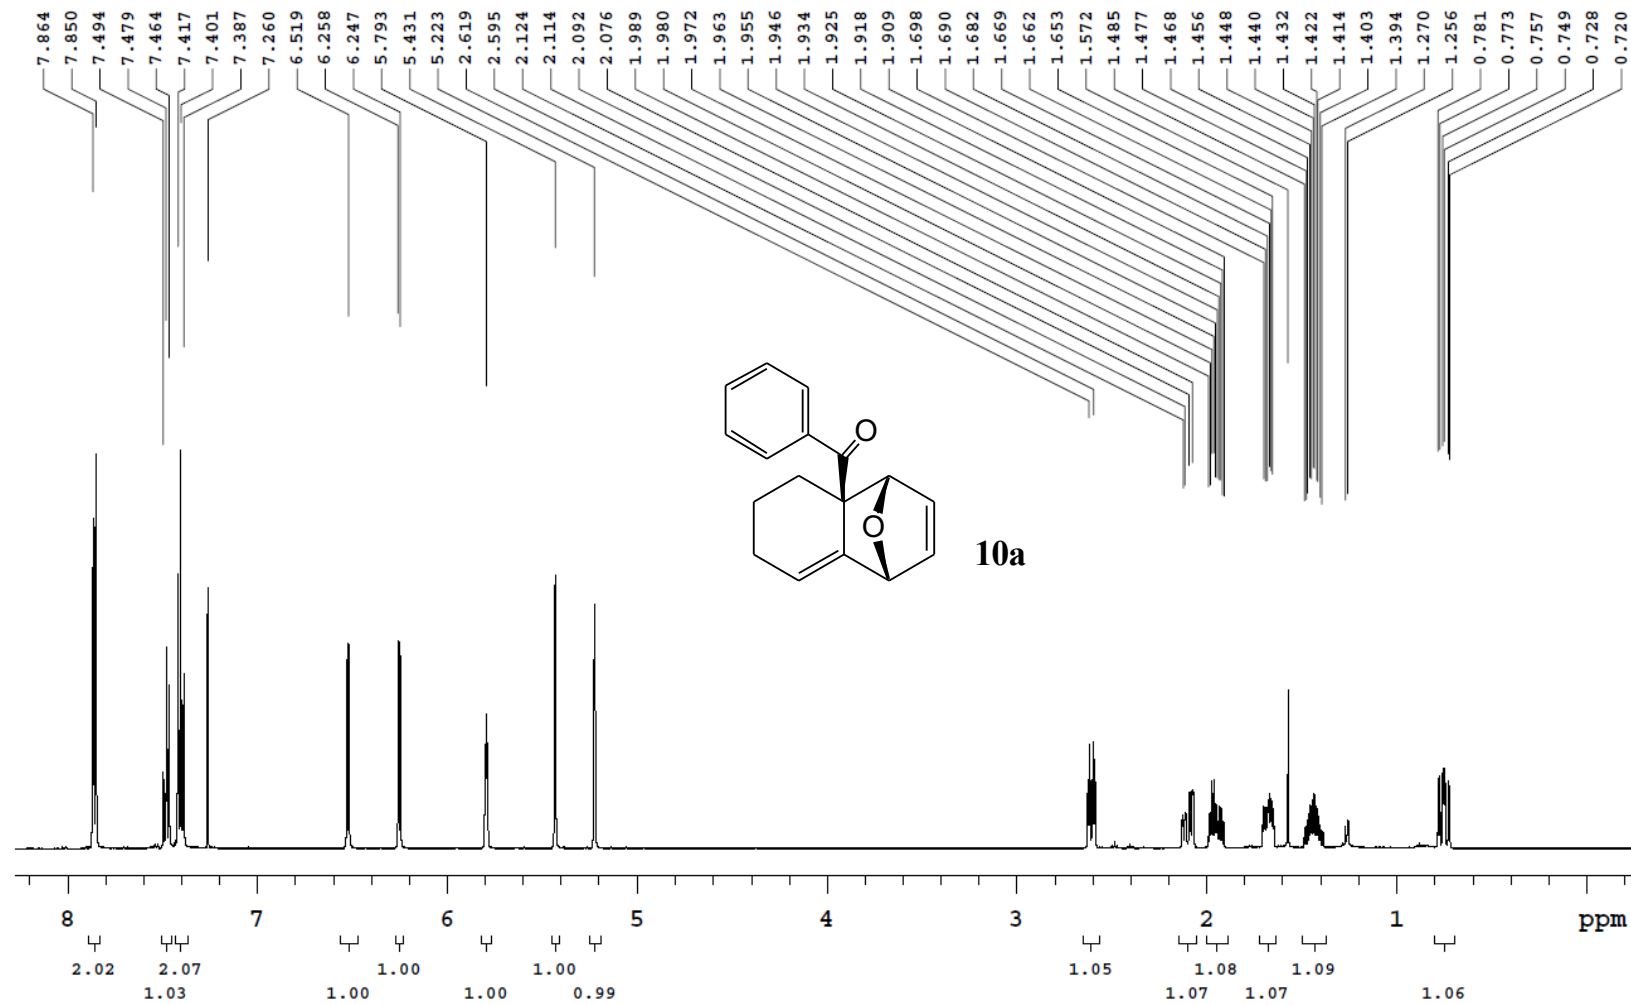

Baolei, BLW-I-101-1  
125.690 MHz C13[H1] APT\_ad in cdcl3 (ref. to CDC13 @ 77.06 ppm), temp 27.7 C -> actual temp = 27.0 C, cold dual probe  
C & CH2 same, CH & CH3 opposite side of solvent signal

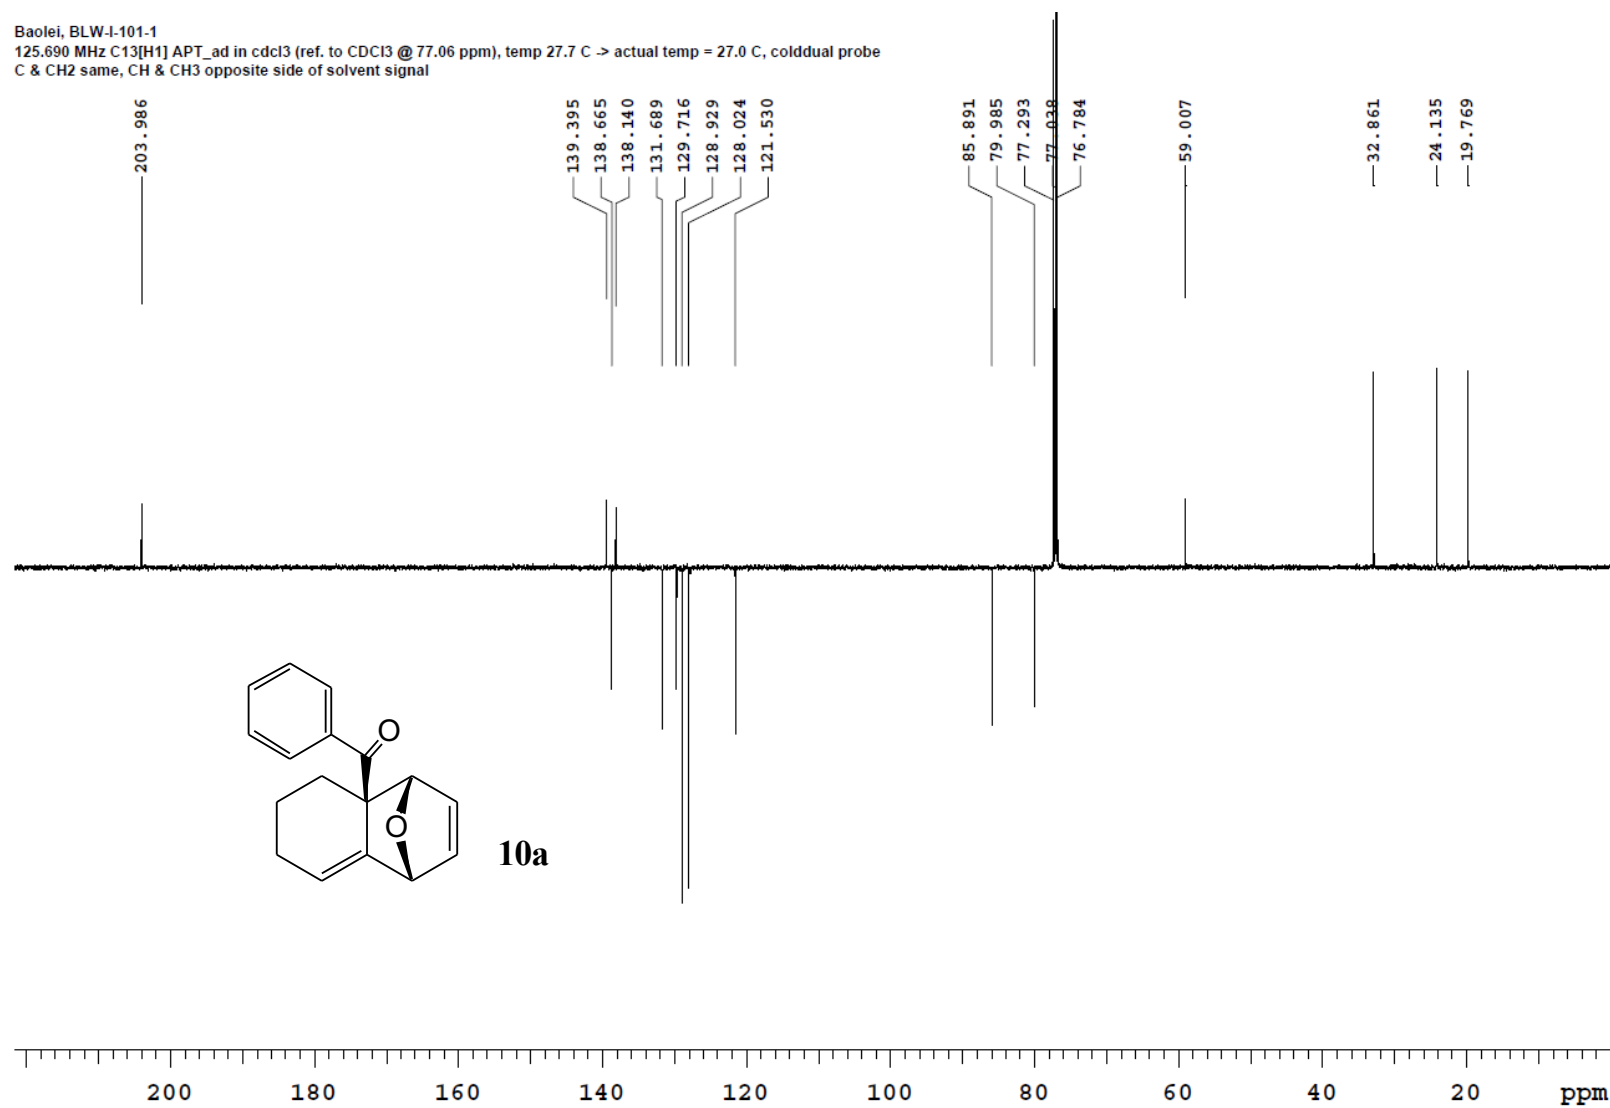

Baolei, BLW-I-104-1\_2  
499.806 MHz H1 ROESY in cdcl3 (ref. to CDCl3 @ 7.26 ppm), temp 27.7 C -> actual temp = 27.0 C, cold dual probe

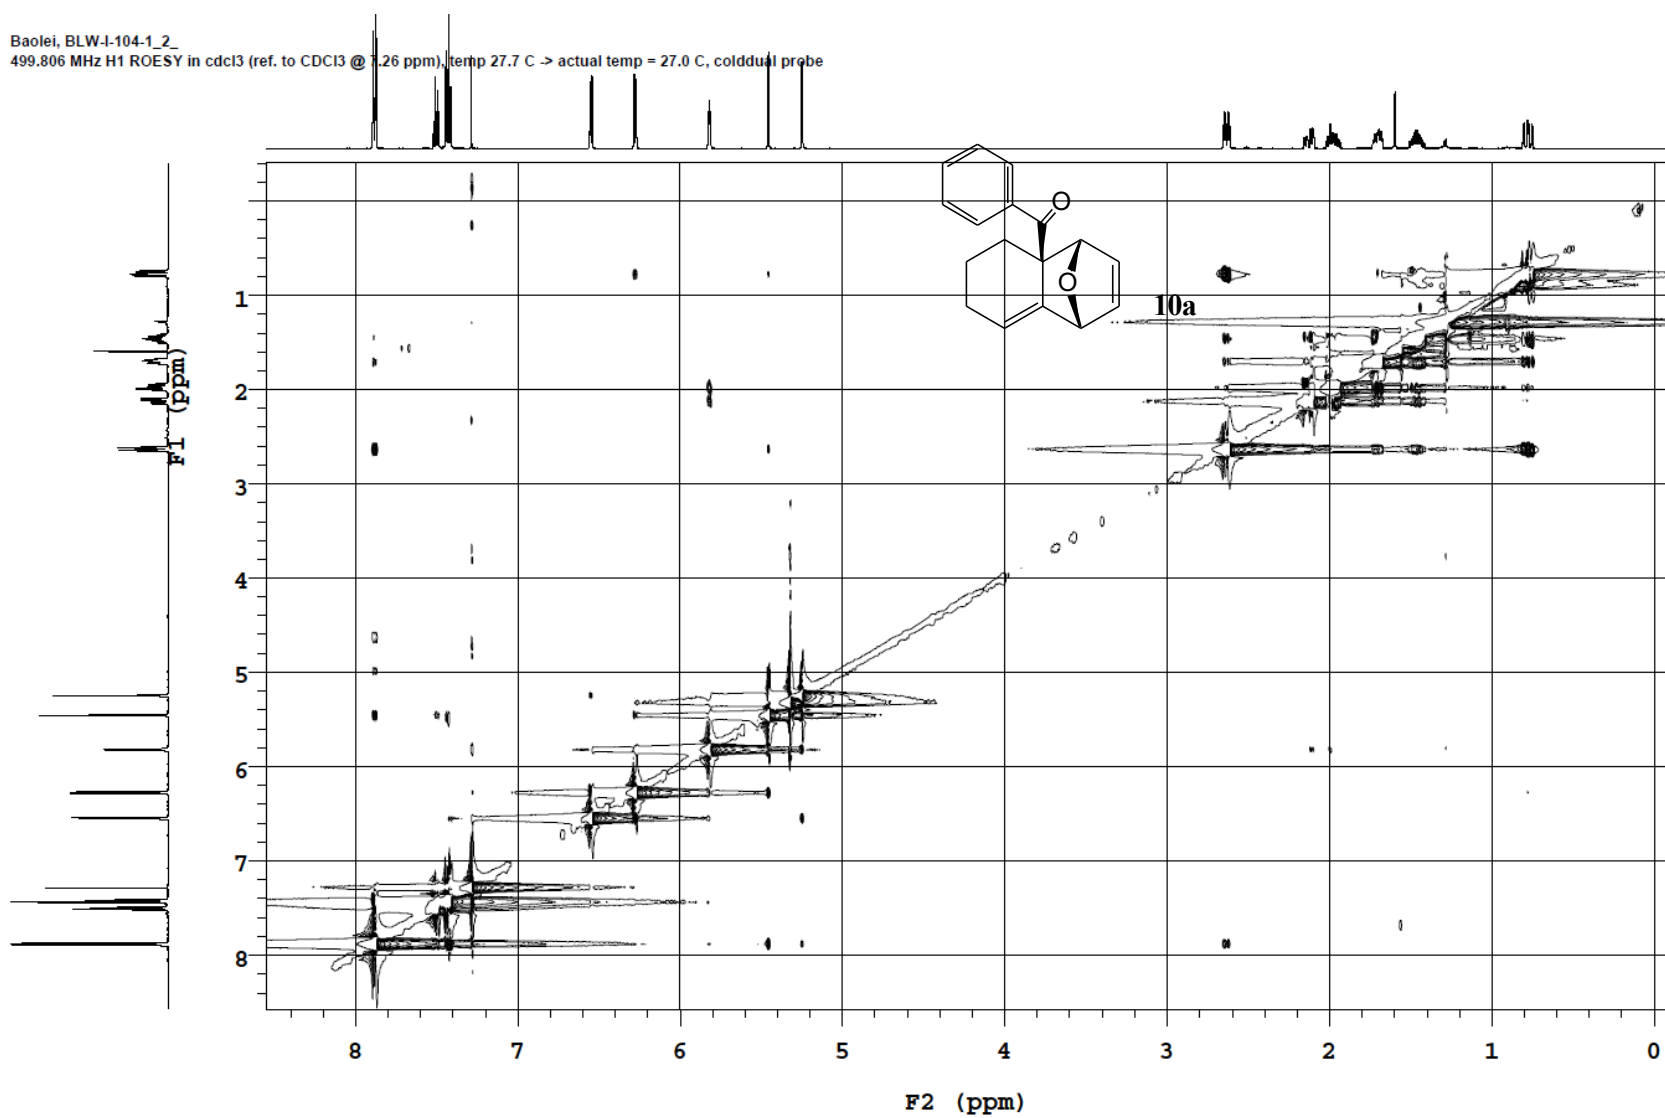

Baolei, BLW-I-115B-1  
499.806 MHz H1 PRESAT in cdcl3 (ref. to CDCl3 @ 7.26 ppm), temp 27.7 C -> actual temp = 27.0 C, cold dual probe

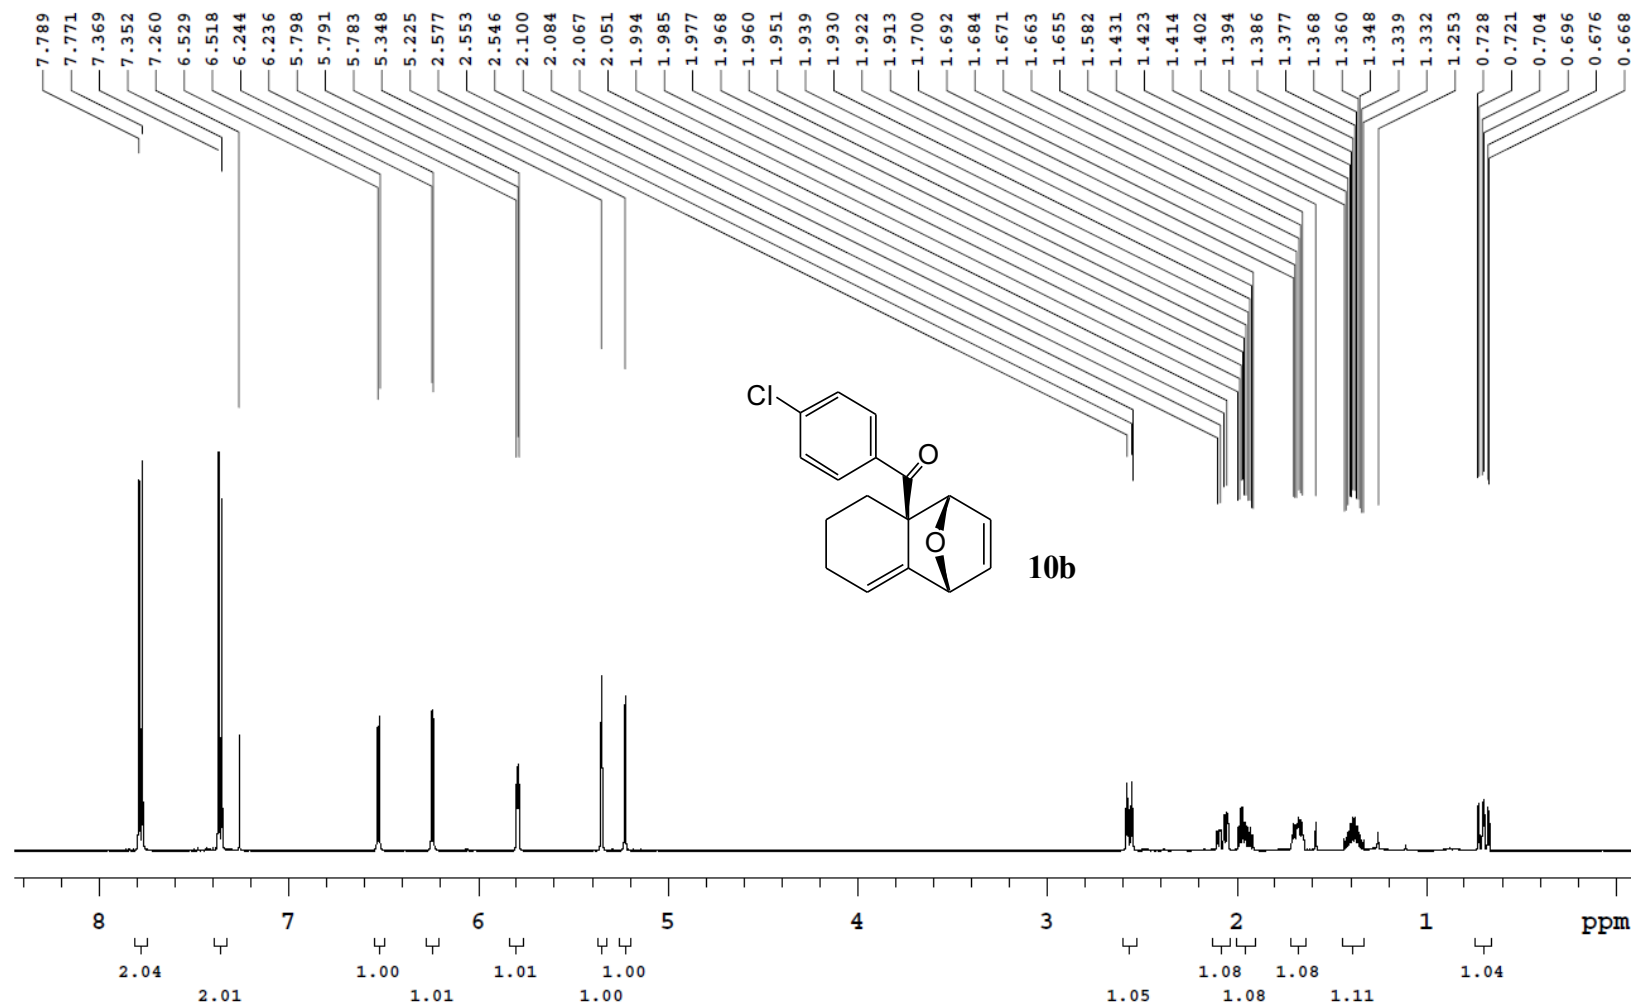

Baolei, BLW-I-115B-1  
125.690 MHz C13[H1]APT\_ad in cdcl3 (ref. to CDCl3 @ 77.06 ppm), temp 27.7 C -> actual temp = 27.0 C, cold dual probe  
C & CH2 same, CH & CH3 opposite side of solvent signal

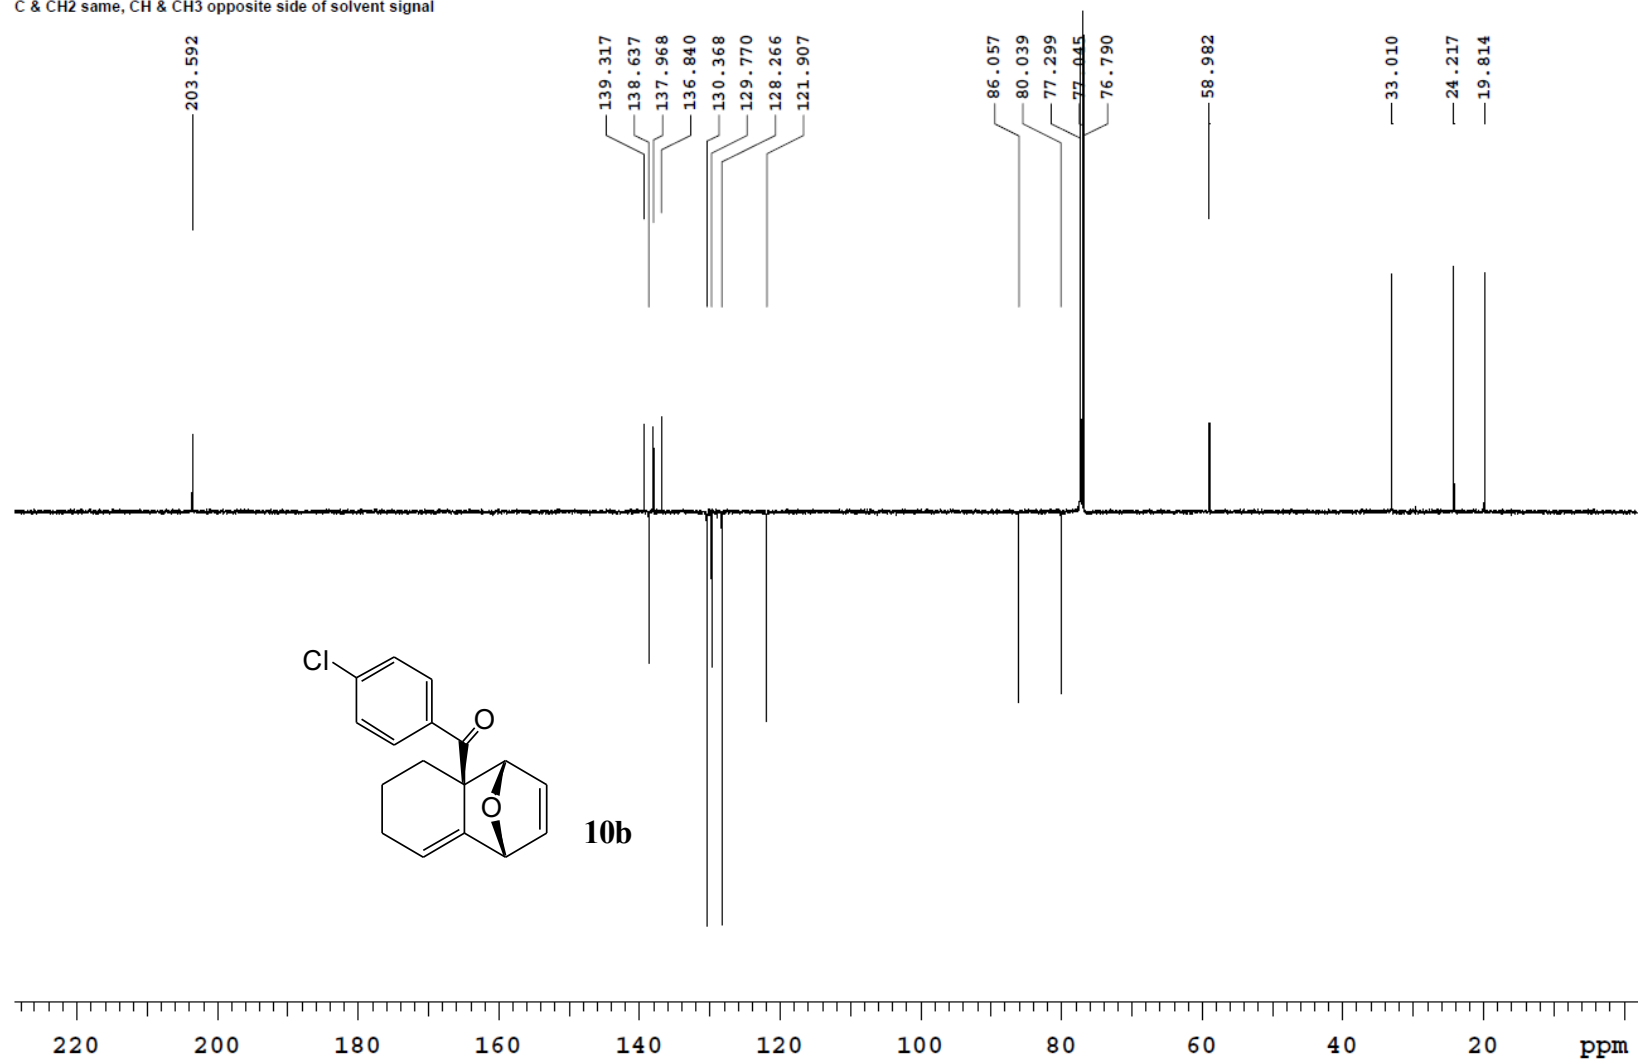

Baolei, BLW-I-115B-1  
499.806 MHz H1 ROESY in cdcl3 (ref. to CDCl3 @ 7.26 ppm), temp 27.7 C -> actual temp = 27.0 C, cold dual probe

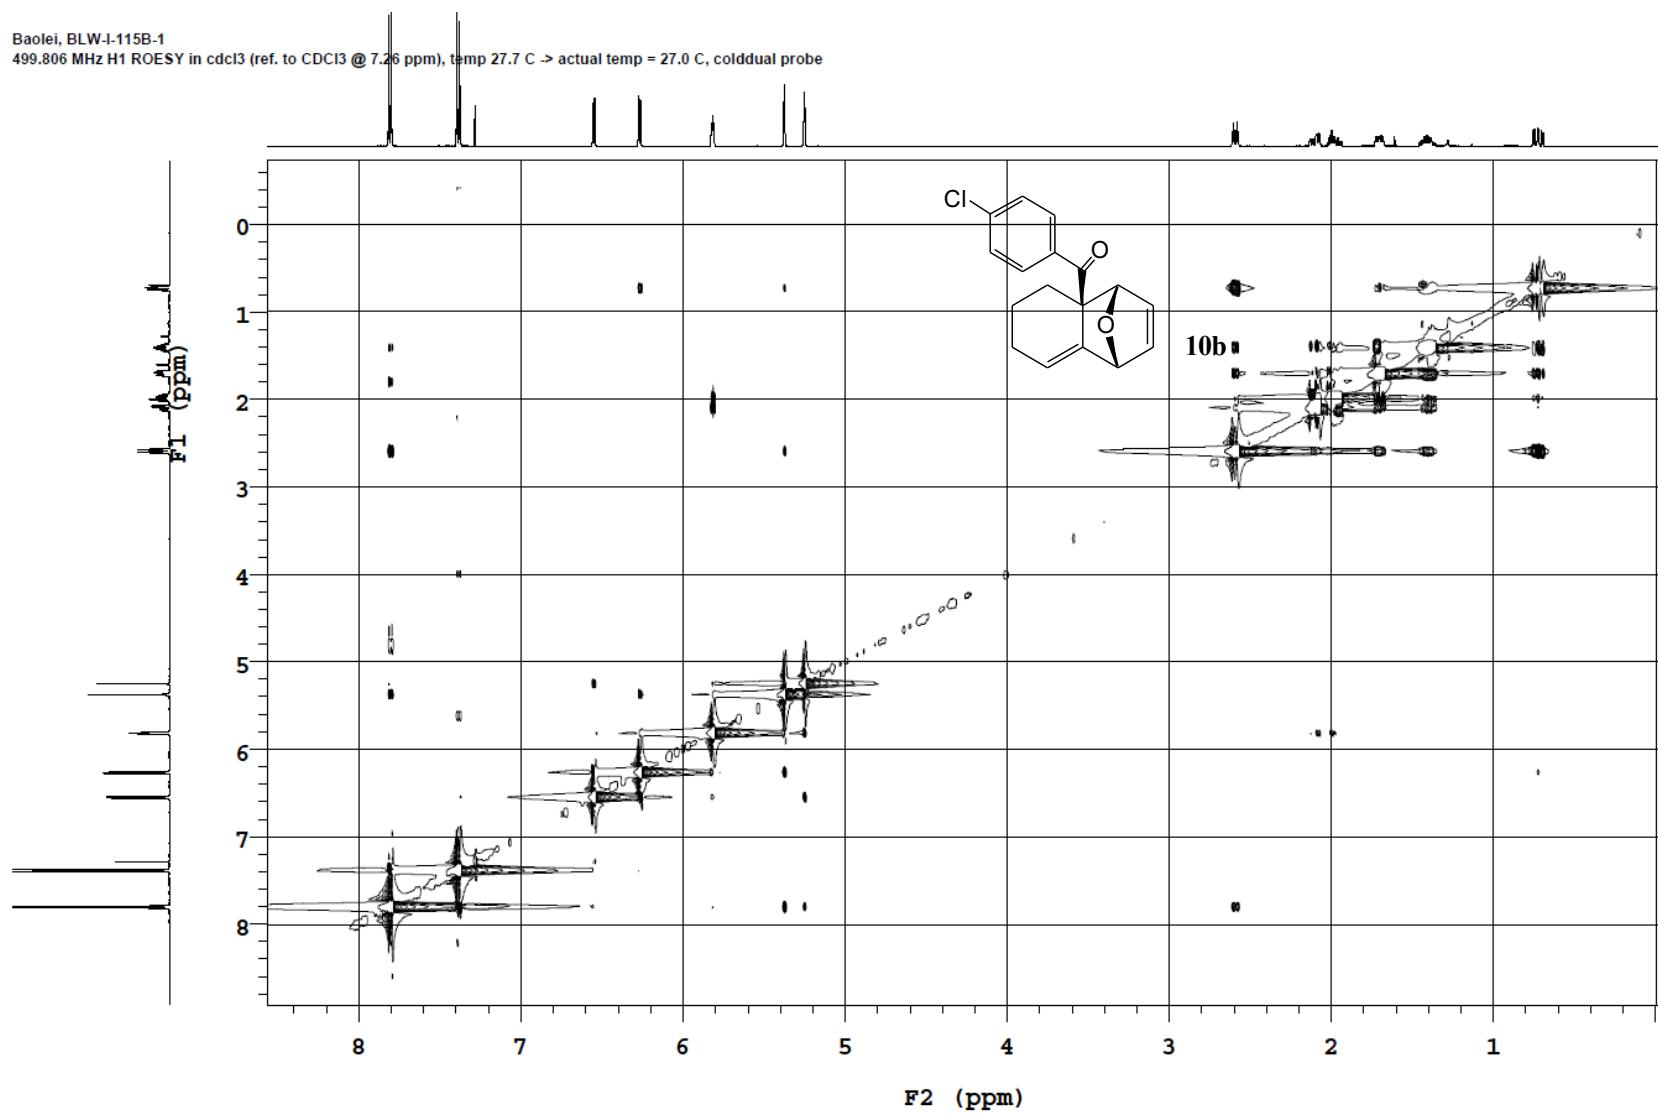

Baolei, BLW-I-121B-1  
499.806 MHz H1 PRESAT in cdcl3 (ref. to CDCI3 @ 7.26 ppm), temp 27.7 C -> actual temp = 27.0 C, colddual probe

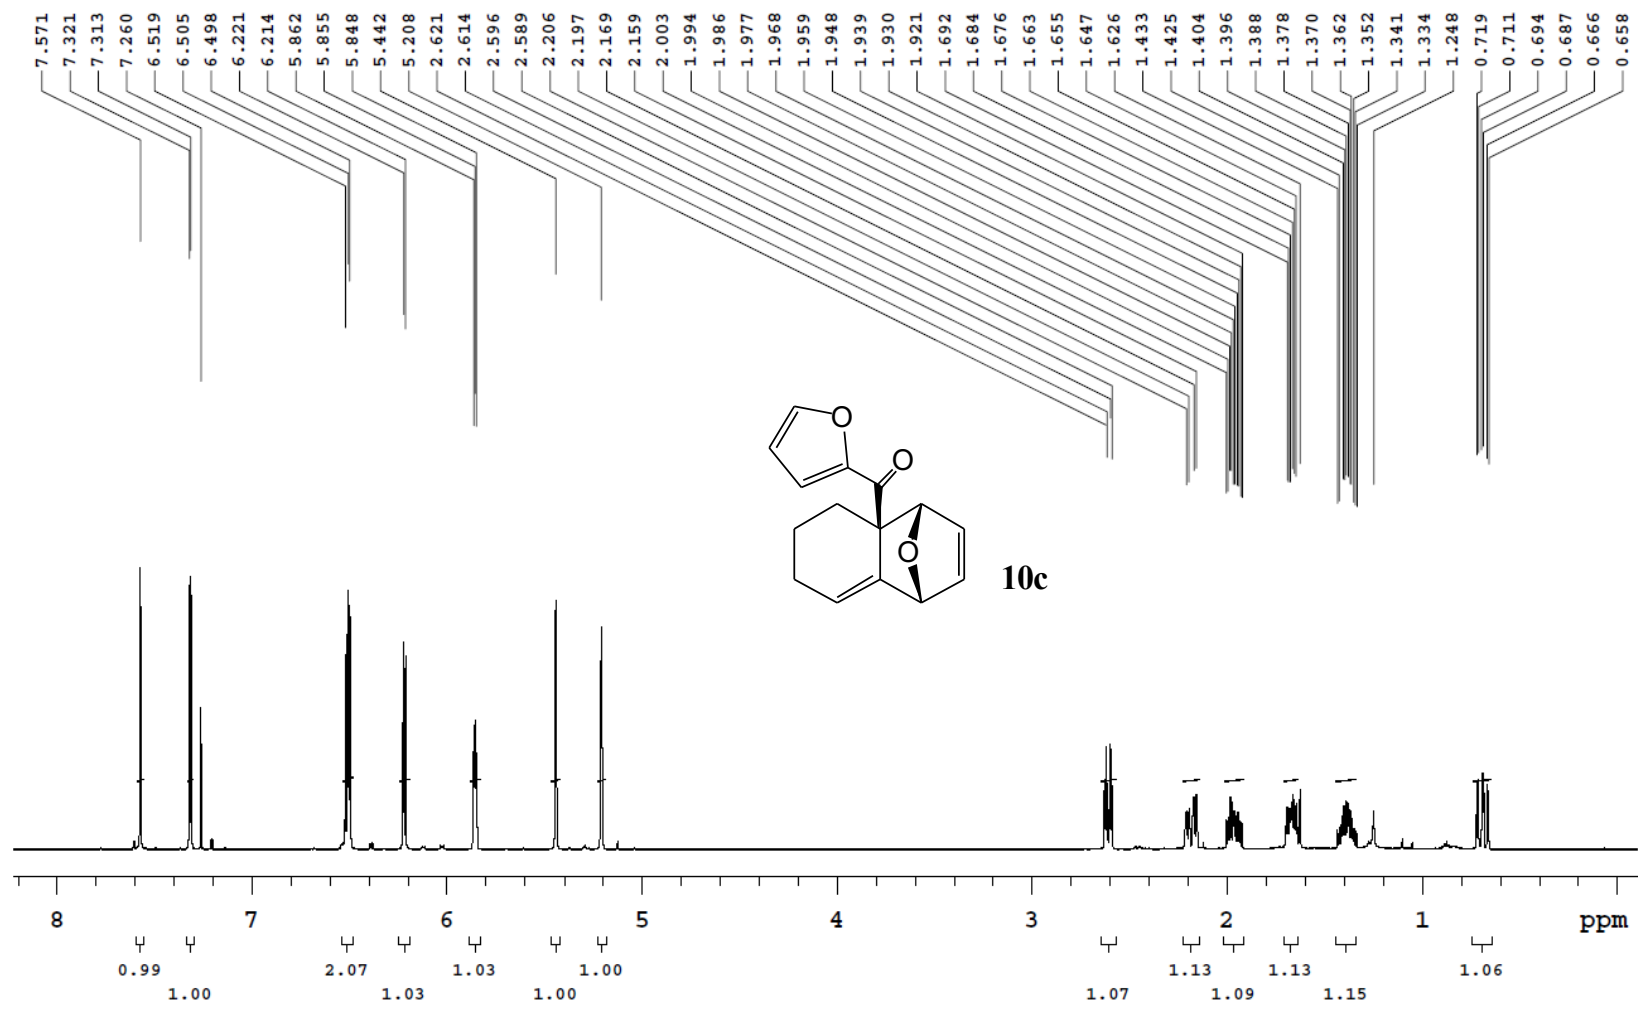

Baolei, BLW-I-121B-1  
125.690 MHz C13[H1] APT\_ad in cdcl3 (ref. to CDCI3 @ 77.06 ppm), temp 27.7 C -> actual temp = 27.0 C, cold dual probe  
C & CH2 same, CH & CH3 opposite side of solvent signal

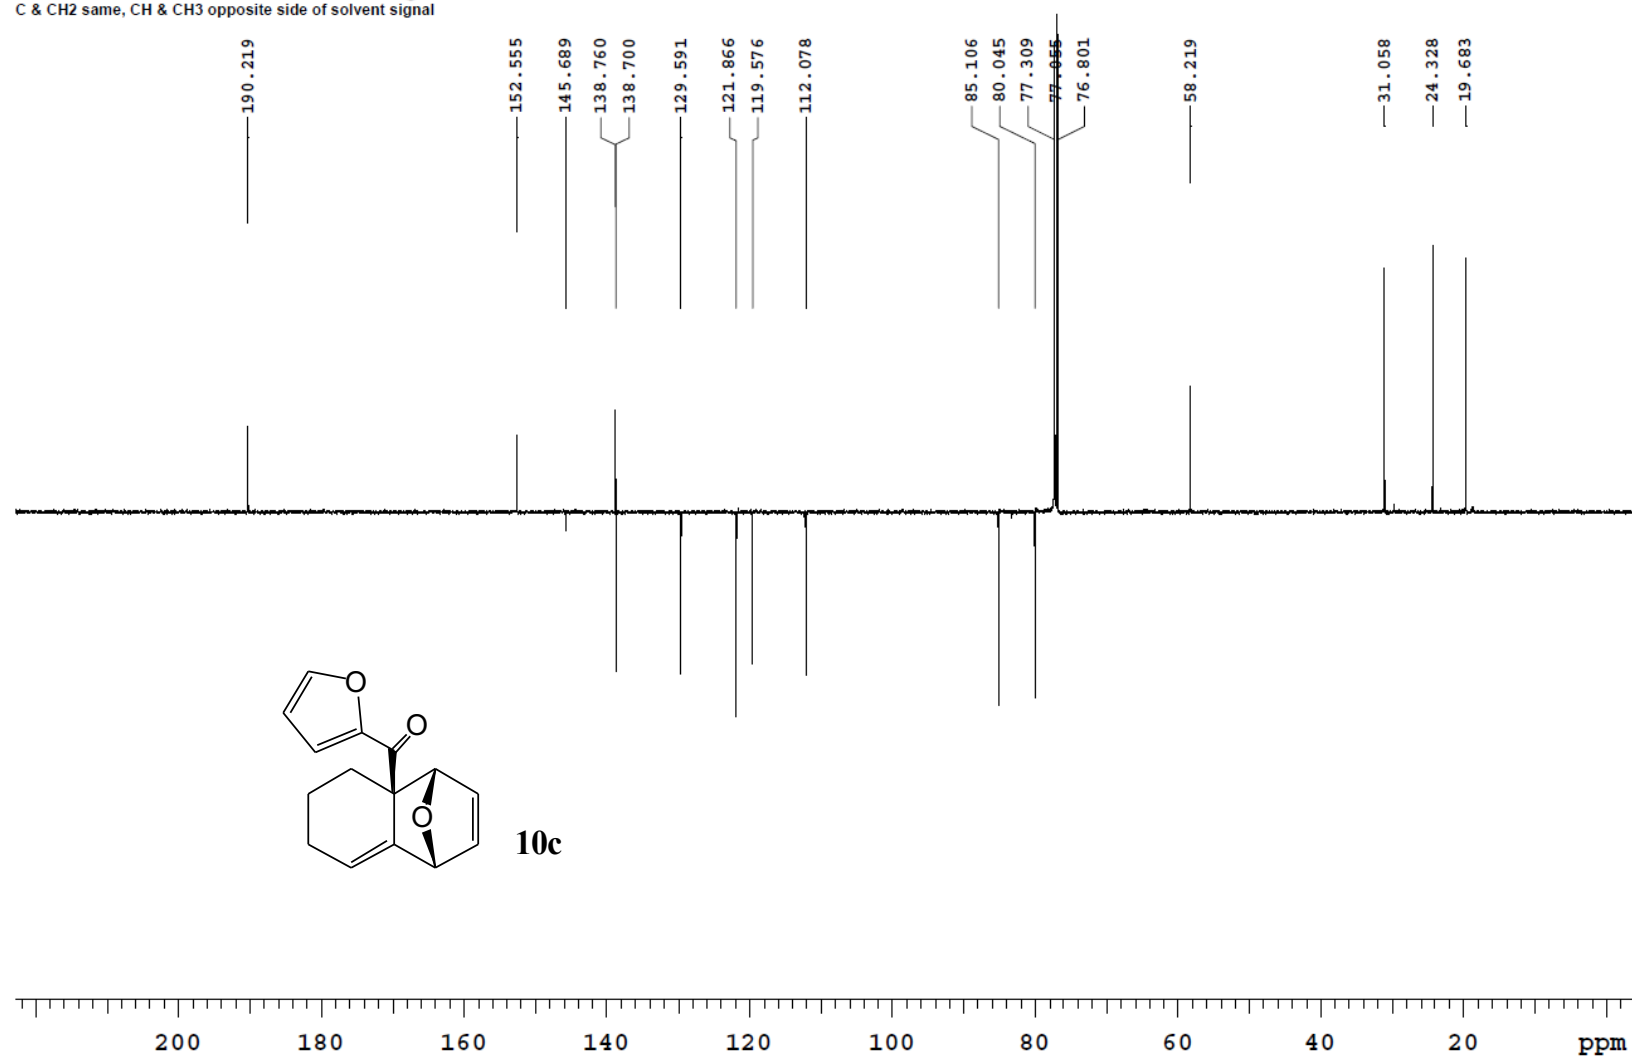



Baolei, BLW-I-121B-1  
499.806 MHz H1 ROESY in cdcl3 (ref. to CDC13 @ 7.26 ppm), temp 27.7 C -> actual temp = 27.0 C, cold dual probe

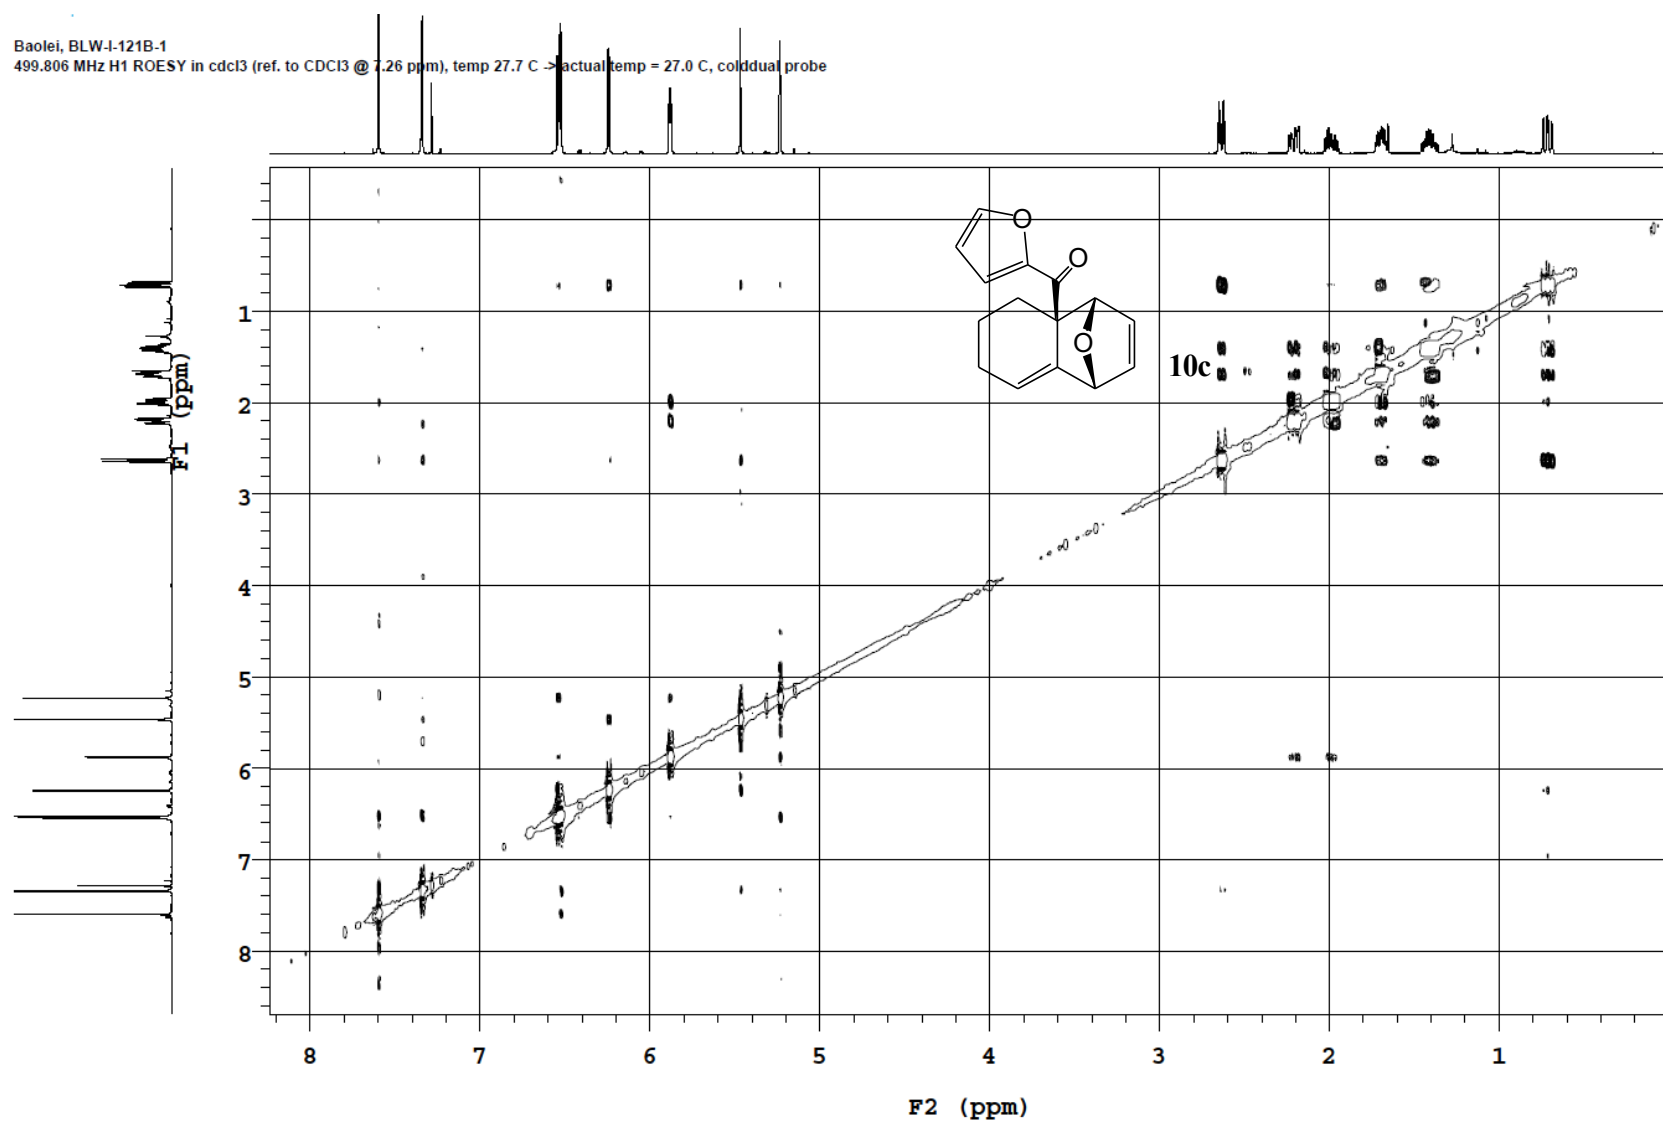

Baolei, BLW-1-147A-2  
499.806 MHz H1 PRESAT in cdcl3 (ref. to CDCl3 @ 7.26 ppm), temp 27.7 C -> actual temp = 27.0 C, cold dual probe

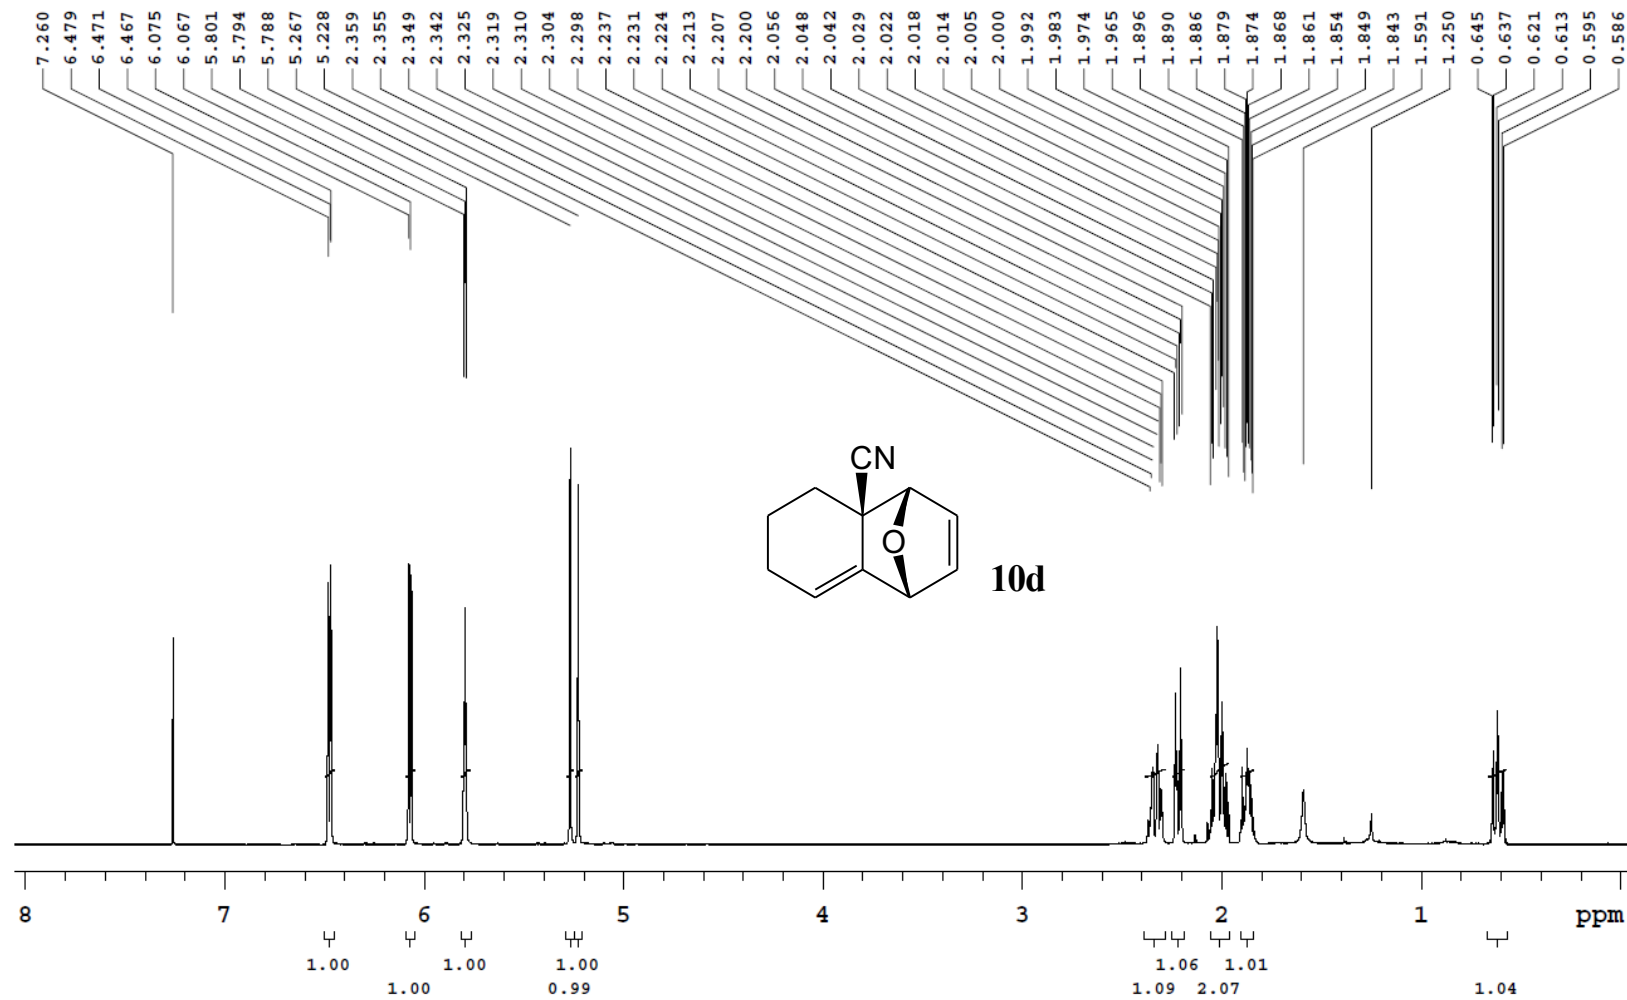

Baolei, BLW-I-147A-2  
125.690 MHz C13[H1] APT\_ad in cdcl3 (ref. to CDC13 @ 77.06 ppm), temp 27.7 C -> actual temp = 27.0 C, coldual probe  
C & CH2 same, CH & CH3 opposite side of solvent signal

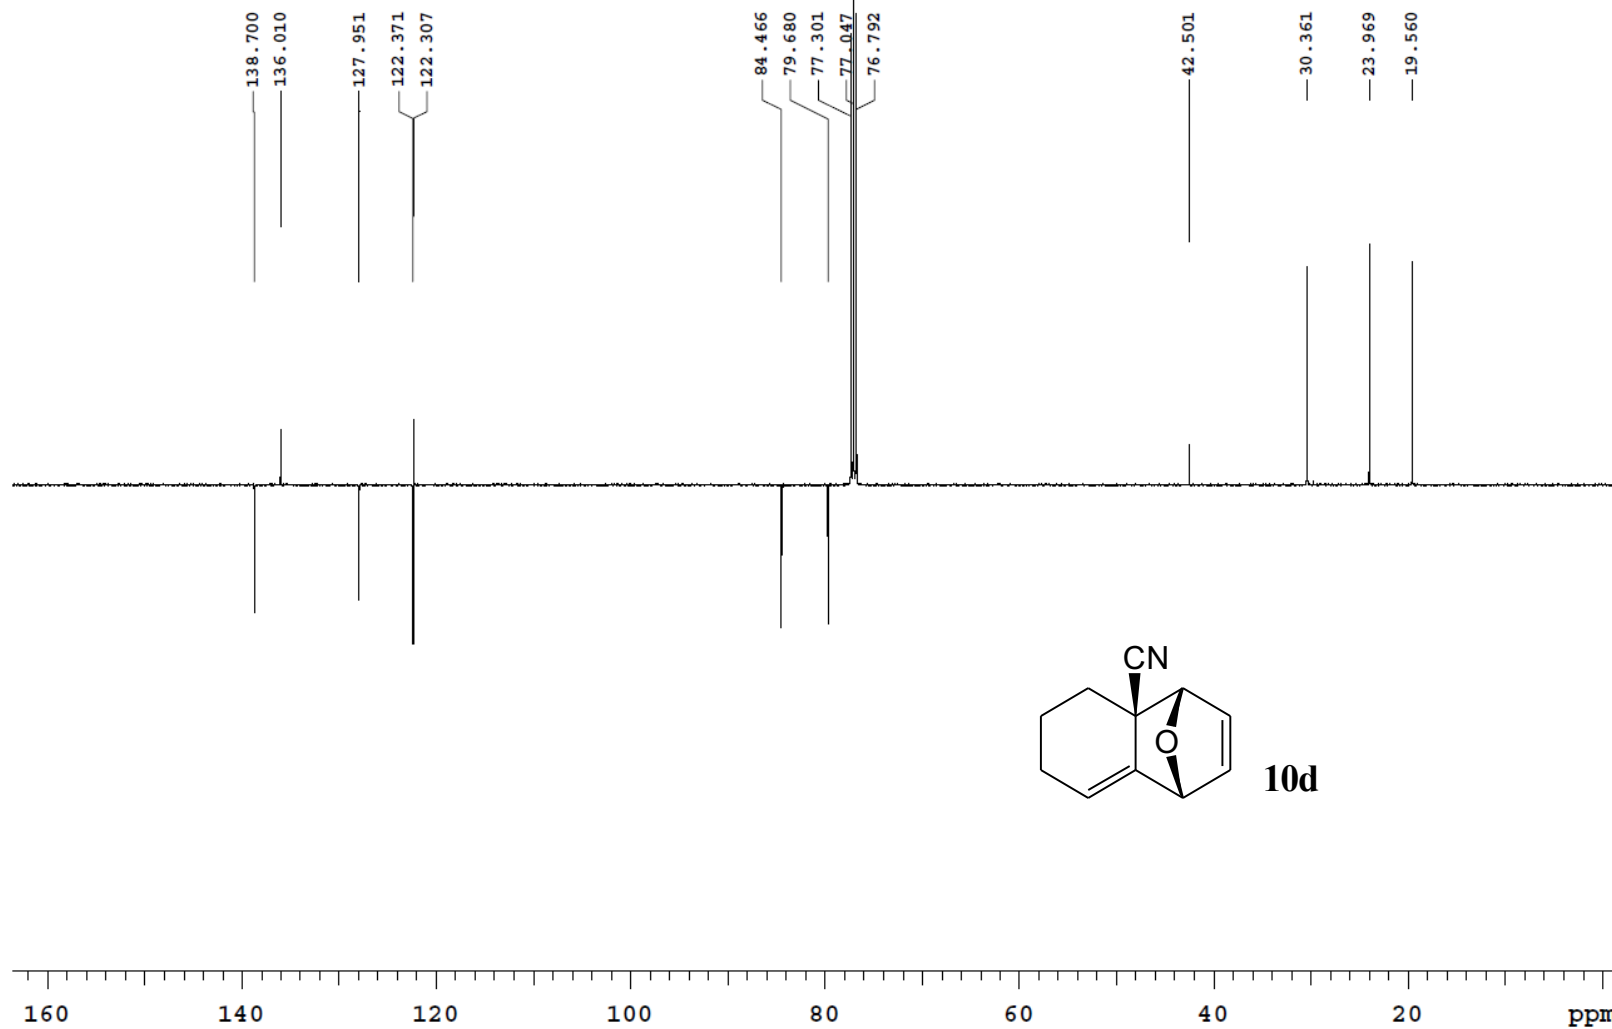

Baolei, BLW-1-147A-2  
499.806 MHz H1 ROESY in cdcl3 (ref. to CDCl3 @ 7.26 ppm), temp 27.7 C -> actual temp = 27.0 C, coldddal probe

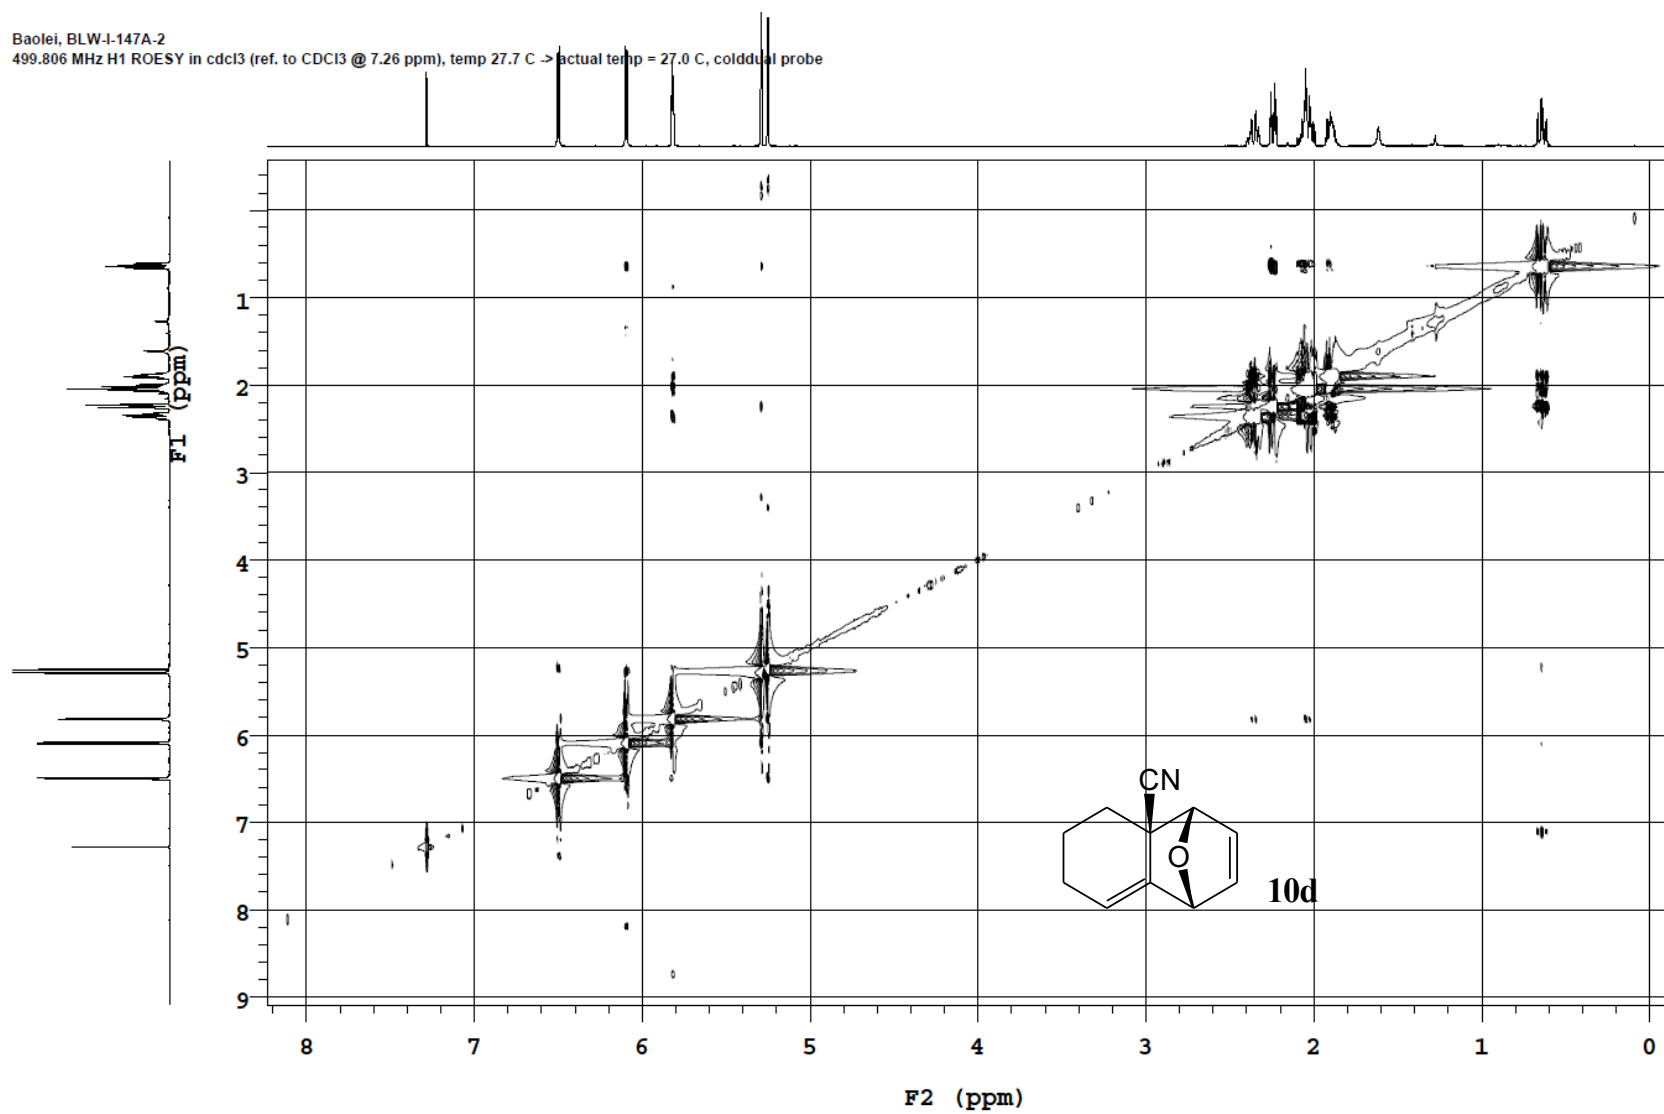

Baolei, BLW-I-161A-2  
499.806 MHz H1 PRESAT in cdcl3 (ref. to CDCI3 @ 7.26 ppm), temp 27.7 C -> actual temp = 27.0 C, colddual probe

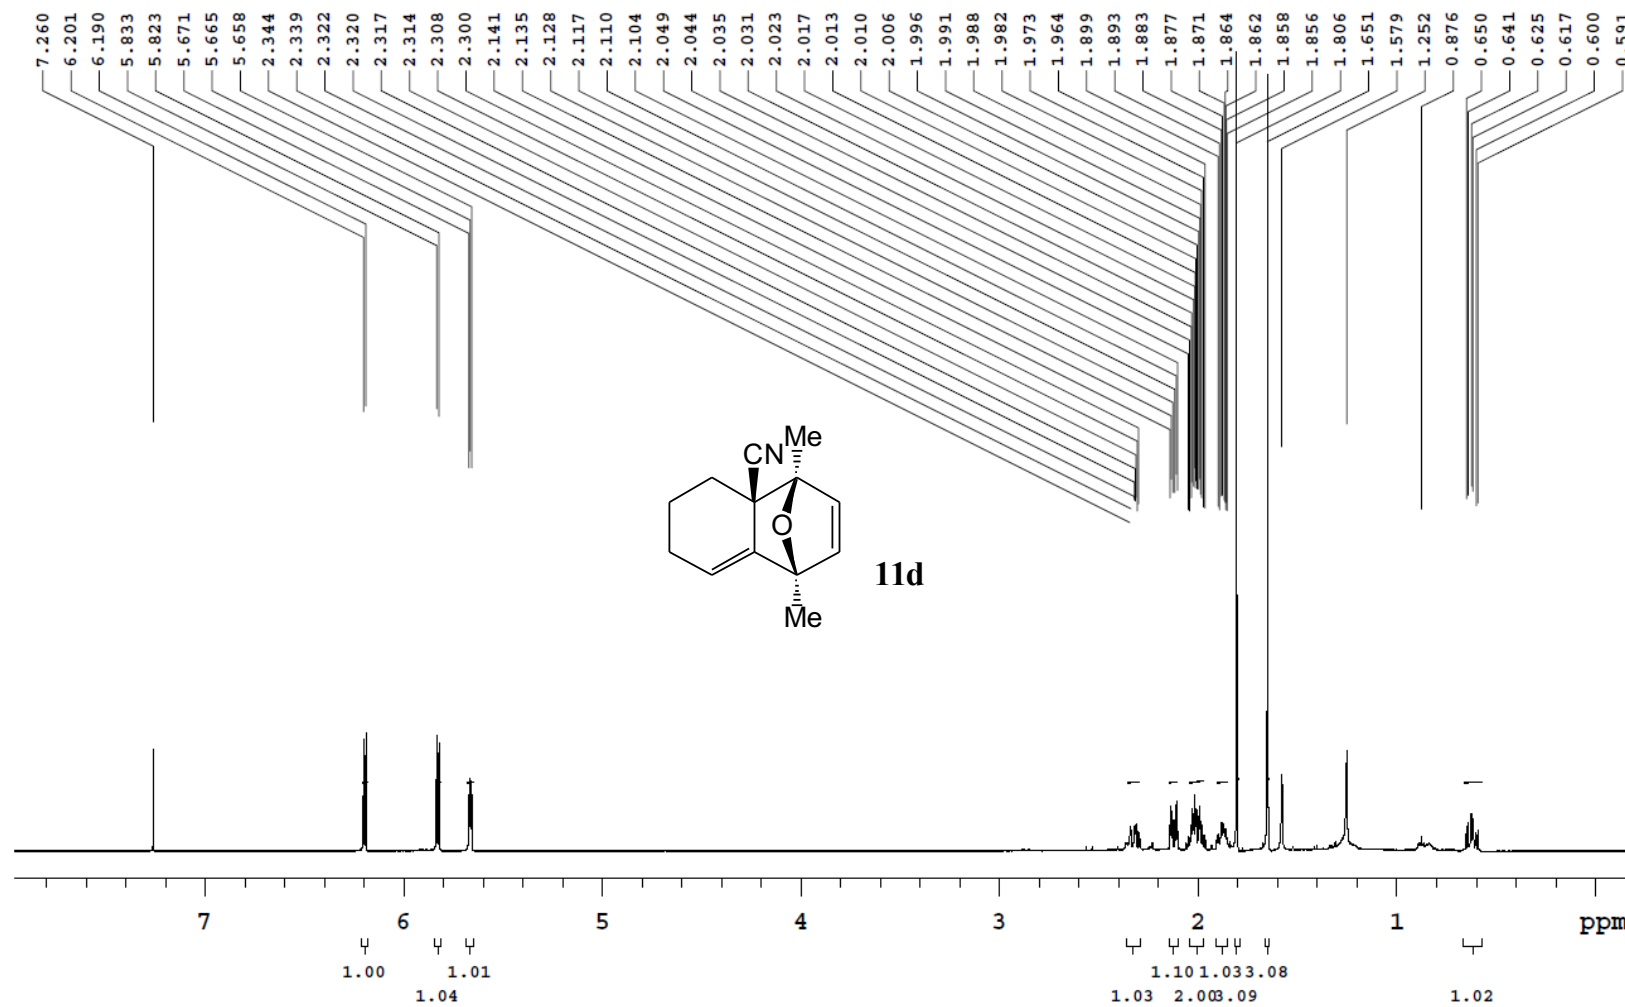

Baolei, BLWJ-161A-2  
125.690 MHz C13[H1] APT\_ad in cdcl3 (ref. to CDCl3 @ 77.06 ppm), temp 27.7 C -> actual temp = 27.0 C, cold dual probe  
C & CH2 same, CH & CH3 opposite side of solvent signal

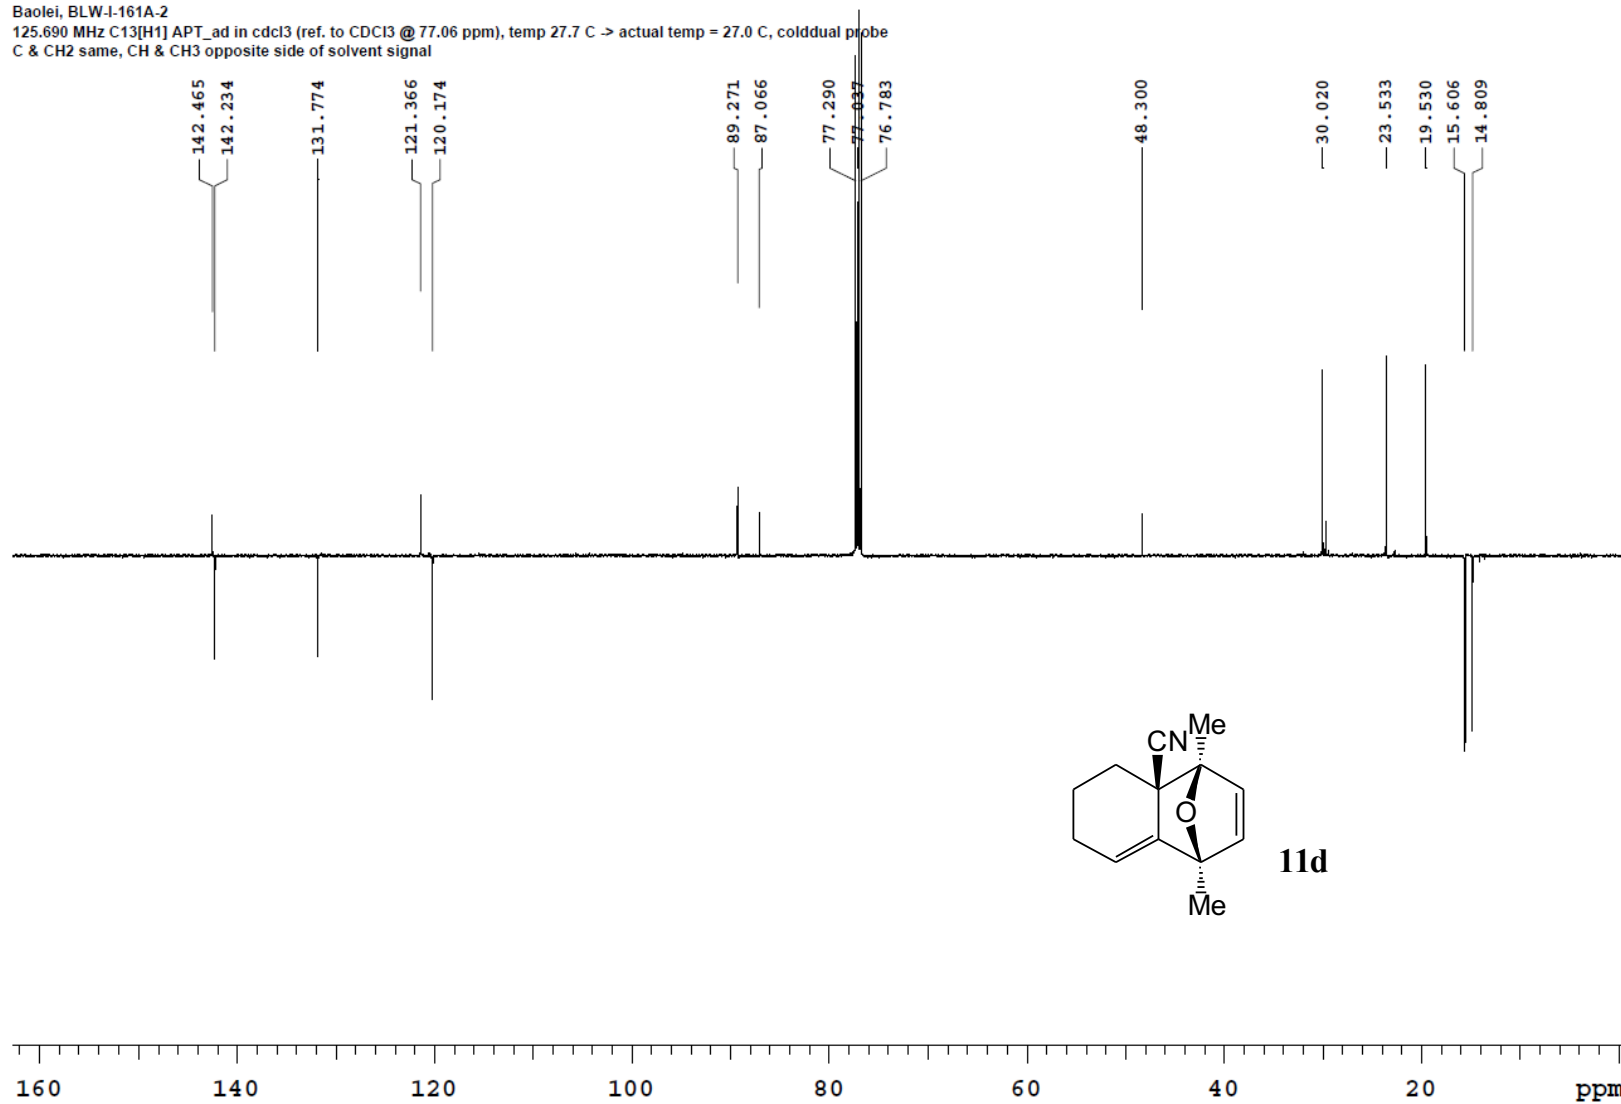

Baolei, BLW-I-161A-2  
499.806 MHz H1 ROESY in cdcl3 (ref. to CDCl3 @ 7.26 ppm), temp 27.7 C -> actual temp = 27.0 C, cold dual probe

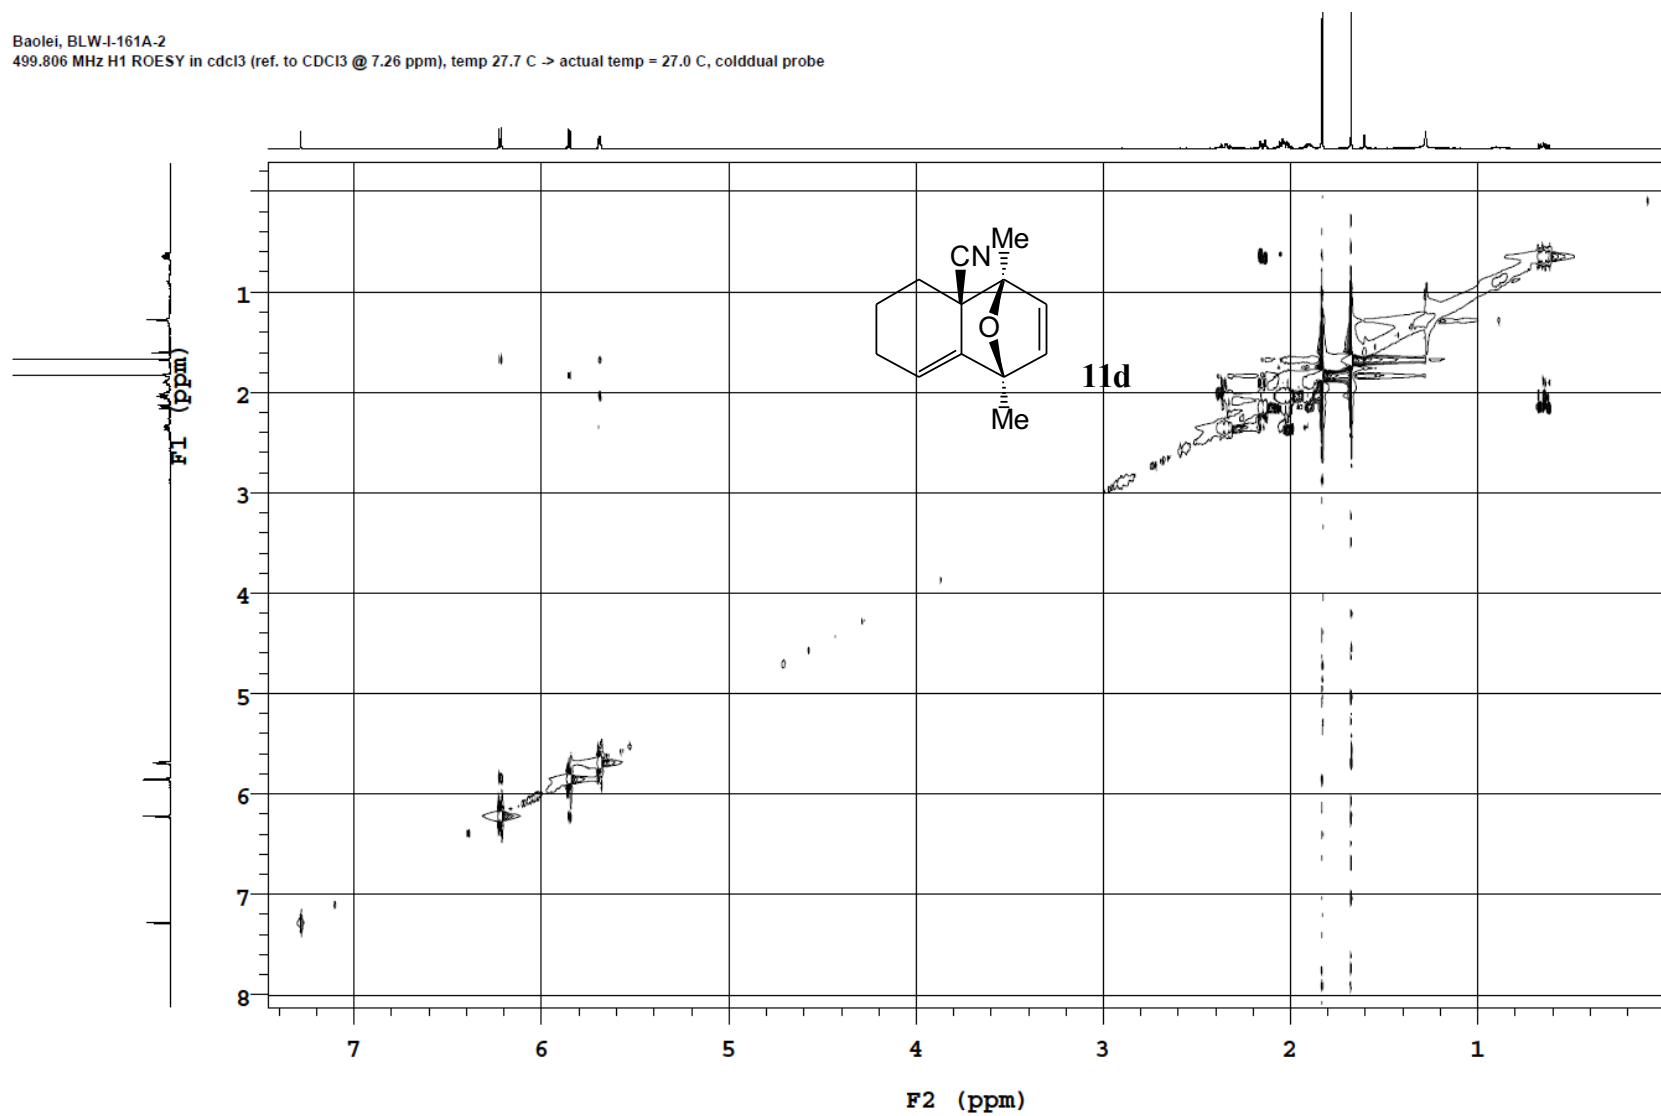

Baolei, BLW-I-125A-1\_2  
499.806 MHz H1 PRESAT in cdcl3 (ref. to CDC13 @ 7.26 ppm), temp 27.7 C -> actual temp = 27.0 C, colddual probe

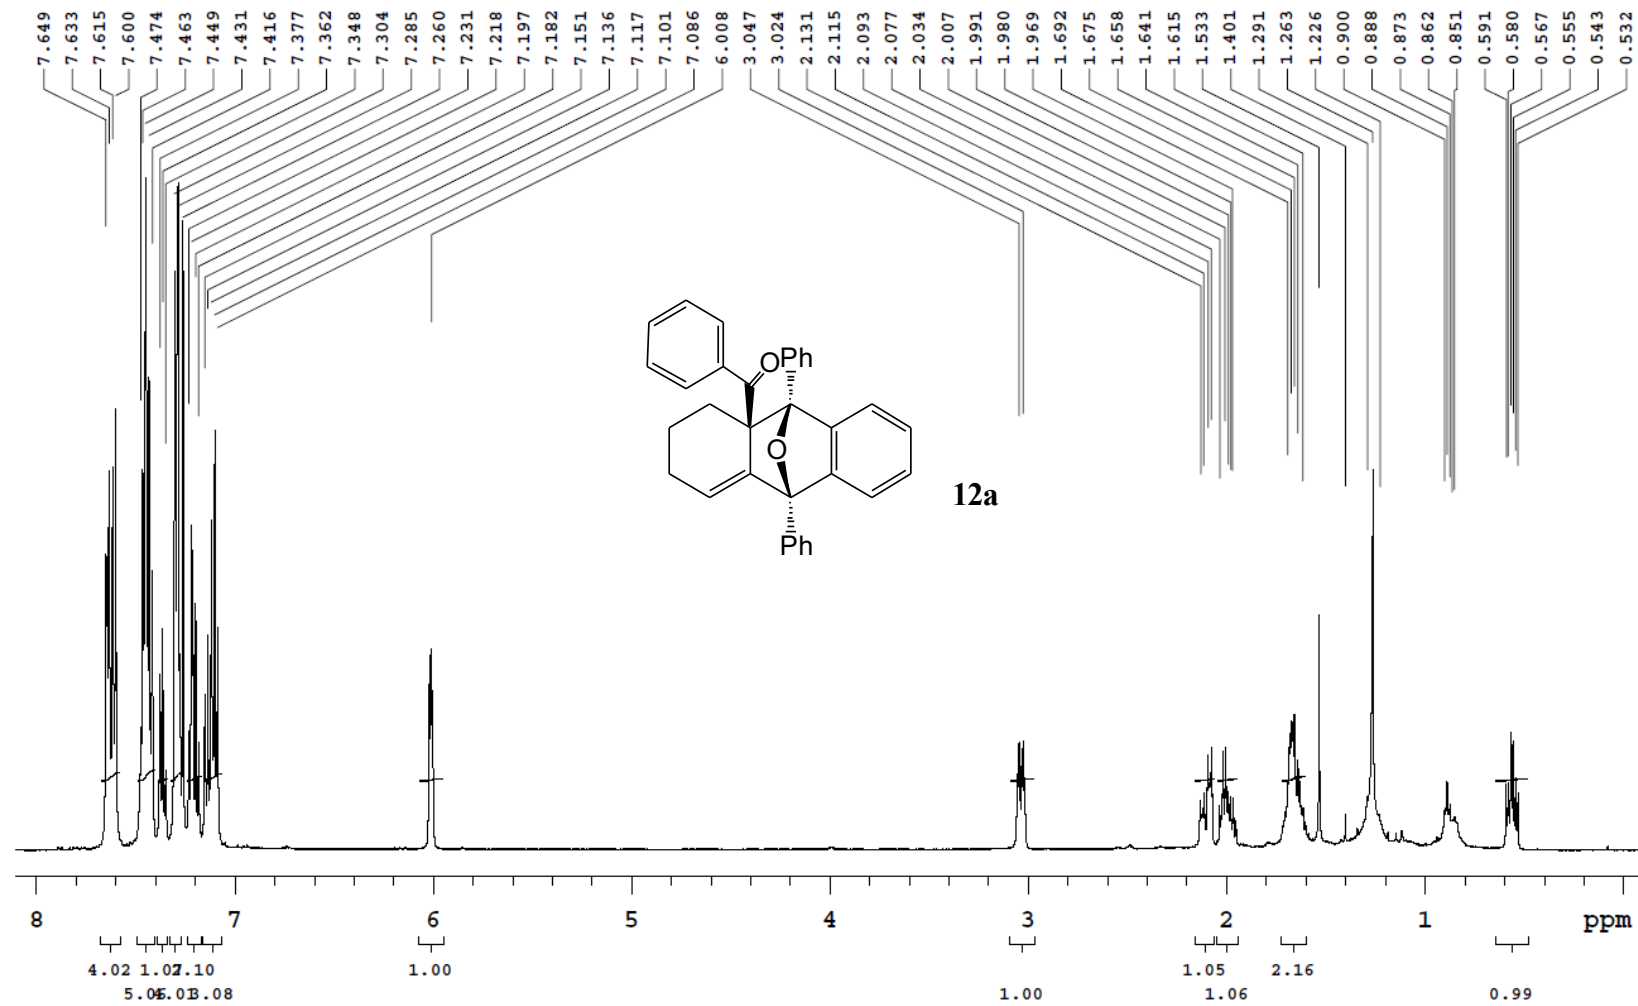



Baolei, BLW-I-125A-1\_2  
125.690 MHz C13[H1] APT\_ad in cdcl3 (ref. to CDCI3 @ 77.06 ppm), temp 27.7 C -> actual temp = 27.0 C, cold dual probe  
C & CH2 same, CH & CH3 opposite side of solvent signal

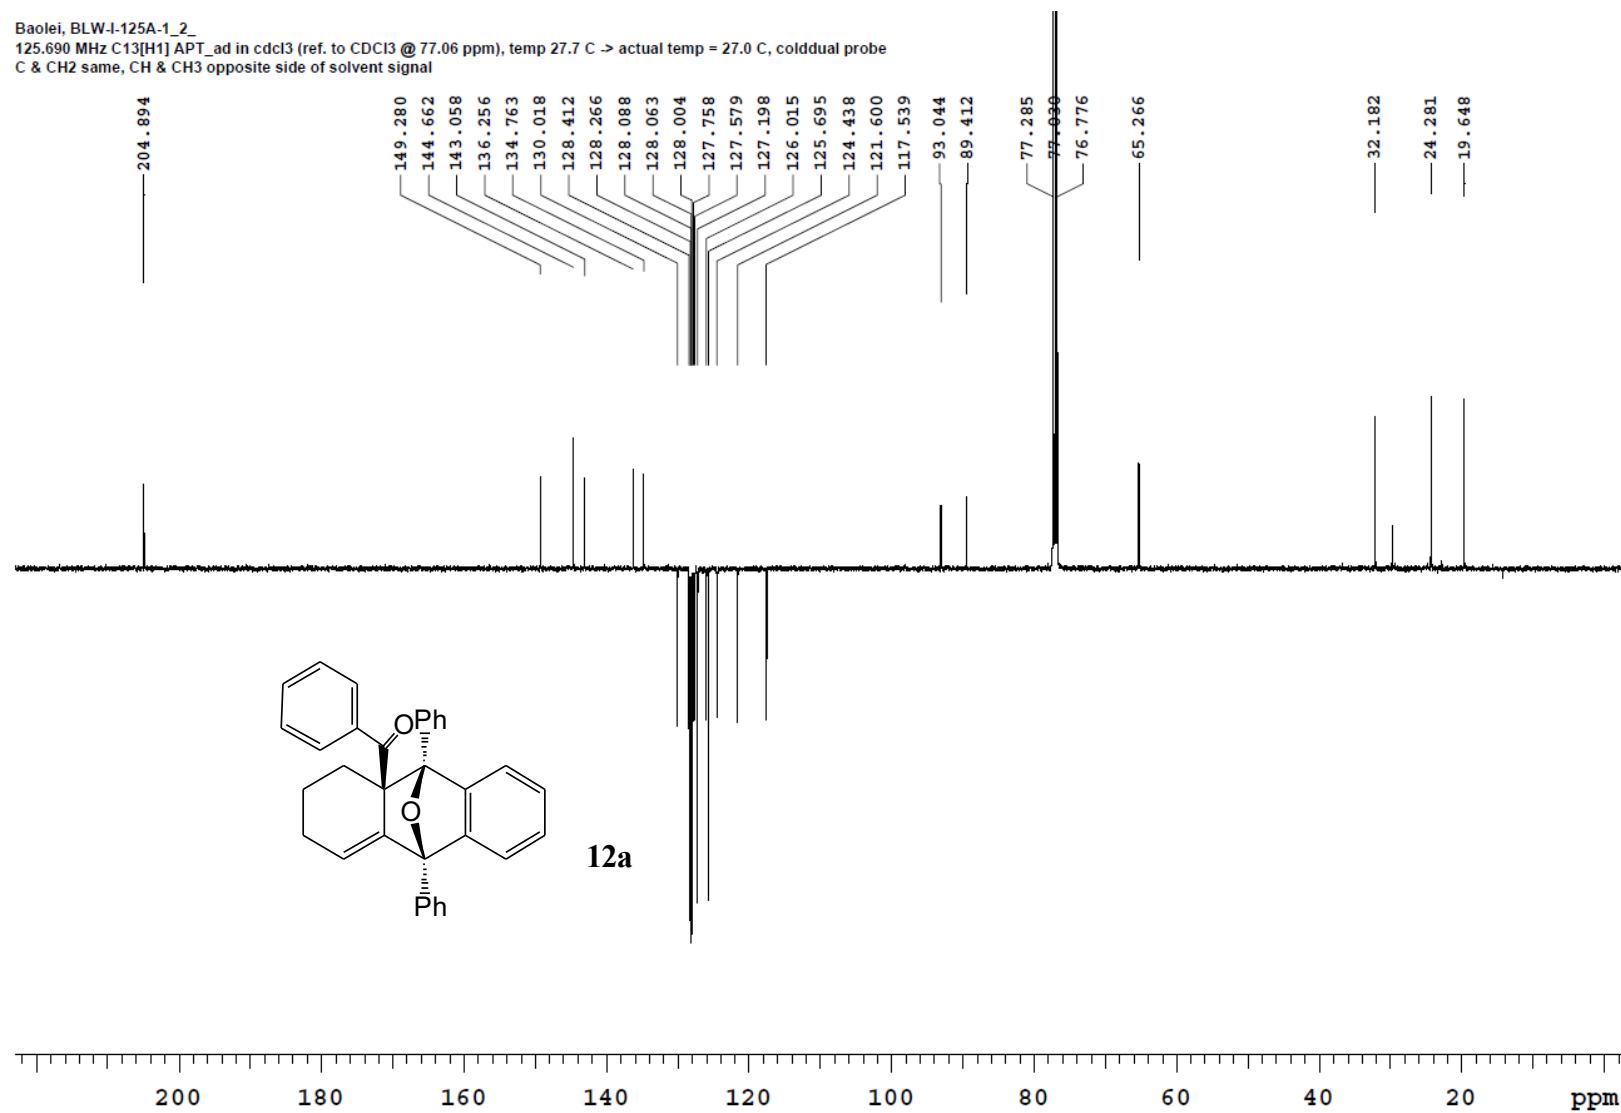

Baolei, BLW-I-125A-1\_2  
499.806 MHz H1 ROESY in cdcl3 (ref. to CDCl3 @ 7.26 ppm), temp 27.7 C -> actual temp = 27.0 C, cold dual probe

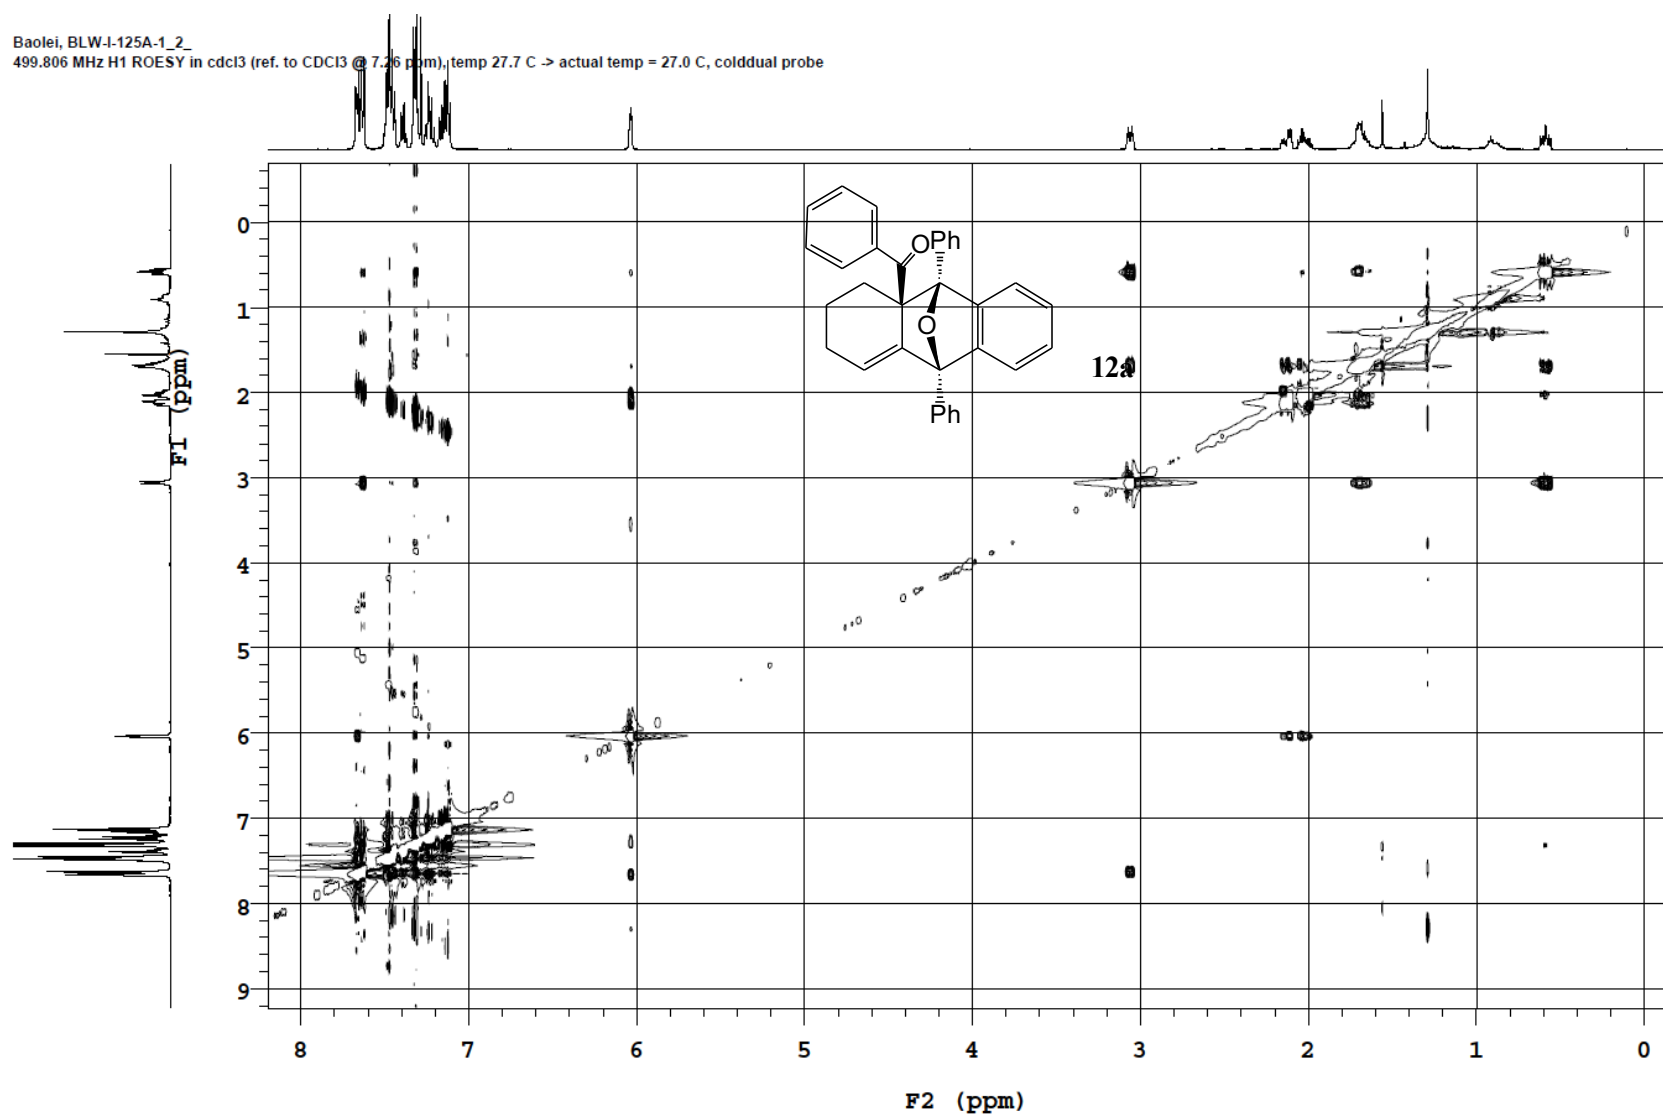

Baolei, BLW-I-121A-1  
499.806 MHz H1 PRESAT in cdcl3 (ref. to CDCl3 @ 7.26 ppm), temp 27.7 C -> actual temp = 27.0 C, cold dual probe

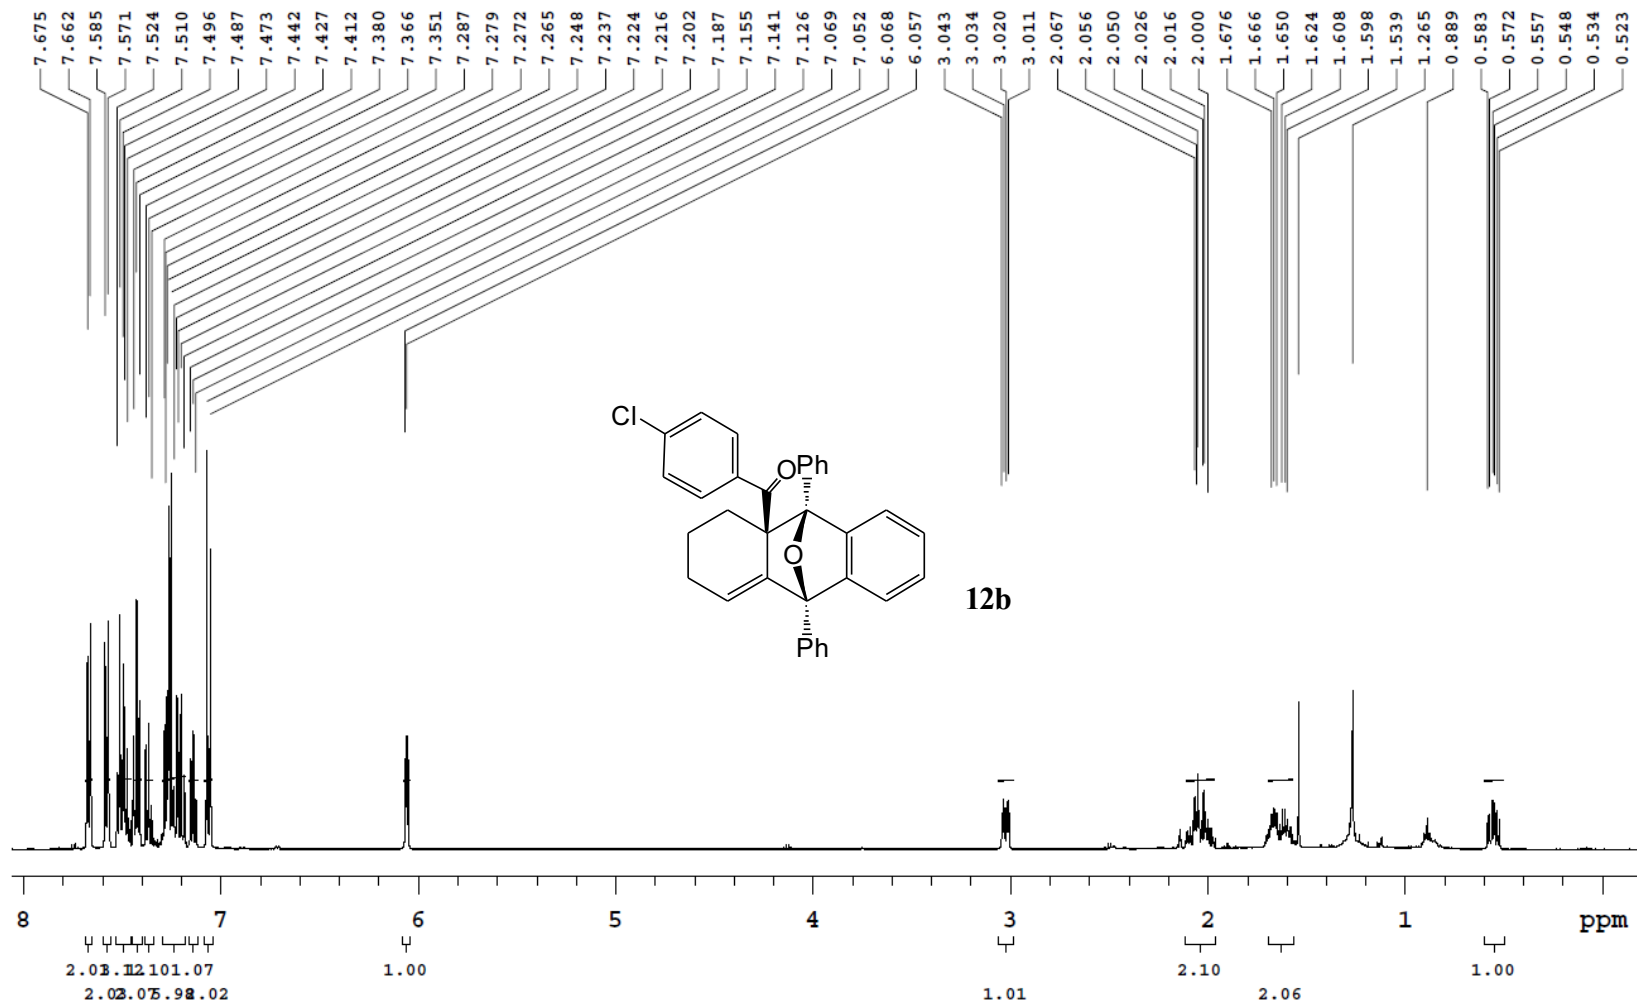

Baolei, BLW-I-121A-1  
125.690 MHz C13[H1] APT\_ad in cdcl3 (ref. to CDCl3 @ 77.06 ppm), temp 27.7 C -> actual temp = 27.0 C, cold dual probe  
C & CH2 same, CH & CH3 opposite side of solvent signal

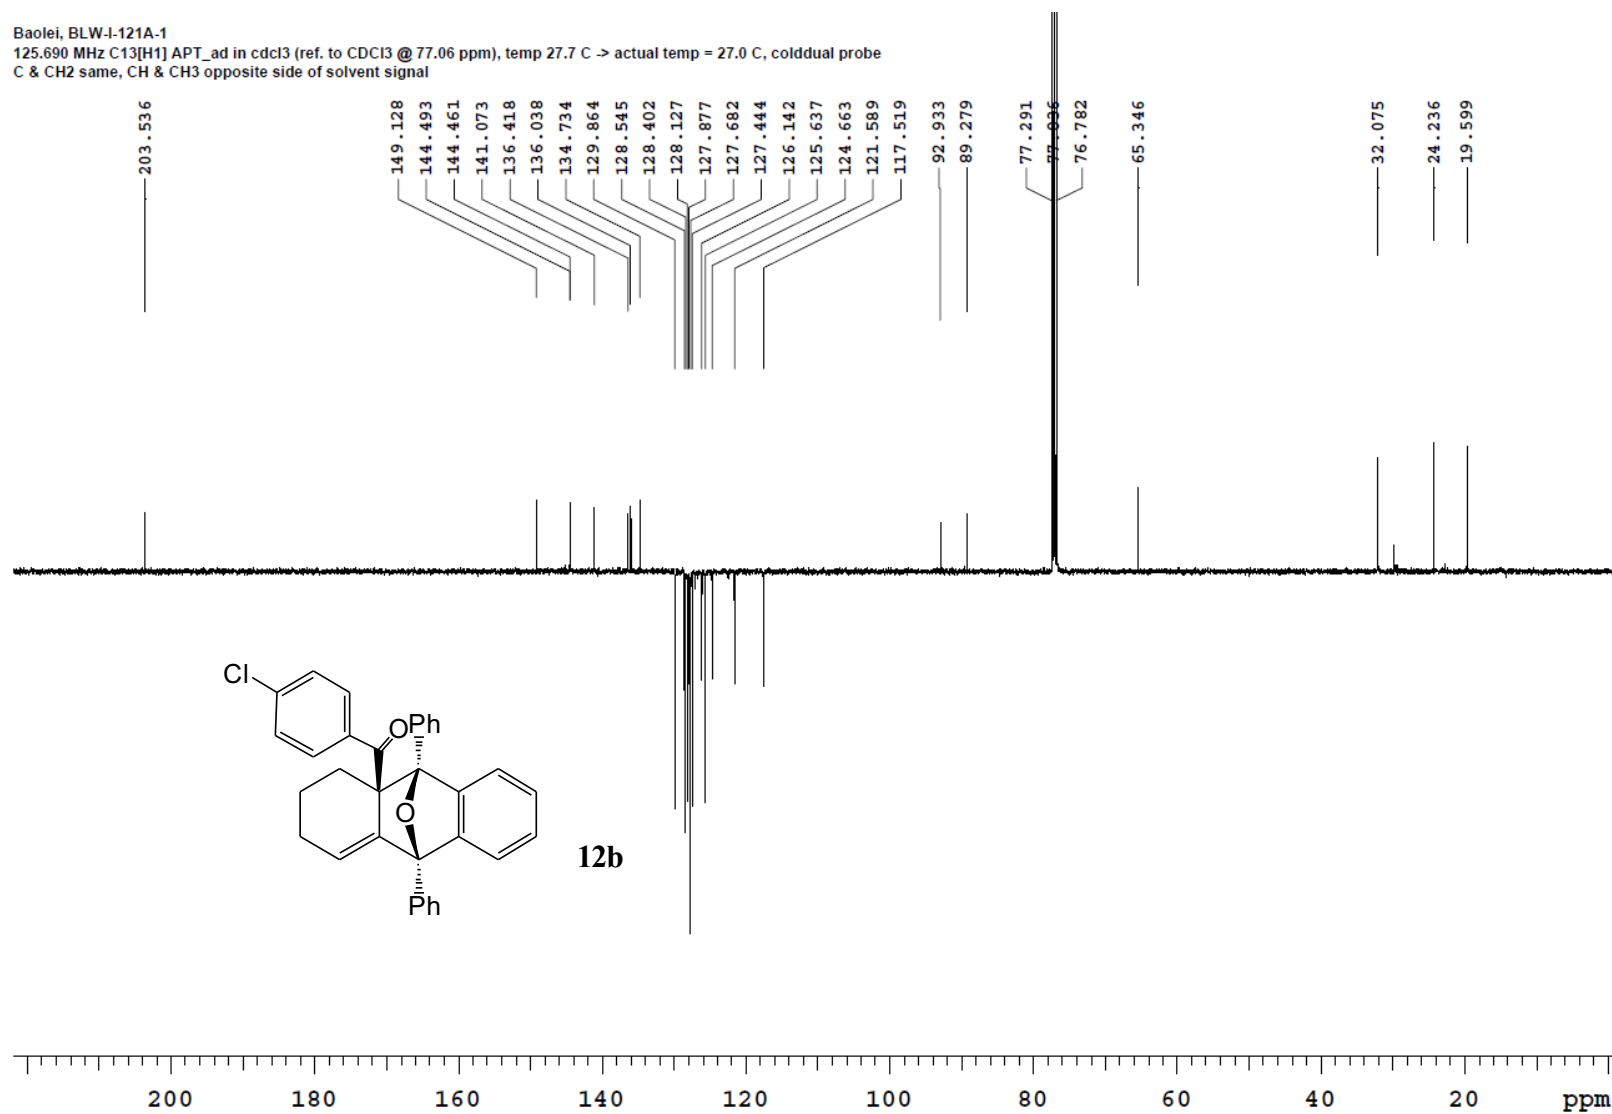

Baolei, BLW-I-121A-1  
499.806 MHz H1 ROESY in cdcl3 (ref. to CDCl3 @ 7.26 ppm), temp 27.7 C -> actual temp = 27.0 C, cold dual probe

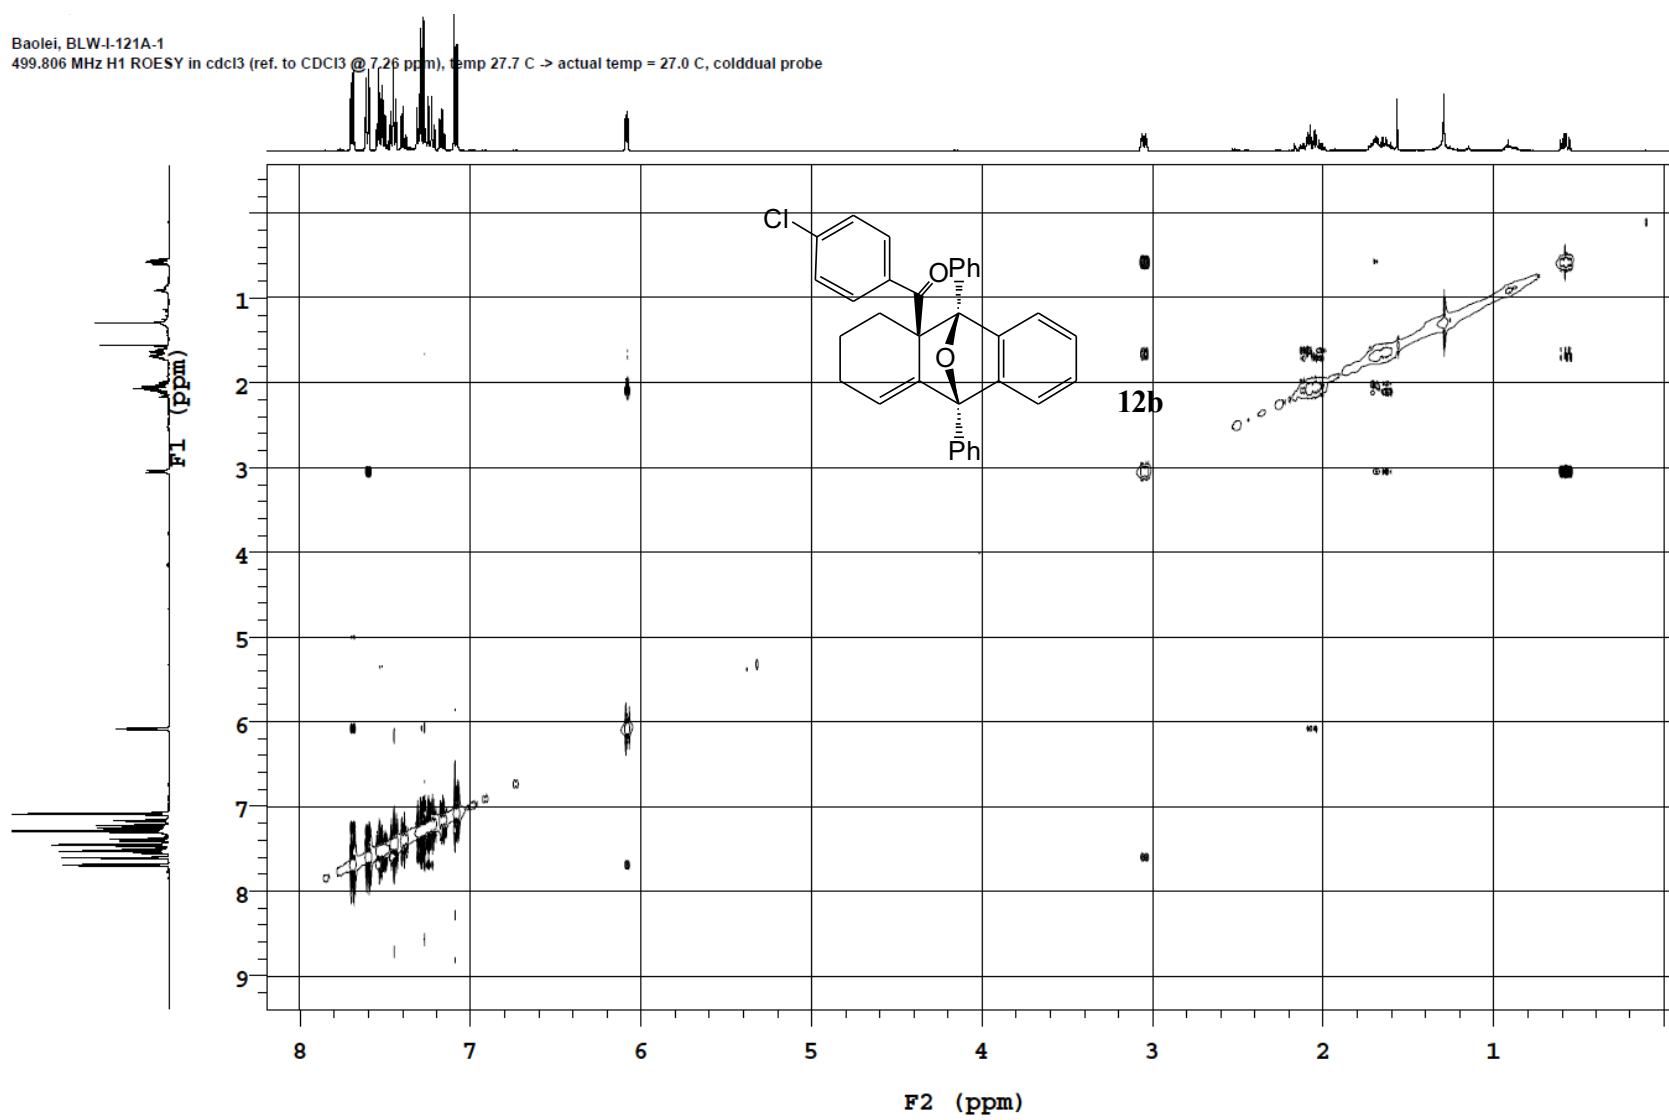

Baolei, BLW-I-125B-1\_3\_  
499.806 MHz H1 PRESAT in cdcl3 (ref. to CDCl3 @ 7.26 ppm), temp 27.7 C -> actual temp = 27.0 C, cold dual probe

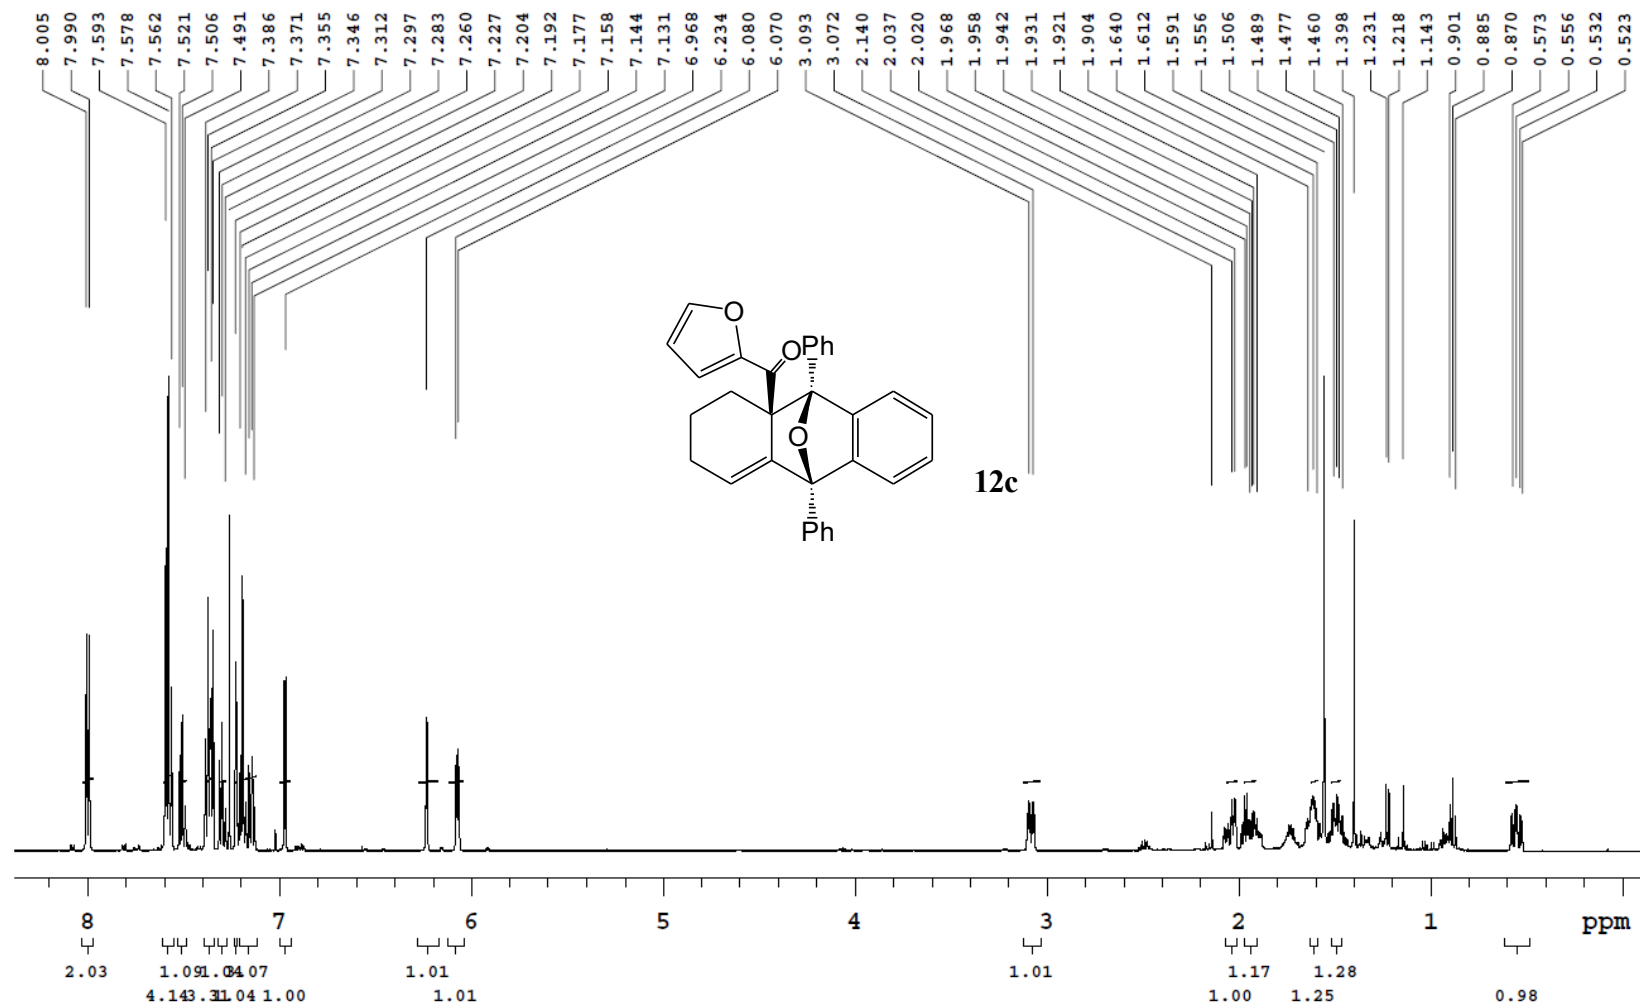

Baolei, BLW-I-125B-1\_2  
125.690 MHz C13[H1] APT\_ad in cdcl3 (ref. to CDCl3 @ 77.06 ppm), temp 27.7 C -> actual temp = 27.0 C, cold dual probe  
C & CH2 same, CH & CH3 opposite side of solvent signal

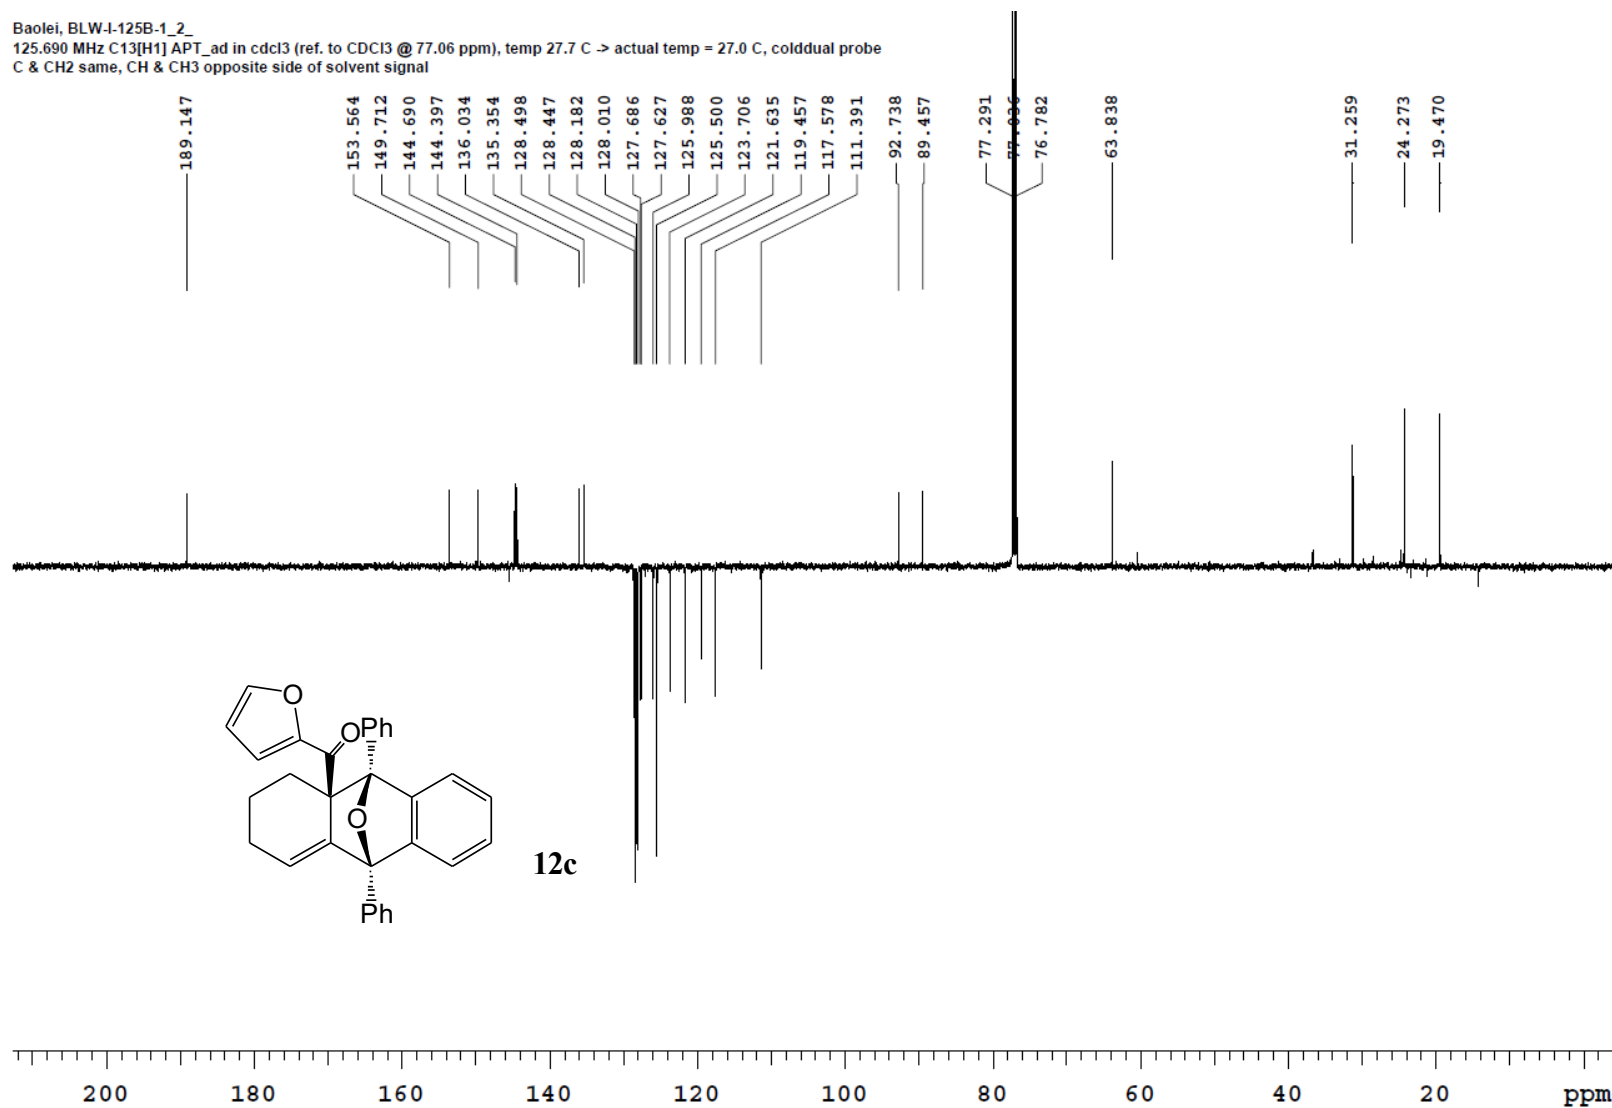

Baolei, BLW-I-125B-1\_3  
499.806 MHz H1 ROESY in cdcl3 (ref. to CDC13 @ 7.26 ppm), temp 27.7 C -> actual temp = 27.0 C, cold dual probe

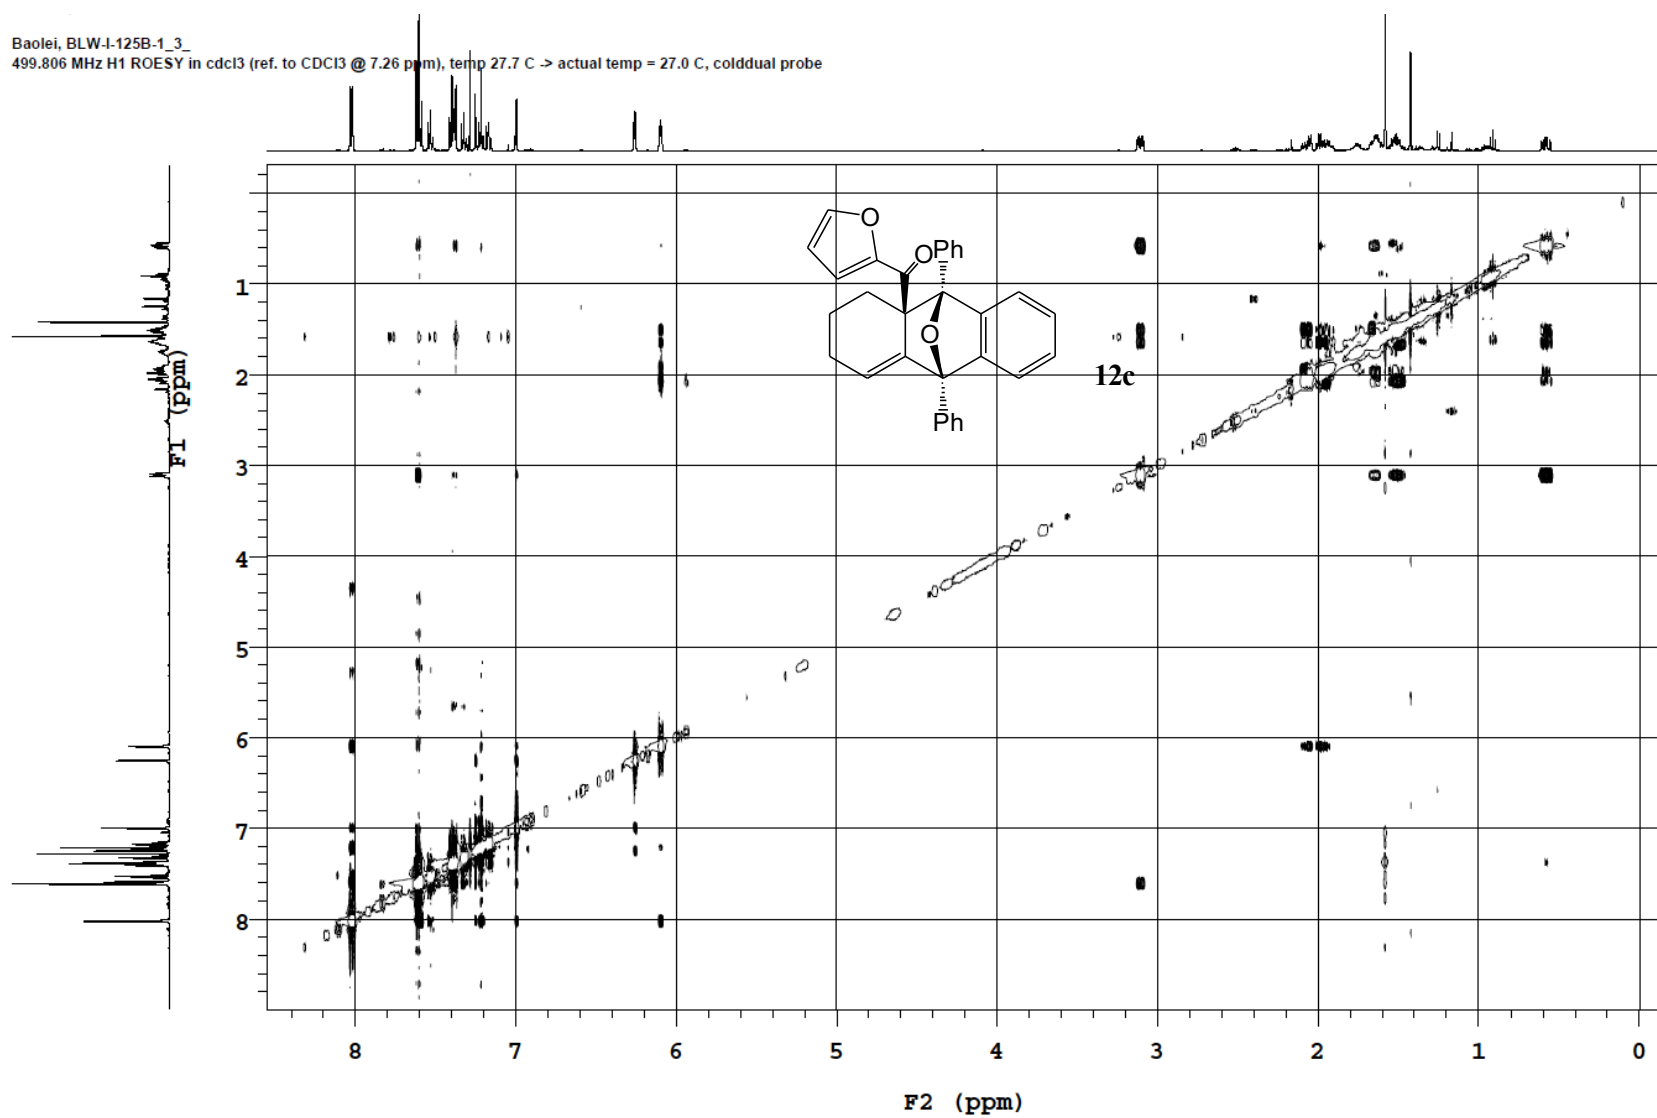



Baolei, BLW-1-155B-2\_2\_  
499.806 MHz H1 PRESAT in cdcl3 (ref. to CDC13 @ 7.26 ppm), temp 27.7 C -> actual temp = 27.0 C, colddual probe

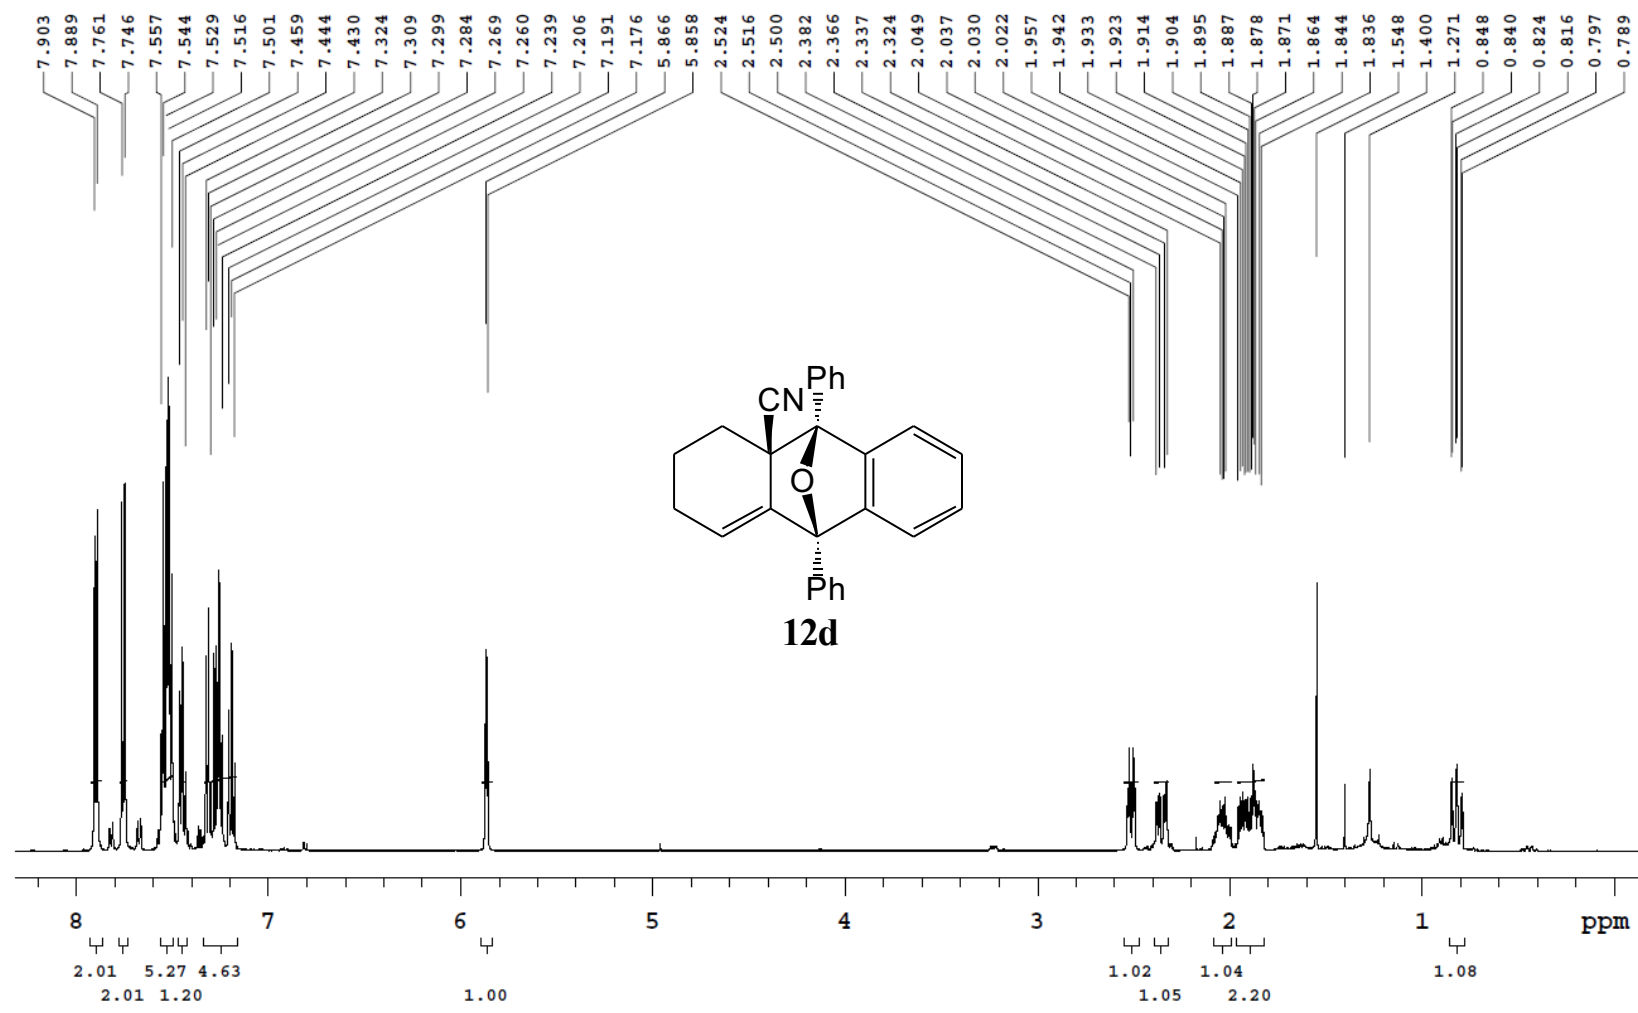

Baolei, BLW-I-155B-2\_2\_  
125.690 MHz C13[H1] APT\_ad in cdcl3 (ref. to CDCI3 @ 77.06 ppm), temp 27.7 C -> actual temp = 27.0 C, cold dual probe  
C & CH2 same, CH & CH3 opposite side of solvent signal

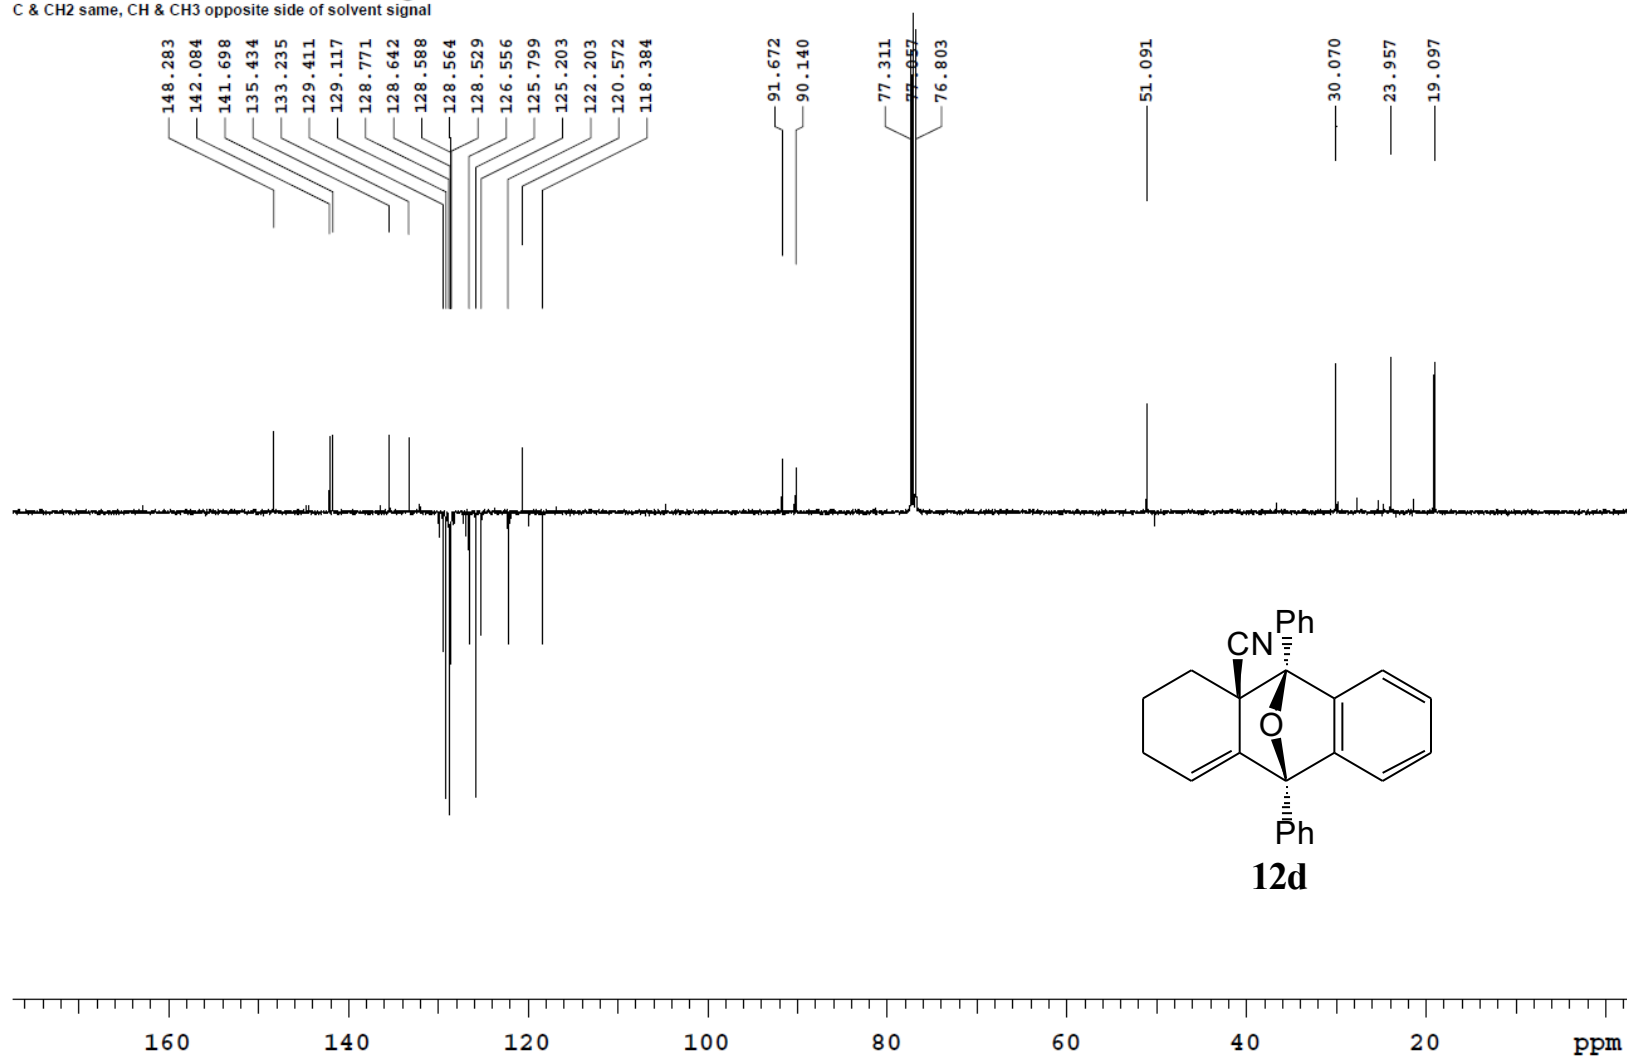

Baolei, BLW-1-155B-2\_2  
499.806 MHz H1 ROESY in cdcl3 (ref. to CDC13 @ 7.26 ppm) temp 27.7 C -> actual temp = 27.0 C, cold dual probe

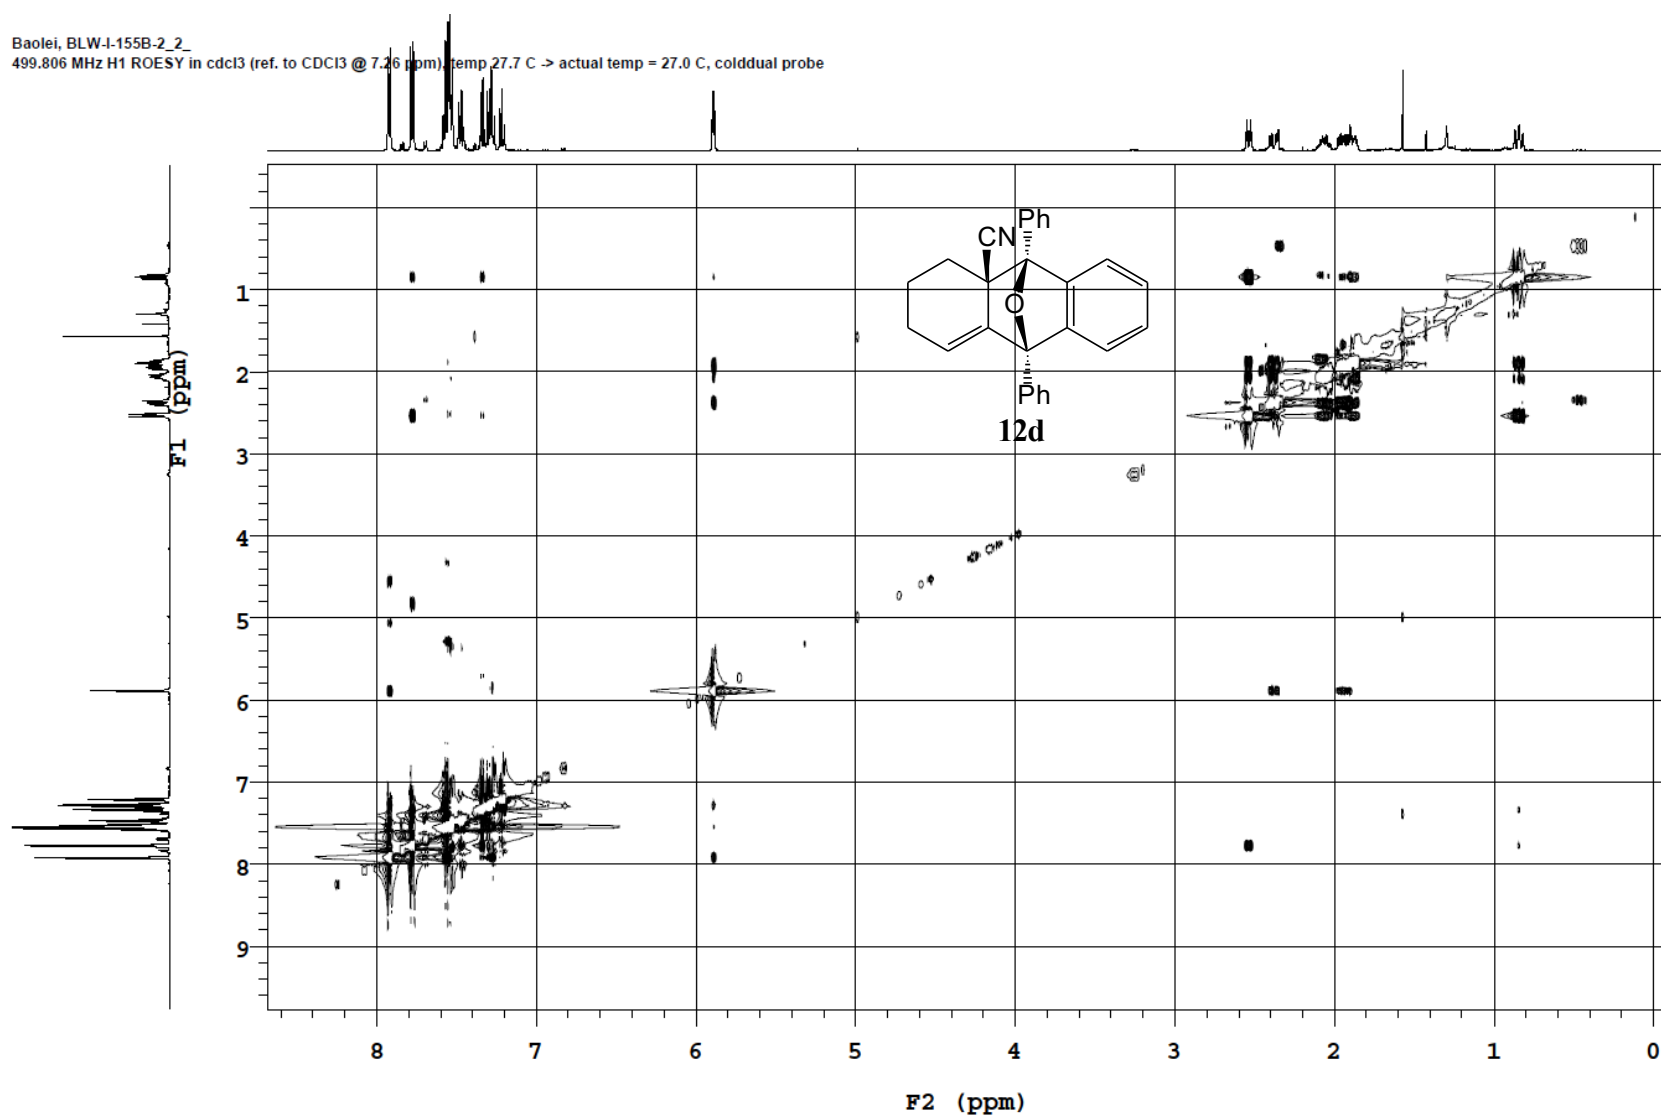

Baolei, BLW-I-155B-1

499.806 MHz H1 PRESAT in cdcl3 (ref. to CDCl3 @ 7.26 ppm), temp 27.7 C -> actual temp = 27.0 C, cold dual probe

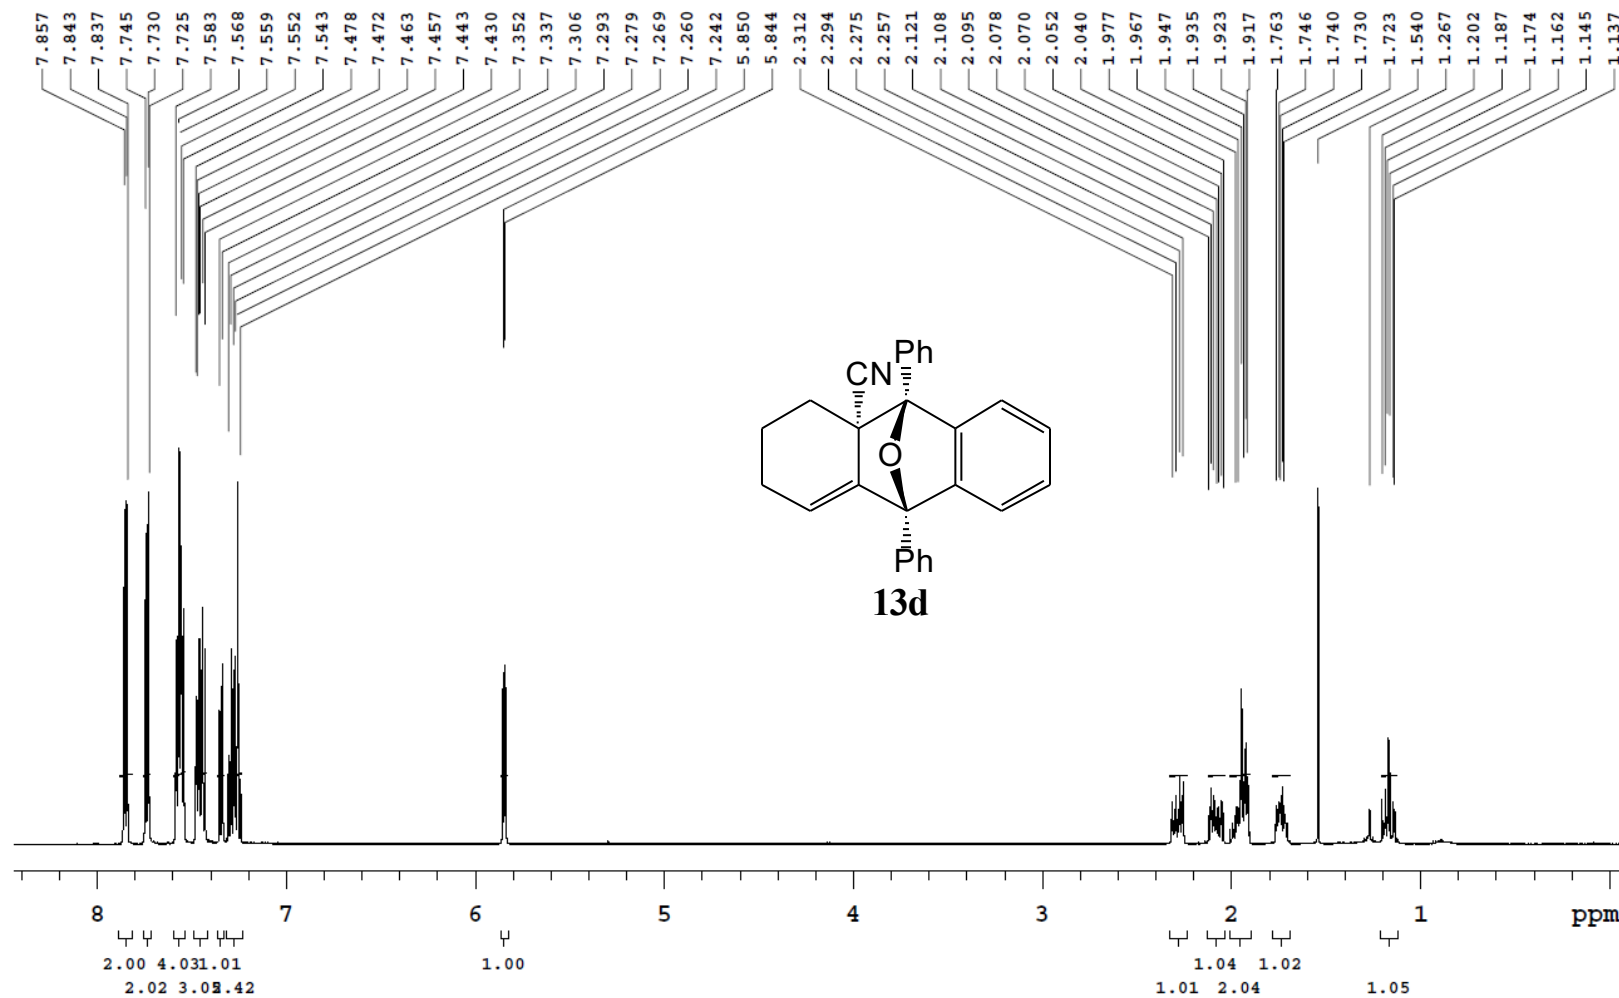

Baolei, BLW-I-155B-1  
125.690 MHz C13[H1] APT\_ad in cdcl3 (ref. to CDC13 @ 77.06 ppm), temp 27.7 C -> actual temp = 27.0 C, cold dual probe  
C & CH2 same, CH & CH3 opposite side of solvent signal

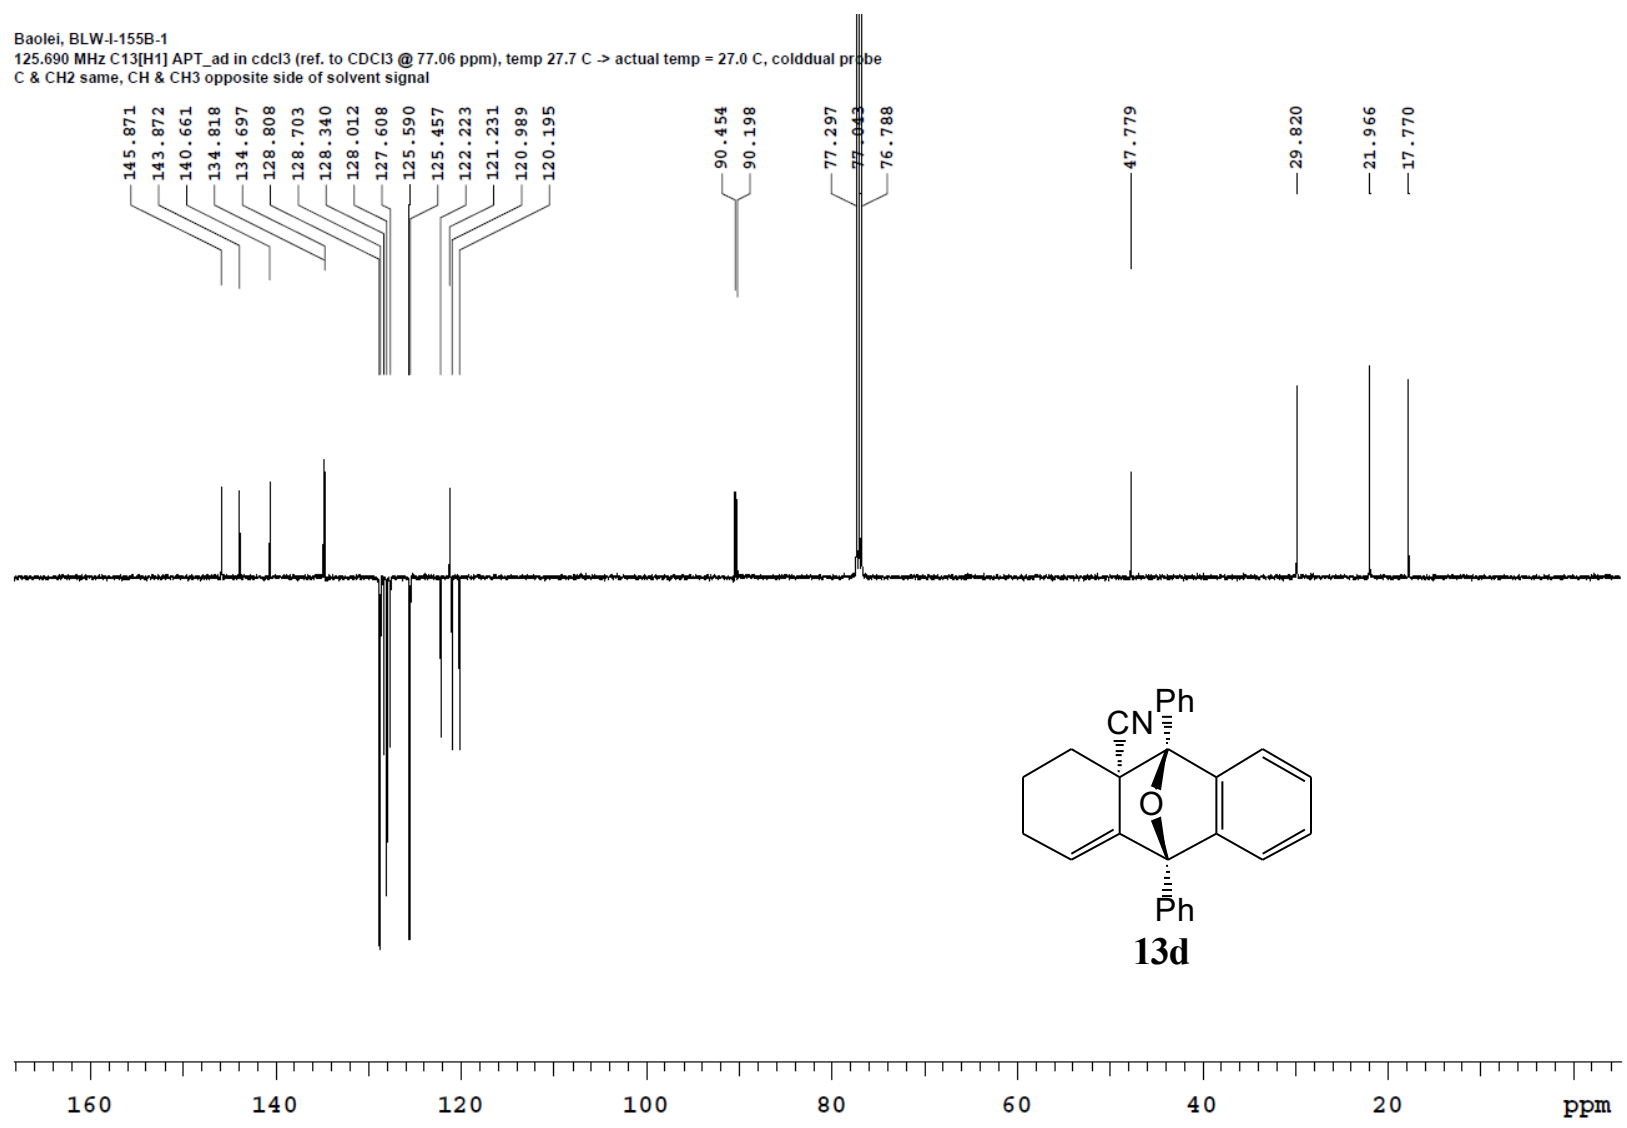

Baolei, BLW-I-155B-1  
499.806 MHz H1 ROESY in cdcl3 (ref. to CDCl3 @ 7.26 ppm), temp 27.7 C -> actual temp = 27.0 C, cold dual probe

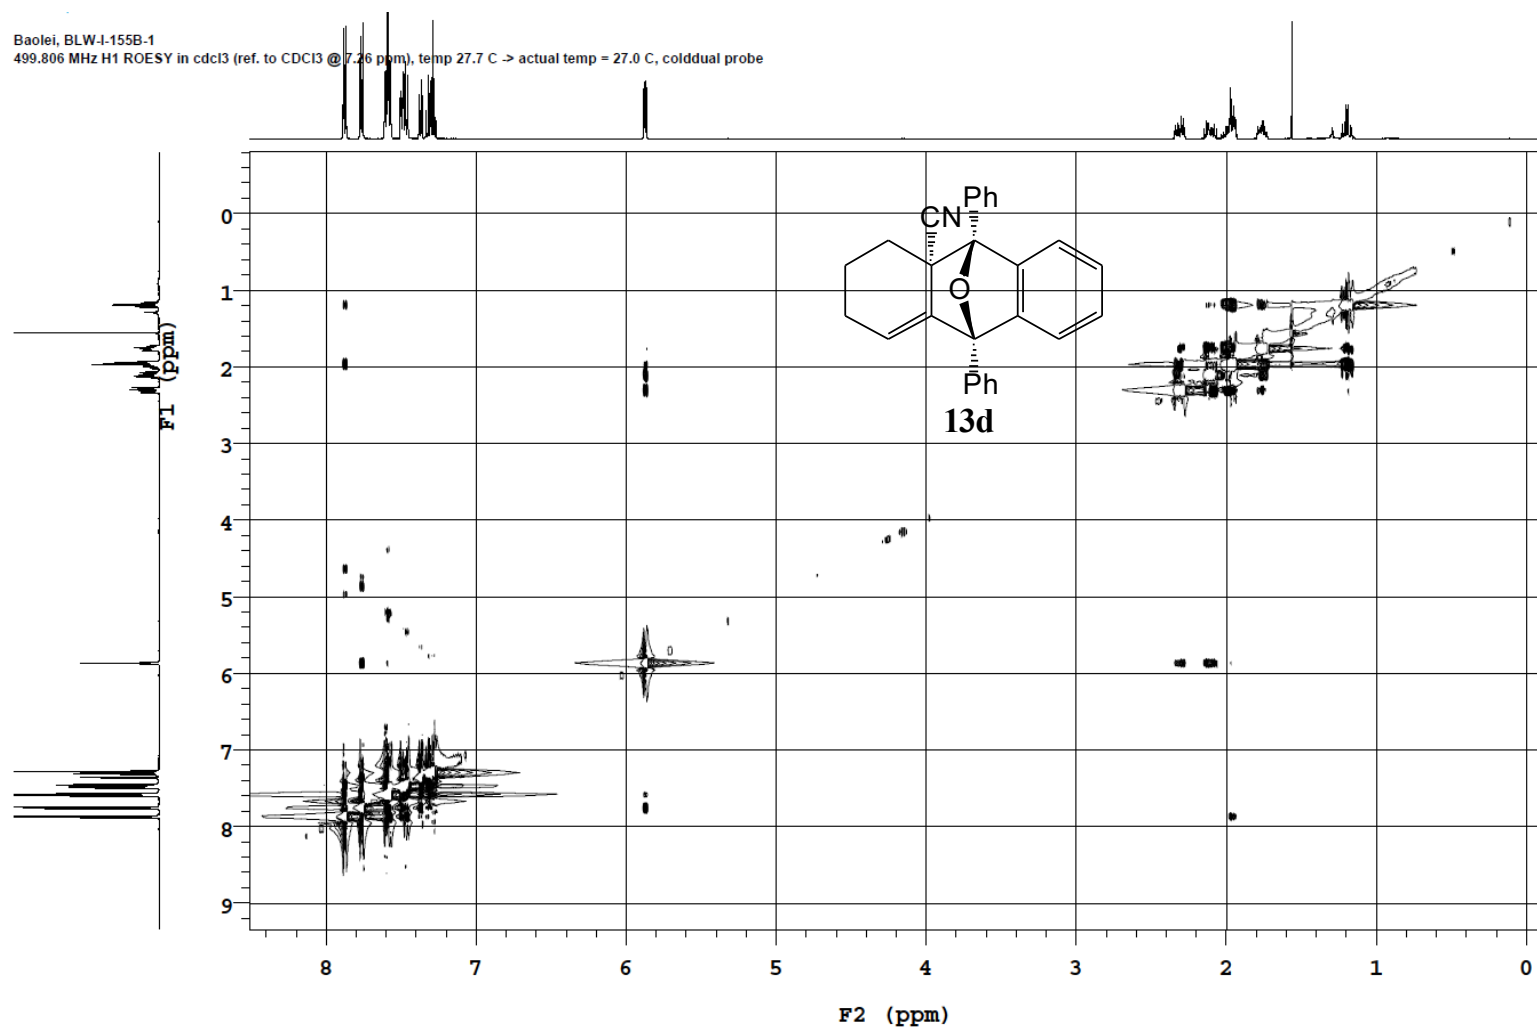

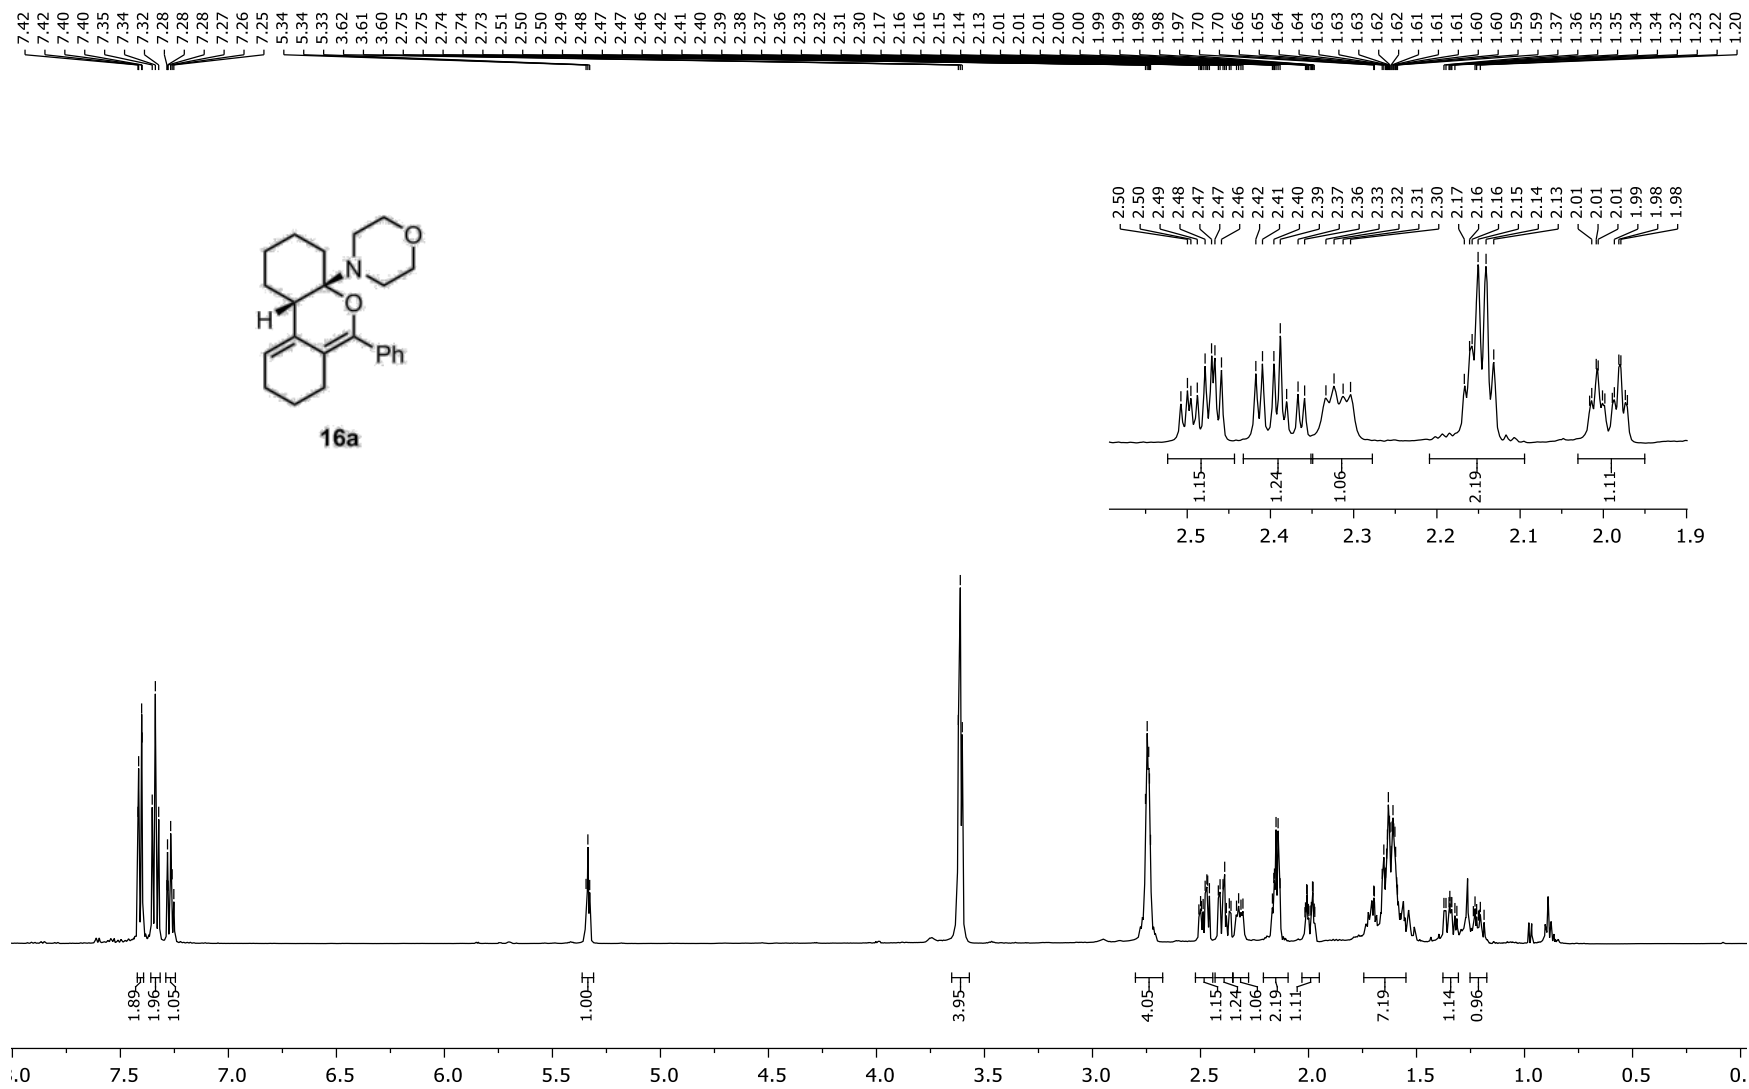

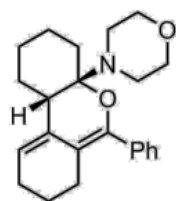

16a

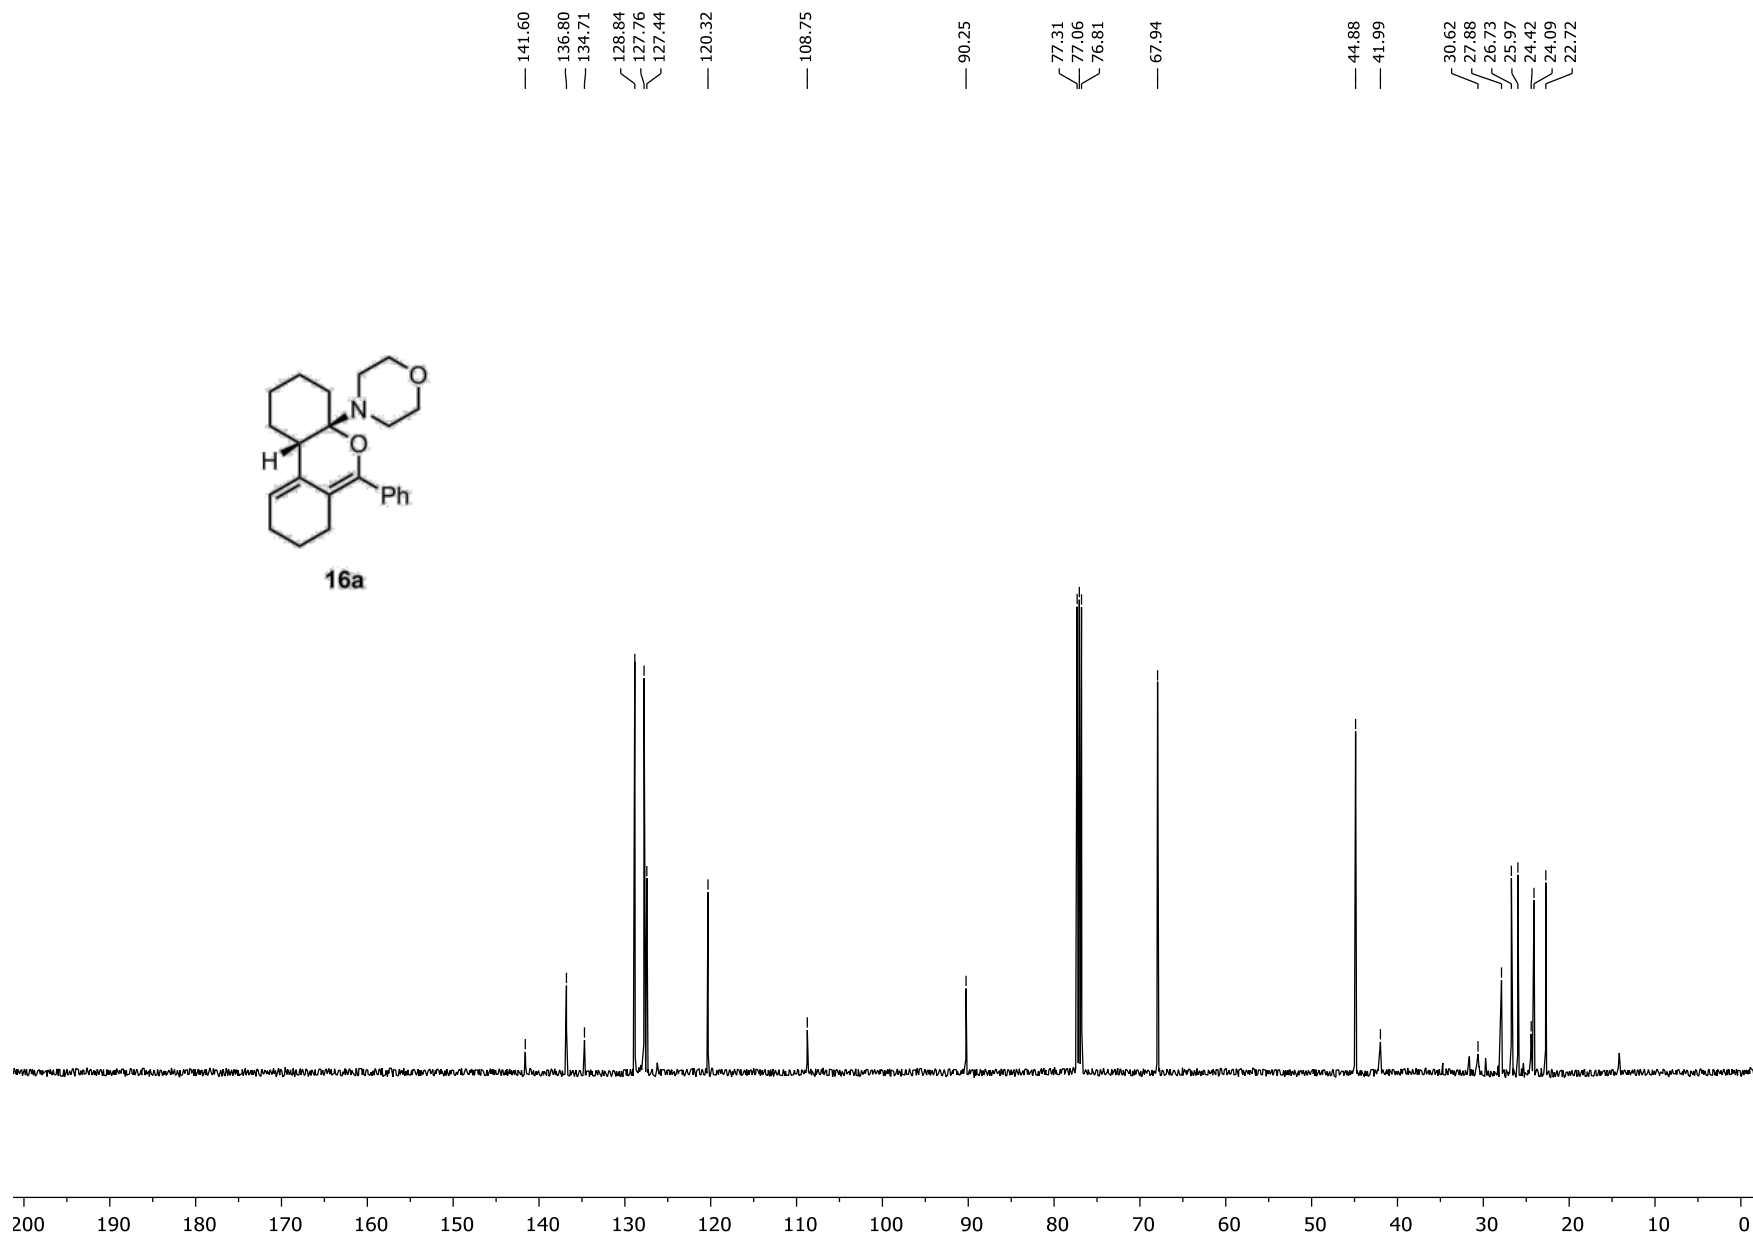



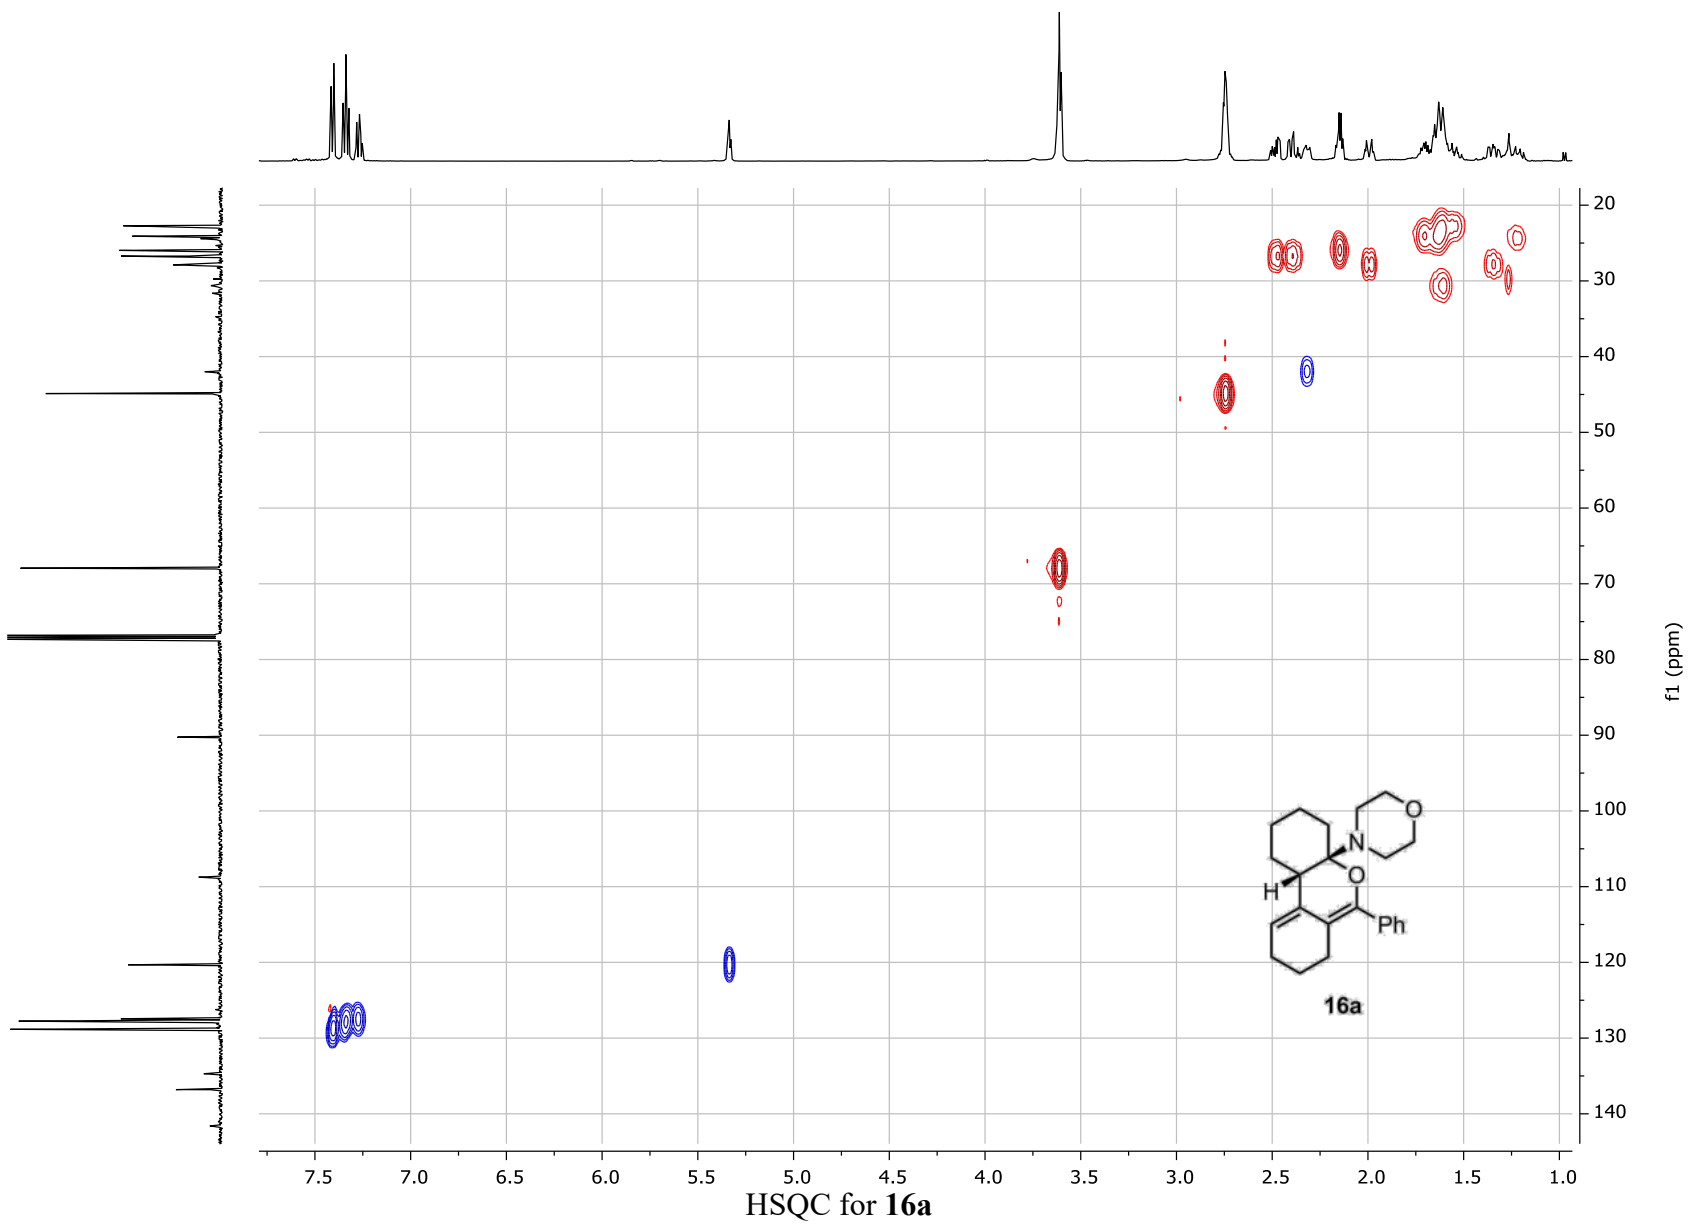

## Department of Chemistry Mass Spectrometry Laboratory

|                      |                     |                        |                   |
|----------------------|---------------------|------------------------|-------------------|
| <b>Name</b>          | M. Constantin, West | <b>Sample Name</b>     | cmi e1            |
| <b>Data Filename</b> | 20031712.d          | <b>Instrument Name</b> | oaTOF6220         |
| <b>Position</b>      | -1                  | <b>Operator</b>        | ami               |
| <b>Acq Method</b>    |                     | <b>DA Method</b>       | da ami low mass.m |

### User Spectra

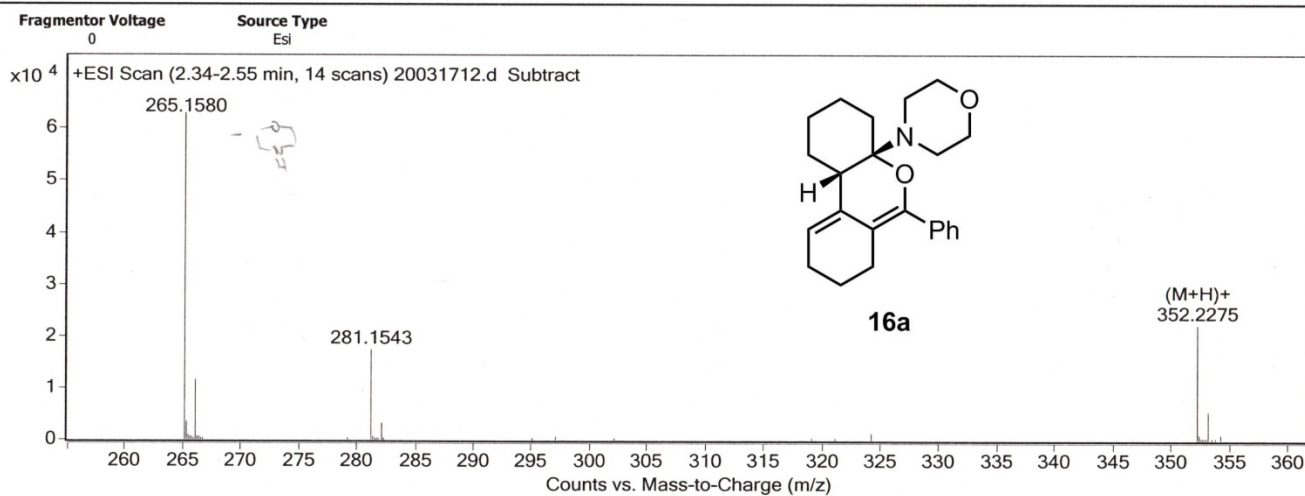

#### Formula Calculator Results

| Formula      | Ion Species  | Mass     | Calc. Mass | m/z      | Calc. m/z | Diff (mDa) | Diff (ppm) | DBE | Ion                | Score |
|--------------|--------------|----------|------------|----------|-----------|------------|------------|-----|--------------------|-------|
| C23 H29 N O2 | C23 H30 N O2 | 351.2202 | 351.2198   | 352.2275 | 352.2271  | -0.38      | -1.08      | 10  | (M+H) <sup>+</sup> | 97.8  |

--- End Of Report ---

7.44  
7.44  
7.44  
7.43  
7.43  
7.42  
7.35  
7.33  
7.33  
7.32  
7.32  
7.28  
7.28  
7.27  
7.26  
7.26  
5.42  
5.41  
5.41  
5.40  
5.40  
3.64  
3.63  
3.62  
2.79  
2.78  
2.77  
2.77  
2.63  
2.62  
2.49  
2.47  
2.46  
2.46  
2.45  
2.45  
2.43  
2.42  
2.41  
2.19  
2.18  
2.18  
2.18  
2.17  
2.17  
2.16  
2.05  
2.03  
2.01  
2.00  
1.87  
1.87  
1.73  
1.72  
1.71  
1.71  
1.69  
1.69  
1.68  
1.68  
1.66  
1.65  
1.64  
1.63  
1.61  
1.60  
1.57  
1.57  
1.56  
1.55  
1.55  
1.54  
1.54  
1.53  
1.50  
1.50  
1.49  
1.49  
1.48  
1.48  
1.47  
1.47  
1.46  
1.34  
1.29  
1.26  
1.26  
1.24  
1.23  
1.21  
1.20

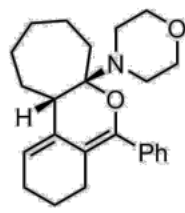

16b

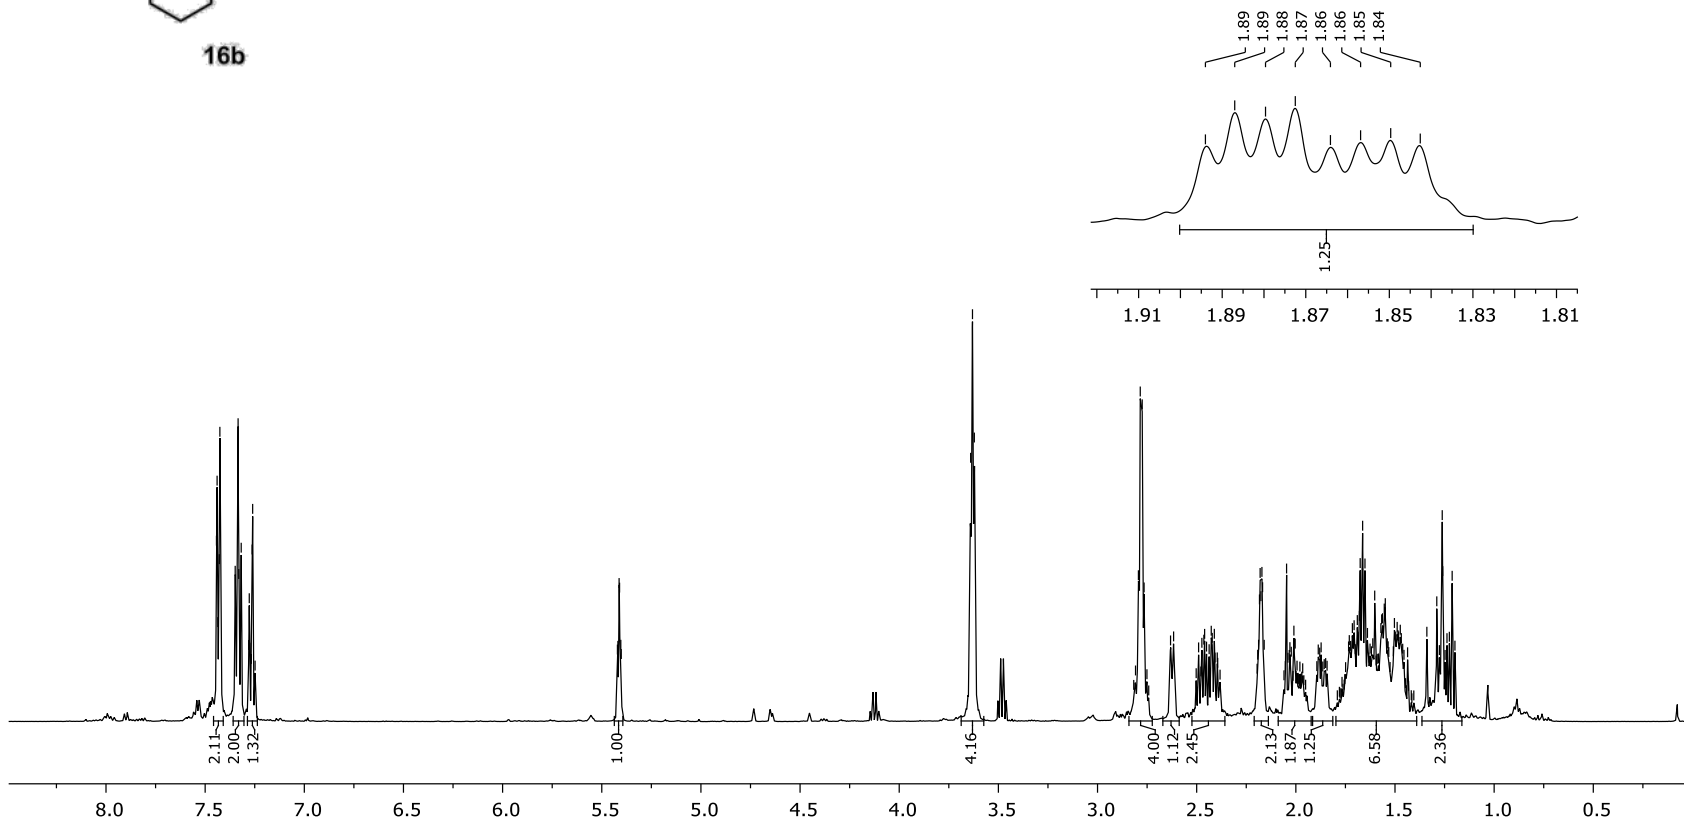

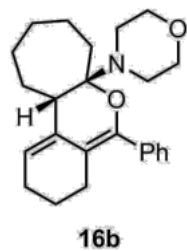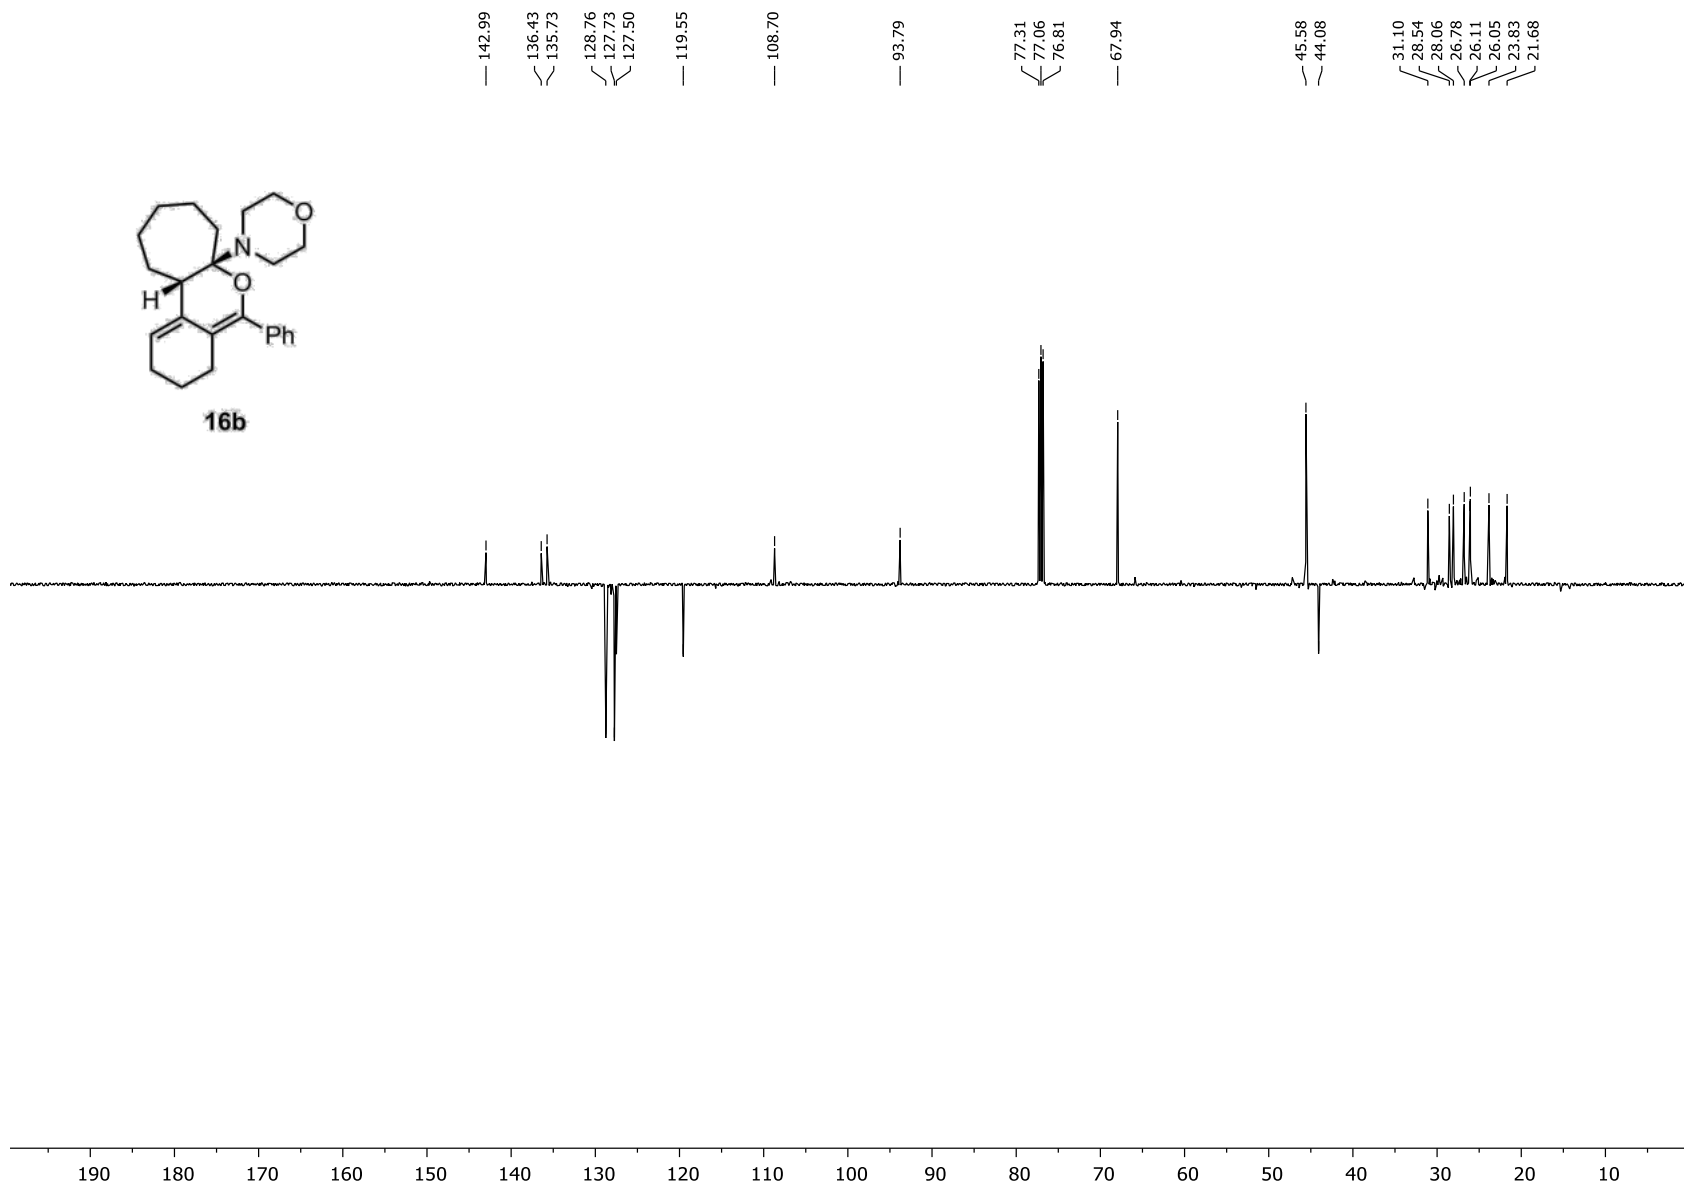

7.44  
7.44  
7.42  
7.42  
7.35  
7.35  
7.33  
7.33  
7.32  
7.28  
7.28  
7.27  
7.27  
7.26  
7.25  
5.47  
5.47  
5.47  
5.46  
5.46  
5.45  
5.45  
3.65  
3.64  
3.63  
3.63  
2.95  
2.95  
2.94  
2.94  
2.93  
2.93  
2.74  
2.73  
2.72  
2.72  
2.72  
2.72  
2.47  
2.46  
2.46  
2.45  
2.45  
2.44  
2.44  
2.44  
2.43  
2.20  
2.19  
2.19  
2.19  
2.18  
2.18  
2.17  
2.17  
1.90  
1.89  
1.88  
1.87  
1.87  
1.85  
1.85  
1.84  
1.84  
1.70  
1.69  
1.68  
1.68  
1.67  
1.67  
1.67  
1.66  
1.66  
1.66  
1.65  
1.65  
1.65  
1.64  
1.64  
1.64  
1.63  
1.63  
1.63  
1.62  
1.62  
1.11  
1.11  
1.10  
0.96  
0.94  
0.93

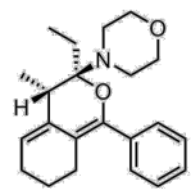

16c

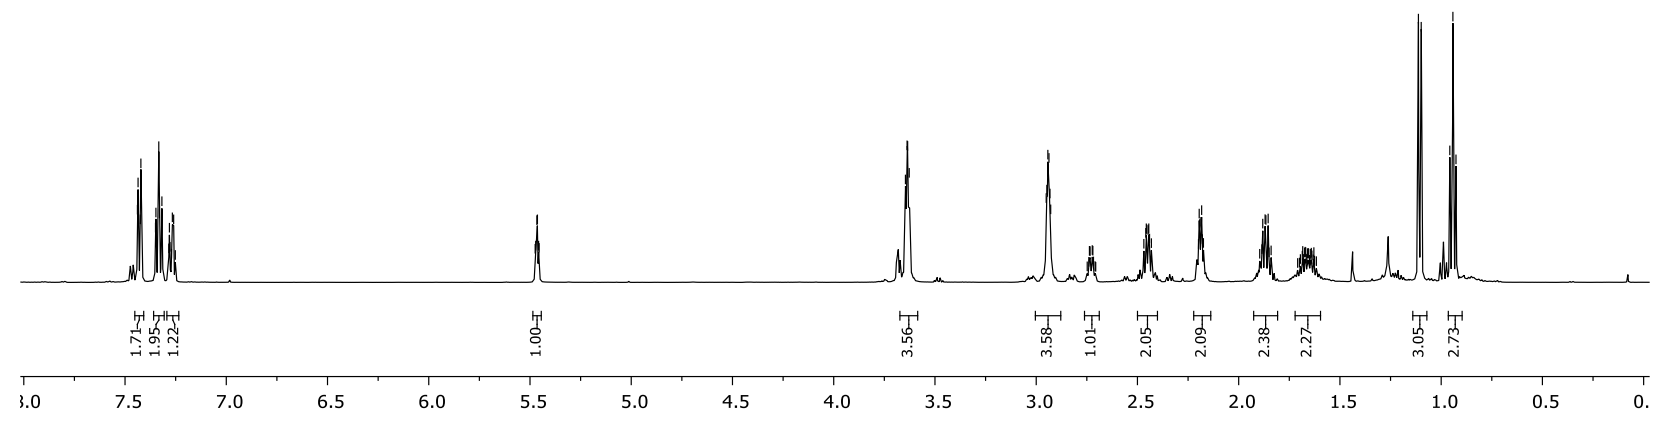

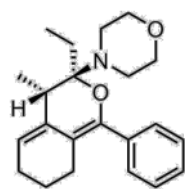

16c

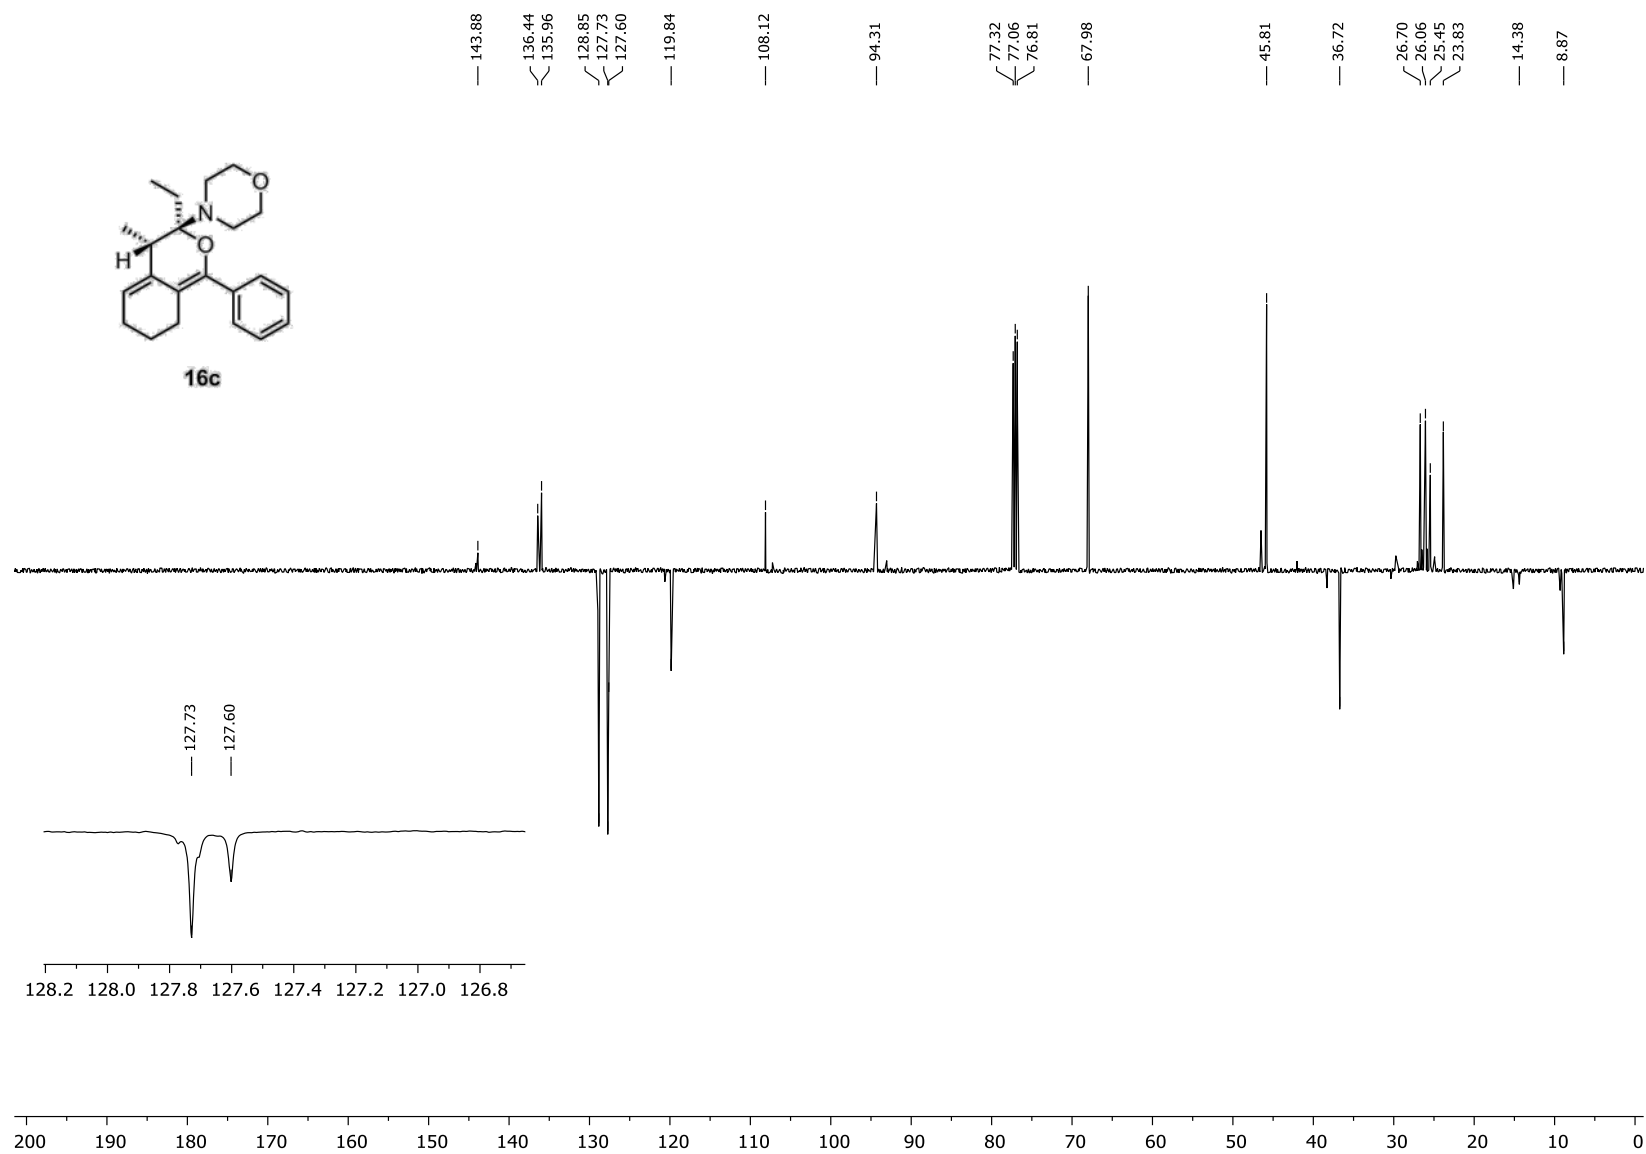

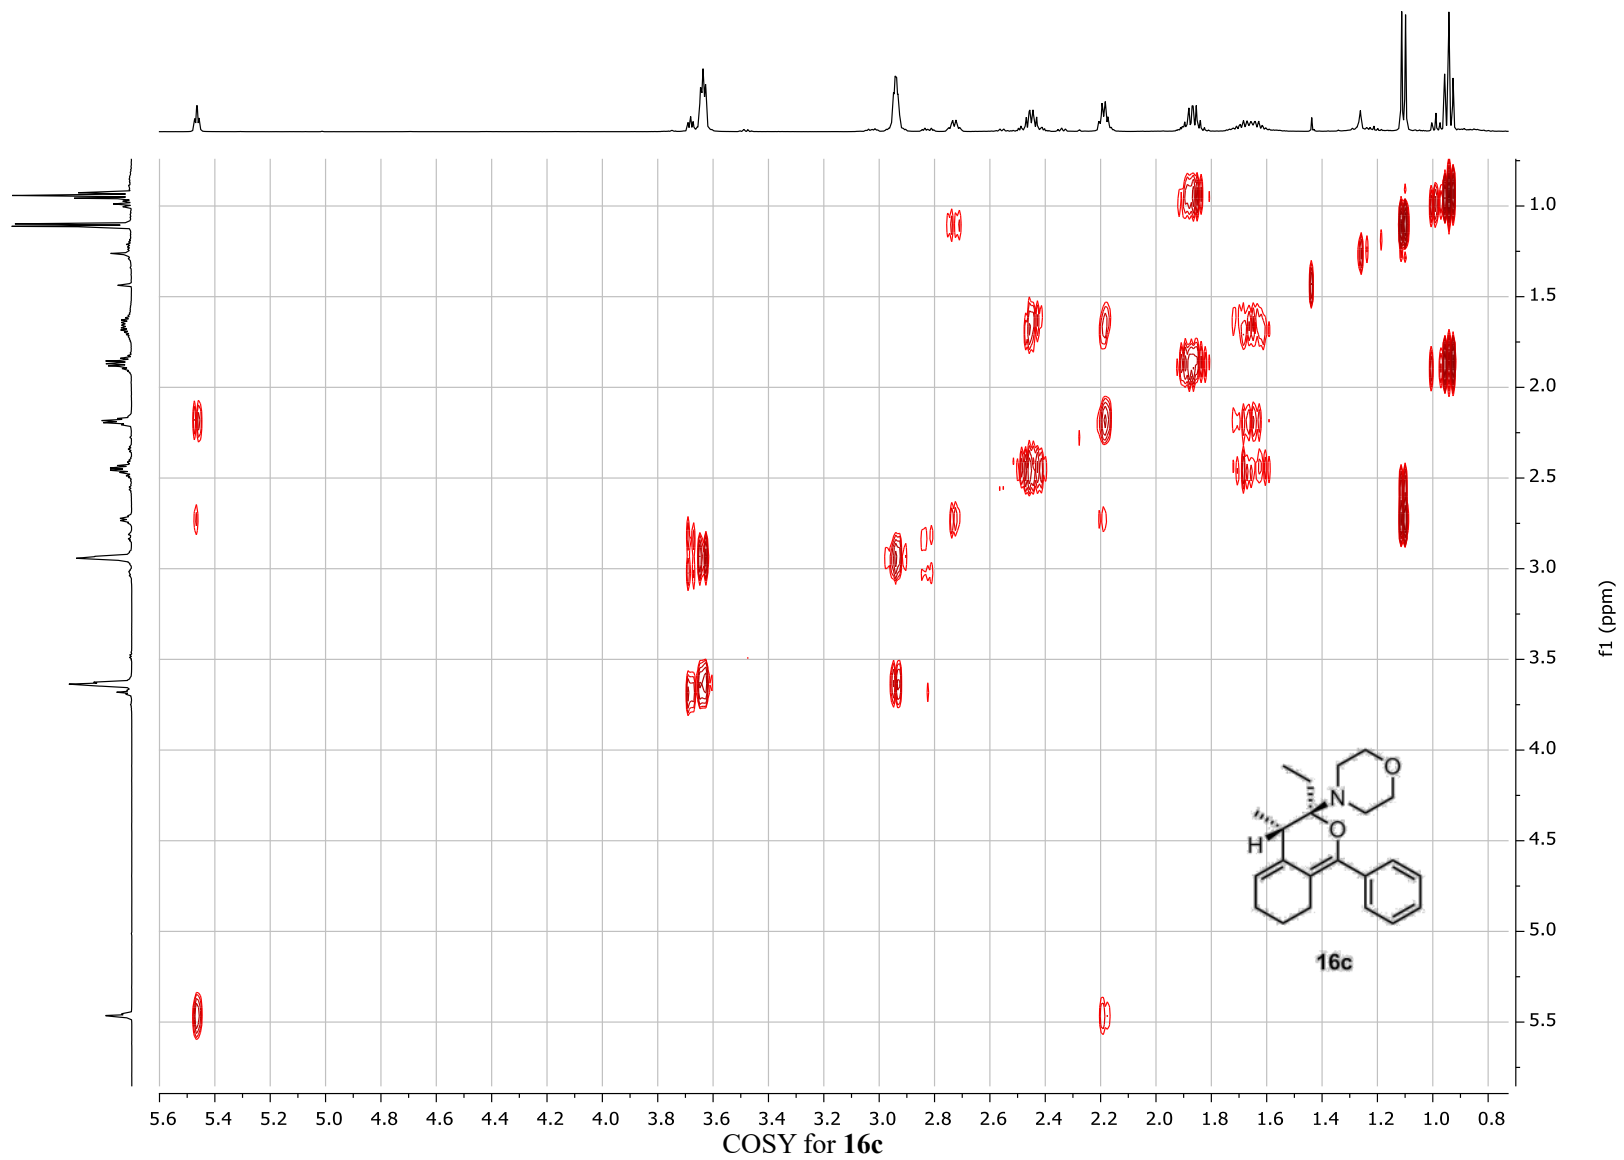

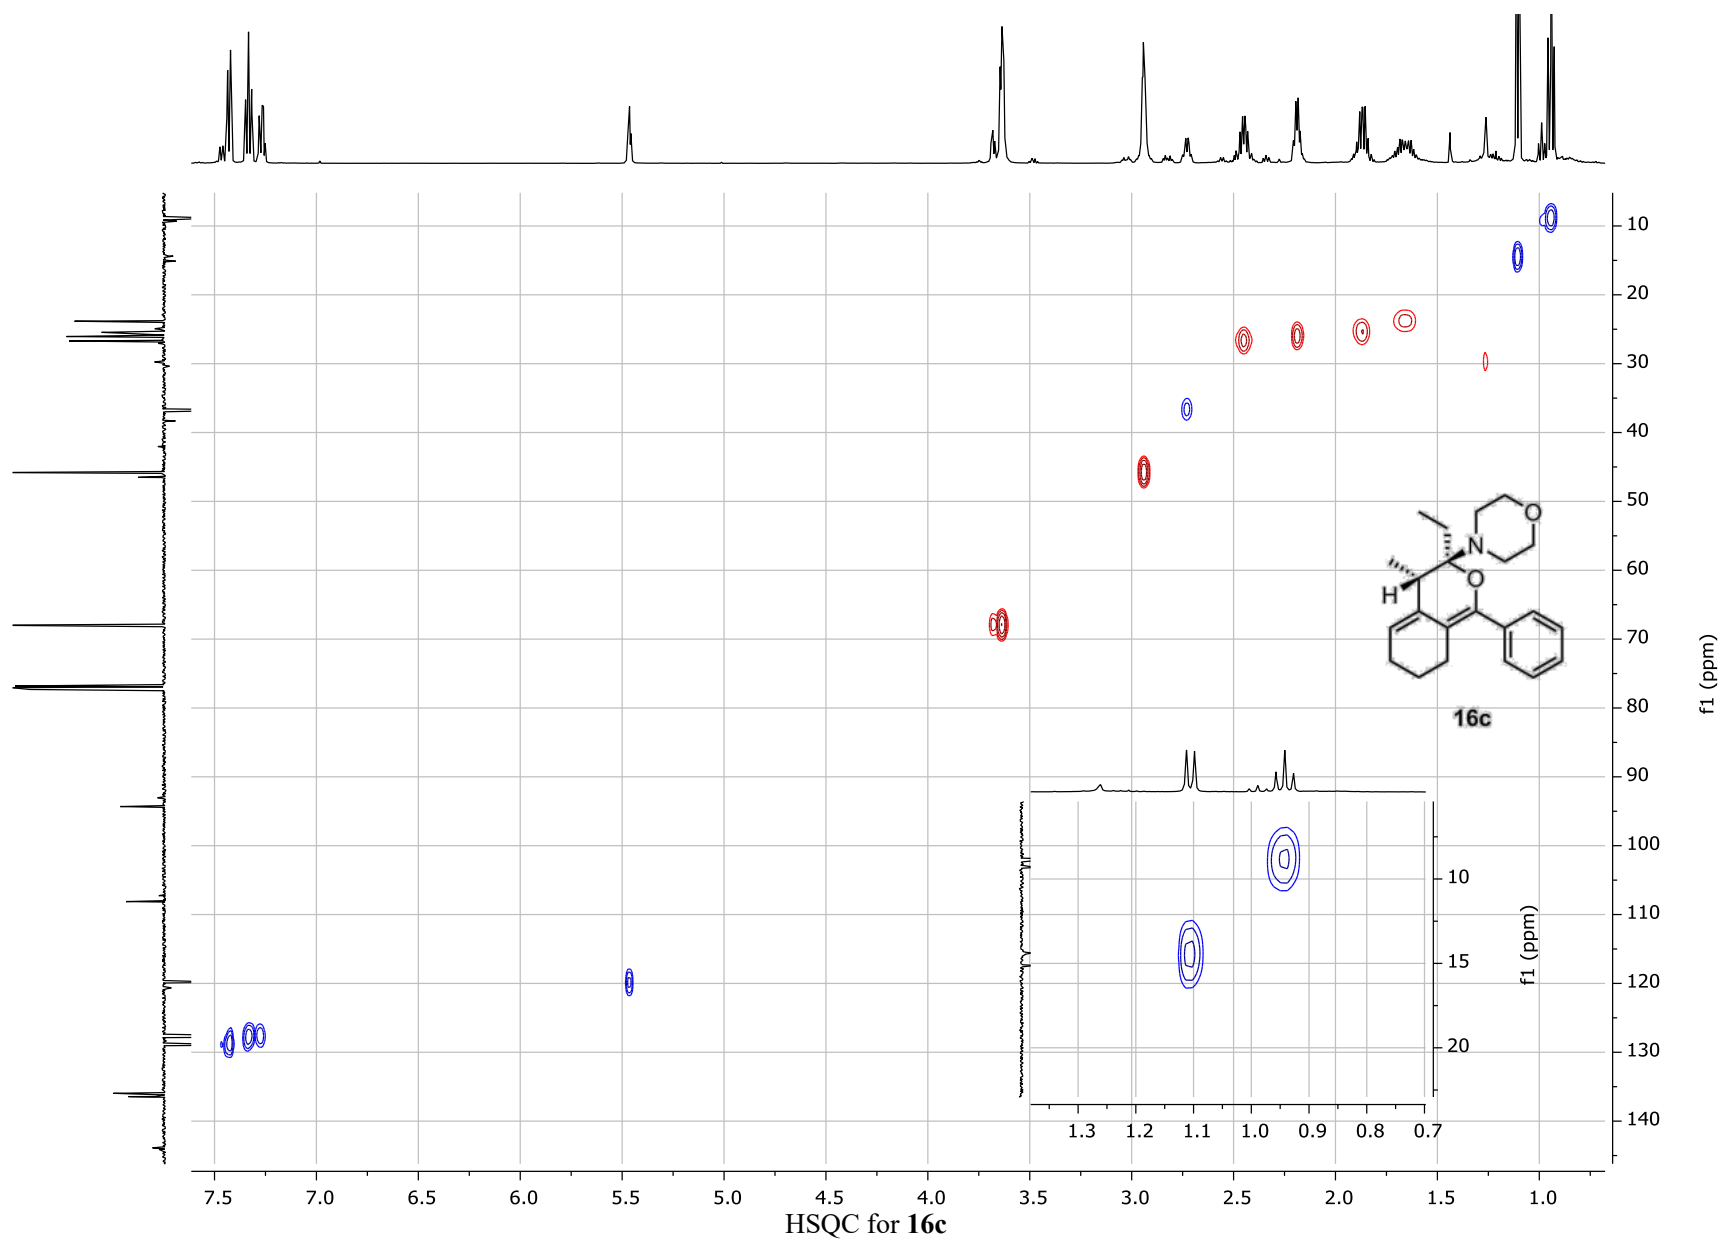



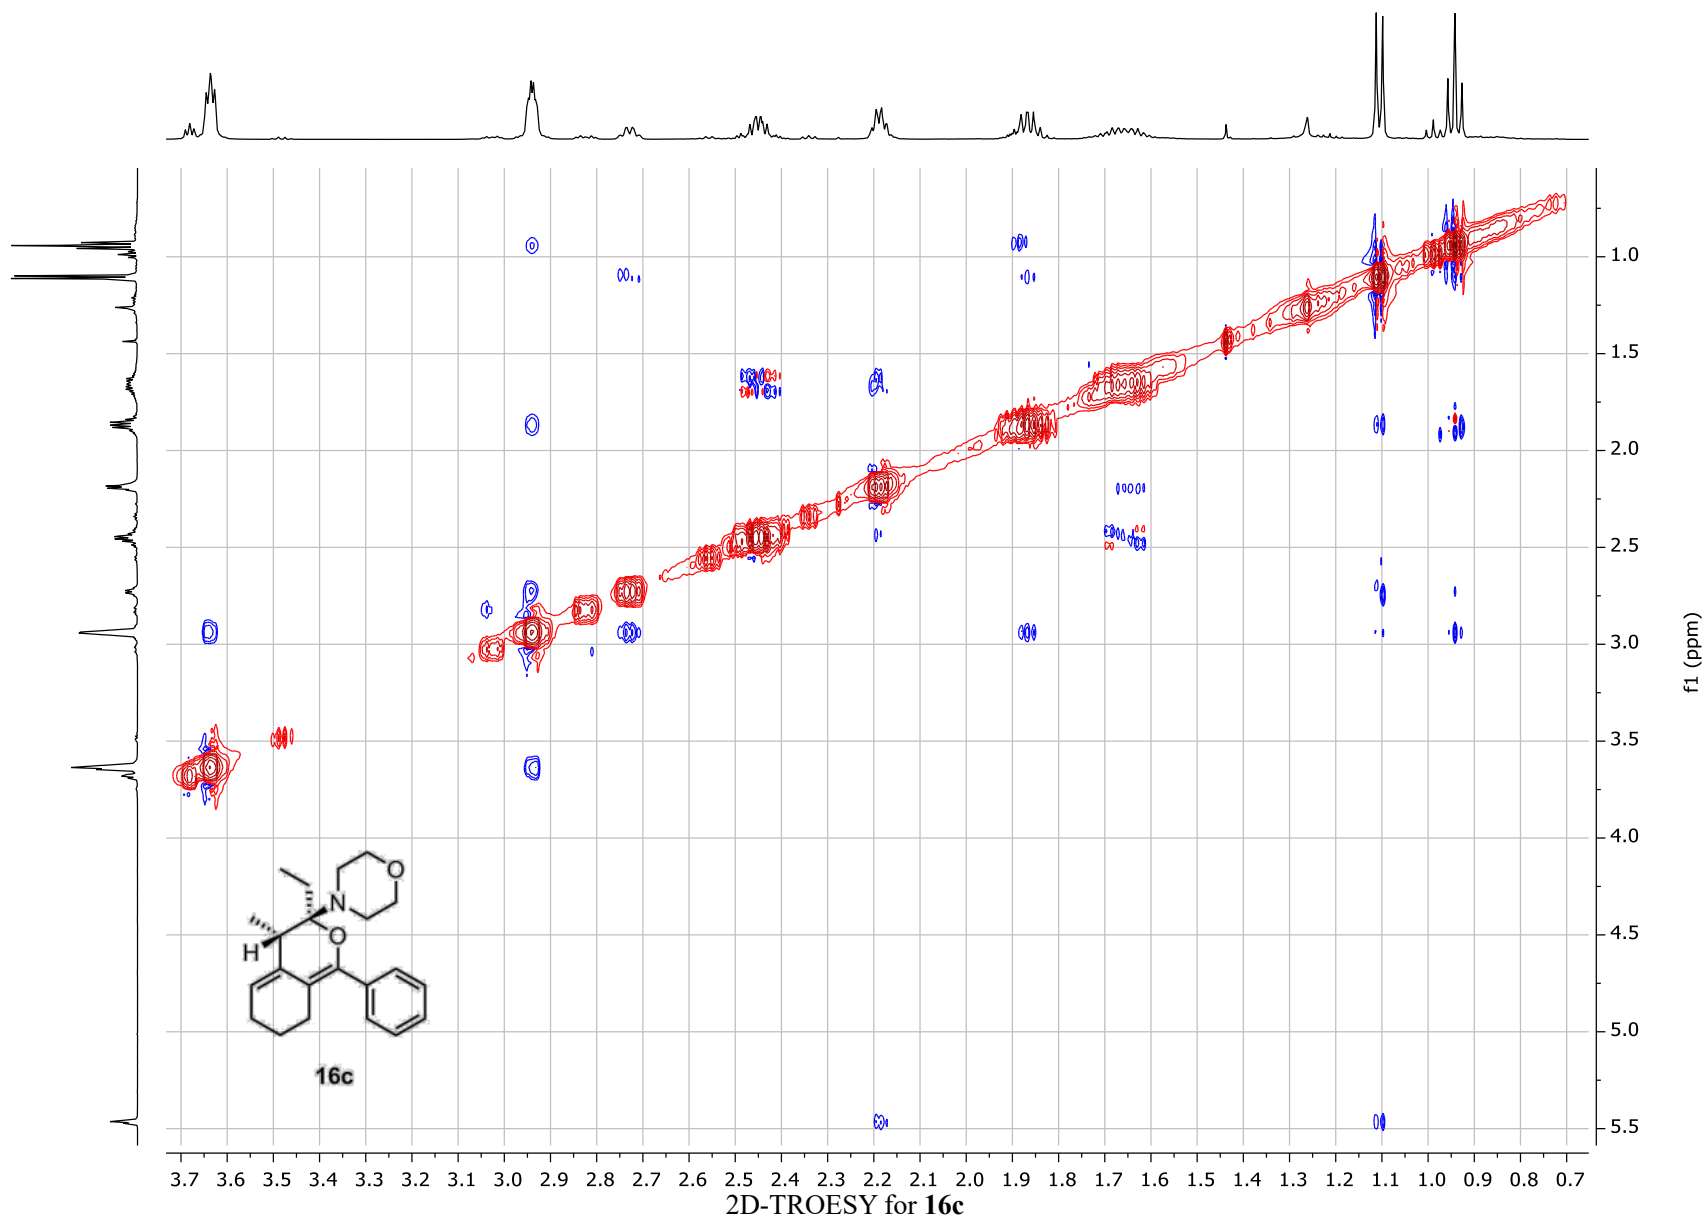

7.53  
7.53  
7.52  
7.51  
7.51  
7.38  
7.38  
7.37  
7.36  
7.36  
7.35  
7.35  
7.32  
7.32  
7.31  
7.31  
7.30  
7.30  
7.29  
7.29  
5.59  
5.58  
5.57  
4.26  
3.68  
3.66  
3.66  
3.65  
3.65  
3.64  
3.64  
3.64  
3.64  
3.23  
3.23  
3.22  
3.22  
3.22  
3.21  
3.21  
3.21  
3.20  
3.20  
3.19  
3.19  
3.18  
2.74  
2.73  
2.72  
2.71  
2.71  
2.70  
2.69  
2.69  
2.42  
2.41  
2.41  
2.40  
2.39  
2.38  
2.37  
2.36  
2.18  
2.17  
2.17  
2.16  
2.16  
2.16  
2.15  
2.15  
2.14  
2.14  
1.70  
1.69  
1.69  
1.68  
1.68  
1.67  
1.66  
1.65  
1.65  
1.49  
1.49  
1.49  
1.48  
1.48  
1.47  
1.47  
1.21  
1.18

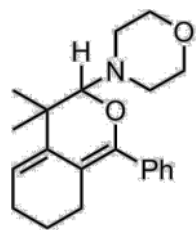

**16d**

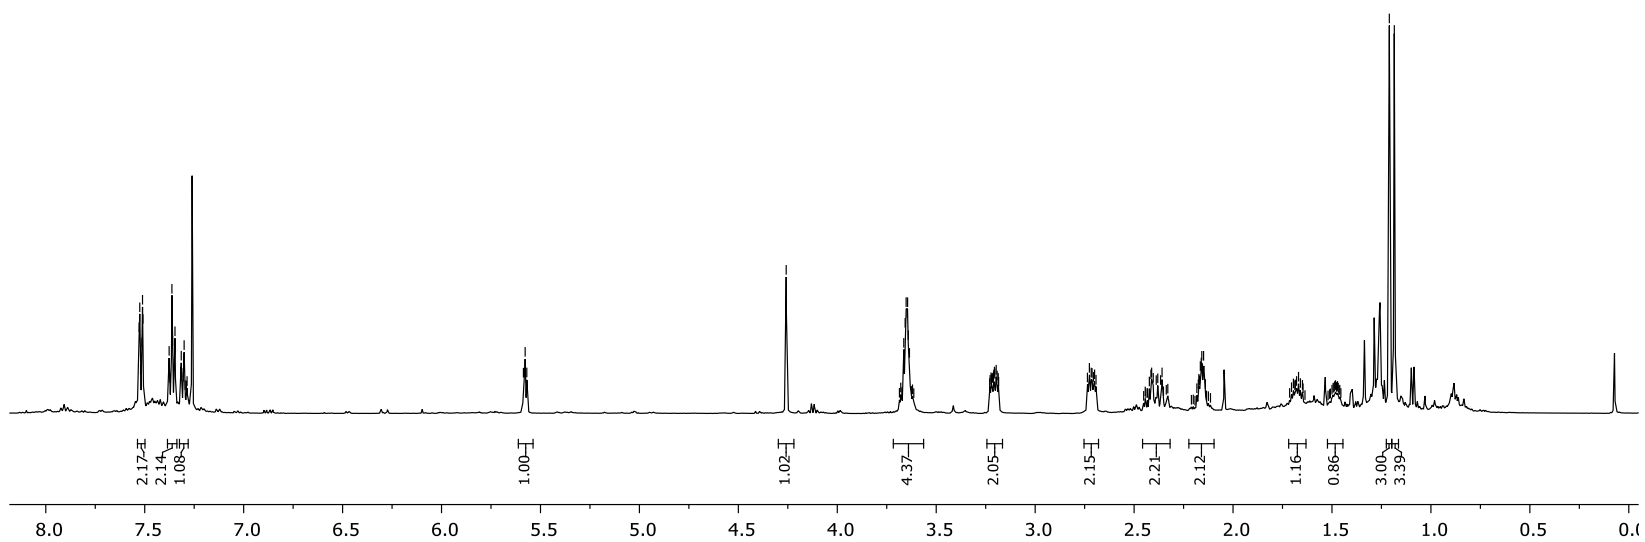

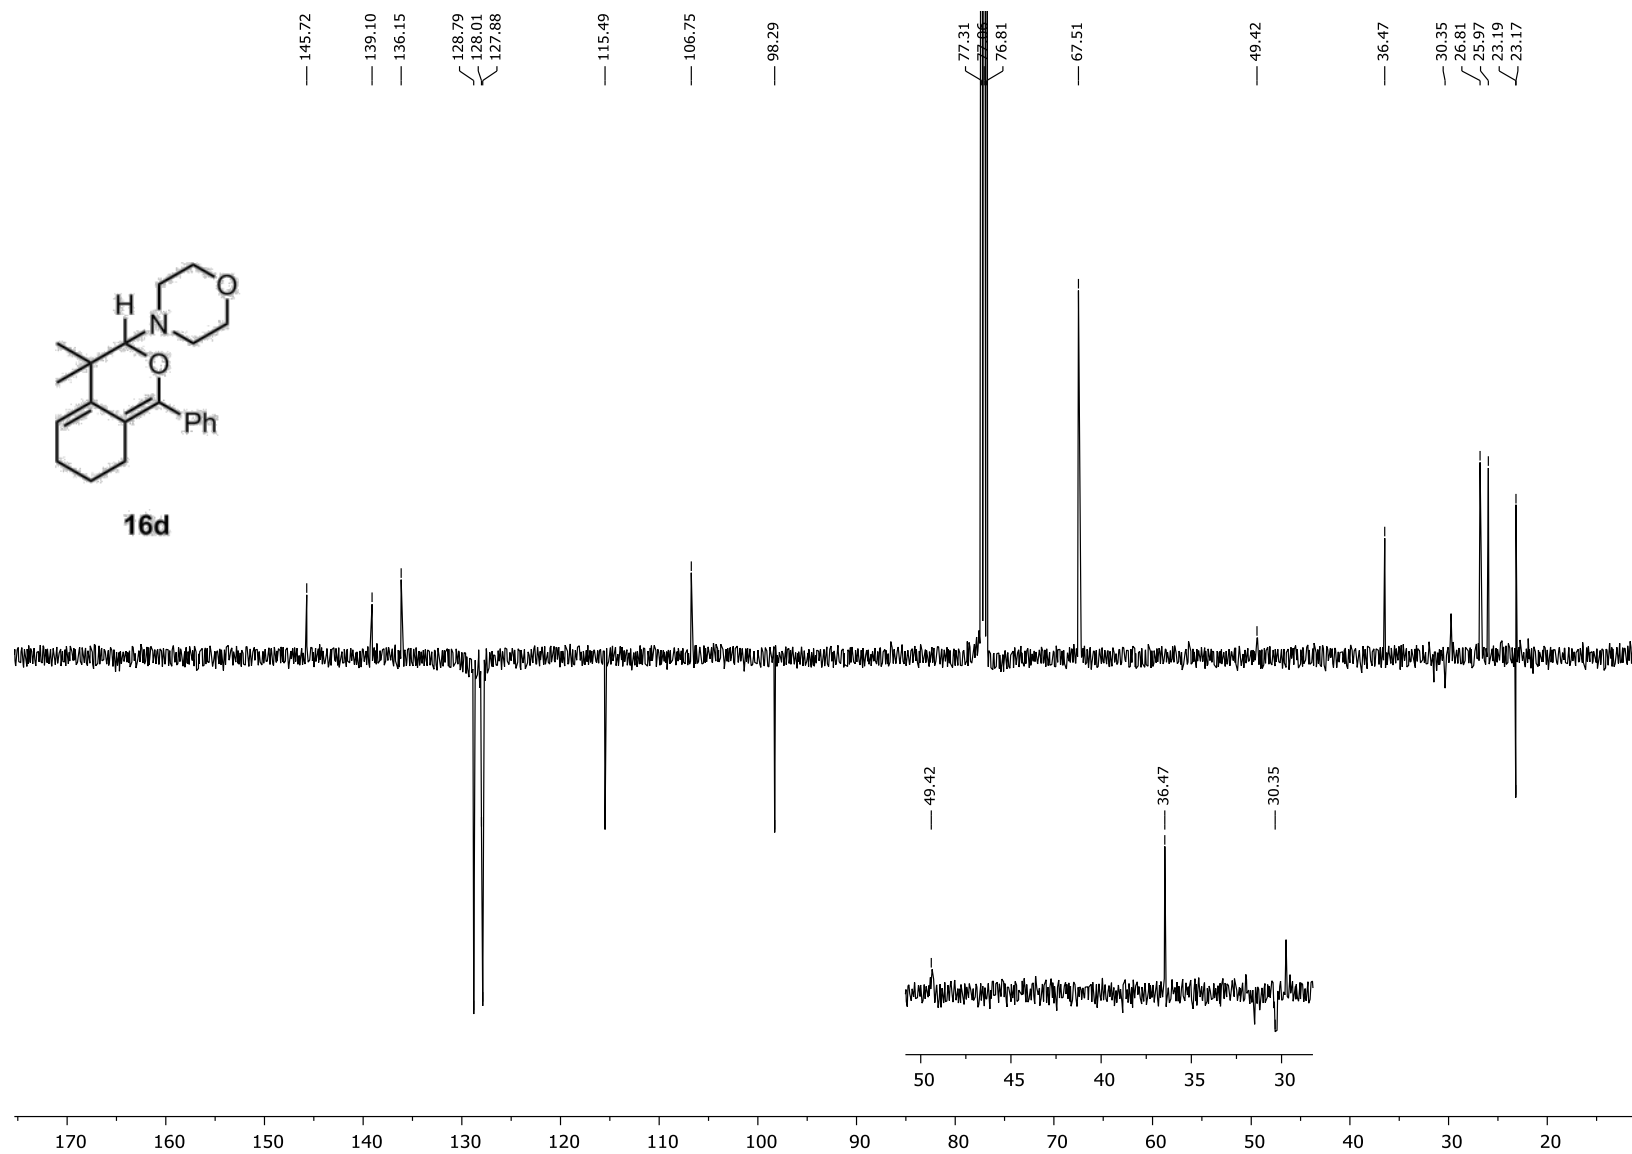

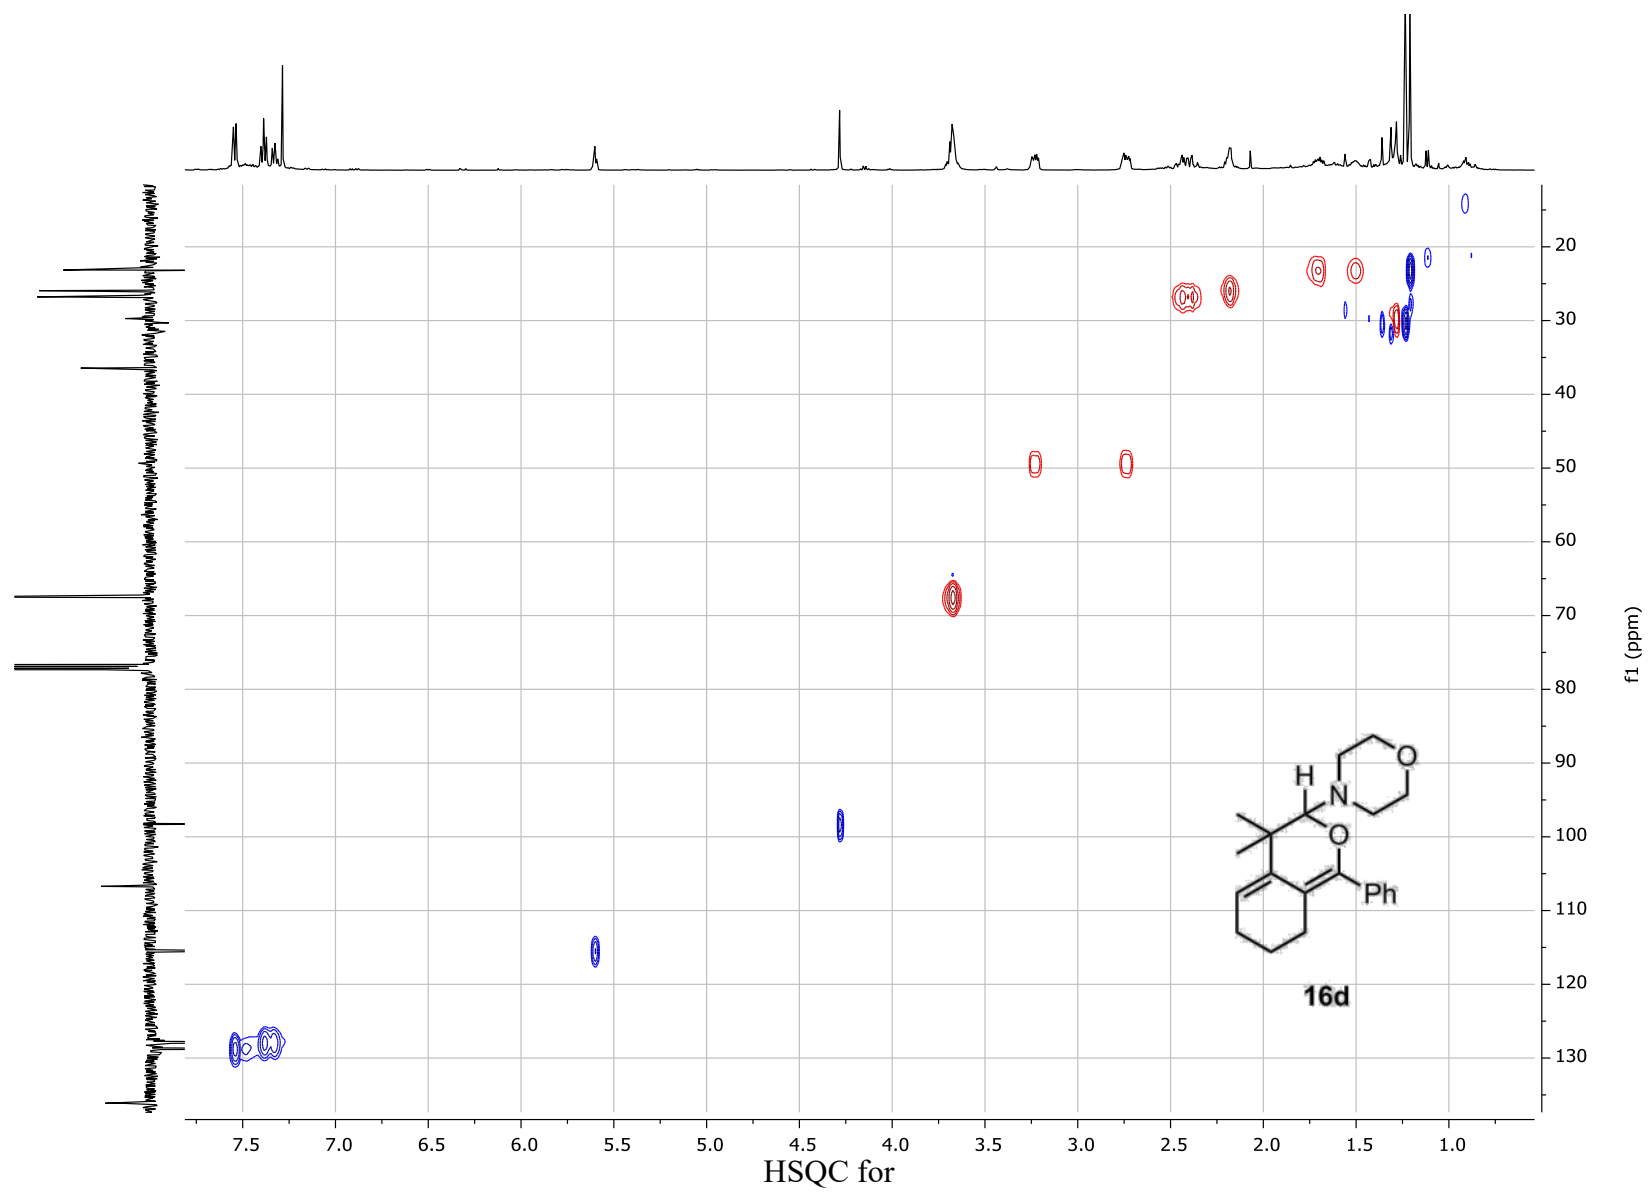

7.34  
7.34  
7.33  
7.33  
7.32  
7.32  
7.30  
7.30  
7.29  
7.28  
5.36  
5.36  
5.35  
5.35  
3.60  
3.60  
3.59  
3.59  
2.76  
2.76  
2.75  
2.75  
2.74  
2.74  
2.73  
2.73  
2.72  
2.72  
2.71  
2.71  
2.70  
2.70  
2.69  
2.69  
2.68  
2.68  
2.67  
2.67  
2.46  
2.46  
2.44  
2.44  
2.43  
2.43  
2.42  
2.42  
2.39  
2.39  
2.38  
2.38  
2.37  
2.37  
2.36  
2.36  
2.34  
2.34  
2.33  
2.33  
2.31  
2.31  
2.30  
2.30  
2.16  
2.16  
2.15  
2.15  
2.14  
2.14  
2.13  
2.13  
2.00  
2.00  
1.99  
1.99  
1.98  
1.98  
1.97  
1.97  
1.96  
1.96  
1.95  
1.95  
1.72  
1.72  
1.71  
1.71  
1.71  
1.71  
1.70  
1.70  
1.69  
1.69  
1.68  
1.68  
1.66  
1.66  
1.65  
1.65  
1.64  
1.64  
1.63  
1.63  
1.62  
1.62  
1.61  
1.61  
1.61  
1.61  
1.59  
1.59  
1.58  
1.58  
1.57  
1.57  
1.53  
1.53  
1.51  
1.51  
1.37  
1.37  
1.36  
1.36  
1.34  
1.34  
1.33  
1.33  
1.33  
1.33  
1.26  
1.26  
1.22  
1.22  
1.21  
1.21  
1.19  
1.19

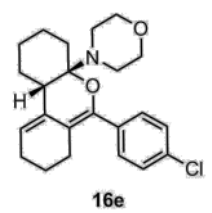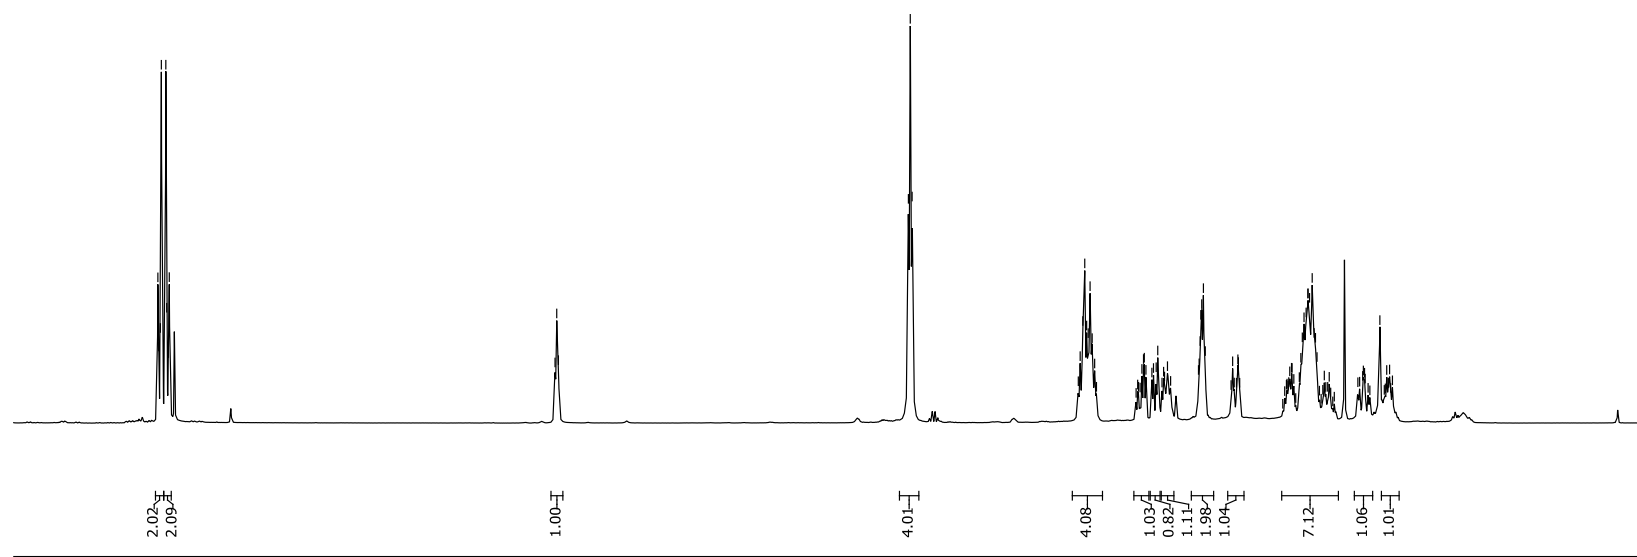

**16d**

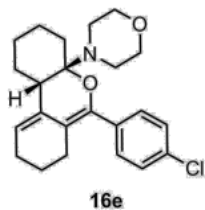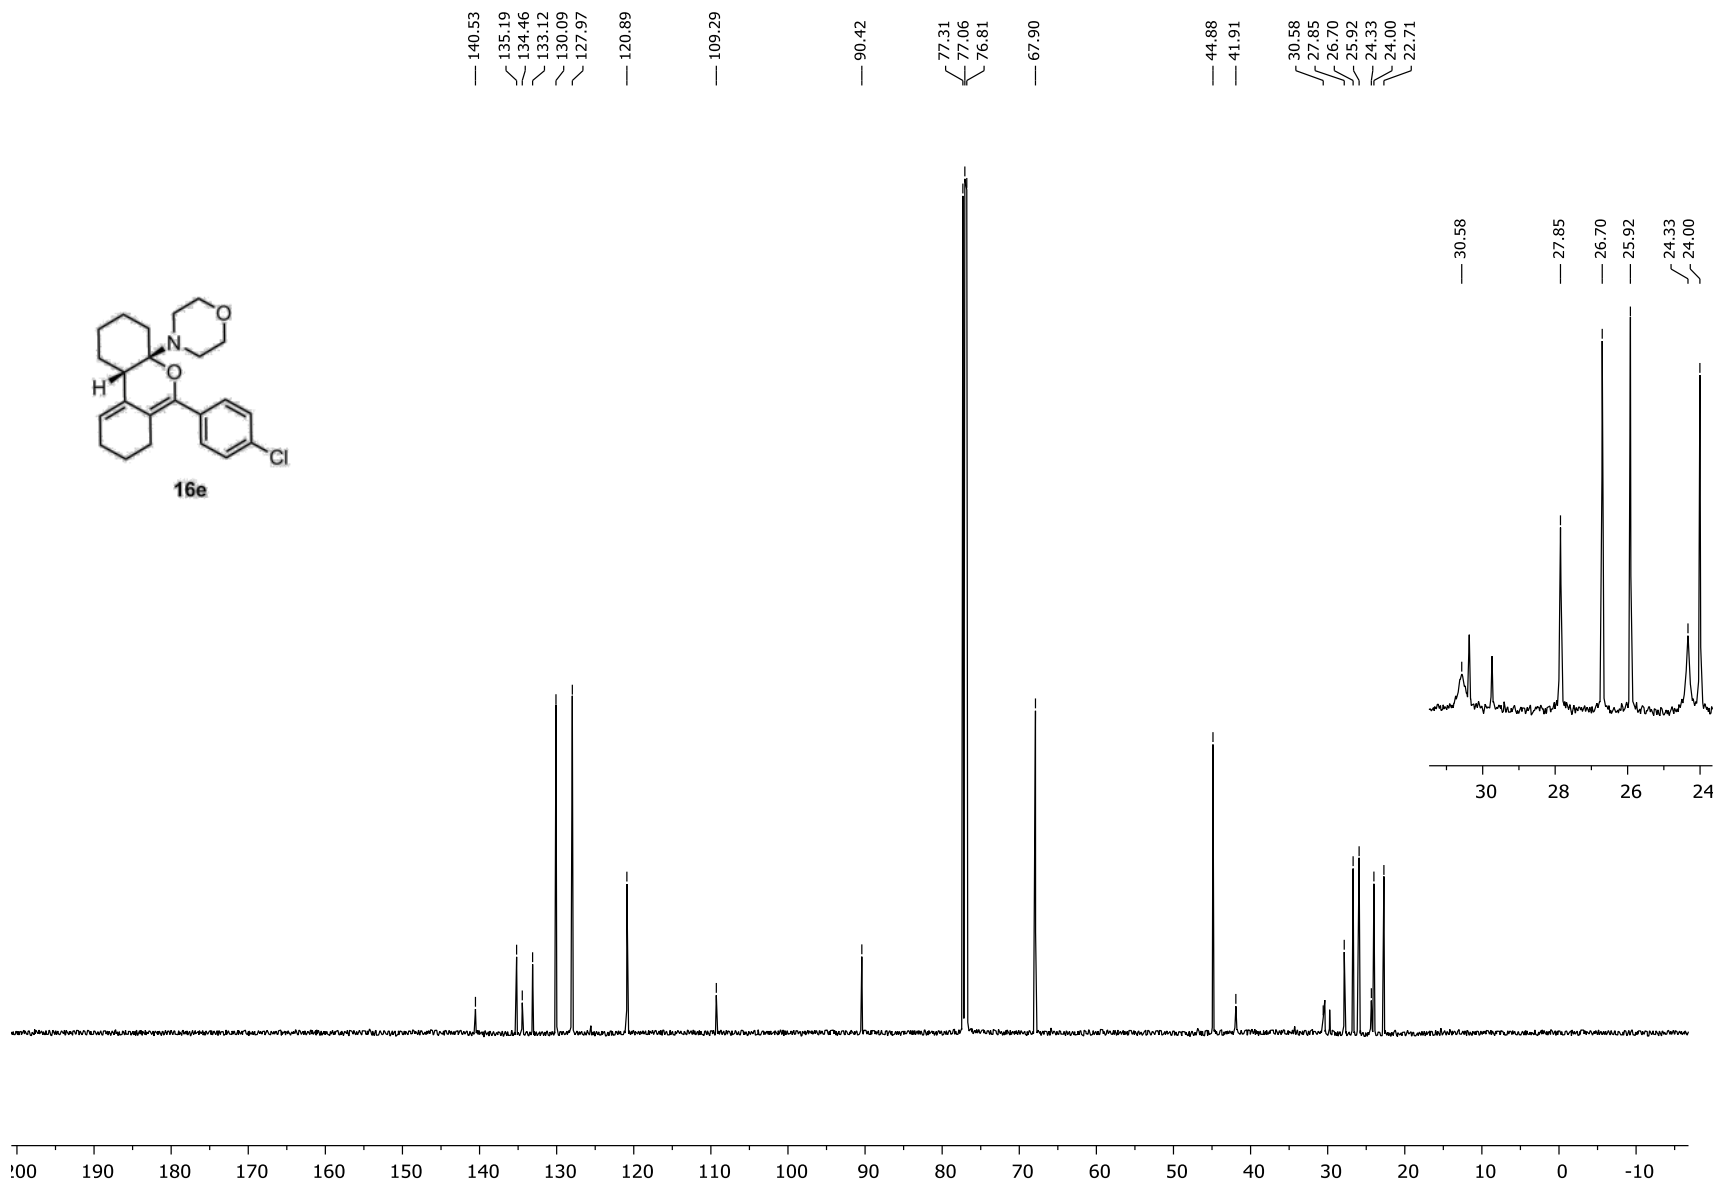

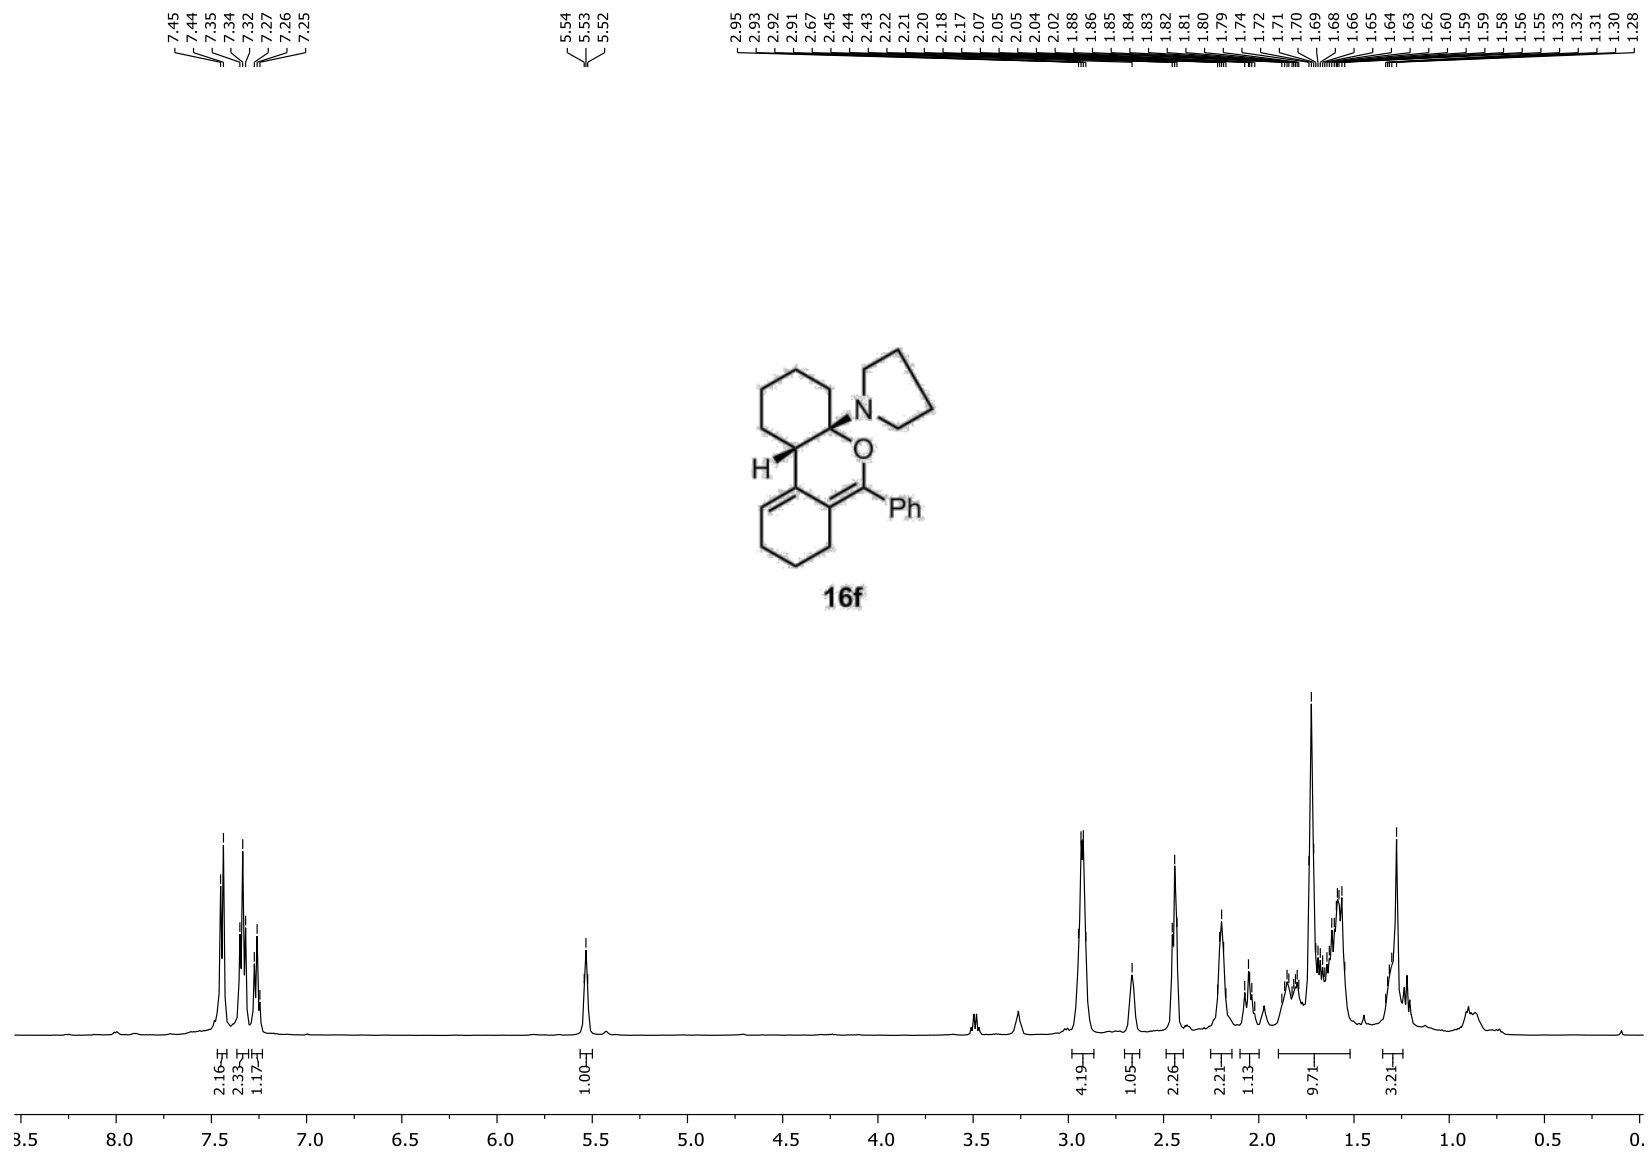

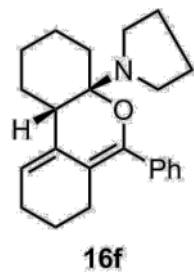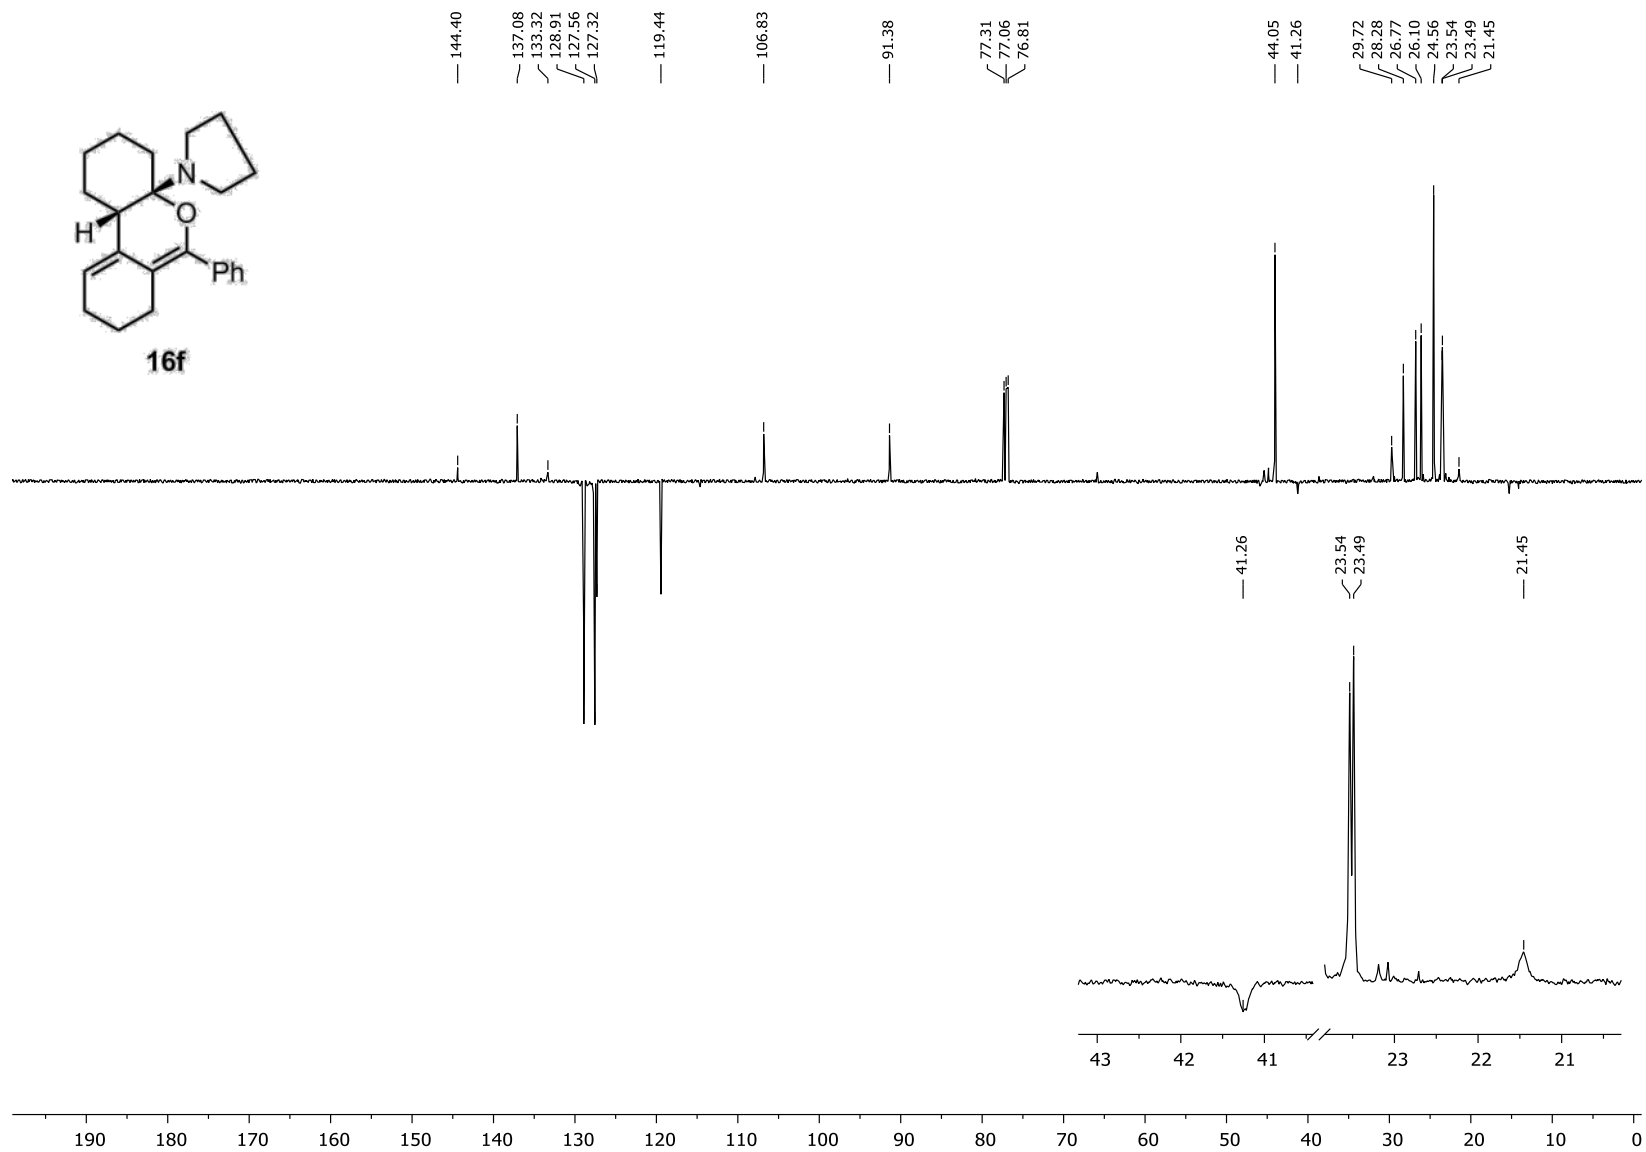



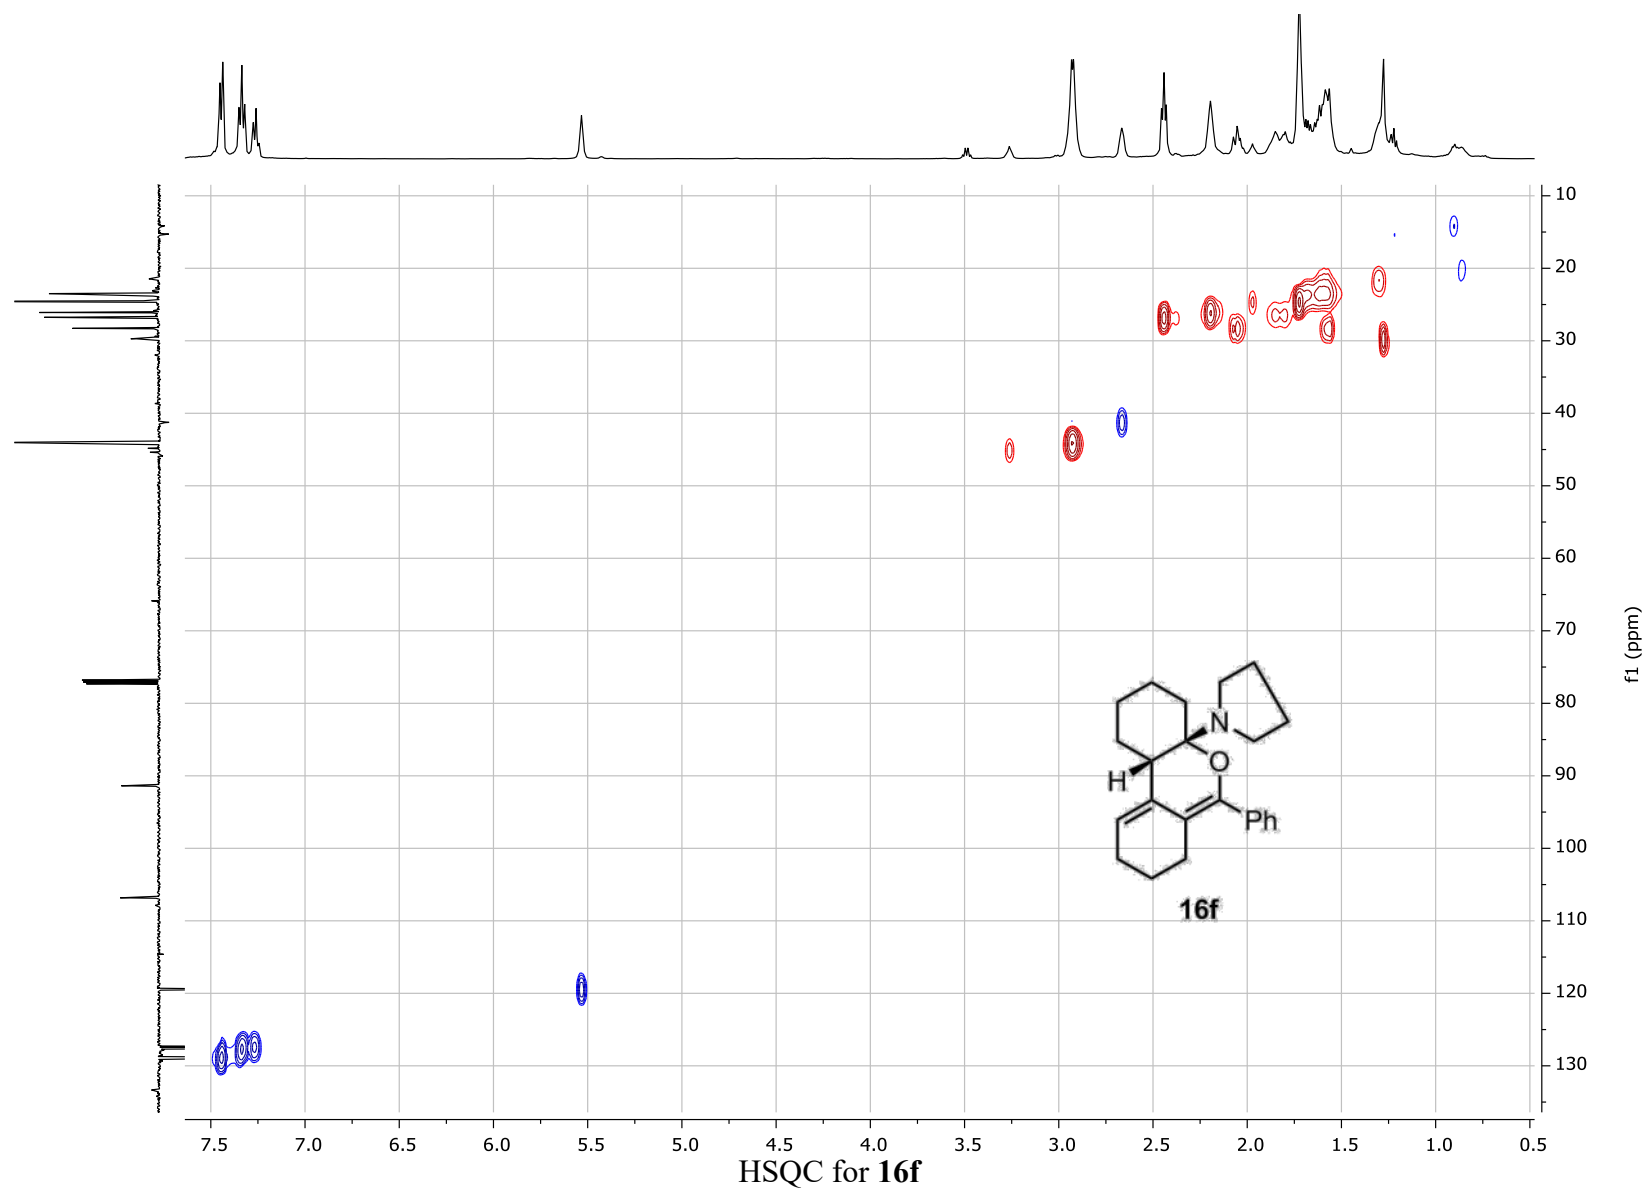

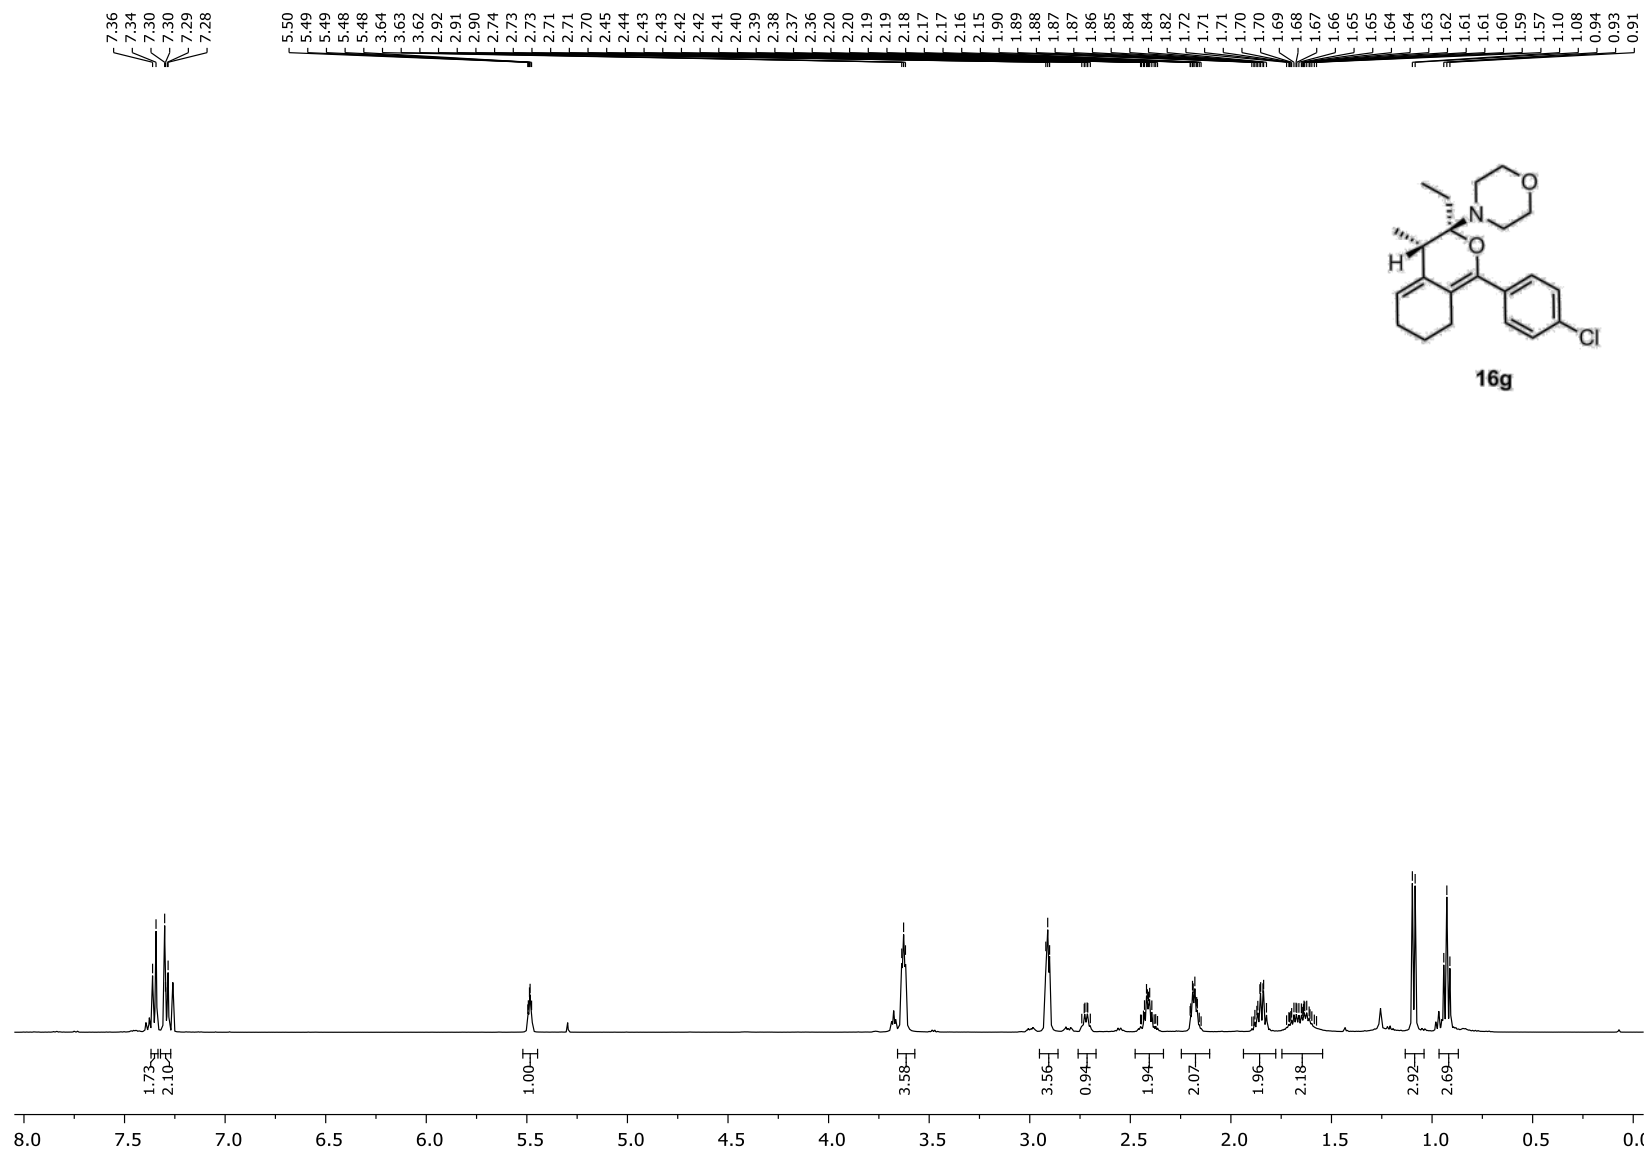

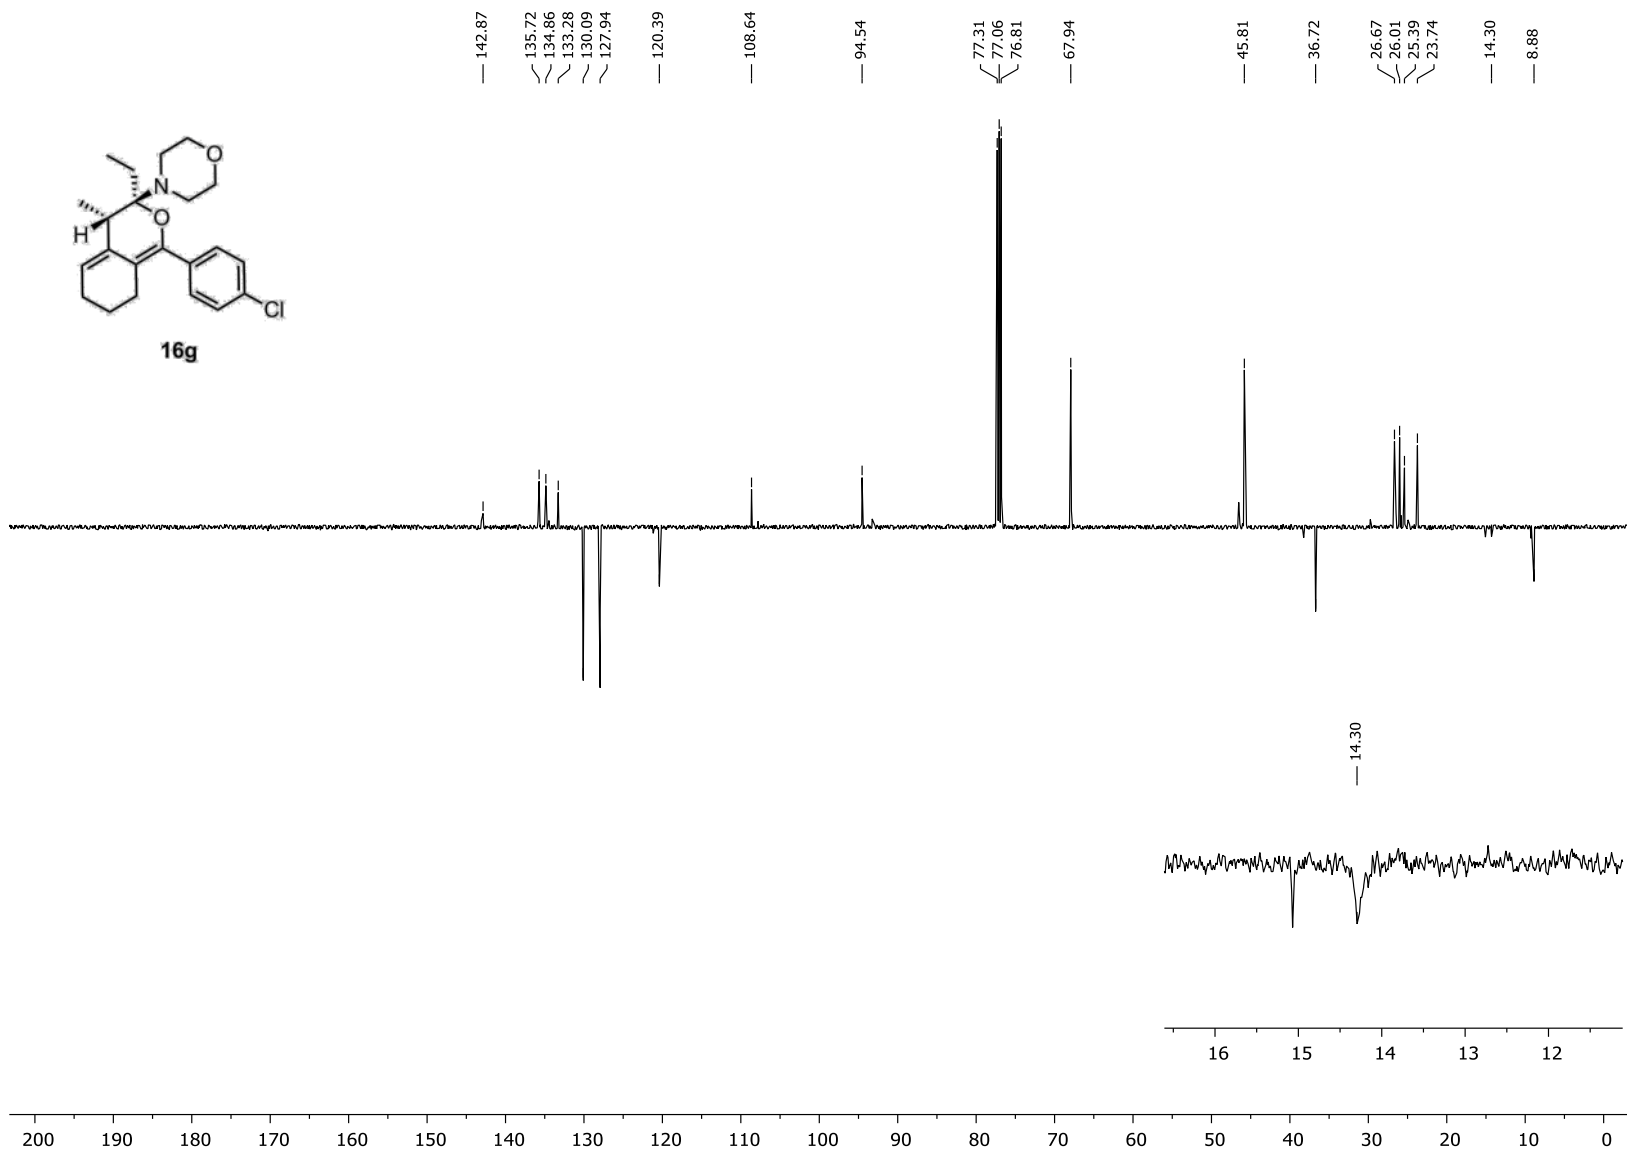

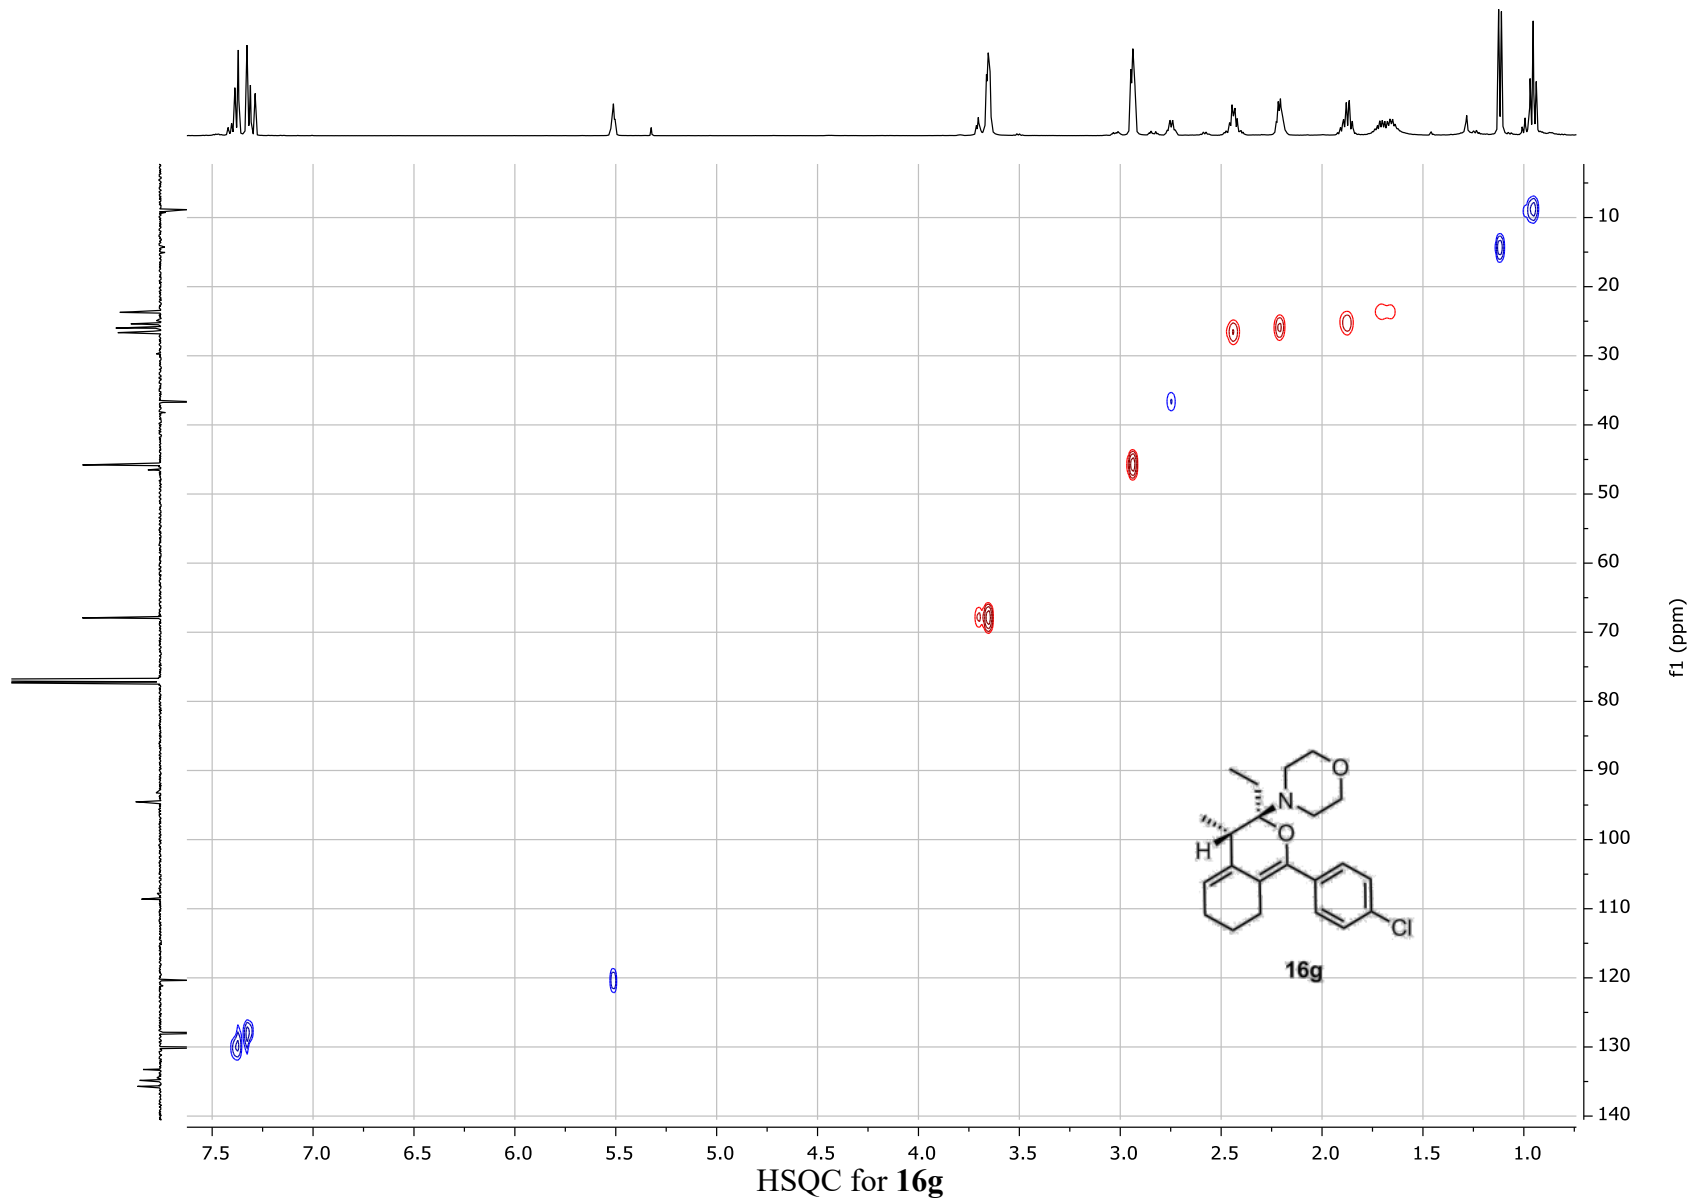

7.43  
7.42  
7.42  
7.41  
7.40  
7.40  
7.39  
7.38  
7.38  
7.37  
7.36  
6.99  
6.99  
6.90

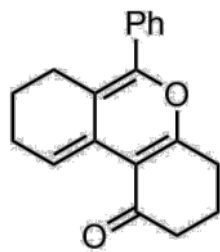

16h

2.54  
2.52  
2.51  
2.51  
2.49  
2.48  
2.43  
2.42  
2.42  
2.41  
2.40  
2.27  
2.27  
2.26  
2.25  
2.25  
2.24  
2.03  
2.02  
2.00  
1.99  
1.98  
1.64  
1.63  
1.62  
1.60  
1.59

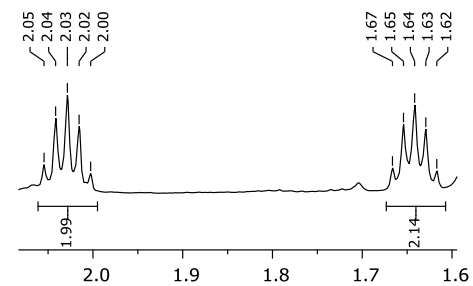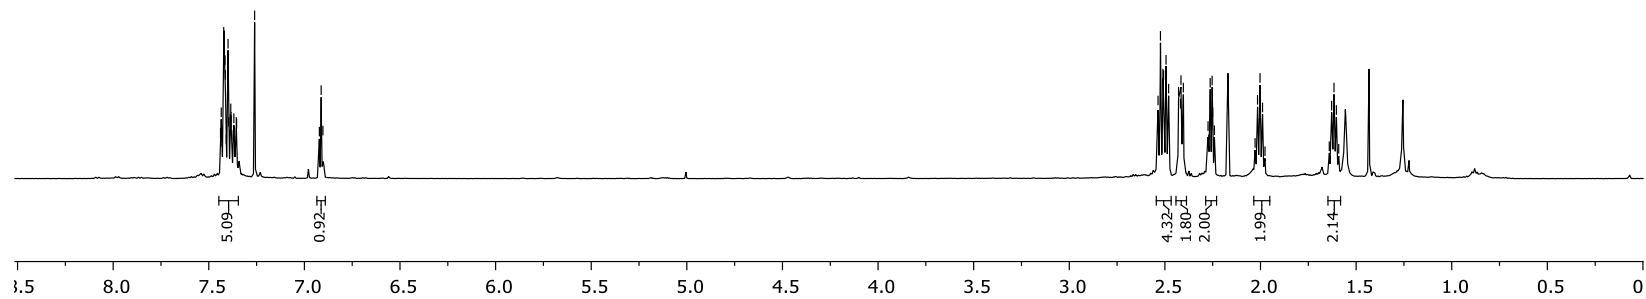

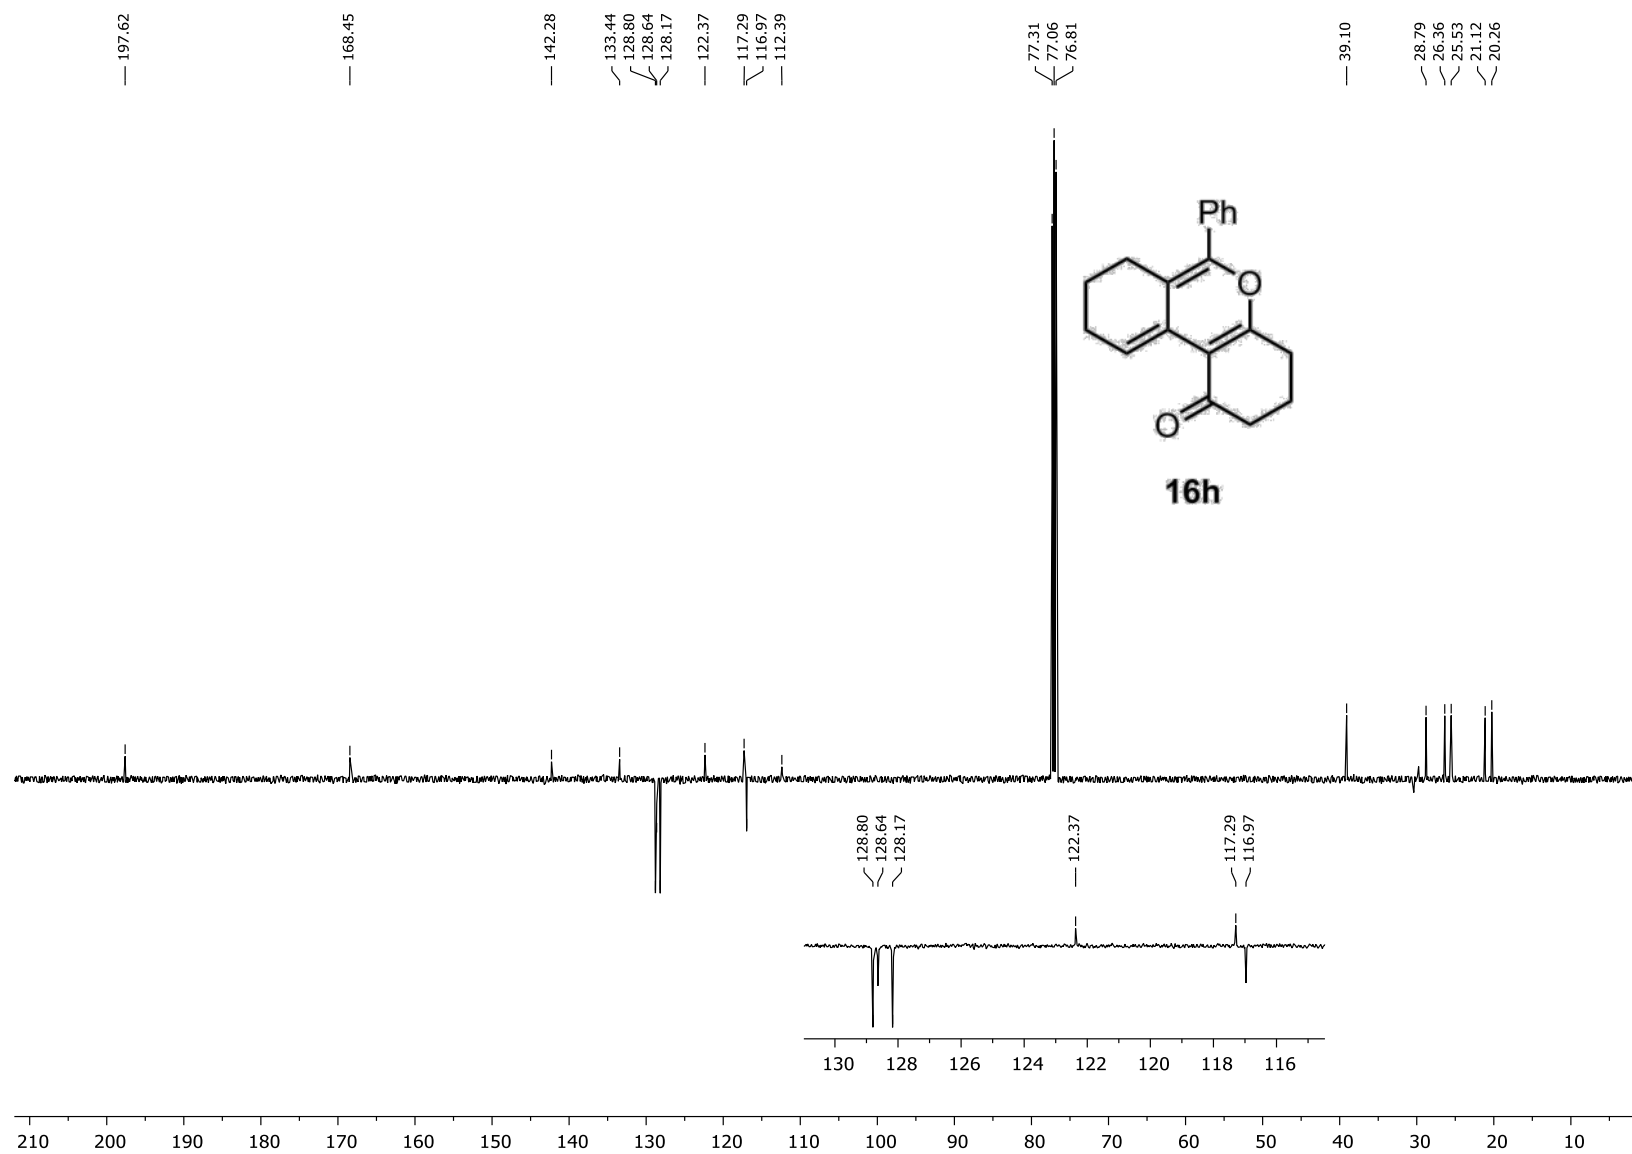

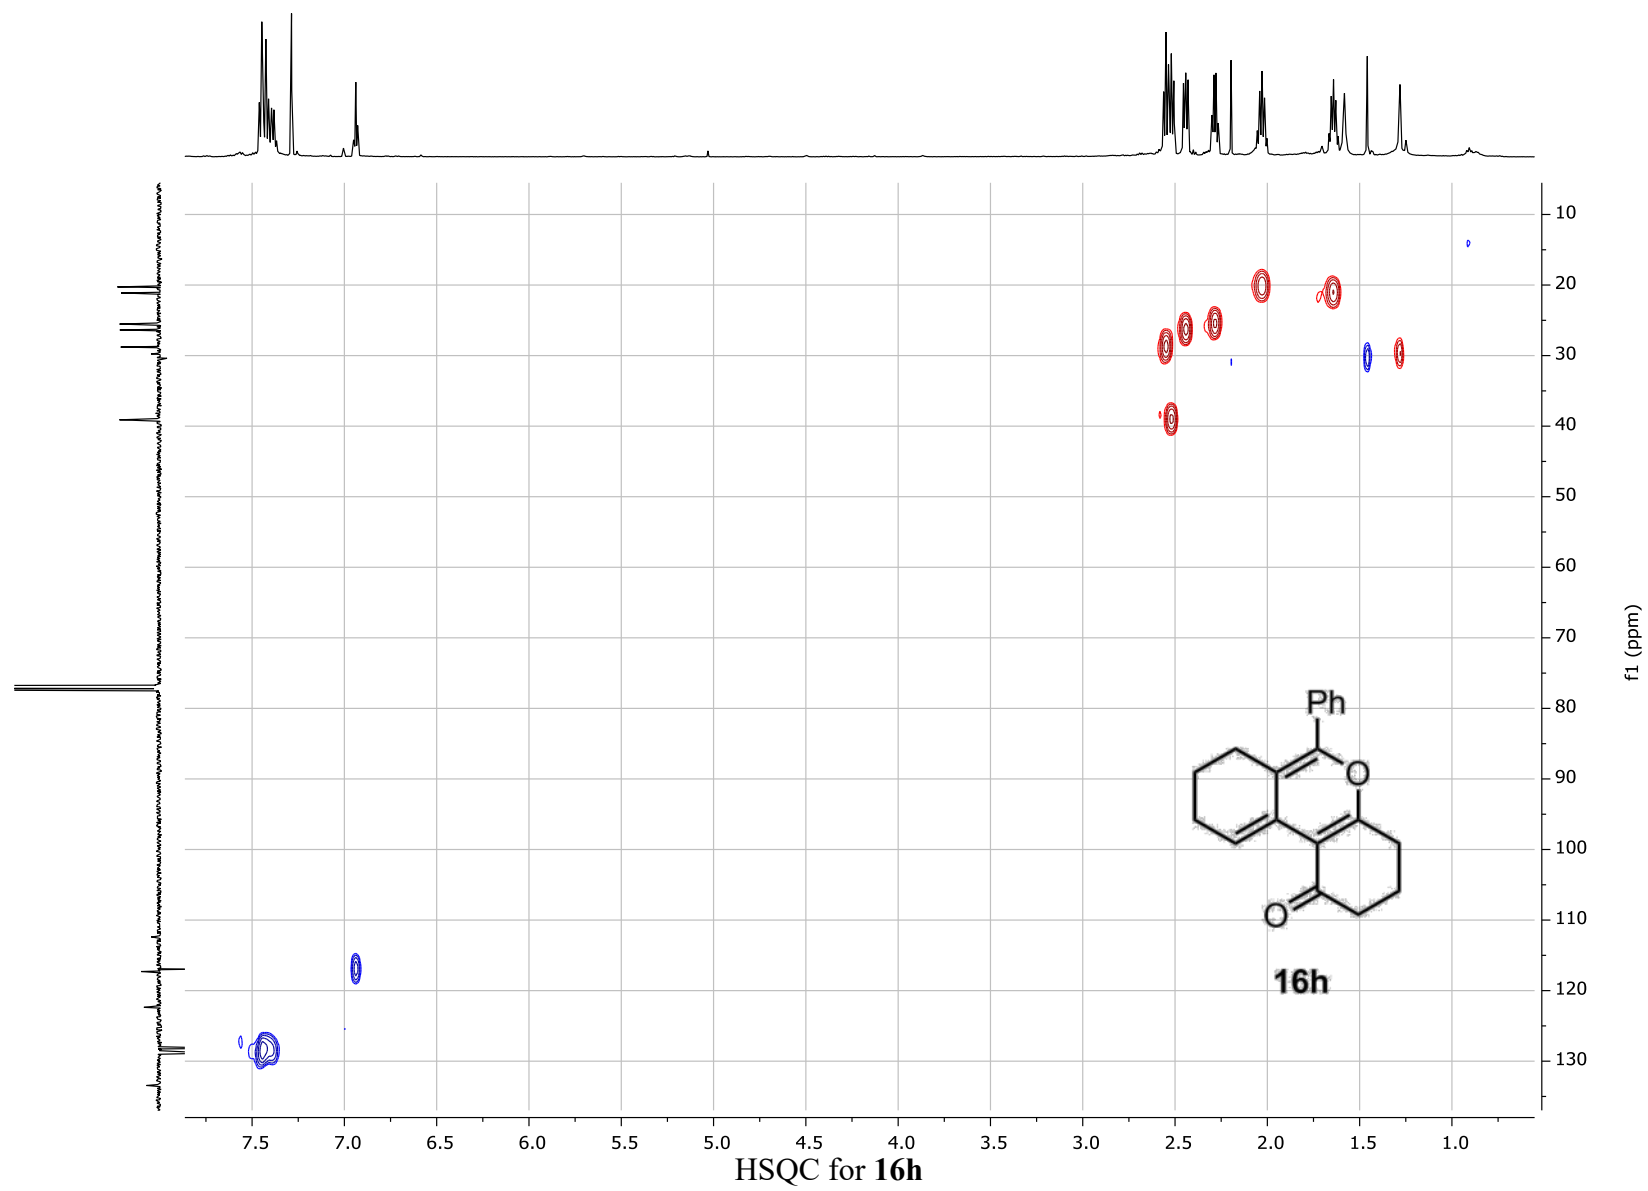

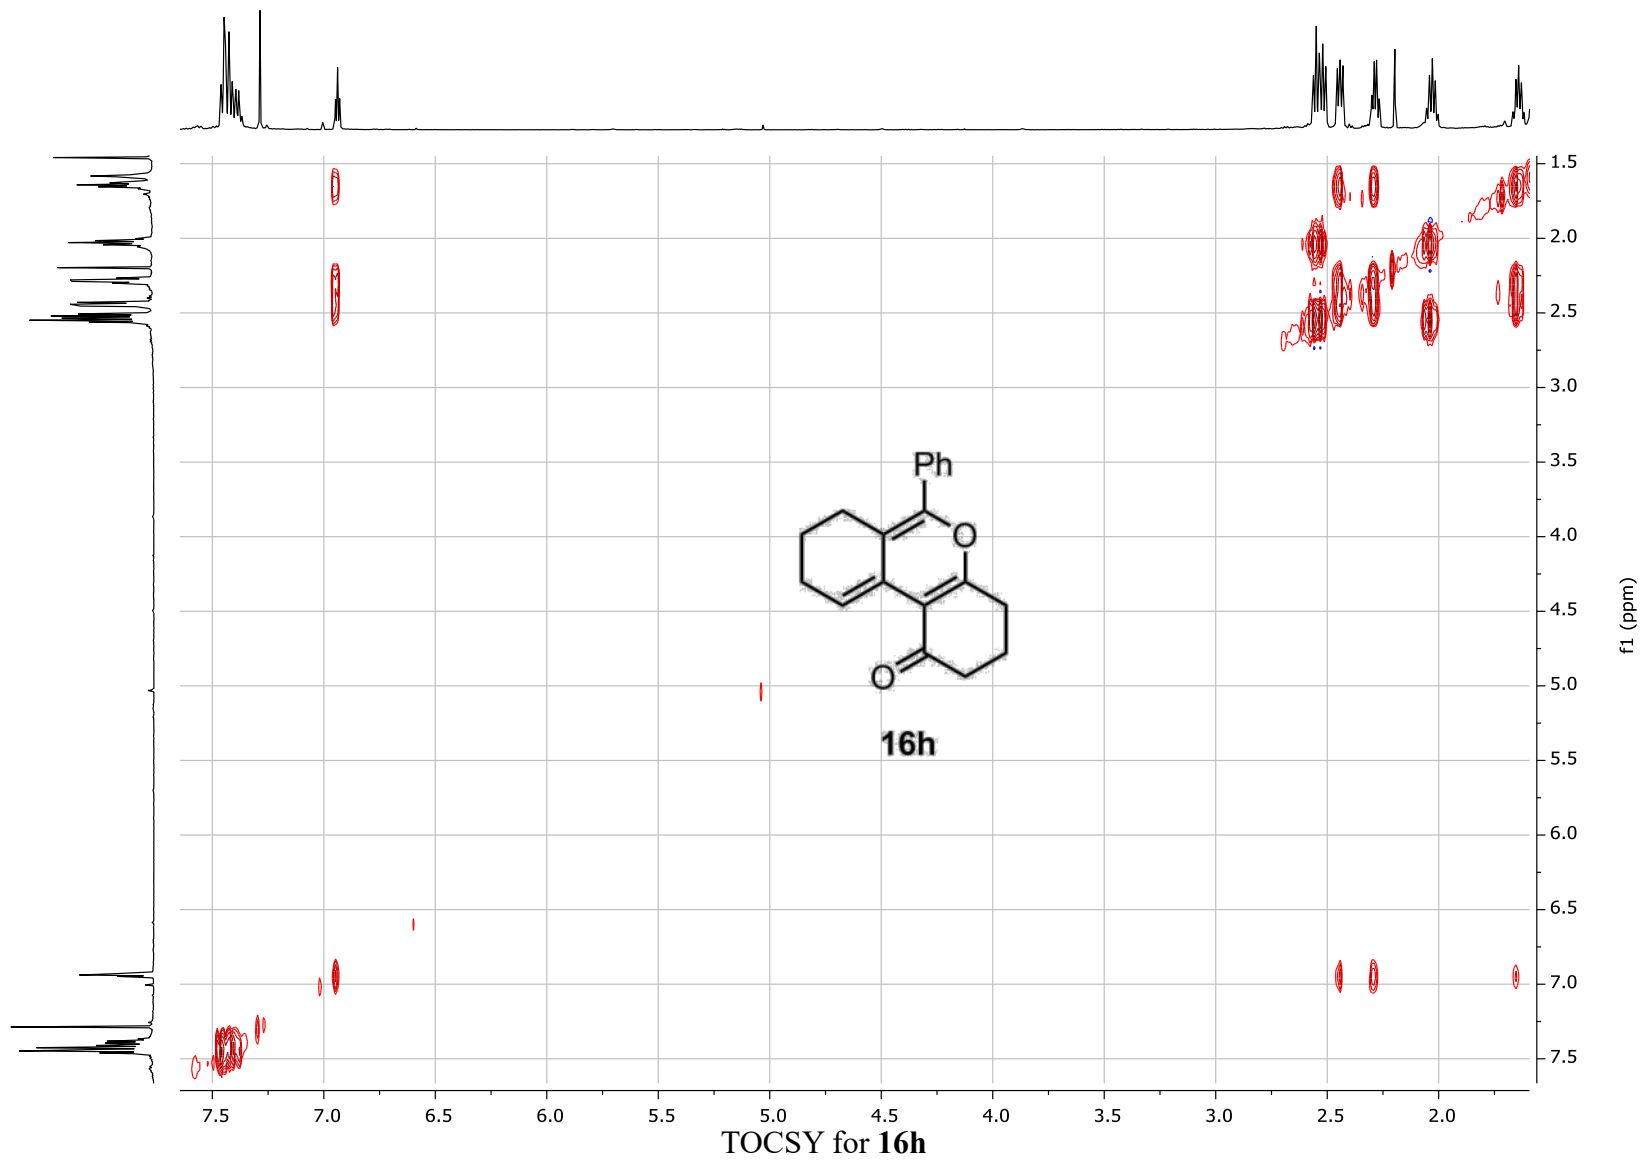



## X-ray Data for Product 12d

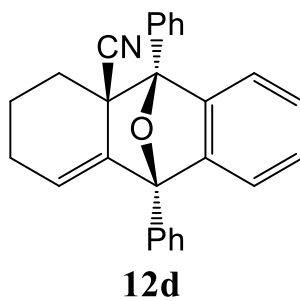

Molecule A

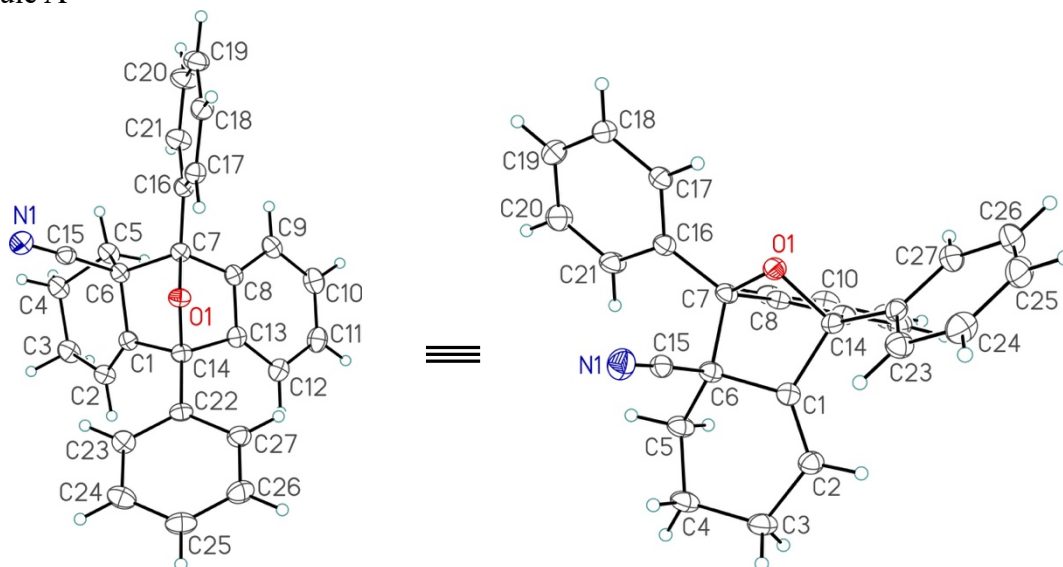

Molecule B

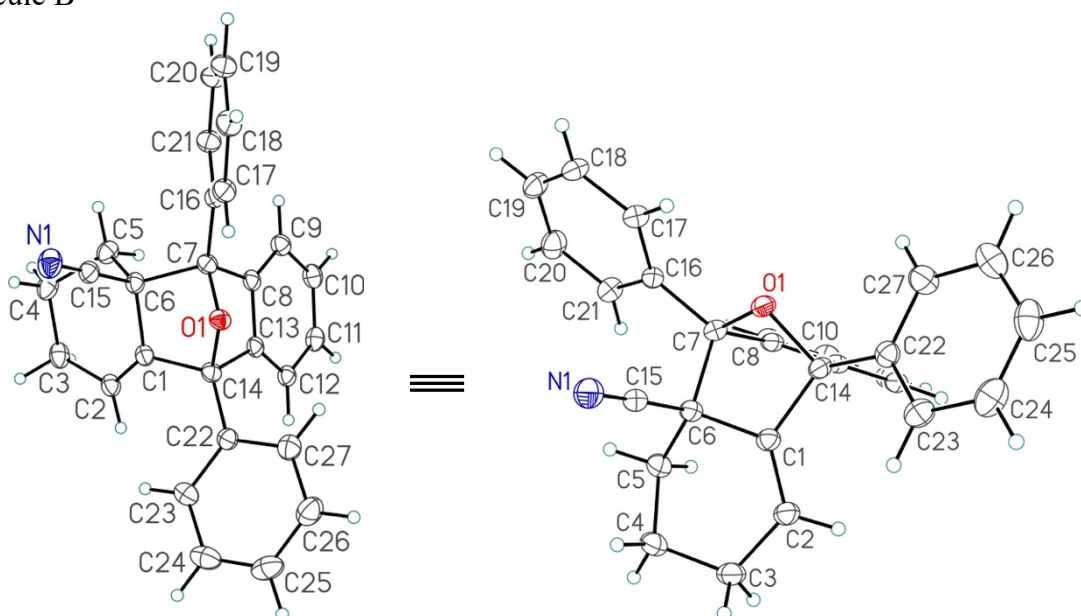

**Table 1.** Crystallographic Experimental Details*A. Crystal Data*

|                                          |                                    |
|------------------------------------------|------------------------------------|
| formula                                  | C <sub>27</sub> H <sub>21</sub> NO |
| formula weight                           | 375.45                             |
| crystal dimensions (mm)                  | 0.31 × 0.23 × 0.06                 |
| crystal system                           | triclinic                          |
| space group                              | <i>P</i> (No. 2)                   |
| unit cell parameters <sup>a</sup>        |                                    |
| <i>a</i> (Å)                             | 10.4535 (9)                        |
| <i>b</i> (Å)                             | 11.5142 (10)                       |
| <i>c</i> (Å)                             | 17.3923 (14)                       |
| α (deg)                                  | 71.1047 (11)                       |
| β (deg)                                  | 87.8758 (11)                       |
| γ (deg)                                  | 89.5875 (11)                       |
| <i>V</i> (Å <sup>3</sup> )               | 1979.2 (3)                         |
| <i>Z</i>                                 | 4                                  |
| ρ <sub>calcd</sub> (g cm <sup>-3</sup> ) | 1.260                              |
| μ (mm <sup>-1</sup> )                    | 0.076                              |

*B. Data Collection and Refinement Conditions*

|                                                                                                        |                                                                                        |
|--------------------------------------------------------------------------------------------------------|----------------------------------------------------------------------------------------|
| diffractometer                                                                                         | Bruker PLATFORM/APEX II CCD <sup>b</sup>                                               |
| radiation (λ [Å])                                                                                      | graphite-monochromated Mo Kα (0.71073)                                                 |
| temperature (°C)                                                                                       | -80                                                                                    |
| scan type                                                                                              | ω scans (0.3°) (20 s exposures)                                                        |
| data collection 2θ limit (deg)                                                                         | 52.99                                                                                  |
| total data collected                                                                                   | 15431 (-13 ≤ <i>h</i> ≤ 12, -14 ≤ <i>k</i> ≤ 14, -21 ≤ <i>l</i> ≤ 21)                  |
| independent reflections                                                                                | 8136 ( <i>R</i> <sub>int</sub> = 0.0361)                                               |
| number of observed reflections ( <i>NO</i> )                                                           | 5553 [ <i>F</i> <sub>o</sub> <sup>2</sup> ≥ 2σ( <i>F</i> <sub>o</sub> <sup>2</sup> )]  |
| structure solution method                                                                              | direct methods/dual space ( <i>SHELXD</i> <sup>c</sup> )                               |
| refinement method                                                                                      | full-matrix least-squares on <i>F</i> <sup>2</sup> ( <i>SHELXL-2014</i> <sup>d</sup> ) |
| absorption correction method                                                                           | Gaussian integration (face-indexed)                                                    |
| range of transmission factors                                                                          | 1.0000–0.8231                                                                          |
| data/restraints/parameters                                                                             | 8136 / 0 / 523                                                                         |
| goodness-of-fit ( <i>S</i> ) <sup>e</sup> [all data]                                                   | 1.023                                                                                  |
| final <i>R</i> indices <sup>f</sup>                                                                    |                                                                                        |
| <i>R</i> <sub>1</sub> [ <i>F</i> <sub>o</sub> <sup>2</sup> ≥ 2σ( <i>F</i> <sub>o</sub> <sup>2</sup> )] | 0.0521                                                                                 |
| <i>wR</i> <sub>2</sub> [all data]                                                                      | 0.1518                                                                                 |
| largest difference peak and hole                                                                       | 0.321 and -0.221 e Å <sup>-3</sup>                                                     |

<sup>a</sup>Obtained from least-squares refinement of 5641 reflections with 4.54° < 2θ < 52.48°.

<sup>b</sup>Programs for diffractometer operation, data collection, data reduction and absorption correction were those supplied by Bruker.

<sup>c</sup>Schneider, T. R.; Sheldrick, G. M. *Acta Crystallogr.* **2002**, D58, 1772-1779.

<sup>d</sup>Sheldrick, G. M. *Acta Crystallogr.* **2015**, C71, 3–8.

$eS = [\Sigma w(F_o^2 - F_c^2)^2 / (n - p)]^{1/2}$  ( $n$  = number of data;  $p$  = number of parameters varied;  $w = [\sigma^2(F_o^2) + (0.0798P)^2]^{-1}$  where  $P = [\text{Max}(F_o^2, 0) + 2F_c^2]/3$ ).

$fR_1 = \Sigma ||F_o| - |F_c|| / \Sigma |F_o|$ ;  $wR_2 = [\Sigma w(F_o^2 - F_c^2)^2 / \Sigma w(F_o^4)]^{1/2}$ .

**Table 2.** Atomic Coordinates and Equivalent Isotropic Displacement Parameters

(a) Molecule A

| Atom | x            | y            | z           | $U_{eq}$ , Å <sup>2</sup> |
|------|--------------|--------------|-------------|---------------------------|
| O1   | 0.32084(11)  | 0.30007(11)  | 0.34947(7)  | 0.0294(3)*                |
| N1   | 0.14271(18)  | 0.24811(16)  | 0.53516(11) | 0.0465(5)*                |
| C1   | 0.15280(17)  | 0.16363(16)  | 0.36272(11) | 0.0293(4)*                |
| C2   | 0.07751(18)  | 0.06953(17)  | 0.36727(12) | 0.0349(4)*                |
| C3   | -0.06261(18) | 0.06473(18)  | 0.39148(14) | 0.0428(5)*                |
| C4   | -0.10861(18) | 0.17559(17)  | 0.41441(13) | 0.0399(5)*                |
| C5   | -0.03807(17) | 0.29470(17)  | 0.36646(13) | 0.0365(5)*                |
| C6   | 0.10551(17)  | 0.27742(16)  | 0.38186(11) | 0.0295(4)*                |
| C7   | 0.20669(16)  | 0.37536(16)  | 0.32844(11) | 0.0279(4)*                |
| C8   | 0.19400(17)  | 0.38232(16)  | 0.24007(11) | 0.0302(4)*                |
| C9   | 0.14056(18)  | 0.46925(18)  | 0.17421(12) | 0.0367(5)*                |
| C10  | 0.1468(2)    | 0.4470(2)    | 0.09978(13) | 0.0452(5)*                |
| C11  | 0.2002(2)    | 0.3407(2)    | 0.09294(13) | 0.0443(5)*                |
| C12  | 0.25033(18)  | 0.25121(19)  | 0.16012(12) | 0.0379(5)*                |
| C13  | 0.24788(17)  | 0.27472(17)  | 0.23338(11) | 0.0314(4)*                |
| C14  | 0.28438(17)  | 0.20005(16)  | 0.31981(11) | 0.0295(4)*                |
| C15  | 0.12782(17)  | 0.26300(16)  | 0.46790(12) | 0.0314(4)*                |
| C16  | 0.22020(17)  | 0.49341(16)  | 0.34635(11) | 0.0301(4)*                |
| C17  | 0.33755(17)  | 0.52796(17)  | 0.36751(11) | 0.0317(4)*                |
| C18  | 0.35167(19)  | 0.64011(17)  | 0.37996(12) | 0.0367(5)*                |
| C19  | 0.2491(2)    | 0.71869(19)  | 0.37199(13) | 0.0443(5)*                |
| C20  | 0.1313(2)    | 0.68469(19)  | 0.35149(14) | 0.0484(6)*                |
| C21  | 0.11679(19)  | 0.57307(18)  | 0.33858(13) | 0.0409(5)*                |
| C22  | 0.38996(17)  | 0.10639(16)  | 0.33479(11) | 0.0302(4)*                |
| C23  | 0.39171(19)  | 0.00826(18)  | 0.40625(12) | 0.0379(5)*                |
| C24  | 0.4940(2)    | -0.07237(19) | 0.42244(14) | 0.0459(5)*                |
| C25  | 0.5966(2)    | -0.0541(2)   | 0.36665(14) | 0.0469(5)*                |
| C26  | 0.5958(2)    | 0.0433(2)    | 0.29533(14) | 0.0456(5)*                |
| C27  | 0.49321(19)  | 0.12336(18)  | 0.27920(13) | 0.0389(5)*                |

(b) Molecule B

| Atom | x            | y           | z           | $U_{eq}, \text{\AA}^2$ |
|------|--------------|-------------|-------------|------------------------|
| O1   | 0.20567(11)  | 0.38816(11) | 0.86935(7)  | 0.0291(3)*             |
| N1   | 0.32261(17)  | 0.11407(16) | 1.01204(11) | 0.0471(5)*             |
| C1   | 0.42747(17)  | 0.37202(16) | 0.85732(11) | 0.0293(4)*             |
| C2   | 0.55337(17)  | 0.38714(18) | 0.84885(11) | 0.0344(4)*             |
| C3   | 0.64413(18)  | 0.28669(18) | 0.84779(12) | 0.0407(5)*             |
| C4   | 0.58052(19)  | 0.16471(18) | 0.85434(13) | 0.0438(5)*             |
| C5   | 0.44825(18)  | 0.18203(18) | 0.81699(12) | 0.0375(5)*             |
| C6   | 0.36313(17)  | 0.25167(16) | 0.86021(11) | 0.0297(4)*             |
| C7   | 0.22849(17)  | 0.30301(16) | 0.82448(11) | 0.0292(4)*             |
| C8   | 0.25341(16)  | 0.39146(16) | 0.73835(11) | 0.0288(4)*             |
| C9   | 0.23818(18)  | 0.38329(18) | 0.66181(11) | 0.0335(4)*             |
| C10  | 0.27860(19)  | 0.48249(18) | 0.59470(12) | 0.0375(5)*             |
| C11  | 0.33440(18)  | 0.58554(18) | 0.60508(12) | 0.0362(5)*             |
| C12  | 0.34992(17)  | 0.59328(17) | 0.68252(11) | 0.0315(4)*             |
| C13  | 0.30802(16)  | 0.49604(16) | 0.74836(11) | 0.0284(4)*             |
| C14  | 0.31861(17)  | 0.46663(16) | 0.84033(11) | 0.0291(4)*             |
| C15  | 0.33875(17)  | 0.17473(17) | 0.94560(12) | 0.0331(4)*             |
| C16  | 0.12356(17)  | 0.20890(16) | 0.83995(11) | 0.0295(4)*             |
| C17  | 0.02732(18)  | 0.20032(17) | 0.89854(12) | 0.0359(5)*             |
| C18  | -0.06671(18) | 0.10969(18) | 0.91364(13) | 0.0420(5)*             |
| C19  | -0.0653(2)   | 0.02888(19) | 0.87017(13) | 0.0452(5)*             |
| C20  | 0.0300(2)    | 0.03684(19) | 0.81178(13) | 0.0442(5)*             |
| C21  | 0.12480(19)  | 0.12615(17) | 0.79695(12) | 0.0382(5)*             |
| C22  | 0.31384(18)  | 0.57187(16) | 0.87313(11) | 0.0314(4)*             |
| C23  | 0.4156(2)    | 0.60579(19) | 0.91068(12) | 0.0401(5)*             |
| C24  | 0.4063(2)    | 0.7078(2)   | 0.93638(13) | 0.0512(6)*             |
| C25  | 0.2958(3)    | 0.7754(2)   | 0.92697(13) | 0.0527(6)*             |
| C26  | 0.1917(2)    | 0.7396(2)   | 0.89249(14) | 0.0519(6)*             |
| C27  | 0.2015(2)    | 0.64016(19) | 0.86471(13) | 0.0432(5)*             |

Anisotropically-refined atoms are marked with an asterisk (\*). The form of the anisotropic displacement parameter is:  $\exp[-2\pi^2(h^2a^{*2}U_{11} + k^2b^{*2}U_{22} + l^2c^{*2}U_{33} + 2klb^{*c^*}U_{23} + 2hla^{*c^*}U_{13} + 2hka^{*b^*}U_{12})]$ .

**Table 3.** Selected Interatomic Distances (Å)

| <i>(a) Molecule A</i> |       |          | <i>(b) Molecule B</i> |       |          |
|-----------------------|-------|----------|-----------------------|-------|----------|
| Atom1                 | Atom2 | Distance | Atom1                 | Atom2 | Distance |
| O1                    | C7    | 1.456(2) | O1                    | C7    | 1.451(2) |
| O1                    | C14   | 1.464(2) | O1                    | C14   | 1.463(2) |
| N1                    | C15   | 1.142(2) | N1                    | C15   | 1.147(2) |
| C1                    | C2    | 1.323(2) | C1                    | C2    | 1.325(2) |
| C1                    | C6    | 1.527(2) | C1                    | C6    | 1.530(2) |
| C1                    | C14   | 1.534(2) | C1                    | C14   | 1.539(2) |
| C2                    | C3    | 1.505(3) | C2                    | C3    | 1.495(3) |
| C3                    | C4    | 1.525(3) | C3                    | C4    | 1.527(3) |
| C4                    | C5    | 1.533(2) | C4                    | C5    | 1.534(3) |
| C5                    | C6    | 1.535(2) | C5                    | C6    | 1.527(3) |
| C6                    | C7    | 1.587(2) | C6                    | C7    | 1.591(3) |
| C6                    | C15   | 1.478(3) | C6                    | C15   | 1.476(3) |
| C7                    | C8    | 1.523(3) | C7                    | C8    | 1.528(2) |
| C7                    | C16   | 1.498(2) | C7                    | C16   | 1.502(2) |
| C8                    | C9    | 1.387(3) | C8                    | C9    | 1.379(3) |
| C8                    | C13   | 1.394(3) | C8                    | C13   | 1.400(2) |
| C9                    | C10   | 1.398(3) | C9                    | C10   | 1.397(3) |
| C10                   | C11   | 1.379(3) | C10                   | C11   | 1.392(3) |
| C11                   | C12   | 1.400(3) | C11                   | C12   | 1.394(3) |
| C12                   | C13   | 1.385(3) | C12                   | C13   | 1.377(2) |
| C13                   | C14   | 1.531(3) | C13                   | C14   | 1.532(2) |
| C14                   | C22   | 1.507(2) | C14                   | C22   | 1.497(3) |
| C16                   | C17   | 1.391(3) | C16                   | C17   | 1.386(3) |
| C16                   | C21   | 1.394(3) | C16                   | C21   | 1.388(3) |
| C17                   | C18   | 1.387(3) | C17                   | C18   | 1.394(3) |
| C18                   | C19   | 1.380(3) | C18                   | C19   | 1.376(3) |
| C19                   | C20   | 1.388(3) | C19                   | C20   | 1.378(3) |
| C20                   | C21   | 1.385(3) | C20                   | C21   | 1.389(3) |
| C22                   | C23   | 1.383(3) | C22                   | C23   | 1.391(3) |
| C22                   | C27   | 1.393(3) | C22                   | C27   | 1.394(3) |
| C23                   | C24   | 1.387(3) | C23                   | C24   | 1.387(3) |
| C24                   | C25   | 1.389(3) | C24                   | C25   | 1.374(3) |
| C25                   | C26   | 1.377(3) | C25                   | C26   | 1.389(3) |
| C26                   | C27   | 1.385(3) | C26                   | C27   | 1.381(3) |

**Table 4.** Selected Interatomic Angles (deg)

| <i>(a) Molecule A</i> |       |       |            | <i>(b) Molecule B</i> |       |       |            |
|-----------------------|-------|-------|------------|-----------------------|-------|-------|------------|
| Atom1                 | Atom2 | Atom3 | Angle      | Atom1                 | Atom2 | Atom3 | Angle      |
| C7                    | O1    | C14   | 98.84(12)  | C7                    | O1    | C14   | 98.77(12)  |
| C2                    | C1    | C6    | 123.04(17) | C2                    | C1    | C6    | 121.94(17) |
| C2                    | C1    | C14   | 130.20(17) | C2                    | C1    | C14   | 130.80(17) |
| C6                    | C1    | C14   | 105.04(14) | C6                    | C1    | C14   | 104.70(14) |
| C1                    | C2    | C3    | 123.24(18) | C1                    | C2    | C3    | 123.32(18) |
| C2                    | C3    | C4    | 113.79(16) | C2                    | C3    | C4    | 114.80(16) |
| C3                    | C4    | C5    | 113.27(16) | C3                    | C4    | C5    | 112.37(16) |
| C4                    | C5    | C6    | 108.80(15) | C4                    | C5    | C6    | 108.83(17) |
| C1                    | C6    | C5    | 109.77(15) | C1                    | C6    | C5    | 110.41(15) |
| C1                    | C6    | C7    | 99.71(13)  | C1                    | C6    | C7    | 99.67(13)  |
| C1                    | C6    | C15   | 109.69(15) | C1                    | C6    | C15   | 109.72(15) |
| C5                    | C6    | C7    | 120.64(15) | C5                    | C6    | C7    | 119.91(16) |
| C5                    | C6    | C15   | 109.48(15) | C5                    | C6    | C15   | 109.46(15) |
| C7                    | C6    | C15   | 106.93(14) | C7                    | C6    | C15   | 107.07(14) |
| O1                    | C7    | C6    | 97.84(13)  | O1                    | C7    | C6    | 98.37(13)  |
| O1                    | C7    | C8    | 100.84(13) | O1                    | C7    | C8    | 101.18(13) |
| O1                    | C7    | C16   | 111.39(14) | O1                    | C7    | C16   | 112.07(14) |
| C6                    | C7    | C8    | 107.73(14) | C6                    | C7    | C8    | 107.66(13) |
| C6                    | C7    | C16   | 118.00(14) | C6                    | C7    | C16   | 115.35(14) |
| C8                    | C7    | C16   | 117.89(15) | C8                    | C7    | C16   | 119.34(15) |
| C7                    | C8    | C9    | 132.35(17) | C7                    | C8    | C9    | 133.75(17) |
| C7                    | C8    | C13   | 106.08(15) | C7                    | C8    | C13   | 105.28(15) |
| C9                    | C8    | C13   | 121.55(18) | C9                    | C8    | C13   | 120.89(17) |
| C8                    | C9    | C10   | 117.36(19) | C8                    | C9    | C10   | 118.06(18) |
| C9                    | C10   | C11   | 121.2(2)   | C9                    | C10   | C11   | 120.78(18) |
| C10                   | C11   | C12   | 121.3(2)   | C10                   | C11   | C12   | 120.97(17) |
| C11                   | C12   | C13   | 117.61(19) | C11                   | C12   | C13   | 117.95(17) |
| C8                    | C13   | C12   | 120.89(18) | C8                    | C13   | C12   | 121.34(17) |
| C8                    | C13   | C14   | 105.12(15) | C8                    | C13   | C14   | 105.49(15) |
| C12                   | C13   | C14   | 133.77(18) | C12                   | C13   | C14   | 132.88(16) |
| O1                    | C14   | C1    | 101.36(13) | O1                    | C14   | C1    | 101.90(13) |
| O1                    | C14   | C13   | 99.68(13)  | O1                    | C14   | C13   | 100.11(13) |
| O1                    | C14   | C22   | 109.57(14) | O1                    | C14   | C22   | 110.10(14) |
| C1                    | C14   | C13   | 101.96(14) | C1                    | C14   | C13   | 100.65(14) |
| C1                    | C14   | C22   | 119.62(15) | C1                    | C14   | C22   | 123.15(16) |
| C13                   | C14   | C22   | 121.26(15) | C13                   | C14   | C22   | 117.59(15) |
| N1                    | C15   | C6    | 177.6(2)   | N1                    | C15   | C6    | 178.5(2)   |
| C7                    | C16   | C17   | 120.55(16) | C7                    | C16   | C17   | 121.12(16) |
| C7                    | C16   | C21   | 120.57(17) | C7                    | C16   | C21   | 119.73(16) |

|     |     |     |            |     |     |     |            |
|-----|-----|-----|------------|-----|-----|-----|------------|
| C17 | C16 | C21 | 118.82(17) | C17 | C16 | C21 | 119.11(16) |
| C16 | C17 | C18 | 120.55(18) | C16 | C17 | C18 | 120.09(19) |
| C17 | C18 | C19 | 120.37(19) | C17 | C18 | C19 | 120.35(19) |
| C18 | C19 | C20 | 119.54(19) | C18 | C19 | C20 | 119.92(18) |
| C19 | C20 | C21 | 120.3(2)   | C19 | C20 | C21 | 120.1(2)   |
| C16 | C21 | C20 | 120.37(19) | C16 | C21 | C20 | 120.46(19) |
| C14 | C22 | C23 | 121.04(17) | C14 | C22 | C23 | 123.58(17) |
| C14 | C22 | C27 | 119.90(17) | C14 | C22 | C27 | 118.03(17) |
| C23 | C22 | C27 | 118.85(18) | C23 | C22 | C27 | 118.39(18) |
| C22 | C23 | C24 | 120.80(19) | C22 | C23 | C24 | 120.4(2)   |
| C23 | C24 | C25 | 119.8(2)   | C23 | C24 | C25 | 120.8(2)   |
| C24 | C25 | C26 | 119.8(2)   | C24 | C25 | C26 | 119.3(2)   |
| C25 | C26 | C27 | 120.2(2)   | C25 | C26 | C27 | 120.2(2)   |
| C22 | C27 | C26 | 120.50(19) | C22 | C27 | C26 | 120.9(2)   |

**Table 5.** Torsional Angles (deg)

| <i>(a) Molecule A</i> |       |       |       |             | <i>(b) Molecule B</i> |       |       |       |             |
|-----------------------|-------|-------|-------|-------------|-----------------------|-------|-------|-------|-------------|
| Atom1                 | Atom2 | Atom3 | Atom4 | Angle       | Atom1                 | Atom2 | Atom3 | Atom4 | Angle       |
| C14                   | O1    | C7    | C6    | 60.15(14)   | C14                   | O1    | C7    | C6    | 59.68(14)   |
| C14                   | O1    | C7    | C8    | -49.69(14)  | C14                   | O1    | C7    | C8    | -50.29(15)  |
| C14                   | O1    | C7    | C16   | -175.60(14) | C14                   | O1    | C7    | C16   | -178.54(14) |
| C7                    | O1    | C14   | C1    | -52.69(15)  | C7                    | O1    | C14   | C1    | -52.30(15)  |
| C7                    | O1    | C14   | C13   | 51.71(14)   | C7                    | O1    | C14   | C13   | 50.96(15)   |
| C7                    | O1    | C14   | C22   | 179.98(14)  | C7                    | O1    | C14   | C22   | 175.45(14)  |
| C6                    | C1    | C2    | C3    | 0.2(3)      | C6                    | C1    | C2    | C3    | -4.8(3)     |
| C14                   | C1    | C2    | C3    | -162.52(19) | C14                   | C1    | C2    | C3    | -163.77(18) |
| C2                    | C1    | C6    | C5    | -26.7(2)    | C2                    | C1    | C6    | C5    | -24.6(2)    |
| C2                    | C1    | C6    | C7    | -154.31(18) | C2                    | C1    | C6    | C7    | -151.66(17) |
| C2                    | C1    | C6    | C15   | 93.7(2)     | C2                    | C1    | C6    | C15   | 96.2(2)     |
| C14                   | C1    | C6    | C5    | 139.77(15)  | C14                   | C1    | C6    | C5    | 139.09(15)  |
| C14                   | C1    | C6    | C7    | 12.11(17)   | C14                   | C1    | C6    | C7    | 11.99(16)   |
| C14                   | C1    | C6    | C15   | -99.91(16)  | C14                   | C1    | C6    | C15   | -100.18(16) |
| C2                    | C1    | C14   | O1    | -171.62(19) | C2                    | C1    | C14   | O1    | -175.28(19) |
| C2                    | C1    | C14   | C13   | 85.8(2)     | C2                    | C1    | C14   | C13   | 81.9(2)     |
| C2                    | C1    | C14   | C22   | -51.1(3)    | C2                    | C1    | C14   | C22   | -51.4(3)    |
| C6                    | C1    | C14   | O1    | 23.31(17)   | C6                    | C1    | C14   | O1    | 23.11(17)   |
| C6                    | C1    | C14   | C13   | -79.27(16)  | C6                    | C1    | C14   | C13   | -79.73(15)  |
| C6                    | C1    | C14   | C22   | 143.79(16)  | C6                    | C1    | C14   | C22   | 146.97(16)  |
| C1                    | C2    | C3    | C4    | -2.9(3)     | C1                    | C2    | C3    | C4    | 2.0(3)      |
| C2                    | C3    | C4    | C5    | 32.8(3)     | C2                    | C3    | C4    | C5    | 30.2(2)     |
| C3                    | C4    | C5    | C6    | -58.9(2)    | C3                    | C4    | C5    | C6    | -58.6(2)    |
| C4                    | C5    | C6    | C1    | 53.8(2)     | C4                    | C5    | C6    | C1    | 54.59(19)   |
| C4                    | C5    | C6    | C7    | 168.75(17)  | C4                    | C5    | C6    | C7    | 169.47(15)  |
| C4                    | C5    | C6    | C15   | -66.6(2)    | C4                    | C5    | C6    | C15   | -66.31(19)  |
| C1                    | C6    | C7    | O1    | -43.68(15)  | C1                    | C6    | C7    | O1    | -43.54(14)  |
| C1                    | C6    | C7    | C8    | 60.40(17)   | C1                    | C6    | C7    | C8    | 61.09(16)   |
| C1                    | C6    | C7    | C16   | -163.03(15) | C1                    | C6    | C7    | C16   | -162.88(15) |
| C5                    | C6    | C7    | O1    | -163.69(16) | C5                    | C6    | C7    | O1    | -163.94(15) |
| C5                    | C6    | C7    | C8    | -59.6(2)    | C5                    | C6    | C7    | C8    | -59.3(2)    |
| C5                    | C6    | C7    | C16   | 77.0(2)     | C5                    | C6    | C7    | C16   | 76.7(2)     |
| C15                   | C6    | C7    | O1    | 70.48(15)   | C15                   | C6    | C7    | O1    | 70.69(16)   |
| C15                   | C6    | C7    | C8    | 174.56(14)  | C15                   | C6    | C7    | C8    | 175.32(14)  |
| C15                   | C6    | C7    | C16   | -48.9(2)    | C15                   | C6    | C7    | C16   | -48.6(2)    |
| O1                    | C7    | C8    | C9    | -152.76(19) | O1                    | C7    | C8    | C9    | -153.08(19) |
| O1                    | C7    | C8    | C13   | 28.54(16)   | O1                    | C7    | C8    | C13   | 30.23(17)   |
| C6                    | C7    | C8    | C9    | 105.3(2)    | C6                    | C7    | C8    | C9    | 104.3(2)    |
| C6                    | C7    | C8    | C13   | -73.41(17)  | C6                    | C7    | C8    | C13   | -72.39(17)  |



|     |     |     |     |             |     |     |     |     |             |
|-----|-----|-----|-----|-------------|-----|-----|-----|-----|-------------|
| C16 | C7  | C8  | C9  | -31.3(3)    | C16 | C7  | C8  | C9  | -29.7(3)    |
| C16 | C7  | C8  | C13 | 149.98(15)  | C16 | C7  | C8  | C13 | 153.64(16)  |
| O1  | C7  | C16 | C17 | 9.5(2)      | O1  | C7  | C16 | C17 | -7.3(2)     |
| O1  | C7  | C16 | C21 | -173.32(16) | O1  | C7  | C16 | C21 | 174.91(16)  |
| C6  | C7  | C16 | C17 | 121.52(18)  | C6  | C7  | C16 | C17 | 104.2(2)    |
| C6  | C7  | C16 | C21 | -61.3(2)    | C6  | C7  | C16 | C21 | -73.6(2)    |
| C8  | C7  | C16 | C17 | -106.3(2)   | C8  | C7  | C16 | C17 | -125.17(19) |
| C8  | C7  | C16 | C21 | 70.8(2)     | C8  | C7  | C16 | C21 | 57.0(2)     |
| C7  | C8  | C9  | C10 | 179.26(18)  | C7  | C8  | C9  | C10 | -176.40(18) |
| C13 | C8  | C9  | C10 | -2.2(3)     | C13 | C8  | C9  | C10 | -0.1(3)     |
| C7  | C8  | C13 | C12 | 179.17(16)  | C7  | C8  | C13 | C12 | 176.29(16)  |
| C7  | C8  | C13 | C14 | 3.72(18)    | C7  | C8  | C13 | C14 | 1.70(17)    |
| C9  | C8  | C13 | C12 | 0.3(3)      | C9  | C8  | C13 | C12 | -0.9(3)     |
| C9  | C8  | C13 | C14 | -175.15(16) | C9  | C8  | C13 | C14 | -175.51(16) |
| C8  | C9  | C10 | C11 | 2.1(3)      | C8  | C9  | C10 | C11 | 1.0(3)      |
| C9  | C10 | C11 | C12 | 0.0(3)      | C9  | C10 | C11 | C12 | -0.9(3)     |
| C10 | C11 | C12 | C13 | -1.9(3)     | C10 | C11 | C12 | C13 | -0.2(3)     |
| C11 | C12 | C13 | C8  | 1.8(3)      | C11 | C12 | C13 | C8  | 1.1(3)      |
| C11 | C12 | C13 | C14 | 175.68(19)  | C11 | C12 | C13 | C14 | 173.94(18)  |
| C8  | C13 | C14 | O1  | -34.46(16)  | C8  | C13 | C14 | O1  | -32.69(17)  |
| C8  | C13 | C14 | C1  | 69.45(16)   | C8  | C13 | C14 | C1  | 71.59(16)   |
| C8  | C13 | C14 | C22 | -154.53(15) | C8  | C13 | C14 | C22 | -151.84(16) |
| C12 | C13 | C14 | O1  | 150.95(19)  | C12 | C13 | C14 | O1  | 153.62(19)  |
| C12 | C13 | C14 | C1  | -105.1(2)   | C12 | C13 | C14 | C1  | -102.1(2)   |
| C12 | C13 | C14 | C22 | 30.9(3)     | C12 | C13 | C14 | C22 | 34.5(3)     |
| O1  | C14 | C22 | C23 | 90.48(19)   | O1  | C14 | C22 | C23 | 130.74(18)  |
| O1  | C14 | C22 | C27 | -84.3(2)    | O1  | C14 | C22 | C27 | -49.9(2)    |
| C1  | C14 | C22 | C23 | -25.8(2)    | C1  | C14 | C22 | C23 | 10.6(3)     |
| C1  | C14 | C22 | C27 | 159.48(17)  | C1  | C14 | C22 | C27 | -170.04(16) |
| C13 | C14 | C22 | C23 | -154.40(17) | C13 | C14 | C22 | C23 | -115.5(2)   |
| C13 | C14 | C22 | C27 | 30.9(2)     | C13 | C14 | C22 | C27 | 63.8(2)     |
| C7  | C16 | C17 | C18 | 176.63(16)  | C7  | C16 | C17 | C18 | -177.92(18) |
| C21 | C16 | C17 | C18 | -0.6(3)     | C21 | C16 | C17 | C18 | -0.1(3)     |
| C7  | C16 | C21 | C20 | -176.96(18) | C7  | C16 | C21 | C20 | 178.61(18)  |
| C17 | C16 | C21 | C20 | 0.2(3)      | C17 | C16 | C21 | C20 | 0.7(3)      |
| C16 | C17 | C18 | C19 | 0.4(3)      | C16 | C17 | C18 | C19 | -0.5(3)     |
| C17 | C18 | C19 | C20 | 0.1(3)      | C17 | C18 | C19 | C20 | 0.5(3)      |
| C18 | C19 | C20 | C21 | -0.4(3)     | C18 | C19 | C20 | C21 | 0.2(3)      |
| C19 | C20 | C21 | C16 | 0.3(3)      | C19 | C20 | C21 | C16 | -0.8(3)     |

**Table 5.** Torsional Angles (continued)

| <i>(a) Molecule A</i> |       |       |       |             | <i>(b) Molecule B</i> |       |       |       |             |
|-----------------------|-------|-------|-------|-------------|-----------------------|-------|-------|-------|-------------|
| Atom1                 | Atom2 | Atom3 | Atom4 | Angle       | Atom1                 | Atom2 | Atom3 | Atom4 | Angle       |
| C14                   | C22   | C23   | C24   | -175.01(18) | C14                   | C22   | C23   | C24   | 177.11(18)  |
| C27                   | C22   | C23   | C24   | -0.2(3)     | C27                   | C22   | C23   | C24   | -2.2(3)     |
| C14                   | C22   | C27   | C26   | 174.81(18)  | C14                   | C22   | C27   | C26   | -178.94(18) |
| C23                   | C22   | C27   | C26   | 0.0(3)      | C23                   | C22   | C27   | C26   | 0.4(3)      |
| C22                   | C23   | C24   | C25   | 0.5(3)      | C22                   | C23   | C24   | C25   | 1.5(3)      |
| C23                   | C24   | C25   | C26   | -0.5(3)     | C23                   | C24   | C25   | C26   | 1.1(3)      |
| C24                   | C25   | C26   | C27   | 0.2(3)      | C24                   | C25   | C26   | C27   | -2.9(3)     |
| C25                   | C26   | C27   | C22   | 0.0(3)      | C25                   | C26   | C27   | C22   | 2.1(3)      |

**Table 6.** Anisotropic Displacement Parameters ( $U_{ij}$ , Å<sup>2</sup>)*(a) Molecule A*

| Atom | $U_{11}$   | $U_{22}$   | $U_{33}$   | $U_{23}$    | $U_{13}$    | $U_{12}$    |
|------|------------|------------|------------|-------------|-------------|-------------|
| O1   | 0.0230(7)  | 0.0294(6)  | 0.0371(7)  | -0.0123(6)  | -0.0046(5)  | 0.0028(5)   |
| N1   | 0.0554(12) | 0.0446(10) | 0.0413(11) | -0.0166(9)  | -0.0004(9)  | 0.0005(9)   |
| C1   | 0.0267(10) | 0.0304(9)  | 0.0293(10) | -0.0075(8)  | -0.0044(7)  | 0.0017(7)   |
| C2   | 0.0304(11) | 0.0319(10) | 0.0419(11) | -0.0111(9)  | -0.0034(8)  | 0.0000(8)   |
| C3   | 0.0302(11) | 0.0400(11) | 0.0548(13) | -0.0108(10) | -0.0004(9)  | -0.0072(9)  |
| C4   | 0.0235(10) | 0.0393(11) | 0.0508(13) | -0.0064(10) | 0.0014(9)   | -0.0035(8)  |
| C5   | 0.0221(10) | 0.0347(10) | 0.0479(12) | -0.0067(9)  | -0.0029(8)  | 0.0007(8)   |
| C6   | 0.0244(10) | 0.0291(9)  | 0.0325(10) | -0.0066(8)  | -0.0013(7)  | -0.0003(7)  |
| C7   | 0.0185(9)  | 0.0286(9)  | 0.0350(10) | -0.0081(8)  | -0.0020(7)  | 0.0023(7)   |
| C8   | 0.0226(9)  | 0.0326(10) | 0.0332(10) | -0.0076(8)  | -0.0002(7)  | -0.0046(7)  |
| C9   | 0.0269(10) | 0.0361(10) | 0.0416(12) | -0.0047(9)  | -0.0030(8)  | -0.0033(8)  |
| C10  | 0.0401(13) | 0.0517(13) | 0.0373(12) | -0.0045(10) | -0.0094(9)  | -0.0034(10) |
| C11  | 0.0416(13) | 0.0577(14) | 0.0334(11) | -0.0142(10) | -0.0025(9)  | -0.0056(10) |
| C12  | 0.0329(11) | 0.0455(12) | 0.0374(11) | -0.0162(9)  | -0.0006(8)  | -0.0050(9)  |
| C13  | 0.0230(10) | 0.0358(10) | 0.0347(10) | -0.0104(8)  | -0.0013(7)  | -0.0036(8)  |
| C14  | 0.0252(10) | 0.0293(9)  | 0.0363(10) | -0.0136(8)  | -0.0020(8)  | -0.0020(7)  |
| C15  | 0.0279(10) | 0.0271(9)  | 0.0391(12) | -0.0111(8)  | 0.0031(8)   | 0.0004(7)   |
| C16  | 0.0258(10) | 0.0297(9)  | 0.0331(10) | -0.0080(8)  | 0.0004(7)   | 0.0005(7)   |
| C17  | 0.0260(10) | 0.0355(10) | 0.0331(10) | -0.0106(8)  | -0.0009(8)  | 0.0012(8)   |
| C18  | 0.0346(11) | 0.0389(11) | 0.0383(11) | -0.0152(9)  | 0.0005(8)   | -0.0056(9)  |
| C19  | 0.0482(14) | 0.0322(11) | 0.0551(14) | -0.0180(10) | 0.0037(10)  | -0.0042(9)  |
| C20  | 0.0384(13) | 0.0359(11) | 0.0718(16) | -0.0190(11) | -0.0003(11) | 0.0083(9)   |
| C21  | 0.0232(10) | 0.0363(11) | 0.0625(14) | -0.0150(10) | -0.0014(9)  | 0.0013(8)   |
| C22  | 0.0255(10) | 0.0302(9)  | 0.0401(11) | -0.0180(8)  | -0.0051(8)  | 0.0015(7)   |
| C23  | 0.0322(11) | 0.0393(11) | 0.0414(12) | -0.0118(9)  | -0.0044(9)  | 0.0010(9)   |
| C24  | 0.0449(13) | 0.0366(11) | 0.0551(14) | -0.0121(10) | -0.0145(10) | 0.0071(9)   |
| C25  | 0.0355(12) | 0.0448(12) | 0.0660(16) | -0.0251(12) | -0.0101(10) | 0.0114(9)   |
| C26  | 0.0340(12) | 0.0500(13) | 0.0561(14) | -0.0221(11) | 0.0015(10)  | 0.0078(10)  |
| C27  | 0.0342(11) | 0.0378(11) | 0.0455(12) | -0.0148(9)  | 0.0005(9)   | 0.0046(9)   |

*(b) Molecule B*

| Atom | $U_{11}$   | $U_{22}$   | $U_{33}$   | $U_{23}$    | $U_{13}$   | $U_{12}$   |
|------|------------|------------|------------|-------------|------------|------------|
| O1   | 0.0222(7)  | 0.0319(7)  | 0.0336(7)  | -0.0112(6)  | 0.0009(5)  | -0.0028(5) |
| N1   | 0.0432(11) | 0.0459(10) | 0.0427(11) | -0.0012(9)  | 0.0004(8)  | 0.0003(8)  |
| C1   | 0.0255(10) | 0.0314(9)  | 0.0280(10) | -0.0052(8)  | -0.0026(7) | -0.0009(7) |
| C2   | 0.0277(10) | 0.0366(10) | 0.0347(11) | -0.0054(8)  | -0.0035(8) | -0.0014(8) |
| C3   | 0.0267(11) | 0.0473(12) | 0.0404(12) | -0.0035(9)  | -0.0004(8) | 0.0020(9)  |
| C4   | 0.0325(12) | 0.0401(11) | 0.0521(13) | -0.0062(10) | 0.0034(9)  | 0.0085(9)  |
| C5   | 0.0334(11) | 0.0347(10) | 0.0435(12) | -0.0121(9)  | 0.0032(9)  | 0.0043(8)  |

**Table 6.** Anisotropic Displacement Parameters (continued)

| Atom | $U_{11}$   | $U_{22}$   | $U_{33}$   | $U_{23}$    | $U_{13}$    | $U_{12}$    |
|------|------------|------------|------------|-------------|-------------|-------------|
| C6   | 0.0247(10) | 0.0298(9)  | 0.0319(10) | -0.0060(8)  | -0.0018(7)  | 0.0016(7)   |
| C7   | 0.0238(10) | 0.0312(9)  | 0.0323(10) | -0.0099(8)  | -0.0001(7)  | -0.0019(7)  |
| C8   | 0.0201(9)  | 0.0319(9)  | 0.0327(10) | -0.0081(8)  | -0.0019(7)  | 0.0024(7)   |
| C9   | 0.0300(10) | 0.0372(10) | 0.0347(11) | -0.0133(8)  | -0.0022(8)  | 0.0024(8)   |
| C10  | 0.0354(11) | 0.0464(12) | 0.0290(10) | -0.0099(9)  | -0.0017(8)  | 0.0052(9)   |
| C11  | 0.0313(11) | 0.0379(11) | 0.0323(11) | -0.0021(8)  | 0.0021(8)   | 0.0037(8)   |
| C12  | 0.0246(10) | 0.0317(10) | 0.0360(11) | -0.0078(8)  | -0.0017(8)  | 0.0017(8)   |
| C13  | 0.0197(9)  | 0.0308(9)  | 0.0337(10) | -0.0089(8)  | -0.0032(7)  | 0.0040(7)   |
| C14  | 0.0226(9)  | 0.0298(9)  | 0.0327(10) | -0.0071(8)  | -0.0008(7)  | -0.0038(7)  |
| C15  | 0.0248(10) | 0.0311(10) | 0.0408(12) | -0.0077(9)  | -0.0031(8)  | 0.0002(8)   |
| C16  | 0.0241(10) | 0.0273(9)  | 0.0344(10) | -0.0061(8)  | -0.0037(7)  | 0.0001(7)   |
| C17  | 0.0273(10) | 0.0365(10) | 0.0422(11) | -0.0106(9)  | 0.0006(8)   | -0.0007(8)  |
| C18  | 0.0245(11) | 0.0429(12) | 0.0524(13) | -0.0074(10) | 0.0042(9)   | -0.0046(9)  |
| C19  | 0.0327(12) | 0.0395(11) | 0.0574(14) | -0.0069(10) | -0.0053(10) | -0.0096(9)  |
| C20  | 0.0473(13) | 0.0392(11) | 0.0486(13) | -0.0170(10) | -0.0074(10) | -0.0079(10) |
| C21  | 0.0355(11) | 0.0395(11) | 0.0392(11) | -0.0124(9)  | 0.0014(9)   | -0.0044(9)  |
| C22  | 0.0336(11) | 0.0304(9)  | 0.0280(10) | -0.0065(8)  | -0.0013(8)  | -0.0012(8)  |
| C23  | 0.0369(12) | 0.0452(12) | 0.0398(12) | -0.0155(10) | -0.0041(9)  | -0.0053(9)  |
| C24  | 0.0610(16) | 0.0559(14) | 0.0410(13) | -0.0214(11) | -0.0025(11) | -0.0153(12) |
| C25  | 0.0787(18) | 0.0402(12) | 0.0428(13) | -0.0191(10) | 0.0061(12)  | -0.0060(12) |
| C26  | 0.0623(16) | 0.0448(13) | 0.0509(14) | -0.0186(11) | -0.0024(11) | 0.0132(11)  |
| C27  | 0.0422(12) | 0.0430(12) | 0.0455(13) | -0.0157(10) | -0.0058(9)  | 0.0062(9)   |

The form of the anisotropic displacement parameter is:

$$\exp[-2\pi^2(h^2a^2U_{11} + k^2b^2U_{22} + l^2c^2U_{33} + 2klb*c*U_{23} + 2hla*c*U_{13} + 2hka*b*U_{12})]$$

**Table 7.** Derived Atomic Coordinates and Displacement Parameters for Hydrogen Atoms

| Atom | <i>x</i> | <i>y</i> | <i>z</i> | $U_{eq}, \text{\AA}^2$ |
|------|----------|----------|----------|------------------------|
| H2A  | 0.1137   | 0.0017   | 0.3546   | 0.042                  |
| H3A  | -0.0796  | -0.0105  | 0.4383   | 0.051                  |
| H3B  | -0.1129  | 0.0588   | 0.3458   | 0.051                  |
| H4A  | -0.0968  | 0.1591   | 0.4732   | 0.048                  |
| H4B  | -0.2013  | 0.1867   | 0.4048   | 0.048                  |
| H5A  | -0.0709  | 0.3633   | 0.3841   | 0.044                  |
| H5B  | -0.0526  | 0.3147   | 0.3077   | 0.044                  |
| H9A  | 0.1013   | 0.5411   | 0.1795   | 0.044                  |
| H10A | 0.1136   | 0.5060   | 0.0531   | 0.054                  |
| H11A | 0.2031   | 0.3280   | 0.0416   | 0.053                  |
| H12A | 0.2848   | 0.1770   | 0.1556   | 0.045                  |
| H17A | 0.4086   | 0.4743   | 0.3735   | 0.038                  |
| H18A | 0.4324   | 0.6630   | 0.3941   | 0.044                  |
| H19A | 0.2590   | 0.7955   | 0.3805   | 0.053                  |
| H20A | 0.0603   | 0.7383   | 0.3463   | 0.058                  |
| H21A | 0.0359   | 0.5506   | 0.3244   | 0.049                  |
| H23A | 0.3220   | -0.0041  | 0.4447   | 0.045                  |
| H24A | 0.4940   | -0.1398  | 0.4715   | 0.055                  |
| H25A | 0.6672   | -0.1088  | 0.3777   | 0.056                  |
| H26A | 0.6658   | 0.0557   | 0.2571   | 0.055                  |
| H27A | 0.4933   | 0.1903   | 0.2299   | 0.047                  |
| H2B  | 0.5877   | 0.4658   | 0.8432   | 0.041                  |
| H3C  | 0.7024   | 0.2729   | 0.8935   | 0.049                  |
| H3D  | 0.6970   | 0.3142   | 0.7967   | 0.049                  |
| H4C  | 0.5715   | 0.1140   | 0.9124   | 0.053                  |
| H4D  | 0.6362   | 0.1199   | 0.8263   | 0.053                  |
| H5C  | 0.4565   | 0.2288   | 0.7582   | 0.045                  |
| H5D  | 0.4096   | 0.1011   | 0.8233   | 0.045                  |
| H9B  | 0.2013   | 0.3123   | 0.6549   | 0.040                  |
| H10B | 0.2679   | 0.4796   | 0.5414   | 0.045                  |
| H11B | 0.3623   | 0.6516   | 0.5587   | 0.043                  |
| H12B | 0.3882   | 0.6635   | 0.6897   | 0.038                  |
| H17B | 0.0254   | 0.2563   | 0.9284   | 0.043                  |
| H18B | -0.1321  | 0.1037   | 0.9542   | 0.050                  |
| H19B | -0.1300  | -0.0323  | 0.8804   | 0.054                  |
| H20B | 0.0309   | -0.0188  | 0.7816   | 0.053                  |
| H21B | 0.1909   | 0.1306   | 0.7571   | 0.046                  |
| H23B | 0.4920   | 0.5588   | 0.9188   | 0.048                  |
| H24B | 0.4772   | 0.7311   | 0.9608   | 0.061                  |
| H25B | 0.2906   | 0.8460   | 0.9439   | 0.063                  |
| H26B | 0.1136   | 0.7836   | 0.8880   | 0.062                  |
| H27B | 0.1308   | 0.6180   | 0.8395   | 0.052                  |

## X-ray Data for Product 13d

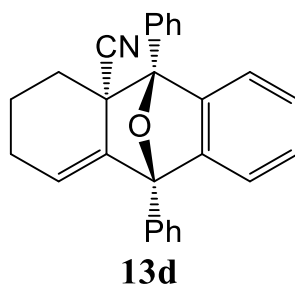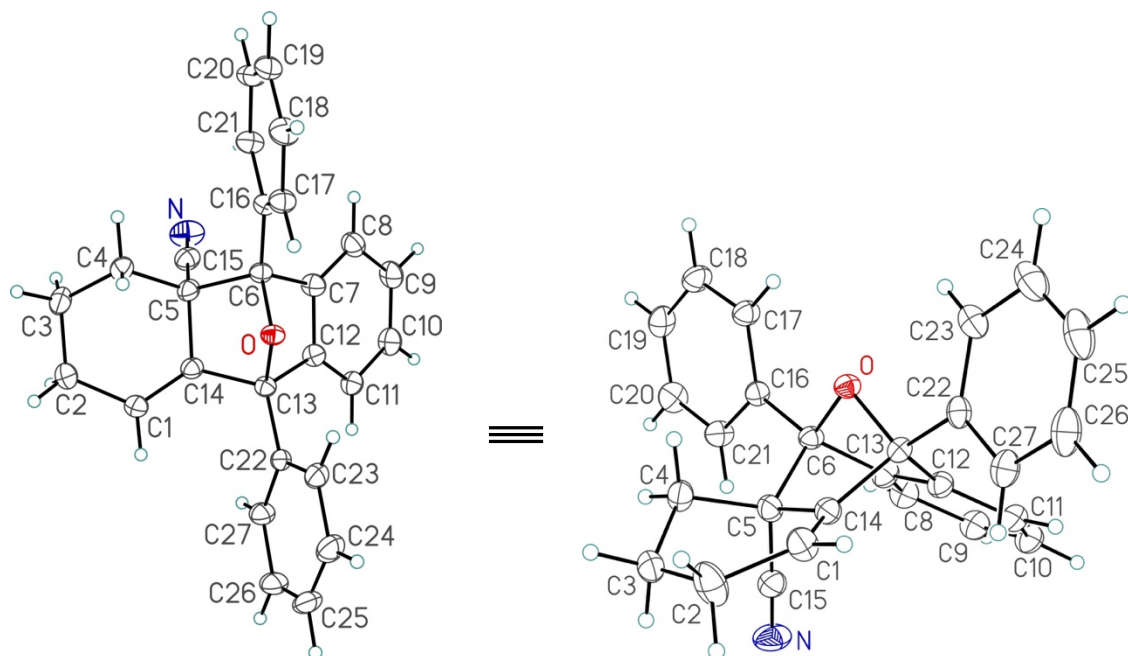

**Table 1.** Crystallographic Experimental Details

### A. Crystal Data

|                                   |                                                                                                          |
|-----------------------------------|----------------------------------------------------------------------------------------------------------|
| formula                           | C <sub>27</sub> H <sub>21</sub> NO                                                                       |
| formula weight                    | 375.45                                                                                                   |
| crystal dimensions (mm)           | 0.34 × 0.21 × 0.06                                                                                       |
| crystal system                    | monoclinic                                                                                               |
| space group                       | <i>P</i> 2 <sub>1</sub> / <i>n</i> (an alternate setting of <i>P</i> 2 <sub>1</sub> / <i>c</i> [No. 14]) |
| unit cell parameters <sup>a</sup> |                                                                                                          |
| <i>a</i> (Å)                      | 14.8685 (8)                                                                                              |
| <i>b</i> (Å)                      | 8.0336 (4)                                                                                               |
| <i>c</i> (Å)                      | 16.4560 (9)                                                                                              |
| β (deg)                           | 93.1431 (7)                                                                                              |
| <i>V</i> (Å <sup>3</sup> )        | 1962.67 (18)                                                                                             |
| <i>Z</i>                          | 4                                                                                                        |

|                                             |       |
|---------------------------------------------|-------|
| $\rho_{\text{calcd}}$ (g cm <sup>-3</sup> ) | 1.271 |
| $\mu$ (mm <sup>-1</sup> )                   | 0.077 |

*B. Data Collection and Refinement Conditions*

|                                                      |                                                                              |
|------------------------------------------------------|------------------------------------------------------------------------------|
| diffractometer                                       | Bruker PLATFORM/APEX II CCD <sup>b</sup>                                     |
| radiation ( $\lambda$ [Å])                           | graphite-monochromated Mo K $\alpha$ (0.71073)                               |
| temperature (°C)                                     | -80                                                                          |
| scan type                                            | $\omega$ scans (0.3°) (15 s exposures)                                       |
| data collection $2\theta$ limit (deg)                | 52.89                                                                        |
| total data collected                                 | 14714 ( $-18 \leq h \leq 18$ , $-10 \leq k \leq 10$ , $-20 \leq l \leq 20$ ) |
| independent reflections                              | 4038 ( $R_{\text{int}} = 0.0358$ )                                           |
| number of observed reflections ( <i>NO</i> )         | 3140 [ $F_o^2 \geq 2\sigma(F_o^2)$ ]                                         |
| structure solution method                            | direct methods/dual space ( <i>SHELXD</i> <sup>c</sup> )                     |
| refinement method                                    | full-matrix least-squares on $F^2$ ( <i>SHELXL-2014</i> <sup>d</sup> )       |
| absorption correction method                         | Gaussian integration (face-indexed)                                          |
| range of transmission factors                        | 1.0000–0.9012                                                                |
| data/restraints/parameters                           | 4038 / 0 / 262                                                               |
| goodness-of-fit ( <i>S</i> ) <sup>e</sup> [all data] | 1.078                                                                        |
| final <i>R</i> indices <sup>f</sup>                  |                                                                              |
| $R_1$ [ $F_o^2 \geq 2\sigma(F_o^2)$ ]                | 0.0562                                                                       |
| $wR_2$ [all data]                                    | 0.1652                                                                       |
| largest difference peak and hole                     | 0.779 and -0.282 e Å <sup>-3</sup>                                           |

<sup>a</sup>Obtained from least-squares refinement of 5004 reflections with  $4.96^\circ < 2\theta < 51.46^\circ$ .

<sup>b</sup>Programs for diffractometer operation, data collection, data reduction and absorption correction were those supplied by Bruker.

<sup>c</sup>Schneider, T. R.; Sheldrick, G. M. *Acta Crystallogr.* **2002**, *D58*, 1772-1779.

<sup>d</sup>Sheldrick, G. M. *Acta Crystallogr.* **2015**, *C71*, 3–8.

<sup>e</sup> $S = [\sum w(F_o^2 - F_c^2)^2 / (n - p)]^{1/2}$  ( $n$  = number of data;  $p$  = number of parameters varied;  $w = [\sigma^2(F_o^2) + (0.0809P)^2 + 0.8151P]^{-1}$  where  $P = [\text{Max}(F_o^2, 0) + 2F_c^2]/3$ ).

<sup>f</sup> $R_1 = \sum ||F_o| - |F_c|| / \sum |F_o|$ ;  $wR_2 = [\sum w(F_o^2 - F_c^2)^2 / \sum w(F_o^4)]^{1/2}$ .

**Table 2.** Atomic Coordinates and Equivalent Isotropic Displacement Parameters

| Atom | x            | y           | z           | $U_{\text{eq}}$ , Å <sup>2</sup> |
|------|--------------|-------------|-------------|----------------------------------|
| O    | 0.12733(8)   | 0.16615(15) | 0.48272(7)  | 0.0285(3)*                       |
| N    | 0.39612(14)  | -0.1294(3)  | 0.52544(13) | 0.0578(6)*                       |
| C1   | 0.30903(14)  | 0.2916(3)   | 0.38548(12) | 0.0396(5)*                       |
| C2   | 0.39145(17)  | 0.3671(4)   | 0.42596(15) | 0.0568(7)*                       |
| C3   | 0.40635(14)  | 0.3337(3)   | 0.51482(13) | 0.0430(5)*                       |
| C4   | 0.32413(14)  | 0.2703(3)   | 0.55586(12) | 0.0377(5)*                       |
| C5   | 0.28197(13)  | 0.1245(3)   | 0.50916(11) | 0.0345(4)*                       |
| C6   | 0.18588(12)  | 0.0624(2)   | 0.53356(11) | 0.0283(4)*                       |
| C7   | 0.17075(14)  | -0.1058(2)  | 0.49067(12) | 0.0353(4)*                       |
| C8   | 0.16660(15)  | -0.2675(3)  | 0.51641(14) | 0.0425(5)*                       |
| C9   | 0.15235(15)  | -0.3918(3)  | 0.45727(14) | 0.0437(5)*                       |
| C10  | 0.14280(15)  | -0.3515(3)  | 0.37498(14) | 0.0428(5)*                       |
| C11  | 0.14471(13)  | -0.1846(2)  | 0.34977(13) | 0.0358(4)*                       |
| C12  | 0.15831(13)  | -0.0651(2)  | 0.40817(11) | 0.0330(4)*                       |
| C13  | 0.16217(12)  | 0.1243(2)   | 0.40351(10) | 0.0276(4)*                       |
| C14  | 0.25940(12)  | 0.1805(2)   | 0.42192(11) | 0.0319(4)*                       |
| C15  | 0.34703(14)  | -0.0185(3)  | 0.51652(12) | 0.0406(5)*                       |
| C16  | 0.16781(12)  | 0.0759(2)   | 0.62189(11) | 0.0297(4)*                       |
| C17  | 0.09843(13)  | 0.1729(3)   | 0.64883(12) | 0.0359(4)*                       |
| C18  | 0.08543(15)  | 0.1849(3)   | 0.73168(13) | 0.0441(5)*                       |
| C19  | 0.14030(15)  | 0.1001(3)   | 0.78776(13) | 0.0444(5)*                       |
| C20  | 0.20952(16)  | 0.0020(3)   | 0.76106(13) | 0.0448(5)*                       |
| C21  | 0.22303(14)  | -0.0100(3)  | 0.67895(12) | 0.0393(5)*                       |
| C22  | 0.10887(13)  | 0.2045(2)   | 0.33437(11) | 0.0311(4)*                       |
| C23  | 0.02467(14)  | 0.2724(3)   | 0.34571(13) | 0.0402(5)*                       |
| C24  | -0.02312(16) | 0.3499(3)   | 0.28124(16) | 0.0528(6)*                       |
| C25  | 0.01247(19)  | 0.3604(3)   | 0.20600(15) | 0.0569(7)*                       |
| C26  | 0.09520(19)  | 0.2892(3)   | 0.19322(14) | 0.0532(6)*                       |
| C27  | 0.14311(16)  | 0.2091(3)   | 0.25732(12) | 0.0417(5)*                       |

Anisotropically-refined atoms are marked with an asterisk (\*). The form of the anisotropic displacement parameter is:  $\exp[-2\pi^2(h^2a^{*2}U_{11} + k^2b^{*2}U_{22} + l^2c^{*2}U_{33} + 2klb^{*c^*}U_{23} + 2hla^{*c^*}U_{13} + 2hka^{*b^*}U_{12})]$ .



**Table 3.** Selected Interatomic Distances (Å)

| Atom1 | Atom2 | Distance | Atom1 | Atom2 | Distance |
|-------|-------|----------|-------|-------|----------|
| O     | C6    | 1.440(2) | C10   | C11   | 1.405(3) |
| O     | C13   | 1.468(2) | C11   | C12   | 1.366(3) |
| N     | C15   | 1.156(3) | C12   | C13   | 1.525(3) |
| C1    | C2    | 1.491(3) | C13   | C14   | 1.529(3) |
| C1    | C14   | 1.323(3) | C13   | C22   | 1.496(2) |
| C2    | C3    | 1.491(3) | C16   | C17   | 1.385(3) |
| C3    | C4    | 1.517(3) | C16   | C21   | 1.395(3) |
| C4    | C5    | 1.518(3) | C17   | C18   | 1.391(3) |
| C5    | C6    | 1.585(3) | C18   | C19   | 1.378(3) |
| C5    | C14   | 1.524(3) | C19   | C20   | 1.386(3) |
| C5    | C15   | 1.502(3) | C20   | C21   | 1.380(3) |
| C6    | C7    | 1.535(3) | C22   | C23   | 1.388(3) |
| C6    | C16   | 1.496(2) | C22   | C27   | 1.392(3) |
| C7    | C8    | 1.369(3) | C23   | C24   | 1.391(3) |
| C7    | C12   | 1.399(3) | C24   | C25   | 1.375(4) |
| C8    | C9    | 1.402(3) | C25   | C26   | 1.383(4) |
| C9    | C10   | 1.392(3) | C26   | C27   | 1.397(3) |

**Table 4.** Selected Interatomic Angles (deg)

| Atom1 | Atom2 | Atom3 | Angle      | Atom1 | Atom2 | Atom3 | Angle      |
|-------|-------|-------|------------|-------|-------|-------|------------|
| C6    | O     | C13   | 98.74(12)  | O     | C13   | C12   | 99.65(13)  |
| C2    | C1    | C14   | 122.50(19) | O     | C13   | C14   | 97.61(13)  |
| C1    | C2    | C3    | 116.04(18) | O     | C13   | C22   | 112.27(14) |
| C2    | C3    | C4    | 114.65(18) | C12   | C13   | C14   | 108.79(15) |
| C3    | C4    | C5    | 110.76(16) | C12   | C13   | C22   | 116.60(15) |
| C4    | C5    | C6    | 117.87(16) | C14   | C13   | C22   | 118.66(15) |
| C4    | C5    | C14   | 108.22(16) | C1    | C14   | C5    | 121.78(17) |
| C4    | C5    | C15   | 107.64(16) | C1    | C14   | C13   | 130.86(18) |
| C6    | C5    | C14   | 100.16(14) | C5    | C14   | C13   | 104.87(15) |
| C6    | C5    | C15   | 108.93(16) | N     | C15   | C5    | 177.2(2)   |
| C14   | C5    | C15   | 114.15(16) | C6    | C16   | C17   | 121.88(17) |
| O     | C6    | C5    | 101.27(14) | C6    | C16   | C21   | 119.18(16) |
| O     | C6    | C7    | 100.00(14) | C17   | C16   | C21   | 118.93(18) |
| O     | C6    | C16   | 112.81(14) | C16   | C17   | C18   | 119.92(19) |
| C5    | C6    | C7    | 105.77(15) | C17   | C18   | C19   | 120.9(2)   |
| C5    | C6    | C16   | 115.82(15) | C18   | C19   | C20   | 119.41(19) |
| C7    | C6    | C16   | 118.71(15) | C19   | C20   | C21   | 120.0(2)   |
| C6    | C7    | C8    | 134.51(19) | C16   | C21   | C20   | 120.82(19) |
| C6    | C7    | C12   | 104.39(15) | C13   | C22   | C23   | 120.73(17) |
| C8    | C7    | C12   | 121.09(19) | C13   | C22   | C27   | 119.94(18) |
| C7    | C8    | C9    | 118.0(2)   | C23   | C22   | C27   | 119.32(18) |
| C8    | C9    | C10   | 120.87(19) | C22   | C23   | C24   | 120.0(2)   |
| C9    | C10   | C11   | 120.44(19) | C23   | C24   | C25   | 120.6(2)   |
| C10   | C11   | C12   | 117.90(19) | C24   | C25   | C26   | 120.1(2)   |
| C7    | C12   | C11   | 121.69(18) | C25   | C26   | C27   | 119.8(2)   |
| C7    | C12   | C13   | 106.19(16) | C22   | C27   | C26   | 120.2(2)   |
| C11   | C12   | C13   | 132.12(18) |       |       |       |            |

**Table 5.** Torsional Angles (deg)

| Atom1 | Atom2 | Atom3 | Atom4 | Angle       | Atom1 | Atom2 | Atom3 | Atom4 | Angle       |
|-------|-------|-------|-------|-------------|-------|-------|-------|-------|-------------|
| C13   | O     | C6    | C5    | 55.47(15)   | C7    | C6    | C16   | C21   | 67.4(2)     |
| C13   | O     | C6    | C7    | -52.98(15)  | C6    | C7    | C8    | C9    | -179.2(2)   |
| C13   | O     | C6    | C16   | 179.91(14)  | C12   | C7    | C8    | C9    | 2.0(3)      |
| C6    | O     | C13   | C12   | 51.30(15)   | C6    | C7    | C12   | C11   | 178.55(17)  |
| C6    | O     | C13   | C14   | -59.33(15)  | C6    | C7    | C12   | C13   | -2.3(2)     |
| C6    | O     | C13   | C22   | 175.38(14)  | C8    | C7    | C12   | C11   | -2.3(3)     |
| C14   | C1    | C2    | C3    | -10.4(4)    | C8    | C7    | C12   | C13   | 176.82(19)  |
| C2    | C1    | C14   | C5    | 1.5(3)      | C7    | C8    | C9    | C10   | 0.0(3)      |
| C2    | C1    | C14   | C13   | 160.7(2)    | C8    | C9    | C10   | C11   | -1.8(3)     |
| C1    | C2    | C3    | C4    | -16.4(3)    | C9    | C10   | C11   | C12   | 1.5(3)      |
| C2    | C3    | C4    | C5    | 50.5(3)     | C10   | C11   | C12   | C7    | 0.5(3)      |
| C3    | C4    | C5    | C6    | -169.25(17) | C10   | C11   | C12   | C13   | -178.40(19) |
| C3    | C4    | C5    | C14   | -56.7(2)    | C7    | C12   | C13   | O     | -29.89(18)  |
| C3    | C4    | C5    | C15   | 67.2(2)     | C7    | C12   | C13   | C14   | 71.63(19)   |
| C4    | C5    | C6    | O     | 88.40(19)   | C7    | C12   | C13   | C22   | -150.89(17) |
| C4    | C5    | C6    | C7    | -167.69(16) | C11   | C12   | C13   | O     | 149.1(2)    |
| C4    | C5    | C6    | C16   | -34.0(2)    | C11   | C12   | C13   | C14   | -109.3(2)   |
| C14   | C5    | C6    | O     | -28.59(17)  | C11   | C12   | C13   | C22   | 28.1(3)     |
| C14   | C5    | C6    | C7    | 75.31(17)   | O     | C13   | C14   | C1    | -121.7(2)   |
| C14   | C5    | C6    | C16   | -150.97(16) | O     | C13   | C14   | C5    | 40.11(17)   |
| C15   | C5    | C6    | O     | -148.65(15) | C12   | C13   | C14   | C1    | 135.3(2)    |
| C15   | C5    | C6    | C7    | -44.75(19)  | C12   | C13   | C14   | C5    | -62.84(18)  |
| C15   | C5    | C6    | C16   | 88.97(19)   | C22   | C13   | C14   | C1    | -1.1(3)     |
| C4    | C5    | C14   | C1    | 32.5(3)     | C22   | C13   | C14   | C5    | 160.69(16)  |
| C4    | C5    | C14   | C13   | -131.44(16) | O     | C13   | C22   | C23   | -15.1(2)    |
| C6    | C5    | C14   | C1    | 156.43(19)  | O     | C13   | C22   | C27   | 165.94(16)  |
| C6    | C5    | C14   | C13   | -7.47(18)   | C12   | C13   | C22   | C23   | 99.0(2)     |
| C15   | C5    | C14   | C1    | -87.4(2)    | C12   | C13   | C22   | C27   | -80.0(2)    |
| C15   | C5    | C14   | C13   | 108.73(18)  | C14   | C13   | C22   | C23   | -127.84(19) |
| O     | C6    | C7    | C8    | -144.4(2)   | C14   | C13   | C22   | C27   | 53.2(2)     |
| O     | C6    | C7    | C12   | 34.50(18)   | C6    | C16   | C17   | C18   | -178.48(19) |
| C5    | C6    | C7    | C8    | 110.7(3)    | C21   | C16   | C17   | C18   | 0.7(3)      |
| C5    | C6    | C7    | C12   | -70.33(18)  | C6    | C16   | C21   | C20   | 178.72(19)  |
| C16   | C6    | C7    | C8    | -21.4(3)    | C17   | C16   | C21   | C20   | -0.5(3)     |
| C16   | C6    | C7    | C12   | 157.55(16)  | C16   | C17   | C18   | C19   | -0.6(3)     |
| O     | C6    | C16   | C17   | 3.0(2)      | C17   | C18   | C19   | C20   | 0.2(3)      |
| O     | C6    | C16   | C21   | -176.13(16) | C18   | C19   | C20   | C21   | 0.0(3)      |
| C5    | C6    | C16   | C17   | 119.1(2)    | C19   | C20   | C21   | C16   | 0.1(3)      |
| C5    | C6    | C16   | C21   | -60.1(2)    | C13   | C22   | C23   | C24   | 178.48(19)  |
| C7    | C6    | C16   | C17   | -113.4(2)   | C27   | C22   | C23   | C24   | -2.5(3)     |

**Table 5.** Torsional Angles (continued)

| Atom1 | Atom2 | Atom3 | Atom4 | Angle       | Atom1 | Atom2 | Atom3 | Atom4 | Angle   |
|-------|-------|-------|-------|-------------|-------|-------|-------|-------|---------|
| C13   | C22   | C27   | C26   | -177.57(19) | C23   | C24   | C25   | C26   | 1.9(4)  |
| C23   | C22   | C27   | C26   | 3.4(3)      | C24   | C25   | C26   | C27   | -1.0(4) |
| C22   | C23   | C24   | C25   | -0.1(3)     | C25   | C26   | C27   | C22   | -1.7(3) |

**Table 6.** Anisotropic Displacement Parameters ( $U_{ij}$ , Å<sup>2</sup>)

| Atom | $U_{11}$   | $U_{22}$   | $U_{33}$   | $U_{23}$    | $U_{13}$    | $U_{12}$    |
|------|------------|------------|------------|-------------|-------------|-------------|
| O    | 0.0301(7)  | 0.0298(7)  | 0.0256(7)  | 0.0026(5)   | 0.0023(5)   | 0.0055(5)   |
| N    | 0.0525(12) | 0.0685(14) | 0.0526(12) | 0.0030(10)  | 0.0043(9)   | 0.0301(11)  |
| C1   | 0.0389(11) | 0.0471(12) | 0.0327(10) | 0.0052(9)   | 0.0018(8)   | -0.0050(9)  |
| C2   | 0.0483(13) | 0.0734(18) | 0.0483(14) | 0.0130(12)  | -0.0008(11) | -0.0271(12) |
| C3   | 0.0353(11) | 0.0512(13) | 0.0425(12) | -0.0106(10) | 0.0023(9)   | -0.0094(9)  |
| C4   | 0.0405(11) | 0.0391(11) | 0.0331(10) | -0.0047(8)  | -0.0005(8)  | -0.0044(9)  |
| C5   | 0.0297(10) | 0.0460(12) | 0.0280(10) | -0.0019(8)  | 0.0018(7)   | -0.0034(8)  |
| C6   | 0.0284(9)  | 0.0292(9)  | 0.0272(9)  | 0.0019(7)   | 0.0013(7)   | 0.0052(7)   |
| C7   | 0.0431(11) | 0.0285(10) | 0.0345(10) | -0.0004(8)  | 0.0028(8)   | 0.0033(8)   |
| C8   | 0.0465(12) | 0.0362(11) | 0.0451(12) | 0.0050(9)   | 0.0041(9)   | -0.0035(9)  |
| C9   | 0.0490(12) | 0.0237(10) | 0.0583(14) | 0.0008(9)   | 0.0026(10)  | -0.0003(9)  |
| C10  | 0.0459(12) | 0.0297(10) | 0.0527(13) | -0.0087(9)  | 0.0035(10)  | -0.0004(9)  |
| C11  | 0.0360(10) | 0.0349(10) | 0.0367(11) | -0.0053(8)  | 0.0024(8)   | 0.0000(8)   |
| C12  | 0.0356(10) | 0.0296(10) | 0.0335(10) | -0.0013(8)  | 0.0009(8)   | 0.0028(8)   |
| C13  | 0.0308(9)  | 0.0272(9)  | 0.0250(9)  | -0.0017(7)  | 0.0031(7)   | 0.0009(7)   |
| C14  | 0.0303(9)  | 0.0383(10) | 0.0272(9)  | -0.0009(8)  | 0.0022(7)   | 0.0009(8)   |
| C15  | 0.0386(11) | 0.0489(13) | 0.0344(11) | -0.0028(9)  | 0.0028(8)   | 0.0031(10)  |
| C16  | 0.0309(9)  | 0.0318(9)  | 0.0267(9)  | 0.0014(7)   | 0.0033(7)   | -0.0015(8)  |
| C17  | 0.0372(10) | 0.0392(11) | 0.0317(10) | 0.0002(8)   | 0.0047(8)   | 0.0042(8)   |
| C18  | 0.0455(12) | 0.0505(13) | 0.0376(11) | -0.0050(9)  | 0.0135(9)   | 0.0021(10)  |
| C19  | 0.0523(13) | 0.0536(13) | 0.0281(10) | -0.0001(9)  | 0.0090(9)   | -0.0100(10) |
| C20  | 0.0510(12) | 0.0525(13) | 0.0308(10) | 0.0105(9)   | 0.0018(9)   | -0.0001(10) |
| C21  | 0.0413(11) | 0.0435(12) | 0.0332(10) | 0.0060(9)   | 0.0038(8)   | 0.0070(9)   |
| C22  | 0.0367(10) | 0.0263(9)  | 0.0297(9)  | 0.0009(7)   | -0.0041(7)  | -0.0059(8)  |
| C23  | 0.0362(11) | 0.0391(11) | 0.0442(11) | 0.0042(9)   | -0.0066(9)  | -0.0026(9)  |
| C24  | 0.0460(13) | 0.0485(13) | 0.0617(16) | 0.0068(11)  | -0.0181(11) | 0.0008(10)  |
| C25  | 0.0695(17) | 0.0483(14) | 0.0493(14) | 0.0121(11)  | -0.0296(12) | -0.0081(12) |
| C26  | 0.0749(17) | 0.0532(14) | 0.0300(11) | 0.0048(10)  | -0.0102(11) | -0.0141(12) |
| C27  | 0.0526(13) | 0.0426(12) | 0.0295(10) | 0.0000(9)   | -0.0015(9)  | -0.0044(10) |

The form of the anisotropic displacement parameter is:

$$\exp[-2\pi^2(h^2a^2U_{11} + k^2b^2U_{22} + l^2c^2U_{33} + 2klb*c*U_{23} + 2hla*c*U_{13} + 2hka*b*U_{12})]$$

**Table 7.** Derived Atomic Coordinates and Displacement Parameters for Hydrogen Atoms

| Atom | <i>x</i> | <i>y</i> | <i>z</i> | $U_{\text{eq}}, \text{\AA}^2$ |
|------|----------|----------|----------|-------------------------------|
| H1   | 0.2915   | 0.3246   | 0.3315   | 0.047                         |
| H2A  | 0.3885   | 0.4891   | 0.4178   | 0.068                         |
| H2B  | 0.4445   | 0.3259   | 0.3982   | 0.068                         |
| H3A  | 0.4270   | 0.4377   | 0.5421   | 0.052                         |
| H3B  | 0.4552   | 0.2506   | 0.5227   | 0.052                         |
| H4A  | 0.2794   | 0.3611   | 0.5588   | 0.045                         |
| H4B  | 0.3418   | 0.2350   | 0.6121   | 0.045                         |
| H8   | 0.1732   | -0.2947  | 0.5726   | 0.051                         |
| H9   | 0.1492   | -0.5050  | 0.4736   | 0.052                         |
| H10  | 0.1349   | -0.4375  | 0.3356   | 0.051                         |
| H11  | 0.1368   | -0.1557  | 0.2939   | 0.043                         |
| H17  | 0.0598   | 0.2312   | 0.6108   | 0.043                         |
| H18  | 0.0381   | 0.2524   | 0.7498   | 0.053                         |
| H19  | 0.1308   | 0.1087   | 0.8442   | 0.053                         |
| H20  | 0.2477   | -0.0569  | 0.7993   | 0.054                         |
| H21  | 0.2705   | -0.0775  | 0.6611   | 0.047                         |
| H23  | -0.0004  | 0.2659   | 0.3975   | 0.048                         |
| H24  | -0.0808  | 0.3960   | 0.2892   | 0.063                         |
| H25  | -0.0198  | 0.4165   | 0.1628   | 0.068                         |
| H26  | 0.1194   | 0.2949   | 0.1410   | 0.064                         |
| H27  | 0.1992   | 0.1576   | 0.2483   | 0.050                         |

## X-ray Data for Product 16a

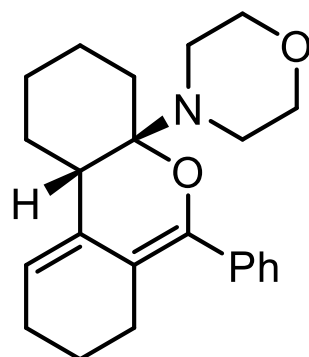

**16a**

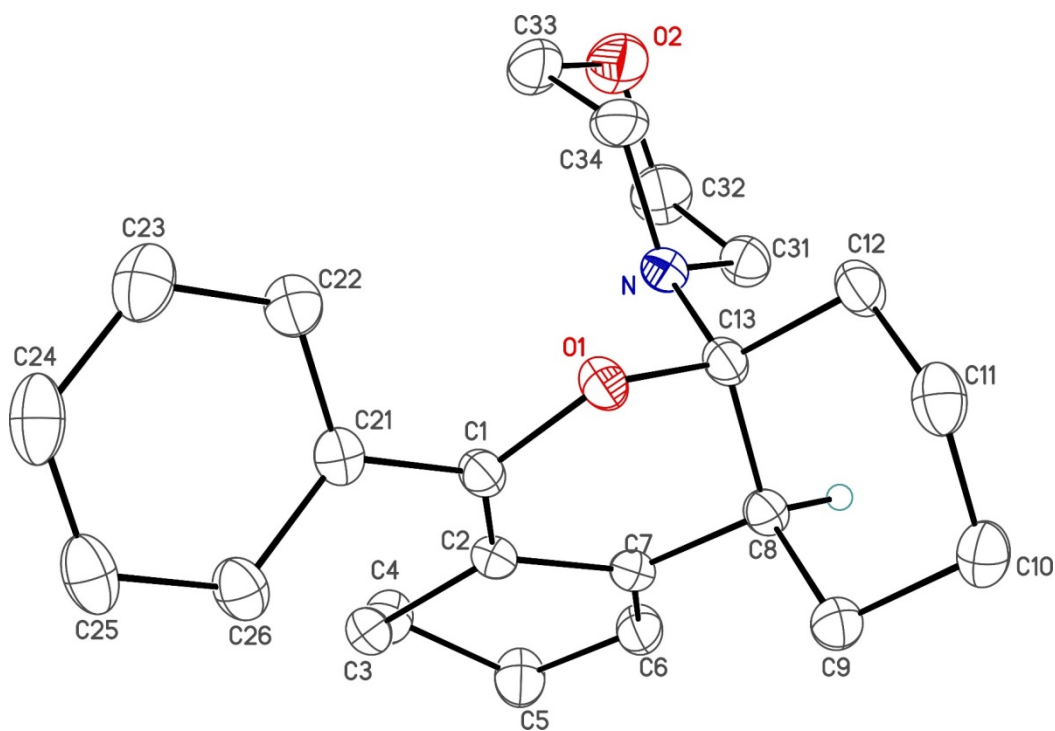

**Table 1.** Crystallographic Experimental Details

### A. Crystal Data

|                                          |                                                 |
|------------------------------------------|-------------------------------------------------|
| formula                                  | C <sub>23</sub> H <sub>29</sub> NO <sub>2</sub> |
| formula weight                           | 351.47                                          |
| crystal dimensions (mm)                  | 0.36 × 0.27 × 0.26                              |
| crystal system                           | monoclinic                                      |
| space group                              | <i>P</i> 2 <sub>1</sub> / <i>c</i> (No. 14)     |
| unit cell parameters <sup>a</sup>        |                                                 |
| <i>a</i> (Å)                             | 15.4338(3)                                      |
| <i>b</i> (Å)                             | 8.3344(2)                                       |
| <i>c</i> (Å)                             | 16.0463(3)                                      |
| β (deg)                                  | 110.5183(8)                                     |
| <i>V</i> (Å <sup>3</sup> )               | 1933.12(7)                                      |
| <i>Z</i>                                 | 4                                               |
| ρ <sub>calcd</sub> (g cm <sup>-3</sup> ) | 1.208                                           |
| μ (mm <sup>-1</sup> )                    | 0.593                                           |

### B. Data Collection and Refinement Conditions

|                                                                                                        |                                                                                        |
|--------------------------------------------------------------------------------------------------------|----------------------------------------------------------------------------------------|
| diffractometer                                                                                         | Bruker D8/APEX II CCD <sup>b</sup>                                                     |
| radiation (λ [Å])                                                                                      | Cu Kα (1.54178) (microfocus source)                                                    |
| temperature (°C)                                                                                       | -80                                                                                    |
| scan type                                                                                              | ω and φ scans (1.0°) (5 s exposures)                                                   |
| data collection 2θ limit (deg)                                                                         | 149.93                                                                                 |
| total data collected                                                                                   | 66578 (-19 ≤ <i>h</i> ≤ 19, -9 ≤ <i>k</i> ≤ 10, -19 ≤ <i>l</i> ≤ 19)                   |
| independent reflections                                                                                | 3902 ( <i>R</i> <sub>int</sub> = 0.0480)                                               |
| number of observed reflections ( <i>NO</i> )                                                           | 3560 [ <i>F</i> <sub>o</sub> <sup>2</sup> ≥ 2σ( <i>F</i> <sub>o</sub> <sup>2</sup> )]  |
| structure solution method                                                                              | intrinsic phasing ( <i>SHELXT-2014</i> <sup>c</sup> )                                  |
| refinement method                                                                                      | full-matrix least-squares on <i>F</i> <sup>2</sup> ( <i>SHELXL-2017</i> <sup>d</sup> ) |
| absorption correction method                                                                           | Gaussian integration (face-indexed)                                                    |
| range of transmission factors                                                                          | 0.9621–0.7950                                                                          |
| data/restraints/parameters                                                                             | 3902 / 0 / 239                                                                         |
| goodness-of-fit ( <i>S</i> ) <sup>e</sup> [all data]                                                   | 1.103                                                                                  |
| final <i>R</i> indices <sup>f</sup>                                                                    |                                                                                        |
| <i>R</i> <sub>1</sub> [ <i>F</i> <sub>o</sub> <sup>2</sup> ≥ 2σ( <i>F</i> <sub>o</sub> <sup>2</sup> )] | 0.0430                                                                                 |
| <i>wR</i> <sub>2</sub> [all data]                                                                      | 0.1286                                                                                 |
| largest difference peak and hole                                                                       | 0.183 and -0.213 e Å <sup>-3</sup>                                                     |

<sup>a</sup>Obtained from least-squares refinement of 9802 reflections with 6.12° < 2θ < 148.34°.

<sup>b</sup>Programs for diffractometer operation, data collection, data reduction and absorption correction were those supplied by Bruker.

(continued)

**Table 1.** Crystallographic Experimental Details (continued)



<sup>c</sup>Sheldrick, G. M. *Acta Crystallogr.* **2015**, *A71*, 3–8. (SHELXT-2014)

<sup>d</sup>Sheldrick, G. M. *Acta Crystallogr.* **2015**, *C71*, 3–8. (SHELXL-2017)

<sup>e</sup> $S = [\Sigma w(F_o^2 - F_c^2)^2 / (n - p)]^{1/2}$  ( $n$  = number of data;  $p$  = number of parameters varied;  $w = [\sigma^2(F_o^2) + (0.0673P)^2 + 0.4530P]^{-1}$  where  $P = [\text{Max}(F_o^2, 0) + 2F_c^2] / 3$ ).

<sup>f</sup> $R_1 = \Sigma ||F_o| - |F_c|| / \Sigma |F_o|$ ;  $wR_2 = [\Sigma w(F_o^2 - F_c^2)^2 / \Sigma w(F_o^4)]^{1/2}$ .

**Table 2.** Atomic Coordinates and Equivalent Isotropic Displacement Parameters

| Atom | x           | y            | z           | $U_{eq}, \text{\AA}^2$ |
|------|-------------|--------------|-------------|------------------------|
| O1   | 0.71104(5)  | 0.37267(10)  | 0.68193(5)  | 0.0344(2)*             |
| O2   | 0.53163(9)  | -0.12043(17) | 0.69359(9)  | 0.0693(4)*             |
| N    | 0.64683(7)  | 0.11503(13)  | 0.65666(7)  | 0.0359(3)*             |
| C1   | 0.78813(8)  | 0.34536(14)  | 0.75709(7)  | 0.0313(3)*             |
| C2   | 0.84835(8)  | 0.22543(14)  | 0.76283(7)  | 0.0309(3)*             |
| C3   | 0.92586(8)  | 0.18042(16)  | 0.84794(8)  | 0.0359(3)*             |
| C4   | 0.93700(10) | -0.00132(17) | 0.85492(9)  | 0.0436(3)*             |
| C5   | 0.95663(11) | -0.0698(2)   | 0.77551(9)  | 0.0513(4)*             |
| C6   | 0.88951(9)  | -0.00518(17) | 0.68988(9)  | 0.0410(3)*             |
| C7   | 0.83861(8)  | 0.12677(15)  | 0.68487(8)  | 0.0322(3)*             |
| C8   | 0.76949(8)  | 0.18703(14)  | 0.59835(8)  | 0.0322(3)*             |
| H8   | 0.7525(9)   | 0.0988(17)   | 0.5553(9)   | 0.032(3)               |
| C9   | 0.80872(9)  | 0.32148(17)  | 0.55623(8)  | 0.0397(3)*             |
| C10  | 0.73538(10) | 0.38577(17)  | 0.47183(9)  | 0.0443(3)*             |
| C11  | 0.65370(11) | 0.45178(17)  | 0.49318(9)  | 0.0472(3)*             |
| C12  | 0.61212(9)  | 0.32224(17)  | 0.53497(8)  | 0.0408(3)*             |
| C13  | 0.68338(8)  | 0.24444(14)  | 0.61675(8)  | 0.0325(3)*             |
| C21  | 0.79393(8)  | 0.46500(14)  | 0.82682(8)  | 0.0335(3)*             |
| C22  | 0.71454(10) | 0.51525(16)  | 0.84195(9)  | 0.0411(3)*             |
| C23  | 0.71993(12) | 0.62699(18)  | 0.90769(10) | 0.0509(4)*             |
| C24  | 0.80441(12) | 0.68916(16)  | 0.95970(9)  | 0.0516(4)*             |
| C25  | 0.88332(12) | 0.64203(17)  | 0.94491(9)  | 0.0500(4)*             |
| C26  | 0.87858(10) | 0.53197(16)  | 0.87855(9)  | 0.0423(3)*             |
| C31  | 0.63129(10) | -0.04054(16) | 0.61192(9)  | 0.0424(3)*             |
| C32  | 0.60945(13) | -0.1643(2)   | 0.67040(13) | 0.0620(4)*             |
| C33  | 0.54912(12) | 0.0305(3)    | 0.73736(11) | 0.0661(5)*             |
| C34  | 0.56526(10) | 0.1582(2)    | 0.67802(10) | 0.0510(4)*             |

Anisotropically-refined atoms are marked with an asterisk (\*). The form of the anisotropic displacement parameter is:  $\exp[-2\pi^2(h^2a^{*2}U_{11} + k^2b^{*2}U_{22} + l^2c^{*2}U_{33} + 2klb^{*c^{*}}U_{23} + 2hla^{*c^{*}}U_{13} + 2hka^{*b^{*}}U_{12})]$ .

**Table 3.** Selected Interatomic Distances (Å)

| Atom1 | Atom2 | Distance   | Atom1 | Atom2 | Distance   |
|-------|-------|------------|-------|-------|------------|
| O1    | C1    | 1.3842(14) | C8    | C9    | 1.5381(17) |
| O1    | C13   | 1.4510(14) | C8    | C13   | 1.5354(16) |
| O2    | C32   | 1.424(2)   | C8    | H8    | 0.980(14)  |
| O2    | C33   | 1.420(2)   | C9    | C10   | 1.5258(18) |
| N     | C13   | 1.4646(16) | C10   | C11   | 1.521(2)   |
| N     | C31   | 1.4606(17) | C11   | C12   | 1.526(2)   |
| N     | C34   | 1.4608(17) | C12   | C13   | 1.5299(16) |
| C1    | C2    | 1.3458(17) | C21   | C22   | 1.3944(18) |
| C1    | C21   | 1.4778(16) | C21   | C26   | 1.3954(18) |
| C2    | C3    | 1.5139(15) | C22   | C23   | 1.3876(19) |
| C2    | C7    | 1.4601(16) | C23   | C24   | 1.379(2)   |
| C3    | C4    | 1.5241(19) | C24   | C25   | 1.377(2)   |
| C4    | C5    | 1.5203(19) | C25   | C26   | 1.3878(19) |
| C5    | C6    | 1.5011(19) | C31   | C32   | 1.510(2)   |
| C6    | C7    | 1.3375(18) | C33   | C34   | 1.506(2)   |
| C7    | C8    | 1.5097(16) |       |       |            |

**Table 4.** Selected Interatomic Angles (deg)

| Atom1 | Atom2 | Atom3 | Angle      | Atom1 | Atom2 | Atom3 | Angle      |
|-------|-------|-------|------------|-------|-------|-------|------------|
| C1    | O1    | C13   | 116.92(9)  | C8    | C9    | C10   | 111.23(10) |
| C32   | O2    | C33   | 108.97(12) | C9    | C10   | C11   | 110.04(11) |
| C13   | N     | C31   | 117.44(10) | C10   | C11   | C12   | 110.65(11) |
| C13   | N     | C34   | 114.65(11) | C11   | C12   | C13   | 112.96(11) |
| C31   | N     | C34   | 109.11(10) | O1    | C13   | N     | 106.75(9)  |
| O1    | C1    | C2    | 122.94(10) | O1    | C13   | C8    | 108.20(9)  |
| O1    | C1    | C21   | 110.74(10) | O1    | C13   | C12   | 104.33(9)  |
| C2    | C1    | C21   | 126.32(11) | N     | C13   | C8    | 110.28(10) |
| C1    | C2    | C3    | 123.65(11) | N     | C13   | C12   | 114.57(10) |
| C1    | C2    | C7    | 119.90(10) | C8    | C13   | C12   | 112.19(10) |
| C3    | C2    | C7    | 116.41(10) | C1    | C21   | C22   | 120.72(11) |
| C2    | C3    | C4    | 110.22(10) | C1    | C21   | C26   | 121.06(11) |
| C3    | C4    | C5    | 111.21(12) | C22   | C21   | C26   | 118.22(12) |
| C4    | C5    | C6    | 110.88(11) | C21   | C22   | C23   | 120.78(13) |
| C5    | C6    | C7    | 123.52(12) | C22   | C23   | C24   | 120.28(14) |
| C2    | C7    | C6    | 121.99(11) | C23   | C24   | C25   | 119.62(13) |
| C2    | C7    | C8    | 115.33(10) | C24   | C25   | C26   | 120.58(14) |
| C6    | C7    | C8    | 122.65(11) | C21   | C26   | C25   | 120.49(14) |
| C7    | C8    | C9    | 112.73(10) | N     | C31   | C32   | 109.56(12) |
| C7    | C8    | C13   | 107.88(9)  | O2    | C32   | C31   | 112.31(14) |
| C7    | C8    | H8    | 109.1(8)   | O2    | C33   | C34   | 110.99(13) |
| C9    | C8    | C13   | 110.98(10) | N     | C34   | C33   | 108.76(14) |
| C9    | C8    | H8    | 106.6(8)   |       |       |       |            |

**Table 5.** Torsional Angles (deg)

| Atom1 | Atom2 | Atom3 | Atom4 | Angle       | Atom1 | Atom2 | Atom3 | Atom4 | Angle       |
|-------|-------|-------|-------|-------------|-------|-------|-------|-------|-------------|
| C13   | O1    | C1    | C2    | 15.13(16)   | C3    | C4    | C5    | C6    | -48.56(17)  |
| C13   | O1    | C1    | C21   | -165.38(9)  | C4    | C5    | C6    | C7    | 18.1(2)     |
| C1    | O1    | C13   | N     | 70.33(12)   | C5    | C6    | C7    | C2    | 3.7(2)      |
| C1    | O1    | C13   | C8    | -48.36(13)  | C5    | C6    | C7    | C8    | -178.21(13) |
| C1    | O1    | C13   | C12   | -167.99(10) | C2    | C7    | C8    | C9    | 80.52(13)   |
| C33   | O2    | C32   | C31   | -57.80(19)  | C2    | C7    | C8    | C13   | -42.37(13)  |
| C32   | O2    | C33   | C34   | 59.97(19)   | C6    | C7    | C8    | C9    | -97.66(14)  |
| C31   | N     | C13   | O1    | -168.06(10) | C6    | C7    | C8    | C13   | 139.45(12)  |
| C31   | N     | C13   | C8    | -50.74(13)  | C7    | C8    | C9    | C10   | -176.78(10) |
| C31   | N     | C13   | C12   | 76.98(14)   | C13   | C8    | C9    | C10   | -55.64(13)  |
| C34   | N     | C13   | O1    | 61.84(12)   | C7    | C8    | C13   | O1    | 60.27(12)   |
| C34   | N     | C13   | C8    | 179.17(10)  | C7    | C8    | C13   | N     | -56.15(12)  |
| C34   | N     | C13   | C12   | -53.12(14)  | C7    | C8    | C13   | C12   | 174.83(10)  |
| C13   | N     | C31   | C32   | 170.44(12)  | C9    | C8    | C13   | O1    | -63.68(12)  |
| C34   | N     | C31   | C32   | -56.93(15)  | C9    | C8    | C13   | N     | 179.89(9)   |
| C13   | N     | C34   | C33   | -166.63(11) | C9    | C8    | C13   | C12   | 50.87(13)   |
| C31   | N     | C34   | C33   | 59.30(14)   | C8    | C9    | C10   | C11   | 59.48(15)   |
| O1    | C1    | C2    | C3    | -171.87(10) | C9    | C10   | C11   | C12   | -58.15(15)  |
| O1    | C1    | C2    | C7    | 5.80(18)    | C10   | C11   | C12   | C13   | 54.43(15)   |
| C21   | C1    | C2    | C3    | 8.72(19)    | C11   | C12   | C13   | O1    | 65.94(13)   |
| C21   | C1    | C2    | C7    | -173.61(11) | C11   | C12   | C13   | N     | -177.70(10) |
| O1    | C1    | C21   | C22   | 39.77(15)   | C11   | C12   | C13   | C8    | -50.96(14)  |
| O1    | C1    | C21   | C26   | -139.53(12) | C1    | C21   | C22   | C23   | 179.68(12)  |
| C2    | C1    | C21   | C22   | -140.76(13) | C26   | C21   | C22   | C23   | -1.00(19)   |
| C2    | C1    | C21   | C26   | 39.94(18)   | C1    | C21   | C26   | C25   | -178.82(12) |
| C1    | C2    | C3    | C4    | 141.23(12)  | C22   | C21   | C26   | C25   | 1.86(19)    |
| C7    | C2    | C3    | C4    | -36.51(14)  | C21   | C22   | C23   | C24   | -0.5(2)     |
| C1    | C2    | C7    | C6    | -171.78(12) | C22   | C23   | C24   | C25   | 1.2(2)      |
| C1    | C2    | C7    | C8    | 10.02(16)   | C23   | C24   | C25   | C26   | -0.4(2)     |
| C3    | C2    | C7    | C6    | 6.05(17)    | C24   | C25   | C26   | C21   | -1.2(2)     |
| C3    | C2    | C7    | C8    | -172.15(10) | N     | C31   | C32   | O2    | 56.98(17)   |
| C2    | C3    | C4    | C5    | 58.16(15)   | O2    | C33   | C34   | N     | -61.69(17)  |

**Table 6.** Anisotropic Displacement Parameters ( $U_{ij}$ , Å<sup>2</sup>)

| Atom | $U_{11}$   | $U_{22}$  | $U_{33}$   | $U_{23}$   | $U_{13}$           |
|------|------------|-----------|------------|------------|--------------------|
|      | $U_{12}$   |           |            |            |                    |
| O1   | 0.0314(4)  | 0.0355(4) | 0.0313(4)  | -0.0040(3) | 0.0049(3)0.0027(3) |
| O2   | 0.0673(7)  | 0.0807(9) | 0.0687(8)  | -0.0103(6) | 0.0346(6)          |
|      | -0.0364(7) |           |            |            |                    |
| N    | 0.0288(5)  | 0.0434(6) | 0.0340(5)  | -0.0046(4) | 0.0092(4)          |
|      | -0.0064(4) |           |            |            |                    |
| C1   | 0.0291(5)  | 0.0332(6) | 0.0289(6)  | -0.0008(4) | 0.0067(4)          |
|      | -0.0038(4) |           |            |            |                    |
| C2   | 0.0265(5)  | 0.0340(6) | 0.0310(6)  | -0.0012(4) | 0.0086(4)          |
|      | -0.0033(4) |           |            |            |                    |
| C3   | 0.0307(6)  | 0.0429(7) | 0.0308(6)  | 0.0007(5)  | 0.0067(5)0.0003(5) |
| C4   | 0.0443(7)  | 0.0460(7) | 0.0384(7)  | 0.0057(5)  | 0.0120(6)0.0129(6) |
| C5   | 0.0493(8)  | 0.0573(9) | 0.0437(8)  | 0.0001(6)  | 0.0120(6)0.0222(7) |
| C6   | 0.0374(6)  | 0.0482(7) | 0.0363(6)  | -0.0051(5) | 0.0115(5)0.0087(5) |
| C7   | 0.0260(5)  | 0.0378(6) | 0.0322(6)  | -0.0026(5) | 0.0095(4)          |
|      | -0.0019(4) |           |            |            |                    |
| C8   | 0.0301(6)  | 0.0342(6) | 0.0305(6)  | -0.0034(5) | 0.0084(4)          |
|      | -0.0025(4) |           |            |            |                    |
| C9   | 0.0395(6)  | 0.0438(7) | 0.0361(6)  | -0.0012(5) | 0.0138(5)          |
|      | -0.0062(5) |           |            |            |                    |
| C10  | 0.0560(8)  | 0.0405(7) | 0.0356(7)  | 0.0015(5)  | 0.0152(6)          |
|      | -0.0033(6) |           |            |            |                    |
| C11  | 0.0573(8)  | 0.0428(7) | 0.0357(7)  | 0.0040(6)  | 0.0091(6)0.0082(6) |
| C12  | 0.0345(6)  | 0.0489(7) | 0.0323(6)  | -0.0003(5) | 0.0033(5)0.0054(5) |
| C13  | 0.0292(5)  | 0.0357(6) | 0.0286(6)  | -0.0036(5) | 0.0053(4)          |
|      | -0.0010(5) |           |            |            |                    |
| C21  | 0.0399(6)  | 0.0275(5) | 0.0310(6)  | 0.0021(4)  | 0.0097(5)          |
|      | -0.0003(5) |           |            |            |                    |
| C22  | 0.0435(7)  | 0.0366(6) | 0.0413(7)  | -0.0013(5) | 0.0125(5)0.0059(5) |
| C23  | 0.0669(9)  | 0.0414(7) | 0.0458(8)  | -0.0001(6) | 0.0214(7)0.0162(7) |
| C24  | 0.0842(11) | 0.0301(6) | 0.0347(7)  | -0.0021(5) | 0.0137(7)0.0084(7) |
| C25  | 0.0647(9)  | 0.0356(7) | 0.0390(7)  | -0.0046(5) | 0.0048(6)          |
|      | -0.0077(6) |           |            |            |                    |
| C26  | 0.0458(7)  | 0.0365(7) | 0.0402(7)  | -0.0046(5) | 0.0096(6)          |
|      | -0.0070(5) |           |            |            |                    |
| C31  | 0.0426(7)  | 0.0415(7) | 0.0419(7)  | -0.0040(6) | 0.0132(5)          |
|      | -0.0080(6) |           |            |            |                    |
| C32  | 0.0672(10) | 0.0554(9) | 0.0659(10) | 0.0055(8)  | 0.0263(8)          |

|     |            |            |           |            |           |
|-----|------------|------------|-----------|------------|-----------|
|     | -0.0161(8) |            |           |            |           |
| C33 | 0.0552(9)  | 0.0973(14) | 0.0539(9) | -0.0205(9) | 0.0295(8) |
|     | -0.0341(9) |            |           |            |           |
| C34 | 0.0368(7)  | 0.0663(9)  | 0.0536(8) | -0.0184(7) | 0.0206(6) |
|     | -0.0129(6) |            |           |            |           |

The form of the anisotropic displacement parameter is:

$$\exp[-2\pi^2(h^2a^2U_{11} + k^2b^2U_{22} + l^2c^2U_{33} + 2klb^*c^*U_{23} + 2hla^*c^*U_{13} + 2hka^*b^*U_{12})]$$

**Table 7.** Derived Atomic Coordinates and Displacement Parameters for Hydrogen Atoms

| Atom | <i>x</i> | <i>y</i>  | <i>z</i> | $U_{\text{eq}}, \text{\AA}^2$ |
|------|----------|-----------|----------|-------------------------------|
| H3A  | 0.911935 | 0.221683  | 0.899722 | 0.043                         |
| H3B  | 0.984375 | 0.230072  | 0.848608 | 0.043                         |
| H4A  | 0.988509 | -0.029007 | 0.910321 | 0.052                         |
| H4B  | 0.879726 | -0.050090 | 0.858032 | 0.052                         |
| H5A  | 1.020473 | -0.041585 | 0.780163 | 0.062                         |
| H5B  | 0.951860 | -0.188206 | 0.775799 | 0.062                         |
| H6   | 0.882825 | -0.061025 | 0.636365 | 0.049                         |
| H9A  | 0.831494 | 0.410015  | 0.599556 | 0.048                         |
| H9B  | 0.861746 | 0.279582  | 0.541682 | 0.048                         |
| H10A | 0.762351 | 0.471730  | 0.445949 | 0.053                         |
| H10B | 0.714138 | 0.298513  | 0.427430 | 0.053                         |
| H11A | 0.605976 | 0.491397  | 0.437913 | 0.057                         |
| H11B | 0.674382 | 0.543267  | 0.534817 | 0.057                         |
| H12A | 0.583924 | 0.238216  | 0.490014 | 0.049                         |
| H12B | 0.562306 | 0.370314  | 0.552375 | 0.049                         |
| H22  | 0.656065 | 0.472472  | 0.806844 | 0.049                         |
| H23  | 0.665197 | 0.660810  | 0.916915 | 0.061                         |
| H24  | 0.808146 | 0.764063  | 1.005457 | 0.062                         |
| H25  | 0.941520 | 0.685228  | 0.980449 | 0.060                         |
| H26  | 0.933365 | 0.501997  | 0.868263 | 0.051                         |
| H31A | 0.687249 | -0.073151 | 0.599509 | 0.051                         |
| H31B | 0.579176 | -0.032634 | 0.554524 | 0.051                         |
| H32A | 0.596963 | -0.268553 | 0.638876 | 0.074                         |
| H32B | 0.663981 | -0.177973 | 0.725425 | 0.074                         |
| H33A | 0.604215 | 0.022045  | 0.792324 | 0.079                         |
| H33B | 0.495682 | 0.061024  | 0.754519 | 0.079                         |
| H34A | 0.510609 | 0.166859  | 0.622690 | 0.061                         |
| H34B | 0.575020 | 0.263268  | 0.708693 | 0.061                         |
